# Supplementary material
Source: HighWire-hosted journal article supplement (doi:10.1101/rna.080458.125)
Supplement: Supplemental_Tables.xlsx [file Supplemental_Tables.xlsx]

## Sheet: Table S1 - XUTs
Chr	Start	Stop	Strand	Length	ID	upf1 vs WT (adjusted P-value)	upf1 vs WT (FC, log2)	Upf1-sensitive	WT-CHX vs WT (adjusted P-value)	WT-CHX vs WT (FC, log2)	CHX-sensitive	Translated	Putative novel mRNA	upf2 vs WT (adjusted P-value)	upf2 vs WT (FC, log2)	Upf2-sensitive	upf3 vs WT (adjusted P-value)	upf3 vs WT (FC, log2)	Upf3-sensitive
Chr_1	11904	12896	-	993	XUT0001	6.54205e-07	1.4229	TRUE	7.23101e-06	1.45143	TRUE	TRUE	FALSE	0.00121635	0.774047	FALSE	0.0804005	0.4532	FALSE
Chr_1	27544	27994	+	451	XUT0002	0.594501	0.151095	FALSE	0.000154785	0.993022	FALSE	FALSE	FALSE	0.267573	0.600483	FALSE	0.00199895	1.22721	TRUE
Chr_1	30903	31154	-	252	XUT0003	0.598229	0.528683	FALSE	0.0785534	1.34224	FALSE	FALSE	FALSE	0.619326	0.739476	FALSE	0.818344	0.246058	FALSE
Chr_1	32163	32708	+	546	XUT0004	3.82061e-13	2.05266	TRUE	1.45936e-14	2.4124	TRUE	TRUE	FALSE	7.66391e-16	1.91204	TRUE	1.76076e-08	1.41009	TRUE
Chr_1	34078	34851	+	774	XUT0005	0.931766	0.0567847	FALSE	0.0618636	0.786482	FALSE	FALSE	FALSE	0.593092	-0.150122	FALSE	0.00871658	-0.411012	FALSE
Chr_1	37356	37782	-	427	XUT0006	0.00953373	1.74874	TRUE	0.000178756	2.59475	TRUE	FALSE	FALSE	0.00513954	2.3023	TRUE	0.0123972	2.02431	TRUE
Chr_1	47024	47323	+	300	XUT0007	0.127621	0.951756	FALSE	0.000143044	2.34213	TRUE	FALSE	FALSE	0.454263	0.560392	FALSE	0.0239604	-1.26067	FALSE
Chr_1	58525	60314	-	1790	XUT0008	1.29131e-26	1.83892	TRUE	8.60177e-31	2.32352	TRUE	FALSE	FALSE	3.3389e-22	1.6048	TRUE	3.58656e-24	1.69217	TRUE
Chr_1	58683	59419	+	737	XUT0009	2.9808e-10	1.63234	TRUE	7.36931e-23	2.71431	TRUE	FALSE	FALSE	3.16021e-06	1.19651	TRUE	3.14694e-08	1.4209	TRUE
Chr_1	61739	62427	+	689	XUT0010	0.000124016	2.41913	TRUE	3.98897e-06	2.94352	TRUE	FALSE	FALSE	2.49634e-05	2.36848	TRUE	9.44082e-05	2.25577	TRUE
Chr_1	86069	87330	+	1262	XUT0011	0.0728839	0.804391	FALSE	6.83114e-05	1.69315	TRUE	FALSE	FALSE	0.0215751	0.93457	FALSE	0.202182	0.5468	FALSE
Chr_1	88276	88502	+	227	XUT0012	0.403073	0.558126	FALSE	0.0237014	1.85183	TRUE	FALSE	FALSE	0.475021	1.29291	FALSE	0.254703	1.44853	FALSE
Chr_1	88743	89213	+	471	XUT0013	0.00253444	1.95657	TRUE	0.000392338	2.35229	TRUE	FALSE	FALSE	3.1962e-05	2.30256	TRUE	3.04248e-06	2.58563	TRUE
Chr_1	90462	90750	-	289	XUT0014	0.159108	1.07249	FALSE	0.165631	1.07701	FALSE	FALSE	FALSE	0.995141	1.13314e-05	FALSE	0.0646781	2.12136	FALSE
Chr_1	95478	95767	-	290	XUT0015	0.334563	0.743302	FALSE	0.519232	0.489653	FALSE	FALSE	FALSE	0.0677955	1.58634	FALSE	0.724739	0.37745	FALSE
Chr_1	102271	102657	+	387	XUT0016	4.32172e-06	2.05265	TRUE	6.86477e-06	2.22243	TRUE	FALSE	FALSE	2.65628e-07	1.60467	TRUE	5.32795e-06	1.46875	TRUE
Chr_1	121751	121998	-	248	XUT0017	0.900656	0.208804	FALSE	0.98062	-0.00205897	FALSE	FALSE	FALSE	0.681229	0.476737	FALSE	0.809919	0.189602	FALSE
Chr_1	129444	132297	+	2854	XUT0018	2.68611e-12	1.43478	TRUE	1.26633e-23	2.28397	TRUE	FALSE	FALSE	1.52289e-15	1.58618	TRUE	6.676e-09	1.20345	TRUE
Chr_1	164038	164691	+	654	XUT0019	0.021354	1.61122	TRUE	0.000580776	2.36324	TRUE	FALSE	FALSE	0.148189	1.31914	FALSE	0.0308646	1.68849	TRUE
Chr_1	164237	164630	-	394	XUT0020	0.331121	0.884533	FALSE	0.00783515	1.96353	TRUE	FALSE	FALSE	0.000834855	3.18288	TRUE	0.00209065	2.91791	TRUE
Chr_1	171432	171976	+	545	XUT0021	0.938988	0.054083	FALSE	0.0396386	1.20306	TRUE	FALSE	FALSE	0.305518	1.32928	FALSE	0.0854556	1.71719	FALSE
Chr_1	176214	177091	-	878	XUT0022	0.11373	0.928186	FALSE	2.9845e-06	2.50038	TRUE	FALSE	FALSE	0.0282722	1.38446	TRUE	0.0278009	1.31272	TRUE
Chr_1	177772	178582	-	811	XUT0023	4.91338e-14	2.71583	TRUE	8.96681e-14	2.90346	TRUE	TRUE	FALSE	1.86323e-22	2.54544	TRUE	7.91466e-15	2.09166	TRUE
Chr_1	184694	184921	-	228	XUT0024	0.0173858	1.62894	TRUE	0.00111178	2.30278	TRUE	FALSE	FALSE	0.715016	0.665168	FALSE	0.0644418	1.71871	FALSE
Chr_1	240883	241578	-	696	XUT0025	0.00153988	1.50429	TRUE	7.05074e-17	3.71818	TRUE	TRUE	FALSE	0.120037	0.759294	FALSE	0.0115383	1.06742	TRUE
Chr_1	244011	244637	+	627	XUT0026	0.000630777	0.776033	FALSE	4.15453e-12	1.68283	TRUE	FALSE	FALSE	0.0668351	0.484693	FALSE	0.00884325	0.616856	FALSE
Chr_1	271939	273800	-	1862	XUT0027	9.41977e-13	2.73974	TRUE	5.42433e-41	5.3305	TRUE	TRUE	FALSE	2.99755e-12	1.89271	TRUE	2.92964e-14	2.09198	TRUE
Chr_1	276474	277042	-	569	XUT0028	5.215e-08	2.40789	TRUE	4.84424e-10	2.91881	TRUE	TRUE	FALSE	0.00068907	1.31656	TRUE	0.00923723	1.05384	TRUE
Chr_1	280029	280720	+	692	XUT0029	0.289668	0.872559	FALSE	0.00577752	1.96346	TRUE	FALSE	FALSE	0.137885	1.03678	FALSE	0.258712	0.726631	FALSE
Chr_1	305556	305898	+	343	XUT0030	0.0498642	1.26632	TRUE	0.000326705	2.19449	TRUE	FALSE	FALSE	0.280608	1.17476	FALSE	0.142757	1.31654	FALSE
Chr_1	306535	307134	+	600	XUT0031	2.0021e-17	2.73389	TRUE	4.09034e-11	2.41958	TRUE	FALSE	FALSE	9.0967e-26	2.00412	TRUE	3.8745e-16	1.60495	TRUE
Chr_1	312708	313017	-	310	XUT0032	0.252886	0.749119	FALSE	0.00120672	1.92079	TRUE	FALSE	FALSE	0.116675	1.20811	FALSE	0.00637904	1.80954	TRUE
Chr_1	313197	313567	-	371	XUT0033	0.41192	0.573716	FALSE	1.49316e-06	2.7205	TRUE	FALSE	FALSE	0.908492	0.325581	FALSE	0.685065	0.440509	FALSE
Chr_1	349043	349547	-	505	XUT0035	5.0139e-11	3.59303	TRUE	1.30465e-09	3.45417	TRUE	FALSE	FALSE	8.84382e-26	3.23814	TRUE	4.63381e-16	2.60356	TRUE
Chr_1	354865	355933	+	1069	XUT0036	3.01349e-10	1.50603	TRUE	1.46529e-20	2.46324	TRUE	FALSE	FALSE	0.000126087	1.06856	TRUE	8.64711e-07	1.33791	TRUE
Chr_1	366367	367978	-	1612	XUT0037	1.07203e-10	2.07154	TRUE	1.91212e-07	1.88609	TRUE	FALSE	FALSE	9.29415e-25	2.79225	TRUE	7.72041e-18	2.41488	TRUE
Chr_1	367994	368567	-	574	XUT0038	0.0156688	1.12152	TRUE	2.21522e-05	1.98185	TRUE	FALSE	FALSE	7.56801e-05	1.87405	TRUE	6.89345e-06	2.11522	TRUE
Chr_1	368971	369627	-	657	XUT0039	0.000198456	2.0645	TRUE	1.27012e-06	2.82514	TRUE	FALSE	FALSE	0.000254163	1.4468	TRUE	0.00469405	1.16327	TRUE
Chr_1	376685	377015	-	331	XUT0040	0.148526	0.847993	FALSE	4.07282e-12	3.65714	TRUE	FALSE	FALSE	0.0867412	1.41055	FALSE	0.166865	1.06727	FALSE
Chr_1	381742	383202	-	1461	XUT0042	3.48831e-34	2.35385	TRUE	1.44944e-64	3.6678	TRUE	TRUE	FALSE	6.78821e-56	2.48308	TRUE	3.52502e-46	2.28617	TRUE
Chr_1	385679	386353	-	675	XUT0043	0.0478493	1.75034	TRUE	3.34616e-05	3.48503	TRUE	FALSE	FALSE	0.818508	0.430521	FALSE	0.228195	1.04828	FALSE
Chr_1	397898	398314	+	417	XUT0044	0.0165607	0.851258	FALSE	0.00297965	1.06724	TRUE	FALSE	FALSE	0.579323	0.430761	FALSE	0.0470388	0.877056	FALSE
Chr_1	402650	404312	-	1663	XUT0045	6.87163e-17	2.45892	TRUE	2.83005e-14	2.53784	TRUE	FALSE	FALSE	2.88324e-22	2.03654	TRUE	6.04256e-21	2.00822	TRUE
Chr_1	419713	420950	-	1238	XUT0046	4.37949e-12	1.85613	TRUE	1.05359e-44	3.8066	TRUE	TRUE	FALSE	5.46074e-15	1.85376	TRUE	1.5716e-10	1.5658	TRUE
Chr_1	448199	448979	-	781	XUT0047	0.00520249	1.18088	TRUE	0.0049474	1.31612	TRUE	FALSE	FALSE	0.0584335	1.04538	FALSE	0.000758456	1.61059	TRUE
Chr_1	457013	457285	+	273	XUT0048	0.124978	1.06296	FALSE	0.000788022	2.61571	TRUE	FALSE	FALSE	0.983916	0.0988235	FALSE	1	-0.0806471	FALSE
Chr_1	480828	481769	+	942	XUT0049	6.94198e-104	3.20502	TRUE	7.65249e-66	3.01117	TRUE	TRUE	FALSE	5.6417e-92	2.70575	TRUE	9.40861e-70	2.3663	TRUE
Chr_1	481826	484156	+	2331	XUT0050	4.68423e-21	1.9146	TRUE	1.54368e-07	1.29663	TRUE	FALSE	FALSE	2.26927e-26	1.75701	TRUE	2.41001e-21	1.59884	TRUE
Chr_1	501261	501611	+	351	XUT0051	0.0299799	1.49991	TRUE	2.05042e-11	3.84054	TRUE	FALSE	FALSE	0.318394	1.03076	FALSE	0.425964	0.707969	FALSE
Chr_1	502464	502942	+	479	XUT0052	0.00580102	1.51349	TRUE	1.23152e-12	3.9313	TRUE	FALSE	FALSE	0.0226969	1.43124	TRUE	0.238653	0.77235	FALSE
Chr_1	505940	506931	+	992	XUT0053	7.4969e-05	1.38271	TRUE	4.65231e-17	2.97937	TRUE	FALSE	FALSE	0.000169099	1.28698	TRUE	7.87816e-06	1.51688	TRUE
Chr_1	516449	517501	-	1053	XUT0054	1.657e-32	2.28684	TRUE	6.44276e-27	2.38559	TRUE	TRUE	FALSE	2.19367e-25	2.16505	TRUE	3.15626e-26	2.21864	TRUE
Chr_1	540875	541261	-	387	XUT0055	0.562939	-0.363216	FALSE	0.00818265	1.02656	TRUE	TRUE	FALSE	0.63238	0.492216	FALSE	0.448312	-0.480544	FALSE
Chr_1	574329	575797	+	1469	XUT0056	2.65785e-19	1.29819	TRUE	5.23613e-53	2.51523	TRUE	FALSE	FALSE	2.13332e-10	1.15362	TRUE	1.07107e-09	1.12067	TRUE
Chr_1	599372	601203	-	1832	XUT0057	1.6246e-38	2.46515	TRUE	2.08832e-25	2.31747	TRUE	TRUE	FALSE	5.06534e-35	2.09634	TRUE	4.08409e-23	1.7166	TRUE
Chr_1	601672	603421	-	1750	XUT0058	1.00378e-42	2.7567	TRUE	3.00487e-26	2.52212	TRUE	FALSE	FALSE	2.07795e-71	2.89411	TRUE	7.40874e-61	2.6966	TRUE
Chr_1	614205	614910	+	706	XUT0060	1.25268e-09	1.83671	TRUE	1.04105e-07	1.84461	TRUE	FALSE	FALSE	8.51569e-17	2.34175	TRUE	1.33243e-16	2.37778	TRUE
Chr_1	633806	634035	-	230	XUT0061	1	-0.0143588	FALSE	0.878932	0.0861603	FALSE	FALSE	FALSE	NA	NA	NA	NA	NA	NA
Chr_1	684106	684548	-	443	XUT0062	0.0012972	1.54399	TRUE	1.51761e-05	2.18662	TRUE	FALSE	FALSE	0.000193254	1.68438	TRUE	0.00184565	1.47084	TRUE
Chr_1	686857	687235	-	379	XUT0063	0.00753889	1.63225	TRUE	0.000364708	2.30864	TRUE	FALSE	FALSE	0.00832279	1.78829	TRUE	0.0295724	1.47955	TRUE
Chr_1	694798	695330	+	533	XUT0064	0.54654	0.316861	FALSE	0.00948589	1.12765	TRUE	FALSE	FALSE	0.0108709	0.988315	FALSE	0.182832	0.555948	FALSE
Chr_1	711416	711953	+	538	XUT0065	5.90157e-10	2.3556	TRUE	1.09914e-13	3.0237	TRUE	TRUE	FALSE	9.42944e-07	1.62968	TRUE	3.1994e-05	1.42263	TRUE
Chr_1	724055	724647	+	593	XUT0066	0.043416	0.792241	FALSE	7.85973e-08	1.96414	TRUE	FALSE	FALSE	8.36213e-05	1.41351	TRUE	0.00743781	1.02502	TRUE
Chr_1	745245	746640	-	1396	XUT0067	7.88316e-111	2.64852	TRUE	1.17694e-37	1.86886	TRUE	TRUE	FALSE	1.93306e-81	2.61809	TRUE	2.03452e-75	2.52585	TRUE
Chr_1	749142	749607	-	466	XUT0068	1.11676e-12	1.48889	TRUE	8.11592e-10	1.51578	TRUE	FALSE	FALSE	4.7705e-08	1.2199	TRUE	1.2756e-06	1.10377	TRUE
Chr_1	760881	761100	-	220	XUT0070	0.264372	0.601167	FALSE	0.00126911	1.75088	TRUE	TRUE	FALSE	0.500679	0.49719	FALSE	0.548077	-0.313699	FALSE
Chr_1	765816	766056	-	241	XUT0071	0.479027	-0.293691	FALSE	0.000252994	1.50073	TRUE	FALSE	FALSE	0.801469	-0.267703	FALSE	0.0954467	-0.837503	FALSE
Chr_1	766026	766244	+	219	XUT0072	1	0.759902	FALSE	0.453084	0.757179	FALSE	FALSE	FALSE	0.940058	0.337588	FALSE	1	0	FALSE
Chr_1	784142	784413	-	272	XUT0073	0.223517	0.996049	FALSE	0.00199872	1.99813	TRUE	FALSE	FALSE	0.2404	1.14731	FALSE	0.208853	1.02891	FALSE
Chr_1	791859	792305	-	447	XUT0074	0.0270556	1.22565	TRUE	4.60023e-05	2.17753	TRUE	FALSE	FALSE	0.829531	-0.327796	FALSE	0.294249	0.691726	FALSE
Chr_1	814362	815263	-	902	XUT0075	0.435649	0.618657	FALSE	1.06164e-05	2.64559	TRUE	FALSE	FALSE	0.63205	0.510837	FALSE	0.341814	0.626918	FALSE
Chr_1	825122	825378	+	257	XUT0076	0.671309	0.325644	FALSE	0.000432972	1.90129	TRUE	FALSE	FALSE	0.850147	-0.282031	FALSE	0.735281	-0.287107	FALSE
Chr_1	844663	844873	+	211	XUT0077	0.360097	0.845923	FALSE	0.00093442	2.78238	TRUE	FALSE	FALSE	0.818508	0.610343	FALSE	0.450804	1.07088	FALSE
Chr_1	848652	849269	+	618	XUT0078	0.00735006	1.48174	TRUE	1.37154e-05	2.38486	TRUE	FALSE	FALSE	0.0490758	1.35208	TRUE	0.138928	0.985891	FALSE
Chr_1	854991	855606	-	616	XUT0079	9.04989e-59	3.0023	TRUE	5.01505e-29	2.44893	TRUE	TRUE	FALSE	4.07466e-80	2.91869	TRUE	1.99886e-68	2.72814	TRUE
Chr_1	862156	862445	-	290	XUT0080	0.318121	0.670489	FALSE	1.5313e-18	5.92516	TRUE	TRUE	FALSE	0.804708	0.724838	FALSE	0.735534	-0.50517	FALSE
Chr_1	900131	900453	-	323	XUT0081	0.288466	0.499118	FALSE	0.0001639	1.50507	TRUE	TRUE	FALSE	0.632919	0.348063	FALSE	0.818791	-0.107028	FALSE
Chr_1	905702	906350	-	649	XUT0082	0.227866	0.724657	FALSE	1.32512e-06	2.51233	TRUE	FALSE	FALSE	0.99225	0.00153915	FALSE	0.199758	0.795422	FALSE
Chr_1	920739	920954	-	216	XUT0083	0.920876	-0.0341537	FALSE	0.172859	0.757042	FALSE	FALSE	FALSE	0.767334	-0.306951	FALSE	0.662778	-0.256321	FALSE
Chr_1	936718	939331	-	2614	XUT0084	3.96557e-30	2.32827	TRUE	6.29955e-32	2.74758	TRUE	FALSE	FALSE	1.43387e-18	1.94015	TRUE	3.81572e-19	1.99181	TRUE
Chr_1	952165	953587	-	1423	XUT0085	2.54853e-48	2.31728	TRUE	2.90058e-45	2.69002	TRUE	TRUE	FALSE	1.55784e-45	2.03802	TRUE	2.43644e-38	1.87746	TRUE
Chr_1	999161	999932	-	772	XUT0086	0.0204588	1.22398	TRUE	0.0222568	1.24512	TRUE	FALSE	FALSE	1.15096e-05	2.61137	TRUE	5.55375e-05	2.45323	TRUE
Chr_1	1014450	1015661	+	1212	XUT0087	2.52702e-25	2.29333	TRUE	8.44286e-13	1.86811	TRUE	FALSE	FALSE	1.3301e-49	2.99842	TRUE	3.26857e-53	3.13648	TRUE
Chr_1	1030063	1031137	-	1075	XUT0088	3.05851e-27	1.62501	TRUE	5.20779e-66	2.92873	TRUE	TRUE	FALSE	1.6478e-15	1.4787	TRUE	5.49841e-15	1.46368	TRUE
Chr_1	1031175	1031638	-	464	XUT0089	0.0404337	1.66015	TRUE	1.45516e-06	4.06155	TRUE	FALSE	FALSE	0.204107	1.03817	FALSE	0.106257	1.09951	FALSE
Chr_1	1036572	1036845	-	274	XUT0090	0.181207	-0.962124	FALSE	0.199429	0.966574	FALSE	FALSE	FALSE	0.953239	-0.377622	FALSE	1	0.181664	FALSE
Chr_1	1040875	1042429	+	1555	XUT0091	8.85809e-19	1.71965	TRUE	2.92764e-16	1.85783	TRUE	TRUE	FALSE	1.83934e-17	1.52785	TRUE	1.95688e-10	1.18128	TRUE
Chr_1	1041473	1042039	-	567	XUT0092	0.581909	0.422087	FALSE	0.000138926	1.59654	TRUE	FALSE	FALSE	0.916901	0.116893	FALSE	0.834525	-0.103117	FALSE
Chr_1	1046668	1047061	-	394	XUT0093	1.35989e-11	1.84466	TRUE	5.99206e-08	1.69201	TRUE	FALSE	FALSE	4.54906e-09	1.27636	TRUE	3.06879e-09	1.31952	TRUE
Chr_1	1053934	1054948	-	1015	XUT0095	1.30931e-08	1.83275	TRUE	2.02354e-08	2.04348	TRUE	FALSE	FALSE	3.87452e-10	1.94463	TRUE	1.94479e-08	1.80396	TRUE
Chr_1	1074441	1074852	+	412	XUT0096	0.195897	0.62187	FALSE	0.00116811	1.61358	TRUE	TRUE	FALSE	0.630684	-0.768773	FALSE	0.831618	-0.227581	FALSE
Chr_1	1086603	1086919	+	317	XUT0097	0.0139313	1.39627	TRUE	6.72737e-06	2.60158	TRUE	FALSE	FALSE	0.512409	0.768309	FALSE	0.188859	1.01278	FALSE
Chr_1	1088680	1088885	-	206	XUT0098	0.302059	0.913736	FALSE	0.467181	-0.617482	FALSE	FALSE	FALSE	0.242732	1.41439	FALSE	0.504001	-0.697076	FALSE
Chr_1	1119484	1120874	+	1391	XUT0099	2.7078e-74	3.16437	TRUE	3.14306e-64	3.43172	TRUE	FALSE	FALSE	2.1524e-77	2.75859	TRUE	2.57416e-77	2.7769	TRUE
Chr_1	1127644	1128287	-	644	XUT0100	0.000128095	1.53947	TRUE	2.89682e-09	2.44196	TRUE	FALSE	FALSE	0.00434969	1.44329	TRUE	0.00257425	1.50017	TRUE
Chr_1	1132207	1132679	-	473	XUT0101	0.0313203	1.66228	TRUE	5.2801e-06	3.41129	TRUE	FALSE	FALSE	0.000675226	2.44615	TRUE	0.0187376	1.75652	TRUE
Chr_1	1132950	1133639	-	690	XUT0102	0.0842513	1.48731	FALSE	0.0040735	2.34215	TRUE	FALSE	FALSE	1.595e-05	3.22194	TRUE	5.49635e-05	3.06692	TRUE
Chr_1	1140428	1140841	+	414	XUT0103	3.85062e-05	1.71498	TRUE	0.00595393	1.32034	TRUE	FALSE	FALSE	1.78862e-05	1.36867	TRUE	0.126533	0.565024	FALSE
Chr_1	1140843	1141296	-	454	XUT0104	5.9504e-06	1.13937	TRUE	1.15194e-23	2.60393	TRUE	FALSE	FALSE	8.32412e-05	0.978474	FALSE	0.00440656	0.741389	FALSE
Chr_1	1148508	1149459	-	952	XUT0105	1.0629e-11	1.8683	TRUE	4.14205e-23	2.89525	TRUE	TRUE	FALSE	1.03141e-12	1.6409	TRUE	1.79422e-10	1.51919	TRUE
Chr_1	1184728	1185206	-	479	XUT0106	0.0117216	1.83309	TRUE	3.11693e-06	3.2095	TRUE	FALSE	FALSE	0.890554	0.26097	FALSE	0.0854556	1.23926	FALSE
Chr_1	1203028	1203367	-	340	XUT0107	0.0616926	0.952044	FALSE	1.07476e-05	2.16386	TRUE	FALSE	FALSE	1.98769e-05	2.01544	TRUE	4.48505e-05	1.97378	TRUE
Chr_1	1205122	1205640	+	519	XUT0108	0.550279	0.385962	FALSE	2.75087e-09	3.00373	TRUE	FALSE	FALSE	0.0374064	1.5739	TRUE	0.161121	1.05363	FALSE
Chr_1	1221287	1221746	-	460	XUT0109	0.596321	0.184497	FALSE	4.50557e-05	1.5453	TRUE	FALSE	FALSE	0.983617	0.0412894	FALSE	0.745189	0.164107	FALSE
Chr_1	1225469	1225942	-	474	XUT0110	0.00278659	1.1574	TRUE	1.18632e-08	2.16722	TRUE	FALSE	FALSE	0.00188583	1.17987	TRUE	0.00255397	1.14294	TRUE
Chr_1	1232205	1233079	+	875	XUT0111	0.00414022	1.5624	TRUE	1.51241e-07	2.85837	TRUE	FALSE	FALSE	0.00189789	1.69773	TRUE	0.00596549	1.53469	TRUE
Chr_1	1259065	1259368	+	304	XUT0112	0.0494521	0.921579	FALSE	7.12438e-06	2.01756	TRUE	FALSE	FALSE	0.0253204	1.09033	TRUE	0.784632	0.185675	FALSE
Chr_1	1264258	1264702	+	445	XUT0113	1.34157e-06	1.10312	TRUE	2.46631e-14	1.89019	TRUE	FALSE	FALSE	0.121289	0.369119	FALSE	0.385432	0.202004	FALSE
Chr_1	1305190	1306581	-	1392	XUT0114	7.26466e-18	1.89829	TRUE	7.24402e-23	2.44338	TRUE	TRUE	FALSE	1.32338e-12	1.61008	TRUE	2.56801e-12	1.60856	TRUE
Chr_1	1314974	1315902	-	929	XUT0116	3.4048e-11	2.20102	TRUE	1.32861e-08	2.12844	TRUE	FALSE	FALSE	3.49121e-06	1.50655	TRUE	3.20622e-05	1.40486	TRUE
Chr_1	1318802	1319888	-	1087	XUT0117	0.00113266	0.971959	FALSE	6.16178e-20	2.87842	TRUE	FALSE	FALSE	0.978299	-0.0249648	FALSE	0.99734	0.00477068	FALSE
Chr_1	1342051	1343717	-	1667	XUT0118	6.70199e-19	1.84474	TRUE	3.7581e-54	3.48455	TRUE	FALSE	FALSE	3.85241e-09	1.33433	TRUE	1.03982e-13	1.66996	TRUE
Chr_1	1365915	1366129	-	215	XUT0119	0.300591	0.697054	FALSE	0.72113	0.25501	FALSE	FALSE	FALSE	0.717718	0.448919	FALSE	0.687953	0.299799	FALSE
Chr_1	1371306	1372024	-	719	XUT0120	0.0802764	0.78952	FALSE	5.77585e-15	3.19656	TRUE	FALSE	FALSE	0.40162	0.704413	FALSE	0.0160739	1.34556	TRUE
Chr_1	1388232	1388857	+	626	XUT0121	0.152687	0.304135	FALSE	1.28075e-06	0.969841	FALSE	TRUE	FALSE	0.940591	0.0386261	FALSE	0.241769	-0.21529	FALSE
Chr_1	1399468	1399682	-	215	XUT0122	0.488593	-0.637527	FALSE	1.74048e-05	3.2217	TRUE	FALSE	FALSE	0.92752	0.337588	FALSE	1	1.43954	FALSE
Chr_1	1420044	1420600	+	557	XUT0123	0.000326548	2.60379	TRUE	3.83251e-05	2.96848	TRUE	FALSE	FALSE	0.0280021	1.40356	TRUE	0.00684678	1.63408	TRUE
Chr_1	1432754	1433490	+	737	XUT0124	4.47228e-06	1.37408	TRUE	1.2213e-05	1.46932	TRUE	FALSE	FALSE	3.04878e-05	1.42162	TRUE	8.35488e-06	1.52263	TRUE
Chr_1	1433763	1436022	+	2260	XUT0125	1.83301e-28	2.07642	TRUE	1.20587e-19	2.00639	TRUE	FALSE	FALSE	1.36035e-26	1.8301	TRUE	1.71483e-14	1.35393	TRUE
Chr_1	1433944	1434456	-	513	XUT0126	0.947442	-0.13072	FALSE	8.04027e-11	3.38148	TRUE	TRUE	FALSE	0.627525	0.536419	FALSE	0.278027	0.703234	FALSE
Chr_1	1435964	1437000	-	1037	XUT0127	8.53415e-45	2.27082	TRUE	3.25283e-28	2.12127	TRUE	FALSE	FALSE	3.11924e-26	2.00948	TRUE	9.94511e-38	2.43097	TRUE
Chr_1	1439709	1439910	-	202	XUT0128	0.0172002	1.91553	TRUE	0.00010956	3.22201	TRUE	FALSE	FALSE	0.0133442	2.15774	TRUE	0.0150069	2.08385	TRUE
Chr_1	1449380	1449598	-	219	XUT0129	0.00121936	2.22442	TRUE	2.87549e-06	3.1033	TRUE	FALSE	FALSE	0.0149361	1.46083	TRUE	0.161679	0.897066	FALSE
Chr_1	1450492	1450713	-	222	XUT0130	0.00180323	1.64924	TRUE	0.000471597	1.99316	TRUE	FALSE	FALSE	2.24543e-11	2.2896	TRUE	3.93951e-08	1.97504	TRUE
Chr_1	1455965	1456410	+	446	XUT0131	0.875917	0.15363	FALSE	0.0317452	1.4924	TRUE	TRUE	FALSE	0.917073	0.074435	FALSE	0.221066	0.327011	FALSE
Chr_1	1462970	1463521	-	552	XUT0132	6.67475e-10	1.91249	TRUE	1.12367e-25	3.43669	TRUE	FALSE	FALSE	1.67156e-08	1.75568	TRUE	1.16244e-07	1.69247	TRUE
Chr_1	1467993	1468759	-	767	XUT0133	0.565794	0.333834	FALSE	7.67058e-06	1.80666	TRUE	FALSE	FALSE	0.953239	-0.0684424	FALSE	0.183402	-0.606256	FALSE
Chr_1	1487595	1488071	+	477	XUT0134	0.468578	0.248974	FALSE	9.38252e-09	1.73148	TRUE	FALSE	FALSE	0.913009	0.0853054	FALSE	0.389956	-0.257343	FALSE
Chr_1	1503657	1506325	+	2669	XUT0135	2.21272e-16	1.59102	TRUE	1.9973e-21	2.09294	TRUE	FALSE	FALSE	4.04204e-26	2.04632	TRUE	5.11657e-27	2.10658	TRUE
Chr_1	1507985	1508298	-	314	XUT0136	0.123655	1.25911	FALSE	0.0929748	1.275	FALSE	FALSE	FALSE	0.189869	1.1941	FALSE	0.000387162	2.50244	TRUE
Chr_1	1510528	1511112	-	585	XUT0137	0.126852	0.722651	FALSE	0.000530042	1.55176	TRUE	FALSE	FALSE	0.814897	0.303289	FALSE	0.00302149	1.48773	TRUE
Chr_1	1525779	1527179	+	1401	XUT0138	2.35945e-07	1.14331	TRUE	8.20393e-10	1.52433	TRUE	FALSE	FALSE	0.000131716	1.01057	TRUE	2.29073e-13	1.82164	TRUE
Chr_1	1527588	1529311	+	1724	XUT0139	2.80541e-20	2.3298	TRUE	6.57391e-19	2.51283	TRUE	FALSE	FALSE	4.99364e-14	1.97334	TRUE	1.1809e-23	2.5979	TRUE
Chr_1	1539915	1541488	+	1574	XUT0140	3.16132e-12	1.78871	TRUE	2.80525e-17	2.39532	TRUE	FALSE	FALSE	4.43901e-62	3.33104	TRUE	1.01443e-58	3.26085	TRUE
Chr_1	1546604	1547926	-	1323	XUT0141	0.00549965	0.599635	FALSE	8.28959e-12	1.57812	TRUE	FALSE	FALSE	0.374971	0.291299	FALSE	0.00721619	0.605795	FALSE
Chr_1	1549334	1549934	-	601	XUT0142	0.00180396	1.71754	TRUE	1.74036e-05	2.46301	TRUE	FALSE	FALSE	0.143921	1.16663	FALSE	0.00159936	2.05303	TRUE
Chr_1	1553501	1554353	-	853	XUT0143	5.00193e-05	1.84426	TRUE	2.24909e-08	2.73209	TRUE	FALSE	FALSE	1.76522e-05	1.91004	TRUE	9.98353e-06	1.98253	TRUE
Chr_1	1569544	1570103	+	560	XUT0144	0.403073	0.542901	FALSE	0.000294206	2.13996	TRUE	FALSE	FALSE	0.656993	0.675726	FALSE	0.572205	0.5359	FALSE
Chr_1	1574024	1574597	+	574	XUT0145	0.56528	-0.567269	FALSE	0.00505446	1.91549	TRUE	FALSE	FALSE	0.712432	0.670276	FALSE	0.683756	0.426221	FALSE
Chr_1	1585063	1585745	-	683	XUT0146	1.28962e-06	0.880106	FALSE	1.23046e-10	1.36237	TRUE	FALSE	FALSE	0.00119443	0.688471	FALSE	1.49765e-05	0.885962	FALSE
Chr_1	1593593	1593969	+	377	XUT0147	0.322904	0.691984	FALSE	7.69113e-05	2.23729	TRUE	FALSE	FALSE	0.666188	0.467558	FALSE	0.623898	-0.320029	FALSE
Chr_1	1596484	1596998	-	515	XUT0148	9.7503e-05	2.47171	TRUE	1.14782e-05	2.88128	TRUE	FALSE	FALSE	0.00136554	1.79469	TRUE	0.0404725	1.21354	TRUE
Chr_1	1597032	1598034	-	1003	XUT0149	7.55787e-08	2.35212	TRUE	2.15894e-09	2.7643	TRUE	FALSE	FALSE	3.14553e-06	1.67595	TRUE	0.00372571	1.12742	TRUE
Chr_1	1601566	1602242	-	677	XUT0150	0.00947003	1.91636	TRUE	0.000104162	2.92313	TRUE	FALSE	FALSE	0.0721618	1.30083	FALSE	0.372132	0.68153	FALSE
Chr_1	1621652	1621876	-	225	XUT0151	0.114746	1.19862	FALSE	0.00236467	2.24381	TRUE	FALSE	FALSE	0.8318	-0.397418	FALSE	0.145499	-1.29352	FALSE
Chr_1	1650955	1651241	+	287	XUT0152	0.229952	0.955084	FALSE	0.0170963	1.57774	TRUE	FALSE	FALSE	0.047604	1.79163	TRUE	0.0101719	2.16014	TRUE
Chr_1	1673900	1674429	+	530	XUT0153	0.141131	0.946364	FALSE	0.00236792	1.84858	TRUE	FALSE	FALSE	0.0871971	1.59955	FALSE	0.169591	1.17662	FALSE
Chr_1	1674838	1675177	+	340	XUT0154	1	0.879522	FALSE	0.260234	1.03867	FALSE	FALSE	FALSE	0.750177	-0.74368	FALSE	0.99734	0.00235153	FALSE
Chr_1	1697704	1699496	-	1793	XUT0155	3.4341e-24	2.25609	TRUE	2.97284e-13	1.91236	TRUE	FALSE	FALSE	2.07711e-23	2.58384	TRUE	6.72702e-24	2.63247	TRUE
Chr_1	1700736	1701029	+	294	XUT0156	0.758145	-0.524977	FALSE	0.0187235	1.55764	TRUE	FALSE	FALSE	0.634345	-1.58388	FALSE	1	-1.58388	FALSE
Chr_1	1707042	1708425	-	1384	XUT0157	6.15745e-12	1.87263	TRUE	1.0819e-18	2.62569	TRUE	TRUE	FALSE	4.13826e-17	1.84659	TRUE	1.84468e-16	1.84458	TRUE
Chr_1	1716851	1717424	+	574	XUT0158	0.00187523	1.74106	TRUE	1.04828e-05	2.4775	TRUE	FALSE	FALSE	0.00392202	1.28833	TRUE	0.0391901	0.953918	FALSE
Chr_1	1724218	1726556	-	2339	XUT0159	7.41033e-20	3.11174	TRUE	4.1116e-28	3.97288	TRUE	FALSE	FALSE	1.55872e-12	2.40418	TRUE	3.45544e-15	2.68863	TRUE
Chr_1	1727011	1728205	-	1195	XUT0160	2.74929e-07	1.6178	TRUE	1.08255e-06	1.71231	TRUE	FALSE	FALSE	1.25942e-06	1.26416	TRUE	7.27196e-07	1.31355	TRUE
Chr_1	1741834	1743637	-	1804	XUT0161	7.30274e-20	2.66959	TRUE	2.71747e-09	2.01056	TRUE	FALSE	FALSE	3.02644e-38	3.37788	TRUE	5.83337e-32	3.12558	TRUE
Chr_1	1751872	1752713	-	842	XUT0162	0.031077	1.03936	TRUE	2.50333e-07	2.31016	TRUE	FALSE	FALSE	0.118717	1.16668	FALSE	0.00555277	1.78108	TRUE
Chr_1	1762932	1763524	+	593	XUT0163	6.24934e-08	2.5588	TRUE	2.80337e-06	2.41965	TRUE	TRUE	FALSE	5.48347e-09	2.05409	TRUE	4.76897e-07	1.83001	TRUE
Chr_1	1781176	1782068	+	893	XUT0164	1.22529e-05	1.60897	TRUE	1.16951e-06	1.93161	TRUE	FALSE	FALSE	0.000306488	1.49728	TRUE	2.73838e-07	2.05079	TRUE
Chr_1	1796696	1797102	+	407	XUT0165	0.963572	0.0305292	FALSE	0.00020719	-1.70924	FALSE	FALSE	FALSE	0.438959	-0.260926	FALSE	0.000859721	-0.71912	FALSE
Chr_1	1799297	1799539	-	243	XUT0166	0.166291	0.818477	FALSE	0.10923	0.964546	FALSE	FALSE	FALSE	0.468942	0.802429	FALSE	0.216456	-1.01003	FALSE
Chr_1	1804465	1805376	+	912	XUT0167	4.88018e-11	2.9311	TRUE	4.69833e-07	2.45759	TRUE	FALSE	FALSE	5.05532e-15	2.75833	TRUE	1.10678e-13	2.66441	TRUE
Chr_1	1805399	1806097	+	699	XUT0168	0.00178519	1.62985	TRUE	1.64601e-06	2.44204	TRUE	FALSE	FALSE	2.2944e-05	2.54251	TRUE	0.00391589	1.8282	TRUE
Chr_1	1815937	1816484	-	548	XUT0169	0.000487298	2.01155	TRUE	5.62067e-06	2.70506	TRUE	FALSE	FALSE	2.34399e-07	3.36828	TRUE	8.93835e-05	2.62374	TRUE
Chr_1	1827414	1828008	+	595	XUT0170	2.12979e-10	2.98115	TRUE	1.70005e-09	2.99912	TRUE	TRUE	FALSE	5.31585e-28	3.27533	TRUE	8.24154e-20	2.79991	TRUE
Chr_1	1851143	1852893	-	1751	XUT0171	3.85911e-48	3.30464	TRUE	5.93967e-25	2.71597	TRUE	FALSE	FALSE	4.63663e-59	3.12704	TRUE	3.32657e-60	3.18793	TRUE
Chr_1	1871659	1871963	-	305	XUT0172	0.544571	0.318734	FALSE	0.00338681	1.39916	TRUE	FALSE	FALSE	0.855537	-0.142565	FALSE	0.112674	-0.537986	FALSE
Chr_1	1901037	1902602	-	1566	XUT0173	1.40243e-05	0.904647	FALSE	3.54896e-11	1.49504	TRUE	FALSE	FALSE	0.0013692	0.864751	FALSE	0.000162882	0.991269	FALSE
Chr_1	1906168	1906963	+	796	XUT0174	2.14842e-17	1.99044	TRUE	1.44514e-22	2.61655	TRUE	FALSE	FALSE	1.29597e-10	2.07304	TRUE	4.69199e-37	3.93225	TRUE
Chr_1	1918422	1919051	-	630	XUT0175	0.00145596	1.69841	TRUE	7.69315e-08	2.86803	TRUE	FALSE	FALSE	0.00266549	1.90119	TRUE	0.0012335	2.01007	TRUE
Chr_1	1924840	1926746	-	1907	XUT0176	4.17312e-05	0.546447	FALSE	6.43118e-24	1.51263	TRUE	TRUE	FALSE	0.347536	-0.204796	FALSE	0.00125665	-0.4864	FALSE
Chr_1	1957722	1958049	+	328	XUT0177	1	1.3515	FALSE	0.0321693	1.69445	TRUE	FALSE	FALSE	0.256723	1.9388	FALSE	0.784057	0.307908	FALSE
Chr_1	1964168	1965265	+	1098	XUT0178	5.87365e-16	1.93903	TRUE	1.00961e-19	2.48646	TRUE	TRUE	FALSE	1.79311e-24	1.76928	TRUE	6.27862e-21	1.64562	TRUE
Chr_1	2003687	2004337	+	651	XUT0179	0.0153575	1.24516	TRUE	7.46617e-11	3.07643	TRUE	FALSE	FALSE	0.0168032	1.39589	TRUE	0.0065805	1.52669	TRUE
Chr_1	2009482	2010054	+	573	XUT0180	6.17258e-18	1.62373	TRUE	4.50185e-37	2.69202	TRUE	FALSE	FALSE	1.44754e-13	1.25232	TRUE	4.49429e-08	0.966784	FALSE
Chr_1	2014985	2016139	+	1155	XUT0181	1.82278e-07	2.0124	TRUE	2.08174e-12	2.90799	TRUE	FALSE	FALSE	2.94128e-07	2.19711	TRUE	0.000251421	1.66665	TRUE
Chr_1	2034617	2034924	-	308	XUT0182	0.934054	-0.0265752	FALSE	2.53989e-24	5.24984	TRUE	FALSE	FALSE	0.128224	1.68198	FALSE	0.643608	0.545838	FALSE
Chr_1	2044167	2045029	+	863	XUT0183	0.0419464	1.23284	TRUE	3.01968e-15	4.00584	TRUE	FALSE	FALSE	0.0153164	1.58299	TRUE	0.0582702	1.24343	FALSE
Chr_1	2045351	2045864	-	514	XUT0184	0.00100979	1.72	TRUE	5.75636e-19	4.29276	TRUE	TRUE	FALSE	0.0739271	1.22676	FALSE	0.0373819	1.2973	TRUE
Chr_1	2105874	2106290	+	417	XUT0185	0.00361178	1.57548	TRUE	4.57615e-06	2.46637	TRUE	FALSE	FALSE	0.00102185	1.90299	TRUE	0.0203565	1.39792	TRUE
Chr_1	2114122	2114487	-	366	XUT0186	0.060357	1.29311	FALSE	3.6507e-07	3.27557	TRUE	FALSE	FALSE	0.000828117	2.5645	TRUE	0.00488567	2.19335	TRUE
Chr_1	2121862	2123095	+	1234	XUT0187	0.231377	0.435353	FALSE	5.90473e-25	2.87902	TRUE	FALSE	FALSE	0.851944	-0.136634	FALSE	0.855257	0.0835763	FALSE
Chr_1	2129429	2129814	+	386	XUT0188	0.0177993	1.37461	TRUE	0.0196368	1.38619	TRUE	FALSE	FALSE	0.949865	-0.125133	FALSE	0.687953	0.274351	FALSE
Chr_1	2134262	2134738	+	477	XUT0189	0.0290615	1.77859	TRUE	0.0885985	1.27403	FALSE	FALSE	FALSE	0.00610159	2.39542	TRUE	0.00192489	2.69112	TRUE
Chr_1	2153604	2156870	-	3267	XUT0190	7.1579e-45	2.06501	TRUE	6.41722e-64	2.886	TRUE	TRUE	FALSE	2.94225e-27	1.74438	TRUE	6.0526e-25	1.6767	TRUE
Chr_1	2164453	2165154	-	702	XUT0191	1.13353e-07	1.04385	TRUE	3.61176e-11	1.4725	TRUE	FALSE	FALSE	0.13338	0.553405	FALSE	4.93021e-10	1.7416	TRUE
Chr_1	2170392	2170639	-	248	XUT0192	0.376939	0.696672	FALSE	0.00226236	2.52665	TRUE	FALSE	FALSE	0.801814	-0.999187	FALSE	1	-0.999187	FALSE
Chr_1	2178373	2179245	+	873	XUT0193	2.21716e-09	3.07384	TRUE	6.46641e-17	4.32644	TRUE	FALSE	FALSE	1.31551e-09	2.04817	TRUE	2.25153e-13	2.47521	TRUE
Chr_1	2206049	2208098	+	2050	XUT0194	4.64483e-17	2.49512	TRUE	7.83194e-13	2.40269	TRUE	FALSE	FALSE	1.65576e-37	2.76787	TRUE	1.38311e-28	2.45141	TRUE
Chr_1	2209401	2209852	-	452	XUT0195	2.84674e-06	1.52103	TRUE	1.19731e-11	2.34478	TRUE	TRUE	FALSE	3.56443e-05	1.31369	TRUE	4.99974e-06	1.44906	TRUE
Chr_1	2241430	2241754	+	325	XUT0196	0.814209	0.248844	FALSE	0.026108	1.27863	TRUE	FALSE	FALSE	0.0161594	1.96296	TRUE	0.0520767	1.5925	FALSE
Chr_1	2248581	2248850	+	270	XUT0197	0.067861	1.62033	FALSE	5.2306e-08	4.54689	TRUE	FALSE	FALSE	0.239548	1.13669	FALSE	0.0739677	1.43849	FALSE
Chr_1	2261791	2262403	-	613	XUT0198	0.00138394	1.21294	TRUE	1.43269e-18	3.08828	TRUE	FALSE	FALSE	0.0677863	0.91014	FALSE	0.288109	0.516369	FALSE
Chr_1	2276020	2276238	+	219	XUT0199	0.080522	1.47443	FALSE	0.00710411	2.11665	TRUE	FALSE	FALSE	0.0150474	2.25686	TRUE	0.0097629	2.31832	TRUE
Chr_1	2307137	2307405	+	269	XUT0200	0.93316	0.000164859	FALSE	0.00999223	2.09607	TRUE	FALSE	FALSE	0.858135	0.505493	FALSE	0.363441	1.26151	FALSE
Chr_1	2307447	2307862	+	416	XUT0201	0.566339	0.499534	FALSE	0.0634776	1.42072	FALSE	FALSE	FALSE	0.391081	1.25718	FALSE	0.938505	0.111869	FALSE
Chr_1	2323355	2324575	-	1221	XUT0202	3.78685e-09	2.24288	TRUE	5.01587e-18	3.41876	TRUE	FALSE	FALSE	7.59095e-10	2.0471	TRUE	1.98953e-10	2.15035	TRUE
Chr_1	2324799	2325999	+	1201	XUT0203	3.00126e-99	2.98487	TRUE	1.70854e-40	2.28652	TRUE	TRUE	FALSE	1.13186e-68	2.80349	TRUE	2.62255e-52	2.45223	TRUE
Chr_1	2331137	2331691	-	555	XUT0204	0.000295814	1.54909	TRUE	6.37088e-10	2.7219	TRUE	FALSE	FALSE	0.22703	0.676511	FALSE	0.637715	0.253521	FALSE
Chr_1	2332750	2333001	-	252	XUT0205	0.0170135	1.67873	TRUE	1.77251e-05	3.22891	TRUE	FALSE	FALSE	0.0140728	2.1106	TRUE	0.0152765	2.02958	TRUE
Chr_1	2349666	2350159	-	494	XUT0206	0.966213	-0.0196386	FALSE	0.526195	0.468689	FALSE	FALSE	FALSE	NA	NA	NA	NA	NA	NA
Chr_1	2351019	2352753	+	1735	XUT0207	1.61679e-16	1.893	TRUE	1.11376e-17	2.25073	TRUE	TRUE	FALSE	6.8647e-10	1.43739	TRUE	1.04092e-08	1.36482	TRUE
Chr_1	2397741	2398014	-	274	XUT0208	0.921428	0.028541	FALSE	0.00291242	1.25317	TRUE	FALSE	FALSE	0.2446	-0.478873	FALSE	0.511198	-0.243658	FALSE
Chr_1	2405879	2407767	+	1889	XUT0209	5.71256e-64	2.98324	TRUE	1.03055e-36	2.64573	TRUE	TRUE	FALSE	7.33258e-58	2.89516	TRUE	1.68687e-50	2.71927	TRUE
Chr_1	2412990	2413755	-	766	XUT0210	4.39233e-35	3.41917	TRUE	1.07151e-28	3.41075	TRUE	FALSE	FALSE	1.05677e-42	2.96085	TRUE	1.69173e-36	2.76251	TRUE
Chr_1	2421082	2421553	-	472	XUT0211	5.74818e-05	2.26855	TRUE	7.99636e-06	2.64674	TRUE	TRUE	FALSE	0.00285481	1.16003	TRUE	0.41058	0.383546	FALSE
Chr_1	2446081	2448946	+	2866	XUT0212	3.1994e-07	1.10281	TRUE	6.82332e-29	2.5527	TRUE	FALSE	FALSE	0.00608229	0.621693	FALSE	0.00450364	0.62679	FALSE
Chr_1	2461125	2462795	+	1671	XUT0213	1.60221e-19	2.06521	TRUE	4.24291e-18	2.28996	TRUE	FALSE	FALSE	8.51636e-29	2.07455	TRUE	1.69442e-32	2.22931	TRUE
Chr_1	2495795	2496037	-	243	XUT0214	0.118408	1.24879	FALSE	0.0388059	1.51392	TRUE	FALSE	FALSE	0.62521	0.710926	FALSE	0.518772	0.596861	FALSE
Chr_1	2543696	2543914	-	219	XUT0215	0.0599339	1.29076	FALSE	2.61353e-05	2.89299	TRUE	FALSE	FALSE	0.631561	0.567816	FALSE	0.387091	0.642555	FALSE
Chr_1	2555369	2555715	-	347	XUT0216	0.0487564	0.987937	FALSE	1.47619e-18	3.86552	TRUE	FALSE	FALSE	0.838179	0.341381	FALSE	0.277541	-0.807304	FALSE
Chr_1	2563461	2563826	-	366	XUT0217	0.147649	1.20678	FALSE	0.00502313	2.1101	TRUE	FALSE	FALSE	0.944844	-0.202315	FALSE	0.444293	1.03801	FALSE
Chr_1	2576885	2577239	+	355	XUT0219	0.0440783	1.02104	TRUE	0.000184247	1.80046	TRUE	FALSE	FALSE	0.988732	-0.0175492	FALSE	0.218245	0.570727	FALSE
Chr_1	2586574	2586952	+	379	XUT0220	0.0599339	0.958922	FALSE	8.51498e-06	2.17334	TRUE	FALSE	FALSE	0.928681	-0.166821	FALSE	0.63648	0.36477	FALSE
Chr_1	2587224	2589184	+	1961	XUT0221	8.68063e-23	2.36836	TRUE	2.50145e-35	3.32947	TRUE	FALSE	FALSE	2.1043e-56	2.21985	TRUE	2.0177e-42	1.94245	TRUE
Chr_1	2632201	2632681	+	481	XUT0222	0.00913866	1.49233	TRUE	2.88311e-06	2.88615	TRUE	FALSE	FALSE	0.491778	0.568957	FALSE	0.532777	0.36414	FALSE
Chr_1	2632825	2633092	+	268	XUT0223	1	-0.38798	FALSE	0.140987	1.54295	FALSE	FALSE	FALSE	0.812586	0.633823	FALSE	0.426051	1.06361	FALSE
Chr_1	2650680	2651695	+	1016	XUT0224	2.9256e-25	2.23109	TRUE	2.38741e-14	1.93785	TRUE	TRUE	FALSE	1.73797e-49	2.71991	TRUE	1.33066e-37	2.39727	TRUE
Chr_1	2658254	2658531	+	278	XUT0225	0.881095	0.272202	FALSE	0.000327792	2.35401	TRUE	FALSE	FALSE	0.257545	1.23379	FALSE	0.0128641	2.15111	TRUE
Chr_1	2676236	2676637	-	402	XUT0226	0.00797219	1.96536	TRUE	4.28444e-08	4.15656	TRUE	FALSE	FALSE	0.544425	1.07426	FALSE	0.164647	1.64861	FALSE
Chr_1	2677868	2679795	+	1928	XUT0227	7.59155e-19	2.35002	TRUE	4.05951e-34	3.44102	TRUE	FALSE	FALSE	2.24895e-16	2.14686	TRUE	2.65986e-12	1.88609	TRUE
Chr_1	2707219	2707657	+	439	XUT0228	0.00789772	1.64712	TRUE	2.31858e-08	3.82691	TRUE	FALSE	FALSE	0.592564	0.753969	FALSE	0.232833	1.03054	FALSE
Chr_1	2709725	2710106	+	382	XUT0229	0.0449114	0.80666	FALSE	4.77926e-10	2.33753	TRUE	TRUE	FALSE	0.88367	0.174948	FALSE	0.0757332	0.797136	FALSE
Chr_1	2720669	2721056	-	388	XUT0230	7.38124e-07	1.33106	TRUE	2.00802e-10	1.89669	TRUE	FALSE	FALSE	1.23122e-07	1.24188	TRUE	0.00141999	0.810134	FALSE
Chr_1	2727587	2727976	-	390	XUT0231	0.36567	0.602773	FALSE	0.100009	0.934231	FALSE	FALSE	FALSE	0.996551	-0.00181716	FALSE	0.0455369	0.93504	FALSE
Chr_1	2786157	2786541	-	385	XUT0232	0.0466673	1.07423	TRUE	0.0154727	1.34475	TRUE	FALSE	FALSE	0.388212	0.6642	FALSE	0.0623712	1.0364	FALSE
Chr_1	2797031	2797322	-	292	XUT0233	0.0014194	2.3584	TRUE	2.61871e-06	3.65364	TRUE	FALSE	FALSE	0.464477	1.1255	FALSE	0.576079	0.623148	FALSE
Chr_1	2799227	2799524	+	298	XUT0234	0.0829546	1.22341	FALSE	0.00232896	2.23722	TRUE	TRUE	FALSE	0.609948	0.65005	FALSE	0.0531778	-1.65349	FALSE
Chr_1	2812715	2813842	+	1128	XUT0235	7.01278e-06	1.38106	TRUE	5.32742e-07	1.77105	TRUE	FALSE	FALSE	0.00279231	1.41971	TRUE	4.49629e-09	2.54811	TRUE
Chr_1	2819027	2820776	+	1750	XUT0236	1.4786e-28	2.68345	TRUE	4.9752e-16	2.28749	TRUE	FALSE	FALSE	1.39314e-23	2.56847	TRUE	3.18547e-19	2.33863	TRUE
Chr_1	2827149	2827375	+	227	XUT0237	1	0.413159	FALSE	0.85694	-0.378976	FALSE	FALSE	FALSE	0.874886	-0.676627	FALSE	1	-0.676627	FALSE
Chr_1	2829706	2830521	-	816	XUT0238	0.000271028	1.72065	TRUE	2.55759e-06	2.28545	TRUE	FALSE	FALSE	0.230408	0.840394	FALSE	0.013182	1.35348	TRUE
Chr_1	2842808	2843133	-	326	XUT0239	0.0332316	1.65464	TRUE	2.64305e-07	4.15996	TRUE	FALSE	FALSE	0.416924	1.2434	FALSE	0.471598	0.831349	FALSE
Chr_1	2844467	2845377	-	911	XUT0240	4.22865e-08	1.05769	TRUE	3.10936e-14	1.63438	TRUE	TRUE	FALSE	0.00148728	0.640559	FALSE	0.0236087	0.46625	FALSE
Chr_1	2844745	2845494	+	750	XUT0241	1.49206e-14	1.35939	TRUE	5.38056e-21	1.88992	TRUE	TRUE	FALSE	0.00018346	0.864366	FALSE	0.00184565	0.731323	FALSE
Chr_1	2845688	2846908	+	1221	XUT0242	0.0182921	0.577371	FALSE	3.3039e-08	1.3522	TRUE	FALSE	FALSE	0.263222	0.438505	FALSE	0.000203793	1.04825	TRUE
Chr_1	2845801	2846177	-	377	XUT0243	0.28001	0.692677	FALSE	7.37871e-05	2.4753	TRUE	FALSE	FALSE	0.35813	0.937463	FALSE	0.683229	0.377378	FALSE
Chr_1	2857836	2858647	+	812	XUT0244	0.000279765	2.1985	TRUE	1.00505e-09	3.60164	TRUE	FALSE	FALSE	9.06826e-10	2.52556	TRUE	6.54858e-09	2.45301	TRUE
Chr_1	2859196	2859739	+	544	XUT0245	8.80477e-07	2.45437	TRUE	2.63232e-10	3.23485	TRUE	FALSE	FALSE	0.00957308	1.04402	TRUE	0.0280629	0.882976	FALSE
Chr_1	2865322	2865705	+	384	XUT0246	0.337597	0.439642	FALSE	0.00704471	1.09786	TRUE	FALSE	FALSE	0.709976	0.362005	FALSE	0.542793	0.330206	FALSE
Chr_1	2877761	2878316	+	556	XUT0247	6.51761e-19	2.30366	TRUE	5.03963e-43	3.7609	TRUE	TRUE	FALSE	2.17549e-22	2.21042	TRUE	2.15258e-19	2.09203	TRUE
Chr_1	2893783	2894587	-	805	XUT0248	1.38305e-07	2.0666	TRUE	2.48825e-08	2.34225	TRUE	TRUE	FALSE	1.10549e-06	1.59915	TRUE	2.69798e-07	1.71289	TRUE
Chr_1	2907536	2908032	-	497	XUT0249	0.788348	0.219657	FALSE	0.0198044	1.36032	TRUE	FALSE	FALSE	0.375316	1.70567	FALSE	1	0.559287	FALSE
Chr_1	2908991	2909606	+	616	XUT0250	0.0312936	-0.372528	FALSE	1.87201e-155	4.63831	TRUE	TRUE	FALSE	0.999463	0.00145715	FALSE	0.00600097	0.686098	FALSE
Chr_1	2918037	2919119	-	1083	XUT0251	7.51846e-11	2.43547	TRUE	1.48961e-31	4.39635	TRUE	FALSE	FALSE	5.79187e-11	2.46498	TRUE	6.79143e-08	2.1076	TRUE
Chr_1	2951245	2952786	-	1542	XUT0253	4.61817e-31	2.35387	TRUE	1.58648e-68	3.87946	TRUE	TRUE	FALSE	1.6489e-27	2.2315	TRUE	1.48745e-25	2.16912	TRUE
Chr_1	2966361	2967030	-	670	XUT0254	0.000492895	1.44919	TRUE	3.92735e-09	2.48354	TRUE	FALSE	FALSE	1.6114e-07	1.8517	TRUE	1.27728e-08	2.03192	TRUE
Chr_2	1155	2743	+	1589	XUT0255	9.64148e-101	3.22802	TRUE	5.70655e-26	1.96024	TRUE	FALSE	FALSE	3.04906e-108	3.07928	TRUE	9.22761e-69	2.4601	TRUE
Chr_2	4156	4356	+	201	XUT0256	0.383622	0.687883	FALSE	0.726112	0.309703	FALSE	FALSE	FALSE	0.687807	0.583054	FALSE	0.922084	0.121679	FALSE
Chr_2	5432	5637	-	206	XUT0257	0.621413	0.329716	FALSE	0.111612	1.25154	FALSE	FALSE	FALSE	0.797359	0.981617	FALSE	1	0	FALSE
Chr_2	6240	6459	+	220	XUT0258	0.60237	-0.506702	FALSE	0.24202	0.913748	FALSE	FALSE	FALSE	0.883464	0.608475	FALSE	0.645783	-0.776646	FALSE
Chr_2	12670	13093	-	424	XUT0259	0.636409	0.0921582	FALSE	0.16138	0.229701	FALSE	TRUE	FALSE	0.191321	-0.276228	FALSE	2.22508e-06	-0.758657	FALSE
Chr_2	14427	14791	+	365	XUT0260	0.132018	1.04394	FALSE	0.0969939	1.14043	FALSE	FALSE	FALSE	0.0215832	1.86041	TRUE	0.0237901	1.79463	TRUE
Chr_2	39898	40629	+	732	XUT0262	0.374132	0.592035	FALSE	0.0144973	1.3209	TRUE	FALSE	FALSE	0.00599707	1.45096	TRUE	0.0269633	1.16953	TRUE
Chr_2	45806	46331	-	526	XUT0263	0.662379	0.345232	FALSE	0.0175053	1.78534	TRUE	FALSE	FALSE	0.771889	-0.870821	FALSE	0.37094	-1.27867	FALSE
Chr_2	45926	46457	+	532	XUT0264	0.804249	0.292968	FALSE	4.98353e-08	2.5764	TRUE	FALSE	FALSE	0.0506006	1.27333	FALSE	0.194424	0.856901	FALSE
Chr_2	46596	47033	+	438	XUT0265	0.420485	0.862982	FALSE	1.37178e-05	3.52708	TRUE	FALSE	FALSE	0.865753	-0.478421	FALSE	0.573971	-0.775288	FALSE
Chr_2	47094	47466	+	373	XUT0266	0.806163	0.333289	FALSE	0.000225124	2.90159	TRUE	FALSE	FALSE	0.920811	0.393786	FALSE	0.851916	-0.347978	FALSE
Chr_2	49514	50206	-	693	XUT0267	0.081239	0.966098	FALSE	2.08745e-10	3.19168	TRUE	FALSE	FALSE	0.674613	0.457847	FALSE	0.744862	-0.201196	FALSE
Chr_2	83035	83599	-	565	XUT0268	0.00202258	1.72437	TRUE	1.76203e-12	3.73478	TRUE	TRUE	FALSE	0.00598546	1.5698	TRUE	0.0913266	1.00401	FALSE
Chr_2	104517	105652	-	1136	XUT0269	6.23082e-25	2.0529	TRUE	1.00243e-29	2.53294	TRUE	TRUE	FALSE	5.26532e-14	1.3759	TRUE	3.03991e-09	1.12275	TRUE
Chr_2	138340	139022	+	683	XUT0270	0.584579	0.234544	FALSE	7.32868e-15	2.26928	TRUE	TRUE	FALSE	0.571321	0.253006	FALSE	0.899161	-0.0421807	FALSE
Chr_2	139978	140806	-	829	XUT0271	0.000869043	1.3704	TRUE	9.6661e-19	3.77574	TRUE	FALSE	FALSE	0.028877	1.11221	TRUE	0.00537065	1.32021	TRUE
Chr_2	140989	141374	-	386	XUT0272	6.73793e-06	2.21627	TRUE	3.74601e-14	3.73822	TRUE	FALSE	FALSE	0.0871971	0.987591	FALSE	0.0194237	1.19241	TRUE
Chr_2	143336	144158	+	823	XUT0273	7.43649e-05	0.719294	FALSE	7.10411e-25	2.01	TRUE	FALSE	FALSE	0.00636352	0.688749	FALSE	4.34095e-05	0.96832	FALSE
Chr_2	143940	144630	-	691	XUT0274	5.90701e-27	1.76847	TRUE	6.31157e-50	2.7538	TRUE	TRUE	FALSE	1.57665e-19	1.49609	TRUE	4.20606e-14	1.28156	TRUE
Chr_2	144172	145024	+	853	XUT0275	9.36657e-10	1.39647	TRUE	4.99371e-09	1.53629	TRUE	TRUE	FALSE	4.06082e-12	1.38618	TRUE	2.0785e-08	1.16488	TRUE
Chr_2	164752	165191	-	440	XUT0276	5.19772e-05	2.90688	TRUE	4.50574e-06	3.39672	TRUE	FALSE	FALSE	9.1342e-08	2.06785	TRUE	3.98832e-06	1.86221	TRUE
Chr_2	164886	165279	+	394	XUT0277	0.999165	0.000780334	FALSE	0.260606	0.981138	FALSE	FALSE	FALSE	0.983448	0.0125133	FALSE	0.0590658	-0.384041	FALSE
Chr_2	170720	171303	-	584	XUT0278	8.36185e-29	2.38465	TRUE	9.26354e-28	2.66833	TRUE	FALSE	FALSE	8.083e-32	2.37904	TRUE	4.56468e-22	1.9997	TRUE
Chr_2	199933	200160	-	228	XUT0279	0.019262	1.61807	TRUE	4.74252e-07	3.70729	TRUE	FALSE	FALSE	0.0294617	2.02516	TRUE	9.6741e-05	3.54293	TRUE
Chr_2	212294	212667	-	374	XUT0280	0.12297	1.25944	FALSE	0.0998217	1.30373	FALSE	FALSE	FALSE	0.81808	0.455788	FALSE	0.893843	-0.124279	FALSE
Chr_2	213561	213880	+	320	XUT0281	0.292991	0.676911	FALSE	1.04704e-07	3.67917	TRUE	FALSE	FALSE	0.0414138	1.90625	TRUE	0.110772	1.40794	FALSE
Chr_2	222642	223039	+	398	XUT0282	0.603245	0.391655	FALSE	2.15024e-09	2.99765	TRUE	FALSE	FALSE	0.834806	0.466534	FALSE	0.165886	1.32577	FALSE
Chr_2	224440	224802	-	363	XUT0283	0.00822164	1.72515	TRUE	0.00425892	1.83126	TRUE	FALSE	FALSE	0.38679	0.84402	FALSE	0.0876959	1.2013	FALSE
Chr_2	231433	232290	+	858	XUT0284	2.21455e-08	1.63569	TRUE	3.43086e-10	2.01975	TRUE	FALSE	FALSE	1.61725e-08	1.26087	TRUE	0.000781578	0.812467	FALSE
Chr_2	237478	237763	-	286	XUT0285	0.0770925	1.15905	FALSE	4.1333e-05	2.5715	TRUE	FALSE	FALSE	0.826714	0.54878	FALSE	0.629031	0.59021	FALSE
Chr_2	248601	249041	-	441	XUT0286	0.0506629	1.18333	FALSE	2.16372e-07	3.01633	TRUE	FALSE	FALSE	0.0346653	1.88051	TRUE	0.00906431	2.19491	TRUE
Chr_2	255015	257417	-	2403	XUT0288	6.39611e-28	2.04821	TRUE	2.65912e-58	3.42807	TRUE	TRUE	FALSE	1.29632e-26	1.95036	TRUE	6.08348e-24	1.86224	TRUE
Chr_2	331560	331764	+	205	XUT0289	0.220199	1.08007	FALSE	0.00076985	2.80214	TRUE	FALSE	FALSE	0.971259	0.125039	FALSE	0.844108	0.289129	FALSE
Chr_2	340787	341044	+	258	XUT0290	0.178598	0.881341	FALSE	1.7246e-05	2.54241	TRUE	FALSE	FALSE	0.504591	0.938856	FALSE	0.567394	-0.605518	FALSE
Chr_2	366331	367129	-	799	XUT0291	0.0043591	1.21739	TRUE	3.65278e-08	2.29758	TRUE	FALSE	FALSE	0.0493935	0.761196	FALSE	0.0499776	0.738004	FALSE
Chr_2	367260	368088	-	829	XUT0292	0.919466	-0.0172354	FALSE	1.53372e-19	1.7834	TRUE	TRUE	FALSE	0.0594802	-0.371969	FALSE	1.07928e-12	-1.16463	FALSE
Chr_2	371345	372483	-	1139	XUT0293	8.92308e-10	2.23555	TRUE	2.11148e-07	2.11793	TRUE	FALSE	FALSE	4.22139e-05	1.53172	TRUE	3.41638e-06	1.73802	TRUE
Chr_2	391449	391712	+	264	XUT0294	0.233647	1.07346	FALSE	3.57998e-06	3.17418	TRUE	FALSE	FALSE	0.216227	1.45809	FALSE	0.232462	1.17282	FALSE
Chr_2	393308	394117	+	810	XUT0295	0.0154689	1.03148	TRUE	1.56703e-13	2.92374	TRUE	FALSE	FALSE	0.000183944	1.53733	TRUE	0.0125003	1.09717	TRUE
Chr_2	397596	398092	+	497	XUT0296	0.00176707	1.46436	TRUE	0.000773507	1.68935	TRUE	FALSE	FALSE	0.00973619	1.53118	TRUE	0.0210327	1.3711	TRUE
Chr_2	413498	414361	-	864	XUT0297	6.98267e-05	1.25039	TRUE	1.18353e-08	1.90669	TRUE	FALSE	FALSE	2.71415e-05	1.14181	TRUE	0.00086254	0.954327	FALSE
Chr_2	418496	418822	+	327	XUT0298	0.083786	0.92435	FALSE	0.00403147	1.53354	TRUE	FALSE	FALSE	0.957048	0.108029	FALSE	0.389329	0.705045	FALSE
Chr_2	423631	425168	+	1538	XUT0299	2.63337e-14	2.02359	TRUE	2.19598e-08	1.72328	TRUE	FALSE	FALSE	1.47233e-17	2.28788	TRUE	5.1582e-24	2.71061	TRUE
Chr_2	458710	459873	+	1164	XUT0300	0.00125825	1.80882	TRUE	3.9537e-13	4.04425	TRUE	FALSE	FALSE	0.741327	0.457887	FALSE	0.185334	0.872212	FALSE
Chr_2	464693	465030	+	338	XUT0301	0.896428	0.335347	FALSE	0.00616832	2.24855	TRUE	FALSE	FALSE	0.88315	0.412187	FALSE	0.109557	1.79947	FALSE
Chr_2	466260	467162	+	903	XUT0302	5.25034e-34	2.18044	TRUE	9.44898e-26	2.21447	TRUE	FALSE	FALSE	1.2045e-31	2.01647	TRUE	8.61277e-26	1.83283	TRUE
Chr_2	473554	474000	+	447	XUT0303	0.00341163	1.81348	TRUE	0.000154281	2.47027	TRUE	FALSE	FALSE	0.0526364	1.11807	FALSE	0.00296025	1.55283	TRUE
Chr_2	479350	479676	-	327	XUT0304	0.105656	1.28748	FALSE	0.00168057	2.29529	TRUE	FALSE	FALSE	0.851944	-0.352221	FALSE	0.623006	0.458188	FALSE
Chr_2	486877	487519	+	643	XUT0305	0.00291197	1.2316	TRUE	3.88951e-06	2.12046	TRUE	FALSE	FALSE	0.015159	1.34182	TRUE	2.96304e-07	2.55728	TRUE
Chr_2	500916	501461	+	546	XUT0306	0.00458441	1.1309	TRUE	2.72859e-09	2.30542	TRUE	FALSE	FALSE	0.0720403	1.08033	FALSE	0.0469064	1.0844	TRUE
Chr_2	518050	518566	+	517	XUT0307	0.0071819	1.66393	TRUE	4.15229e-06	2.82235	TRUE	FALSE	FALSE	0.017499	1.49958	TRUE	0.0521731	1.23681	FALSE
Chr_2	518699	519004	-	306	XUT0308	0.0419109	1.08175	TRUE	2.79963e-05	2.09127	TRUE	FALSE	FALSE	0.803814	0.32379	FALSE	0.728925	0.245661	FALSE
Chr_2	521257	521954	+	698	XUT0309	0.00058079	1.49105	TRUE	0.000496924	1.60793	TRUE	TRUE	FALSE	0.0208435	1.26057	TRUE	0.0118044	1.30333	TRUE
Chr_2	524579	524818	-	240	XUT0310	0.281276	1.08713	FALSE	0.00128925	2.57756	TRUE	FALSE	FALSE	0.353612	1.23995	FALSE	0.3111	1.05551	FALSE
Chr_2	529427	530404	-	978	XUT0311	7.11321e-05	1.96895	TRUE	1.48381e-08	2.80895	TRUE	FALSE	FALSE	4.81674e-08	1.97086	TRUE	0.000113659	1.48124	TRUE
Chr_2	530421	530804	-	384	XUT0312	0.000468242	1.90655	TRUE	1.91655e-06	2.6399	TRUE	FALSE	FALSE	0.112146	1.03499	FALSE	0.417769	0.539963	FALSE
Chr_2	541577	541915	+	339	XUT0313	0.00435432	1.59942	TRUE	1.82729e-09	3.24249	TRUE	FALSE	FALSE	0.00150058	2.21484	TRUE	0.000225237	2.54402	TRUE
Chr_2	548319	550120	+	1802	XUT0314	5.88048e-66	2.723	TRUE	2.25726e-16	1.60492	TRUE	TRUE	FALSE	5.1549e-82	2.71549	TRUE	6.24162e-63	2.38947	TRUE
Chr_2	567781	569966	-	2186	XUT0315	1.39113e-39	2.94038	TRUE	3.46906e-36	3.16874	TRUE	FALSE	FALSE	3.11472e-29	2.4684	TRUE	9.63593e-24	2.24095	TRUE
Chr_2	571501	573192	+	1692	XUT0316	9.74058e-21	1.84886	TRUE	5.64767e-64	3.60647	TRUE	TRUE	FALSE	6.11889e-23	1.9957	TRUE	1.31689e-21	1.95793	TRUE
Chr_2	589366	591274	+	1909	XUT0317	4.50343e-23	2.45463	TRUE	2.54565e-19	2.53561	TRUE	FALSE	FALSE	4.12533e-46	2.60885	TRUE	7.63942e-43	2.55596	TRUE
Chr_2	611068	612724	+	1657	XUT0318	7.42086e-34	2.28142	TRUE	8.0488e-20	2.05198	TRUE	FALSE	FALSE	1.56743e-49	2.09595	TRUE	3.93082e-32	1.69944	TRUE
Chr_2	628124	628382	+	259	XUT0319	0.406976	0.897146	FALSE	0.0108146	2.10885	TRUE	FALSE	FALSE	0.807955	1.18725	FALSE	0.627041	1.19361	FALSE
Chr_2	628641	629014	+	374	XUT0320	0.120314	1.12394	FALSE	0.000274738	2.86106	TRUE	FALSE	FALSE	0.690247	0.999129	FALSE	0.615039	0.721705	FALSE
Chr_2	632686	632952	-	267	XUT0321	0.900289	0.0853453	FALSE	2.48488e-05	1.55414	TRUE	TRUE	FALSE	0.74916	-0.218798	FALSE	0.00166549	-1.07252	FALSE
Chr_2	636435	637232	+	798	XUT0322	0.000382054	1.06692	TRUE	4.36233e-22	2.81679	TRUE	FALSE	FALSE	5.16293e-06	1.26188	TRUE	0.00541364	0.839057	FALSE
Chr_2	666599	667482	-	884	XUT0323	0.00163462	1.70937	TRUE	4.47593e-13	3.96304	TRUE	FALSE	FALSE	0.00423947	1.62756	TRUE	0.00067252	1.87431	TRUE
Chr_2	711514	712611	-	1098	XUT0324	5.45299e-40	3.33079	TRUE	2.55936e-15	2.34739	TRUE	FALSE	FALSE	1.43831e-33	2.99488	TRUE	3.80648e-44	3.45595	TRUE
Chr_2	725359	726181	+	823	XUT0325	3.70154e-16	2.34076	TRUE	5.46684e-15	2.50944	TRUE	FALSE	FALSE	2.6586e-26	2.60298	TRUE	3.44841e-27	2.68665	TRUE
Chr_2	727443	729689	-	2247	XUT0326	2.06322e-57	2.67776	TRUE	1.23712e-39	2.65066	TRUE	TRUE	FALSE	1.32896e-57	2.57237	TRUE	4.71623e-50	2.40533	TRUE
Chr_2	727707	729578	+	1872	XUT0327	9.45251e-08	1.24033	TRUE	4.64787e-17	2.16273	TRUE	FALSE	FALSE	4.39996e-13	1.40424	TRUE	4.63301e-10	1.24187	TRUE
Chr_2	737383	738772	-	1390	XUT0328	2.05602e-07	1.76407	TRUE	1.5832e-08	2.1333	TRUE	FALSE	FALSE	9.3604e-06	1.19834	TRUE	0.000509414	0.985491	FALSE
Chr_2	741199	742166	-	968	XUT0329	0.0215383	1.00542	TRUE	0.0013906	1.35455	TRUE	TRUE	FALSE	0.0419985	0.706438	FALSE	0.266528	0.400967	FALSE
Chr_2	746395	746625	-	231	XUT0330	0.204395	1.09813	FALSE	9.34775e-07	3.86355	TRUE	FALSE	FALSE	0.940058	0.312022	FALSE	1	0	FALSE
Chr_2	753217	753982	-	766	XUT0331	9.30027e-05	2.10541	TRUE	1.15356e-06	2.7414	TRUE	FALSE	FALSE	0.00974735	1.43782	TRUE	0.0975487	0.950299	FALSE
Chr_2	755702	756937	+	1236	XUT0332	0.0166598	0.65049	FALSE	5.00055e-19	2.32318	TRUE	FALSE	FALSE	0.0565989	0.613708	FALSE	0.00268371	0.87243	FALSE
Chr_2	761467	761692	-	226	XUT0333	0.263469	0.998637	FALSE	0.00136309	2.29708	TRUE	FALSE	FALSE	0.639574	0.858424	FALSE	0.0269497	2.19269	TRUE
Chr_2	763290	763748	-	459	XUT0334	0.599107	0.40817	FALSE	0.00125378	1.42363	TRUE	TRUE	FALSE	0.81808	-0.266233	FALSE	0.656738	-0.263461	FALSE
Chr_2	763360	764035	+	676	XUT0335	0.139203	0.96589	FALSE	8.80589e-06	3.02078	TRUE	FALSE	FALSE	0.182177	1.07117	FALSE	0.10269	1.11698	FALSE
Chr_2	768447	768796	-	350	XUT0336	0.0145657	1.67423	TRUE	1.07771e-05	2.85044	TRUE	FALSE	FALSE	2.33871e-05	2.60264	TRUE	0.00601479	1.76319	TRUE
Chr_2	772232	773805	-	1574	XUT0337	1.29547e-41	1.92381	TRUE	2.14399e-32	2.01916	TRUE	TRUE	FALSE	9.53659e-26	1.88788	TRUE	9.6607e-29	2.00831	TRUE
Chr_2	784107	784914	+	808	XUT0338	1.26866e-07	1.5756	TRUE	8.85225e-10	2.00686	TRUE	FALSE	FALSE	3.55337e-11	1.69801	TRUE	1.07004e-07	1.42207	TRUE
Chr_2	789377	789622	-	246	XUT0339	0.0621564	1.46983	FALSE	0.000628787	2.62617	TRUE	FALSE	FALSE	0.431414	1.05897	FALSE	0.147471	1.34754	FALSE
Chr_2	800179	800576	+	398	XUT0340	0.0246556	1.15745	TRUE	0.00619444	1.4574	TRUE	FALSE	FALSE	0.652179	0.377377	FALSE	0.648677	0.258321	FALSE
Chr_2	801611	802216	-	606	XUT0341	0.000277803	2.24694	TRUE	2.50651e-07	3.17728	TRUE	FALSE	FALSE	1.61836e-08	3.23456	TRUE	1.38175e-06	2.83739	TRUE
Chr_2	849378	850031	-	654	XUT0342	0.053015	0.892987	FALSE	2.90472e-05	1.82844	TRUE	FALSE	FALSE	0.481515	0.549924	FALSE	0.155262	0.747493	FALSE
Chr_2	852685	853565	-	881	XUT0343	0.0192557	1.48929	TRUE	0.00968263	1.67382	TRUE	FALSE	FALSE	0.00993435	1.54411	TRUE	0.000601436	1.97193	TRUE
Chr_2	855568	856933	-	1366	XUT0344	1.69795e-13	1.44771	TRUE	1.03037e-05	1.05078	TRUE	TRUE	FALSE	1.14103e-13	1.28587	TRUE	6.04128e-17	1.46029	TRUE
Chr_2	860666	861016	-	351	XUT0345	0.948438	-0.000570729	FALSE	0.549345	0.347022	FALSE	FALSE	FALSE	0.995141	0.0175577	FALSE	0.248475	1.04905	FALSE
Chr_2	865612	867546	+	1935	XUT0346	7.48428e-83	3.09909	TRUE	8.71236e-61	3.10808	TRUE	TRUE	FALSE	4.51627e-60	2.8256	TRUE	9.96384e-62	2.87771	TRUE
Chr_2	898672	899939	+	1268	XUT0347	7.11976e-11	1.34661	TRUE	4.14132e-43	3.08711	TRUE	FALSE	FALSE	1.82825e-09	1.28018	TRUE	9.87237e-18	1.79374	TRUE
Chr_2	933585	933846	+	262	XUT0348	0.449508	0.714999	FALSE	0.00527082	2.19034	TRUE	FALSE	FALSE	0.645724	1.08059	FALSE	0.322858	1.41498	FALSE
Chr_2	937087	939900	-	2814	XUT0349	1.26588e-53	3.19959	TRUE	1.39449e-34	2.96108	TRUE	TRUE	FALSE	4.22899e-69	3.21423	TRUE	9.06578e-63	3.08433	TRUE
Chr_2	1023109	1023562	-	454	XUT0350	0.000258206	2.04097	TRUE	1.61051e-10	3.55252	TRUE	FALSE	FALSE	4.5608e-05	2.31416	TRUE	3.7682e-05	2.3523	TRUE
Chr_2	1033000	1033596	+	597	XUT0351	0.00661276	0.813068	FALSE	1.3752e-07	1.60643	TRUE	TRUE	FALSE	0.514868	0.40019	FALSE	0.336415	0.391956	FALSE
Chr_2	1035311	1037354	-	2044	XUT0352	3.17069e-120	3.03445	TRUE	9.12099e-66	2.72828	TRUE	TRUE	FALSE	1.63343e-91	2.61146	TRUE	9.94207e-77	2.39648	TRUE
Chr_2	1042563	1043723	+	1161	XUT0353	1.53673e-09	1.83221	TRUE	4.68924e-14	2.51779	TRUE	FALSE	FALSE	1.30754e-12	1.97779	TRUE	1.4559e-10	1.83649	TRUE
Chr_2	1044605	1044936	+	332	XUT0354	0.00462543	1.88277	TRUE	0.000165424	2.56894	TRUE	FALSE	FALSE	0.492072	0.716284	FALSE	0.517617	0.531689	FALSE
Chr_2	1071846	1072472	-	627	XUT0355	0.938854	0.0752756	FALSE	0.279046	0.696363	FALSE	TRUE	FALSE	6.93125e-26	2.03384	TRUE	5.00706e-46	2.73527	TRUE
Chr_2	1072175	1072389	+	215	XUT0356	0.841091	-0.173991	FALSE	0.0803342	1.24281	FALSE	FALSE	FALSE	0.215051	-1.13574	FALSE	0.0227346	-1.80967	FALSE
Chr_2	1072591	1075934	+	3344	XUT0357	0.421947	0.148657	FALSE	1.00943e-08	0.933479	FALSE	TRUE	FALSE	0.48408	-0.220806	FALSE	0.0167013	-0.4738	FALSE
Chr_2	1076387	1077222	+	836	XUT0359	0.166847	0.452734	FALSE	1.55492e-08	1.57804	TRUE	FALSE	FALSE	0.80347	-0.1832	FALSE	0.639845	-0.181082	FALSE
Chr_2	1077067	1077656	-	590	XUT0360	2.56796e-14	1.88957	TRUE	0.000302772	1.08936	TRUE	TRUE	FALSE	1.6084e-20	1.75661	TRUE	4.18905e-13	1.40583	TRUE
Chr_2	1095642	1097096	+	1455	XUT0361	2.60293e-14	1.77931	TRUE	2.29684e-10	1.72576	TRUE	FALSE	FALSE	1.50847e-20	1.87259	TRUE	5.82337e-15	1.61144	TRUE
Chr_2	1096258	1096648	-	391	XUT0362	0.0364637	1.1322	TRUE	0.00351144	1.69703	TRUE	FALSE	FALSE	0.000174762	0.961577	FALSE	0.0656473	0.515081	FALSE
Chr_2	1098174	1098481	-	308	XUT0363	0.0561757	1.55939	FALSE	0.0141874	1.94487	TRUE	FALSE	FALSE	0.455501	0.88721	FALSE	0.98994	0.0542705	FALSE
Chr_2	1140118	1141011	-	894	XUT0364	0.000117226	1.25819	TRUE	7.19404e-06	1.6439	TRUE	FALSE	FALSE	0.000126087	1.17347	TRUE	0.000476252	1.09657	TRUE
Chr_2	1148804	1149174	+	371	XUT0365	0.0179899	1.7859	TRUE	5.27227e-05	3.01906	TRUE	FALSE	FALSE	0.00388311	2.28678	TRUE	0.00874927	2.08192	TRUE
Chr_2	1183133	1183437	+	305	XUT0366	0.00150882	1.11796	TRUE	3.78194e-06	1.78022	TRUE	FALSE	FALSE	0.0167833	0.772923	FALSE	0.741184	0.134891	FALSE
Chr_2	1247195	1247577	-	383	XUT0367	0.154658	1.07095	FALSE	2.49438e-18	4.65273	TRUE	FALSE	FALSE	0.96192	-0.178058	FALSE	0.217787	1.43055	FALSE
Chr_2	1256644	1256971	-	328	XUT0368	0.0453221	1.05009	TRUE	7.11514e-11	3.03749	TRUE	FALSE	FALSE	0.83533	-0.338216	FALSE	0.932766	0.0821804	FALSE
Chr_2	1257290	1257550	-	261	XUT0369	0.593189	-0.673049	FALSE	0.34265	-0.935907	FALSE	FALSE	FALSE	0.948465	-0.214768	FALSE	0.763816	-0.390957	FALSE
Chr_2	1259295	1260660	+	1366	XUT0370	3.38005e-25	3.56738	TRUE	1.36269e-21	3.54337	TRUE	FALSE	FALSE	4.12263e-33	3.17441	TRUE	2.04729e-28	2.97063	TRUE
Chr_2	1261570	1262223	+	654	XUT0371	1.05759e-06	1.58633	TRUE	5.54307e-11	2.26273	TRUE	FALSE	FALSE	3.04765e-09	1.82951	TRUE	7.23199e-08	1.71234	TRUE
Chr_2	1262267	1262601	-	335	XUT0372	1.86611e-05	2.39751	TRUE	2.6255e-05	2.49222	TRUE	FALSE	FALSE	2.72485e-05	1.93378	TRUE	1.15424e-06	2.22911	TRUE
Chr_2	1283053	1283451	-	399	XUT0373	0.192727	0.837161	FALSE	0.0994654	1.00979	FALSE	FALSE	FALSE	0.517469	0.635171	FALSE	0.229563	0.761003	FALSE
Chr_2	1291948	1292460	+	513	XUT0374	0.0544142	1.16092	FALSE	6.93222e-11	3.52456	TRUE	FALSE	FALSE	0.845846	0.280304	FALSE	0.247064	0.731854	FALSE
Chr_2	1294339	1295136	+	798	XUT0375	6.11489e-15	2.55213	TRUE	3.7924e-32	3.99494	TRUE	TRUE	FALSE	6.73793e-16	2.34004	TRUE	1.0147e-10	1.93904	TRUE
Chr_2	1305348	1305601	-	254	XUT0376	0.698536	-0.485899	FALSE	0.00111275	2.74964	TRUE	FALSE	FALSE	0.940058	0.438844	FALSE	1	0	FALSE
Chr_2	1306396	1306820	-	425	XUT0377	0.435649	0.402897	FALSE	5.88804e-12	3.3412	TRUE	FALSE	FALSE	0.636221	0.577935	FALSE	0.0750415	1.28015	FALSE
Chr_2	1314242	1314666	-	425	XUT0378	0.238946	0.773681	FALSE	6.07872e-05	2.11831	TRUE	FALSE	FALSE	0.296299	0.892051	FALSE	0.554597	0.441955	FALSE
Chr_2	1339358	1339864	-	507	XUT0379	0.00876115	1.34489	TRUE	3.01513e-06	2.30507	TRUE	TRUE	FALSE	0.00410053	1.40654	TRUE	0.0300028	1.10487	TRUE
Chr_2	1342441	1343505	-	1065	XUT0380	0.00547292	1.15536	TRUE	1.62493e-16	3.03383	TRUE	FALSE	FALSE	1.89111e-06	1.51372	TRUE	0.000336202	1.20504	TRUE
Chr_2	1345855	1346057	-	203	XUT0381	0.00498176	2.04332	TRUE	2.46639e-06	3.63578	TRUE	FALSE	FALSE	0.00072183	2.83282	TRUE	0.000179012	3.14865	TRUE
Chr_2	1346131	1346549	-	419	XUT0382	0.000419707	2.65026	TRUE	2.92475e-07	4.00842	TRUE	FALSE	FALSE	1.46569e-05	2.69753	TRUE	0.000330395	2.3119	TRUE
Chr_2	1346747	1346950	-	204	XUT0383	0.0023774	2.04605	TRUE	9.7667e-05	2.55923	TRUE	FALSE	FALSE	0.000870203	2.13344	TRUE	0.0247566	1.51605	TRUE
Chr_2	1352189	1352637	-	449	XUT0384	0.0828725	0.914538	FALSE	4.25329e-09	2.68025	TRUE	FALSE	FALSE	0.0830786	0.846647	FALSE	0.775571	-0.172216	FALSE
Chr_2	1399974	1400927	-	954	XUT0385	4.79282e-05	1.51529	TRUE	2.18211e-15	2.95477	TRUE	FALSE	FALSE	0.000701452	1.16239	TRUE	0.00194651	1.08936	TRUE
Chr_2	1408778	1409167	+	390	XUT0386	0.102381	0.391697	FALSE	7.45052e-10	1.41175	TRUE	FALSE	FALSE	0.12128	0.369548	FALSE	0.608462	-0.1299	FALSE
Chr_2	1417741	1418359	-	619	XUT0387	0.537577	-0.327132	FALSE	0.000125662	1.54137	TRUE	FALSE	FALSE	0.646588	0.415767	FALSE	0.226886	0.623973	FALSE
Chr_2	1427859	1428096	-	238	XUT0388	0.021178	1.69464	TRUE	0.000679874	2.59756	TRUE	FALSE	FALSE	0.00518504	3.19163	TRUE	0.0975487	1.59584	FALSE
Chr_2	1433756	1434358	-	603	XUT0389	3.02347e-06	2.87157	TRUE	0.000440252	2.21238	TRUE	FALSE	FALSE	1.84655e-06	2.26741	TRUE	5.8251e-06	2.20088	TRUE
Chr_2	1457813	1458123	+	311	XUT0390	0.090787	1.18669	FALSE	2.72193e-06	2.9897	TRUE	FALSE	FALSE	0.996593	0.0216347	FALSE	0.700884	0.306257	FALSE
Chr_2	1464187	1464737	-	551	XUT0391	0.141492	1.03568	FALSE	0.00250827	2.01474	TRUE	FALSE	FALSE	0.261147	0.767998	FALSE	0.99352	0.00334706	FALSE
Chr_2	1473206	1473735	+	530	XUT0392	3.94773e-05	1.53911	TRUE	3.26118e-21	3.63315	TRUE	FALSE	FALSE	1.63063e-05	1.90174	TRUE	0.00109224	1.50364	TRUE
Chr_2	1486900	1488029	+	1130	XUT0393	1.47761e-46	2.71229	TRUE	2.33325e-12	1.62367	TRUE	TRUE	FALSE	2.15903e-37	2.37201	TRUE	6.73565e-38	2.40087	TRUE
Chr_2	1493366	1494015	-	650	XUT0394	0.0206922	1.38122	TRUE	0.000362006	2.04887	TRUE	FALSE	FALSE	0.00713304	1.60642	TRUE	0.000466478	2.01912	TRUE
Chr_2	1508985	1510425	+	1441	XUT0395	0.00167151	0.849835	FALSE	1.21295e-15	2.20661	TRUE	FALSE	FALSE	0.00831172	0.911579	FALSE	0.00109224	1.08012	TRUE
Chr_2	1510455	1511386	+	932	XUT0396	0.000117712	1.39705	TRUE	3.07841e-15	2.85559	TRUE	FALSE	FALSE	0.00570384	1.10904	TRUE	0.00864017	1.0556	TRUE
Chr_2	1530617	1530917	+	301	XUT0397	0.0407855	1.15838	TRUE	1.31661e-06	2.47047	TRUE	TRUE	FALSE	0.953239	0.139228	FALSE	0.066435	1.14025	FALSE
Chr_2	1530988	1531932	+	945	XUT0398	0.657434	0.359669	FALSE	0.481839	0.352534	FALSE	FALSE	FALSE	0.125511	0.763627	FALSE	0.488607	0.361521	FALSE
Chr_2	1573510	1573735	-	226	XUT0399	1	-0.511458	FALSE	0.345179	0.875161	FALSE	FALSE	FALSE	0.618241	1.14449	FALSE	0.6098	0.722157	FALSE
Chr_2	1584066	1584714	-	649	XUT0400	0.018694	0.855943	FALSE	0.00201882	1.24363	TRUE	FALSE	FALSE	0.20787	0.668677	FALSE	0.850435	0.11426	FALSE
Chr_2	1600720	1601003	-	284	XUT0401	5.51243e-05	2.29948	TRUE	7.13559e-08	3.02588	TRUE	FALSE	FALSE	7.73494e-07	3.04965	TRUE	1.78003e-10	3.89008	TRUE
Chr_2	1618963	1619309	+	347	XUT0402	0.457446	0.464726	FALSE	6.29399e-11	3.41711	TRUE	FALSE	FALSE	0.694621	0.434316	FALSE	0.410803	-0.5294	FALSE
Chr_2	1652842	1653048	-	207	XUT0403	0.000462725	2.468	TRUE	0.00264297	2.22411	TRUE	FALSE	FALSE	0.0120702	2.52549	TRUE	0.00108831	3.29679	TRUE
Chr_2	1653099	1654354	-	1256	XUT0404	0.000180624	1.89801	TRUE	2.20638e-05	2.30632	TRUE	FALSE	FALSE	3.2889e-16	3.22953	TRUE	3.24328e-10	2.58046	TRUE
Chr_2	1656081	1656506	+	426	XUT0405	0.332043	0.623768	FALSE	0.000597956	2.46223	TRUE	FALSE	FALSE	0.0303259	2.06353	TRUE	0.00543059	2.54691	TRUE
Chr_2	1658396	1659000	-	605	XUT0407	0.461686	0.197084	FALSE	0.0908553	0.380503	FALSE	FALSE	FALSE	0.912002	-0.0614605	FALSE	0.899614	0.0323067	FALSE
Chr_2	1663424	1663725	+	302	XUT0408	0.723386	-0.119635	FALSE	0.00502313	0.864853	FALSE	FALSE	FALSE	0.856065	-0.15025	FALSE	0.225482	-0.469988	FALSE
Chr_2	1668387	1669221	+	835	XUT0410	1.41096e-19	4.00697	TRUE	2.30092e-19	4.14681	TRUE	FALSE	FALSE	8.01043e-27	3.1904	TRUE	4.04674e-25	3.11796	TRUE
Chr_2	1677316	1678167	+	852	XUT0411	1.05196e-07	1.4223	TRUE	4.18305e-15	2.26225	TRUE	FALSE	FALSE	1.81443e-11	1.63872	TRUE	1.09257e-09	1.52233	TRUE
Chr_2	1684188	1685270	-	1083	XUT0412	0.0173858	0.415303	FALSE	8.69078e-05	0.741657	FALSE	FALSE	FALSE	0.00498716	0.877013	FALSE	1.35079e-06	1.39429	TRUE
Chr_2	1685576	1686689	-	1114	XUT0413	7.89437e-38	1.88651	TRUE	1.03959e-28	1.95223	TRUE	TRUE	FALSE	9.65188e-23	1.86047	TRUE	1.64869e-29	2.13652	TRUE
Chr_2	1687643	1688668	-	1026	XUT0414	4.54372e-16	3.25121	TRUE	9.47935e-09	2.54821	TRUE	FALSE	FALSE	1.45661e-05	2.82648	TRUE	3.91388e-07	3.26645	TRUE
Chr_2	1688847	1690366	+	1520	XUT0415	6.13911e-08	4.50959	TRUE	1.99459e-07	4.17884	TRUE	TRUE	FALSE	5.91735e-27	4.2459	TRUE	1.16483e-27	4.3525	TRUE
Chr_2	1693819	1694499	-	681	XUT0416	0.15685	0.754032	FALSE	0.00656759	1.31365	TRUE	FALSE	FALSE	0.50512	1.0536	FALSE	0.201799	1.31086	FALSE
Chr_2	1694636	1694923	-	288	XUT0417	1	1.69091	FALSE	0.642709	0.426204	FALSE	FALSE	FALSE	0.897044	-0.448095	FALSE	0.885532	0.228166	FALSE
Chr_2	1715073	1715531	+	459	XUT0419	0.00695982	1.28509	TRUE	9.80657e-09	2.6218	TRUE	FALSE	FALSE	0.546363	0.457069	FALSE	0.208568	0.629663	FALSE
Chr_2	1738885	1739152	+	268	XUT0420	0.569623	0.705253	FALSE	0.0157003	1.8989	TRUE	FALSE	FALSE	0.901712	-0.567003	FALSE	1	-0.567003	FALSE
Chr_2	1752528	1753775	+	1248	XUT0422	1.61235e-90	3.20941	TRUE	4.23978e-37	2.43837	TRUE	FALSE	FALSE	3.66238e-90	2.85936	TRUE	1.05593e-59	2.3349	TRUE
Chr_2	1754366	1754761	+	396	XUT0423	0.158133	0.706209	FALSE	0.0155965	1.14229	TRUE	FALSE	FALSE	0.785277	0.251498	FALSE	0.843214	-0.091651	FALSE
Chr_2	1755458	1756089	-	632	XUT0424	1.28228e-09	1.36147	TRUE	4.41892e-22	2.38386	TRUE	TRUE	FALSE	6.95913e-10	1.13121	TRUE	3.50389e-06	0.894396	FALSE
Chr_3	16443	16727	-	285	XUT0425	0.0356546	1.21777	TRUE	0.00476119	1.7196	TRUE	FALSE	FALSE	0.388193	0.859808	FALSE	0.114397	1.14434	FALSE
Chr_3	20517	21605	-	1089	XUT0426	9.19866e-09	1.66197	TRUE	4.70999e-17	2.56287	TRUE	FALSE	FALSE	1.43187e-06	1.20945	TRUE	5.40027e-05	1.05145	TRUE
Chr_3	21732	22870	-	1139	XUT0427	0.0254444	0.74649	FALSE	3.53814e-13	2.17224	TRUE	FALSE	FALSE	0.0118192	0.733737	FALSE	2.92278e-06	1.23665	TRUE
Chr_3	31981	32656	+	676	XUT0428	0.0945136	0.680273	FALSE	5.67287e-27	3.4027	TRUE	FALSE	FALSE	0.00165075	1.43326	TRUE	8.46631e-06	1.92732	TRUE
Chr_3	34907	37406	+	2500	XUT0429	7.18418e-83	2.67618	TRUE	8.11614e-45	2.35941	TRUE	TRUE	FALSE	3.15529e-57	2.9501	TRUE	7.81234e-62	3.07737	TRUE
Chr_3	46369	47251	-	883	XUT0430	1.192e-20	2.01203	TRUE	1.86004e-13	1.89905	TRUE	TRUE	FALSE	5.533e-16	1.63152	TRUE	4.08223e-18	1.76338	TRUE
Chr_3	47473	48382	-	910	XUT0431	0.303001	0.284178	FALSE	3.20028e-20	1.93887	TRUE	FALSE	FALSE	0.987015	0.0138887	FALSE	0.0399325	-0.506635	FALSE
Chr_3	51149	51526	+	378	XUT0432	4.78605e-06	1.7655	TRUE	2.01968e-08	2.38061	TRUE	FALSE	FALSE	0.00241621	1.06007	TRUE	0.568744	0.238396	FALSE
Chr_3	79920	80774	-	855	XUT0433	0.000499265	1.43121	TRUE	1.62662e-07	2.32183	TRUE	TRUE	FALSE	0.0234552	0.626194	FALSE	0.0199046	0.613097	FALSE
Chr_3	94327	94778	+	452	XUT0434	0.00386712	1.20928	TRUE	1.36306e-05	1.87704	TRUE	TRUE	FALSE	6.57622e-05	1.2363	TRUE	0.0452826	0.696179	FALSE
Chr_3	107604	108212	+	609	XUT0435	0.645861	0.187199	FALSE	6.63782e-05	0.99785	FALSE	FALSE	FALSE	0.0177735	-0.554726	FALSE	0.00407799	-0.64516	FALSE
Chr_3	107742	108536	-	795	XUT0436	2.43019e-93	2.38558	TRUE	8.32974e-35	1.7617	TRUE	TRUE	FALSE	1.03066e-47	1.89095	TRUE	2.07438e-35	1.6298	TRUE
Chr_3	117330	117978	-	649	XUT0437	3.79497e-65	2.8487	TRUE	1.11206e-35	2.46979	TRUE	TRUE	FALSE	3.32402e-46	2.66671	TRUE	2.52222e-38	2.43942	TRUE
Chr_3	121109	121631	+	523	XUT0439	0.597228	0.226865	FALSE	6.75988e-09	2.17438	TRUE	FALSE	FALSE	0.909523	-0.600607	FALSE	1	-1.16902	FALSE
Chr_3	121650	121883	+	234	XUT0440	0.803427	0.133556	FALSE	0.0267885	1.96534	TRUE	FALSE	FALSE	0.996435	-0.00958102	FALSE	1	-0.321603	FALSE
Chr_3	124051	125244	-	1194	XUT0441	3.20197e-18	1.92533	TRUE	5.11167e-20	2.29145	TRUE	FALSE	FALSE	1.09178e-07	1.06879	TRUE	5.23323e-09	1.18251	TRUE
Chr_3	131572	132147	+	576	XUT0443	0.000137621	2.23279	TRUE	2.47364e-05	2.56192	TRUE	FALSE	FALSE	0.000955629	1.9314	TRUE	0.0377575	1.26576	TRUE
Chr_3	132553	133007	+	455	XUT0444	0.00160213	1.65175	TRUE	4.07849e-10	3.23821	TRUE	FALSE	FALSE	9.38023e-05	1.86639	TRUE	0.00599191	1.40586	TRUE
Chr_3	195610	196243	+	634	XUT0445	2.19028e-10	2.52804	TRUE	1.56065e-09	2.59152	TRUE	FALSE	FALSE	3.34658e-06	1.59104	TRUE	4.17283e-06	1.60737	TRUE
Chr_3	218784	218992	-	209	XUT0446	0.614614	-0.415488	FALSE	0.727768	0.258121	FALSE	FALSE	FALSE	0.987252	0.0428316	FALSE	0.565986	-0.461425	FALSE
Chr_3	221666	222267	-	602	XUT0447	0.000654511	1.71669	TRUE	1.05654e-11	3.28273	TRUE	FALSE	FALSE	0.00080761	1.61518	TRUE	2.63959e-05	1.98478	TRUE
Chr_3	259692	260302	-	611	XUT0449	1.0477e-10	2.24528	TRUE	0.00889009	1.11155	TRUE	FALSE	FALSE	4.69825e-10	2.2326	TRUE	1.03093e-07	1.96032	TRUE
Chr_3	273114	273389	-	276	XUT0450	0.891304	0.00632322	FALSE	0.015833	1.68592	TRUE	FALSE	FALSE	0.940058	0.312022	FALSE	1	0	FALSE
Chr_3	274323	274533	+	211	XUT0451	0.712382	-0.192474	FALSE	0.00954927	2.28315	TRUE	FALSE	FALSE	NA	NA	NA	NA	NA	NA
Chr_3	291115	291403	-	289	XUT0452	0.105183	1.17923	FALSE	0.00109506	2.21316	TRUE	FALSE	FALSE	0.158525	1.2401	FALSE	0.0876989	1.3082	FALSE
Chr_3	292198	292845	-	648	XUT0453	0.457084	0.599827	FALSE	2.84907e-05	2.24299	TRUE	FALSE	FALSE	0.0190502	1.49417	TRUE	0.00174742	1.86883	TRUE
Chr_3	339378	340131	+	754	XUT0455	0.000573043	1.21486	TRUE	1.57543e-07	1.94432	TRUE	FALSE	FALSE	2.27407e-06	1.4495	TRUE	0.00482422	0.938354	FALSE
Chr_3	368299	368622	-	324	XUT0456	0.792923	0.137116	FALSE	1.70557e-05	1.36935	TRUE	TRUE	FALSE	0.165162	-0.471552	FALSE	0.000643491	-0.969959	FALSE
Chr_3	375363	376852	-	1490	XUT0457	4.42115e-14	1.76429	TRUE	2.64618e-33	3.09515	TRUE	TRUE	FALSE	6.99558e-18	1.87553	TRUE	2.50106e-15	1.7593	TRUE
Chr_3	384994	386509	-	1516	XUT0458	0.000546499	1.41459	TRUE	2.12472e-11	2.68459	TRUE	TRUE	FALSE	0.397483	0.499368	FALSE	0.99734	0.00615708	FALSE
Chr_3	391311	391855	-	545	XUT0459	0.000758733	1.62317	TRUE	3.85359e-06	2.30746	TRUE	FALSE	FALSE	9.37169e-08	1.66215	TRUE	0.000111527	1.2801	TRUE
Chr_3	404430	404821	+	392	XUT0460	0.11549	0.483483	FALSE	8.47749e-11	1.70464	TRUE	TRUE	FALSE	0.556438	0.21297	FALSE	0.271511	-0.253279	FALSE
Chr_3	411439	411656	-	218	XUT0461	0.00797389	1.91381	TRUE	5.02445e-09	3.94922	TRUE	FALSE	FALSE	0.0326794	1.71771	TRUE	0.0116752	1.91738	TRUE
Chr_3	414502	415171	-	670	XUT0462	0.909946	-0.0791077	FALSE	1.98847e-07	1.99721	TRUE	FALSE	FALSE	0.837852	-0.494134	FALSE	0.369113	-1.08176	FALSE
Chr_3	423432	424257	+	826	XUT0463	0.0373346	0.869306	FALSE	0.265615	0.582532	FALSE	FALSE	FALSE	0.0157287	0.916715	FALSE	0.0150278	0.910357	FALSE
Chr_3	427240	428085	-	846	XUT0465	0.0419209	0.991967	FALSE	7.2109e-10	2.81792	TRUE	FALSE	FALSE	0.000918288	1.41457	TRUE	0.0118722	1.12961	TRUE
Chr_3	431608	432107	-	500	XUT0466	0.0380561	1.24218	TRUE	0.000282924	2.08617	TRUE	FALSE	FALSE	0.278248	0.81072	FALSE	0.58953	0.351707	FALSE
Chr_3	438508	438861	-	354	XUT0467	0.64588	0.271227	FALSE	4.47598e-09	1.95684	TRUE	FALSE	FALSE	0.80379	0.235664	FALSE	0.931317	-0.049446	FALSE
Chr_3	438624	438856	+	233	XUT0468	0.409246	0.50806	FALSE	0.00102138	1.635	TRUE	TRUE	FALSE	0.367144	0.528335	FALSE	0.665963	0.225923	FALSE
Chr_3	448776	449592	+	817	XUT0469	3.98743e-09	1.83916	TRUE	5.43628e-11	2.27119	TRUE	FALSE	FALSE	7.94067e-11	1.82648	TRUE	8.56506e-08	1.56043	TRUE
Chr_3	465274	466363	-	1090	XUT0470	0.00392736	0.520249	FALSE	4.88219e-25	1.81202	TRUE	FALSE	FALSE	0.000471035	0.667183	FALSE	0.000938947	0.637044	FALSE
Chr_3	469975	470494	+	520	XUT0471	4.65836e-10	1.28236	TRUE	2.73139e-25	2.31697	TRUE	TRUE	FALSE	0.0010425	0.82886	FALSE	3.50037e-05	1.01328	TRUE
Chr_3	484311	484675	-	365	XUT0472	0.0991739	1.14399	FALSE	0.000872719	2.17251	TRUE	FALSE	FALSE	0.00136974	3.18198	TRUE	0.00362089	2.82996	TRUE
Chr_3	493164	493573	+	410	XUT0473	0.201179	0.544182	FALSE	0.000340293	1.43634	TRUE	FALSE	FALSE	0.874893	0.175417	FALSE	0.914592	-0.0494988	FALSE
Chr_3	508610	509107	+	498	XUT0474	0.0219413	1.42862	TRUE	3.50135e-06	2.91675	TRUE	FALSE	FALSE	0.053917	1.45862	FALSE	0.116065	1.14753	FALSE
Chr_3	513367	513606	-	240	XUT0475	0.422536	0.665169	FALSE	7.74582e-06	2.62237	TRUE	FALSE	FALSE	0.890504	0.42084	FALSE	0.58593	0.802051	FALSE
Chr_3	527177	528012	-	836	XUT0476	2.1973e-08	2.4791	TRUE	1.35656e-10	3.00879	TRUE	FALSE	FALSE	2.01014e-05	2.01432	TRUE	4.78833e-07	2.35896	TRUE
Chr_3	530104	531496	-	1393	XUT0477	2.16375e-18	1.7237	TRUE	2.94791e-18	1.98353	TRUE	TRUE	FALSE	1.24047e-26	1.83483	TRUE	3.06954e-17	1.49099	TRUE
Chr_3	568809	570713	+	1905	XUT0479	1.7747e-18	1.45248	TRUE	3.30561e-26	2.07749	TRUE	TRUE	FALSE	7.63004e-16	1.33965	TRUE	7.43721e-15	1.30253	TRUE
Chr_3	589401	592541	-	3141	XUT0480	0.00375184	0.401496	FALSE	3.98744e-07	0.771762	FALSE	FALSE	FALSE	0.893298	0.0572767	FALSE	0.0586678	-0.295804	FALSE
Chr_3	589534	590340	+	807	XUT0481	0.990542	-0.0265863	FALSE	0.0352221	1.02733	TRUE	FALSE	FALSE	0.0115681	1.62016	TRUE	0.000121345	2.28558	TRUE
Chr_3	592710	593749	+	1040	XUT0482	6.60367e-47	2.63813	TRUE	3.93044e-25	2.28425	TRUE	TRUE	FALSE	1.97807e-53	2.43701	TRUE	2.02292e-48	2.3309	TRUE
Chr_3	635091	635691	-	601	XUT0484	0.91315	-0.067375	FALSE	0.0102865	0.962762	FALSE	FALSE	FALSE	0.768043	0.304198	FALSE	0.00650426	1.17688	TRUE
Chr_3	647582	648307	-	726	XUT0485	8.68914e-09	2.01955	TRUE	0.000699339	1.41773	TRUE	FALSE	FALSE	3.67146e-05	2.01176	TRUE	2.12429e-10	2.98699	TRUE
Chr_3	689937	692745	+	2809	XUT0486	6.82779e-30	2.29312	TRUE	1.7037e-24	2.38675	TRUE	FALSE	FALSE	1.93979e-35	2.52906	TRUE	1.74928e-30	2.36633	TRUE
Chr_3	717403	717669	+	267	XUT0487	0.0131917	1.51614	TRUE	0.0626191	1.19485	FALSE	FALSE	FALSE	0.20787	0.94538	FALSE	0.770658	0.247772	FALSE
Chr_3	728140	728561	-	422	XUT0488	9.92058e-11	2.52154	TRUE	0.00142912	1.48668	TRUE	TRUE	FALSE	7.9065e-16	2.66443	TRUE	4.99085e-15	2.63145	TRUE
Chr_3	766214	766958	-	745	XUT0489	0.00878976	0.495203	FALSE	1.97378e-14	1.50477	TRUE	FALSE	FALSE	0.0879508	0.533527	FALSE	7.41469e-09	1.43253	TRUE
Chr_3	777499	778987	-	1489	XUT0490	2.72334e-34	2.95266	TRUE	3.36326e-18	2.42942	TRUE	TRUE	FALSE	2.99835e-41	2.56871	TRUE	3.94774e-37	2.46989	TRUE
Chr_3	791776	792028	+	253	XUT0491	0.356415	0.796356	FALSE	0.0434544	1.68725	TRUE	FALSE	FALSE	0.38279	-1.47563	FALSE	0.818066	-0.39648	FALSE
Chr_3	795237	797221	-	1985	XUT0492	1.3958e-120	2.90985	TRUE	8.03598e-44	2.11041	TRUE	TRUE	FALSE	5.54697e-72	2.95971	TRUE	7.83633e-82	3.17479	TRUE
Chr_3	800880	801364	-	485	XUT0493	0.9959	-0.0614544	FALSE	0.077938	1.03149	FALSE	FALSE	FALSE	0.632114	-0.587778	FALSE	0.697058	0.327214	FALSE
Chr_3	831318	831694	-	377	XUT0494	0.000520274	1.97551	TRUE	4.18352e-07	2.95757	TRUE	FALSE	FALSE	0.000616422	1.699	TRUE	3.05667e-06	2.25694	TRUE
Chr_3	837889	838297	-	409	XUT0495	0.999162	-0.0110791	FALSE	1.96805e-05	1.59879	TRUE	FALSE	FALSE	0.986292	0.0247601	FALSE	0.456599	-0.361227	FALSE
Chr_3	842917	843985	-	1069	XUT0496	0.00267376	0.771653	FALSE	0.00105113	0.898454	FALSE	TRUE	FALSE	0.0231297	0.644538	FALSE	0.00621112	0.734418	FALSE
Chr_3	844292	844904	-	613	XUT0497	6.544e-07	1.36537	TRUE	4.75753e-20	2.67149	TRUE	TRUE	FALSE	3.97945e-07	1.12271	TRUE	0.0502948	0.493127	FALSE
Chr_3	849146	849477	+	332	XUT0498	0.62665	0.297586	FALSE	1.82291e-05	2.32348	TRUE	FALSE	FALSE	0.874777	-0.27473	FALSE	0.989882	0.00315446	FALSE
Chr_3	859569	860320	+	752	XUT0499	7.21986e-05	1.69009	TRUE	4.3383e-06	2.07466	TRUE	FALSE	FALSE	1.29363e-05	1.61376	TRUE	4.57205e-08	2.01625	TRUE
Chr_3	863012	863571	+	560	XUT0500	0.939025	0.0148013	FALSE	0.253102	0.897849	FALSE	FALSE	FALSE	0.363325	1.26904	FALSE	0.1839	1.37333	FALSE
Chr_3	881668	882052	-	385	XUT0501	0.908289	-0.0806167	FALSE	0.227235	0.663679	FALSE	FALSE	FALSE	0.962452	0.207867	FALSE	0.337018	1.41498	FALSE
Chr_3	886684	886956	+	273	XUT0502	0.520904	0.511187	FALSE	0.035321	1.48708	TRUE	FALSE	FALSE	0.703718	-0.870391	FALSE	0.495765	1.00137	FALSE
Chr_3	894991	896144	-	1154	XUT0503	1.22722e-16	3.69075	TRUE	1.62944e-12	3.36226	TRUE	TRUE	FALSE	2.41279e-33	3.93551	TRUE	6.58479e-34	4.01002	TRUE
Chr_3	896165	896651	-	487	XUT0504	0.172274	0.823628	FALSE	0.0185414	1.26208	TRUE	FALSE	FALSE	0.576667	0.443881	FALSE	0.834336	0.114006	FALSE
Chr_3	900186	900387	-	202	XUT0505	0.804249	0.169537	FALSE	3.4274e-05	1.90053	TRUE	FALSE	FALSE	0.67211	-0.34729	FALSE	0.0154889	-1.13047	FALSE
Chr_3	900727	901042	-	316	XUT0506	0.0729988	1.12437	FALSE	1.58913e-09	4.09759	TRUE	FALSE	FALSE	0.0153887	2.48033	TRUE	0.0108043	2.50935	TRUE
Chr_3	905961	907936	+	1976	XUT0507	2.8822e-11	1.79111	TRUE	1.55529e-36	3.52601	TRUE	FALSE	FALSE	4.3011e-15	1.87687	TRUE	1.05672e-14	1.8862	TRUE
Chr_3	916977	918925	+	1949	XUT0508	3.10486e-34	2.42463	TRUE	1.46474e-34	2.7772	TRUE	FALSE	FALSE	2.12402e-49	2.31131	TRUE	1.9256e-35	1.9845	TRUE
Chr_3	933515	934127	+	613	XUT0509	0.941313	0.093802	FALSE	1.26885e-14	3.45712	TRUE	FALSE	FALSE	0.274521	1.14074	FALSE	0.0249214	1.77824	TRUE
Chr_3	954683	955723	-	1041	XUT0510	4.98942e-40	2.75309	TRUE	8.46892e-23	2.39883	TRUE	TRUE	FALSE	3.58169e-43	2.70258	TRUE	5.79732e-39	2.58646	TRUE
Chr_3	957432	957661	-	230	XUT0511	0.81557	0.328919	FALSE	0.00125602	2.58853	TRUE	FALSE	FALSE	0.716577	-1.04349	FALSE	1	-1.73874	FALSE
Chr_3	966367	966835	+	469	XUT0512	0.0818254	1.07471	FALSE	0.0111996	1.50134	TRUE	FALSE	FALSE	7.50861e-07	2.24179	TRUE	4.16549e-07	2.32627	TRUE
Chr_3	972959	973958	-	1000	XUT0513	6.07913e-07	1.25843	TRUE	5.83299e-08	1.51832	TRUE	FALSE	FALSE	0.000191747	0.988182	FALSE	0.000131775	1.01689	TRUE
Chr_3	1021755	1021985	-	231	XUT0514	0.541035	0.413939	FALSE	0.0166276	1.67497	TRUE	FALSE	FALSE	0.851748	-0.720675	FALSE	1	-1.31052	FALSE
Chr_3	1022639	1022884	-	246	XUT0515	0.81557	0.336498	FALSE	0.0386432	1.71412	TRUE	FALSE	FALSE	0.904658	0.466379	FALSE	0.909816	0.172301	FALSE
Chr_3	1028397	1031512	-	3116	XUT0516	1.65893e-41	1.80714	TRUE	2.26891e-25	1.69535	TRUE	FALSE	FALSE	1.17923e-27	1.56627	TRUE	2.25781e-21	1.37502	TRUE
Chr_3	1047760	1048573	-	814	XUT0517	7.26165e-08	0.983359	FALSE	1.72883e-18	1.77226	TRUE	TRUE	FALSE	1.07669e-05	0.716839	FALSE	0.0134457	0.430278	FALSE
Chr_3	1056163	1056842	+	680	XUT0518	4.72961e-06	2.22778	TRUE	6.08461e-08	2.76508	TRUE	FALSE	FALSE	1.61131e-08	2.63409	TRUE	0.000135211	1.89966	TRUE
Chr_3	1062038	1062533	+	496	XUT0519	0.0124033	1.2249	TRUE	6.27153e-11	3.09364	TRUE	FALSE	FALSE	8.36056e-05	2.13377	TRUE	0.0370466	1.26151	TRUE
Chr_3	1064253	1065142	+	890	XUT0520	5.02148e-19	2.3422	TRUE	1.37252e-11	2.0565	TRUE	TRUE	FALSE	2.3145e-24	2.15803	TRUE	3.6644e-26	2.26423	TRUE
Chr_3	1065120	1066459	-	1340	XUT0521	2.79877e-42	2.28448	TRUE	3.13045e-42	2.64143	TRUE	FALSE	FALSE	8.13827e-29	2.13751	TRUE	2.27721e-24	1.97757	TRUE
Chr_3	1124895	1125552	+	658	XUT0523	1.83963e-13	2.44727	TRUE	4.41699e-22	3.50839	TRUE	FALSE	FALSE	3.93115e-17	1.78751	TRUE	5.30932e-08	1.22804	TRUE
Chr_3	1146628	1147789	-	1162	XUT0524	2.26079e-22	2.6847	TRUE	1.42091e-20	2.86495	TRUE	FALSE	FALSE	9.10373e-21	2.50559	TRUE	5.55003e-32	3.13964	TRUE
Chr_3	1160417	1161890	+	1474	XUT0526	2.15447e-47	1.91568	TRUE	2.01113e-24	1.64706	TRUE	TRUE	FALSE	1.35423e-36	1.82547	TRUE	8.40182e-28	1.593	TRUE
Chr_3	1189535	1190667	+	1133	XUT0527	6.544e-07	2.12236	TRUE	1.58841e-06	2.22026	TRUE	FALSE	FALSE	1.05471e-07	2.22332	TRUE	8.51718e-10	2.5511	TRUE
Chr_3	1232013	1232784	+	772	XUT0528	8.70475e-34	2.7218	TRUE	3.28971e-17	2.2367	TRUE	FALSE	FALSE	1.12861e-56	2.629	TRUE	1.60995e-41	2.2751	TRUE
Chr_3	1232160	1232501	-	342	XUT0529	0.000359089	1.76955	TRUE	0.0123895	1.40146	TRUE	FALSE	FALSE	0.0416287	1.40174	TRUE	0.0399857	1.335	TRUE
Chr_3	1235423	1235626	+	204	XUT0530	1.77978e-06	3.76569	TRUE	1.02618e-05	3.42474	TRUE	FALSE	FALSE	1.58595e-06	2.29204	TRUE	2.43115e-05	2.09731	TRUE
Chr_3	1238584	1239898	+	1315	XUT0531	2.2844e-15	2.03788	TRUE	1.90244e-13	2.1591	TRUE	TRUE	FALSE	1.7811e-17	2.11829	TRUE	9.28658e-16	2.02744	TRUE
Chr_4	2653	4418	+	1766	XUT0532	2.02593e-35	2.71328	TRUE	5.58066e-06	1.27043	TRUE	FALSE	FALSE	5.43308e-41	2.84738	TRUE	8.824e-27	2.32028	TRUE
Chr_4	5291	6177	+	887	XUT0533	9.12887e-08	1.67496	TRUE	0.000154182	1.43698	TRUE	FALSE	FALSE	2.25179e-12	1.86187	TRUE	4.84382e-07	1.41245	TRUE
Chr_4	5533	6161	-	629	XUT0534	2.34587e-06	1.68765	TRUE	0.000129667	1.53063	TRUE	TRUE	FALSE	1.00717e-06	1.74304	TRUE	2.94616e-05	1.52985	TRUE
Chr_4	30995	33210	+	2216	XUT0535	1.45507e-21	1.57923	TRUE	5.36374e-46	2.67272	TRUE	TRUE	FALSE	1.55009e-12	1.21052	TRUE	7.53612e-21	1.59282	TRUE
Chr_4	75912	76210	-	299	XUT0536	0.176668	0.869234	FALSE	2.19498e-09	3.67574	TRUE	FALSE	FALSE	0.00140879	1.9637	TRUE	0.0846494	1.15071	FALSE
Chr_4	79189	79614	-	426	XUT0537	0.00095356	1.77854	TRUE	0.000560419	1.94773	TRUE	FALSE	FALSE	0.963918	-0.0718462	FALSE	0.312663	0.649588	FALSE
Chr_4	128853	129230	-	378	XUT0538	0.000182894	2.23584	TRUE	2.2522e-07	3.09757	TRUE	TRUE	FALSE	0.285368	0.72403	FALSE	0.252233	0.631243	FALSE
Chr_4	140028	140552	+	525	XUT0539	0.0935235	0.639935	FALSE	6.17698e-07	1.702	TRUE	FALSE	FALSE	0.900993	0.153283	FALSE	0.364888	0.433762	FALSE
Chr_4	164323	166197	-	1875	XUT0541	6.82972e-113	3.79368	TRUE	7.20284e-33	2.43646	TRUE	FALSE	FALSE	9.39288e-102	3.21678	TRUE	1.91899e-92	3.083	TRUE
Chr_4	175478	179003	-	3526	XUT0542	0.000654511	1.83496	TRUE	1.44418e-06	2.90708	TRUE	FALSE	FALSE	7.04136e-30	1.84944	TRUE	1.62635e-45	2.30074	TRUE
Chr_4	231230	232130	+	901	XUT0544	0.0208498	0.540086	FALSE	0.00109213	0.781128	FALSE	FALSE	FALSE	0.00930956	0.677755	FALSE	7.54744e-05	0.960789	FALSE
Chr_4	242996	243527	+	532	XUT0545	0.000451415	2.4076	TRUE	5.76142e-06	3.03629	TRUE	FALSE	FALSE	0.000853165	1.94483	TRUE	0.0025841	1.7931	TRUE
Chr_4	243825	244025	-	201	XUT0546	0.988958	-0.1955	FALSE	0.182557	0.973487	FALSE	FALSE	FALSE	0.792343	0.668004	FALSE	0.922938	0.0840646	FALSE
Chr_4	250209	250559	+	351	XUT0547	0.0163482	1.94894	TRUE	0.00354387	2.41127	TRUE	FALSE	FALSE	0.93897	0.225524	FALSE	0.766422	-0.39637	FALSE
Chr_4	253982	255096	-	1115	XUT0548	4.04315e-23	1.40818	TRUE	1.93816e-24	1.73818	TRUE	TRUE	FALSE	4.08687e-12	1.1202	TRUE	6.12522e-08	0.895545	FALSE
Chr_4	254948	255861	+	914	XUT0549	0.232874	0.343178	FALSE	6.92955e-20	2.08308	TRUE	FALSE	FALSE	0.562952	0.232368	FALSE	0.201274	0.324593	FALSE
Chr_4	263483	264684	-	1202	XUT0550	0.774322	-0.172496	FALSE	0.000245663	1.31962	TRUE	FALSE	FALSE	0.838096	-0.199289	FALSE	0.269741	-0.500086	FALSE
Chr_4	301590	303129	-	1540	XUT0551	7.57394e-89	3.12025	TRUE	1.13894e-36	2.38331	TRUE	TRUE	FALSE	3.11878e-95	2.91748	TRUE	2.84831e-73	2.57238	TRUE
Chr_4	301983	305063	+	3081	XUT0552	5.15047e-30	2.38489	TRUE	6.57691e-48	3.40755	TRUE	TRUE	FALSE	1.2367e-27	2.11732	TRUE	9.16823e-30	2.21784	TRUE
Chr_4	312545	313482	-	938	XUT0553	3.50328e-06	1.32313	TRUE	0.0176941	0.81365	FALSE	FALSE	FALSE	8.74218e-05	1.22901	TRUE	7.65568e-12	2.03005	TRUE
Chr_4	315643	316033	+	391	XUT0554	0.0796366	1.09389	FALSE	0.0011595	1.91137	TRUE	FALSE	FALSE	0.563895	-0.945317	FALSE	0.294661	1.32197	FALSE
Chr_4	351831	353301	-	1471	XUT0555	5.22143e-13	1.70664	TRUE	4.15766e-09	1.61077	TRUE	TRUE	FALSE	2.21731e-14	1.67841	TRUE	2.49561e-15	1.75571	TRUE
Chr_4	364741	364980	-	240	XUT0556	0.908396	0.107098	FALSE	0.207035	0.800318	FALSE	FALSE	FALSE	0.981155	0.0613711	FALSE	0.313641	0.679727	FALSE
Chr_4	375013	376084	-	1072	XUT0557	0.000395468	1.07225	TRUE	1.31548e-06	1.55178	TRUE	FALSE	FALSE	1.94503e-05	1.17894	TRUE	0.000149557	1.08578	TRUE
Chr_4	382074	382418	+	345	XUT0558	5.17525e-05	1.95042	TRUE	8.80718e-12	3.3394	TRUE	FALSE	FALSE	6.50522e-05	1.99857	TRUE	0.000271887	1.87268	TRUE
Chr_4	385025	385543	+	519	XUT0559	0.0389719	0.950091	FALSE	1.1129e-07	2.38866	TRUE	FALSE	FALSE	0.244418	0.800943	FALSE	0.105171	0.901484	FALSE
Chr_4	388240	389065	+	826	XUT0560	0.589989	0.4238	FALSE	1.15212e-12	2.77013	TRUE	FALSE	FALSE	0.749399	0.306084	FALSE	0.563984	-0.296132	FALSE
Chr_4	389073	389643	+	571	XUT0561	0.984178	0.191568	FALSE	9.10461e-08	2.46936	TRUE	FALSE	FALSE	0.999826	0.000610816	FALSE	0.623643	-0.267747	FALSE
Chr_4	391274	392422	+	1149	XUT0562	5.15212e-85	2.50052	TRUE	1.0327e-59	2.49712	TRUE	TRUE	FALSE	1.9145e-47	2.28781	TRUE	1.37385e-46	2.27517	TRUE
Chr_4	410851	411147	-	297	XUT0564	0.289927	0.713229	FALSE	0.000279359	2.1527	TRUE	FALSE	FALSE	0.0581196	1.47448	FALSE	0.000950913	2.28695	TRUE
Chr_4	420250	421192	-	943	XUT0565	7.92769e-06	1.24078	TRUE	3.05991e-48	3.89027	TRUE	FALSE	FALSE	2.94134e-07	1.34267	TRUE	1.48659e-05	1.17424	TRUE
Chr_4	466875	467086	-	212	XUT0566	1	1.61239	FALSE	0.040863	2.36208	TRUE	FALSE	FALSE	0.909095	0.529528	FALSE	1	-0.311179	FALSE
Chr_4	468844	469448	-	605	XUT0567	0.00838686	1.1253	TRUE	2.79136e-14	3.11433	TRUE	FALSE	FALSE	0.934032	0.142653	FALSE	0.971398	-0.0282251	FALSE
Chr_4	477497	480708	-	3212	XUT0568	3.89942e-23	1.20552	TRUE	4.99584e-19	1.30993	TRUE	FALSE	FALSE	9.88879e-12	1.08724	TRUE	8.9285e-11	1.04242	TRUE
Chr_4	480807	481642	+	836	XUT0569	2.61728e-46	2.13707	TRUE	6.78658e-37	2.279	TRUE	TRUE	FALSE	5.44859e-39	1.866	TRUE	5.74928e-28	1.58494	TRUE
Chr_4	498399	499130	-	732	XUT0570	1.19587e-06	1.47791	TRUE	1.07732e-12	2.29555	TRUE	FALSE	FALSE	1.69052e-06	1.5476	TRUE	4.45584e-05	1.3782	TRUE
Chr_4	512553	513034	+	482	XUT0571	0.57742	0.421531	FALSE	0.000262515	2.30488	TRUE	FALSE	FALSE	0.937557	0.280266	FALSE	0.246433	1.4327	FALSE
Chr_4	562807	563081	-	275	XUT0572	0.914942	-0.0483404	FALSE	0.0588476	1.27474	FALSE	FALSE	FALSE	0.726936	0.487148	FALSE	0.363973	0.65382	FALSE
Chr_4	570621	570894	-	274	XUT0573	0.960895	-0.011954	FALSE	0.00412716	1.95969	TRUE	FALSE	FALSE	0.995141	-0.00958102	FALSE	1	0.63971	FALSE
Chr_4	574196	574887	+	692	XUT0574	0.00217562	2.24772	TRUE	1.61596e-06	3.59466	TRUE	FALSE	FALSE	0.0108202	1.75772	TRUE	0.00758036	1.82413	TRUE
Chr_4	579700	580490	+	791	XUT0575	0.0679687	0.784566	FALSE	2.65979e-06	1.91969	TRUE	FALSE	FALSE	0.000210363	1.52925	TRUE	1.2791e-06	1.95864	TRUE
Chr_4	591792	593076	+	1285	XUT0576	3.41233e-31	2.44493	TRUE	1.48276e-25	2.57349	TRUE	FALSE	FALSE	1.89679e-21	2.61287	TRUE	1.24835e-43	3.75913	TRUE
Chr_4	595194	596882	-	1689	XUT0577	2.19156e-07	0.9726	FALSE	1.3113e-25	2.17538	TRUE	FALSE	FALSE	0.0229904	0.770871	FALSE	3.39645e-12	2.00762	TRUE
Chr_4	608498	608818	-	321	XUT0578	0.371732	0.839843	FALSE	0.0571894	1.54238	FALSE	FALSE	FALSE	0.661052	-0.940943	FALSE	0.807909	-0.372509	FALSE
Chr_4	621727	622750	-	1024	XUT0579	7.00524e-12	2.15686	TRUE	1.48108e-16	2.81491	TRUE	TRUE	FALSE	8.79889e-23	2.3218	TRUE	9.69307e-21	2.25178	TRUE
Chr_4	626052	626464	-	413	XUT0580	0.972967	-0.0846408	FALSE	0.000550665	1.82276	TRUE	FALSE	FALSE	0.828395	0.497956	FALSE	0.427394	0.807827	FALSE
Chr_4	626480	626995	-	516	XUT0581	0.0197381	1.25917	TRUE	0.000439313	1.85615	TRUE	FALSE	FALSE	2.31342e-06	2.83522	TRUE	3.22655e-08	3.29385	TRUE
Chr_4	632092	632944	-	853	XUT0582	0.00230925	1.36015	TRUE	2.13837e-06	2.24694	TRUE	FALSE	FALSE	4.9219e-06	1.94886	TRUE	0.00144305	1.46169	TRUE
Chr_4	637114	637717	+	604	XUT0583	0.128943	0.6025	FALSE	3.68476e-05	1.397	TRUE	FALSE	FALSE	0.885138	-0.137164	FALSE	0.715692	-0.150341	FALSE
Chr_4	639111	639694	+	584	XUT0584	0.0894949	0.822425	FALSE	0.000537741	1.59122	TRUE	FALSE	FALSE	0.000418947	1.6222	TRUE	4.13098e-05	1.86164	TRUE
Chr_4	647034	647568	-	535	XUT0585	0.000359089	1.55843	TRUE	3.14601e-06	2.10872	TRUE	FALSE	FALSE	2.45704e-05	1.729	TRUE	0.000245	1.55625	TRUE
Chr_4	648059	649081	+	1023	XUT0586	1.33582e-12	2.01245	TRUE	5.7178e-13	2.26893	TRUE	FALSE	FALSE	1.39087e-17	2.29576	TRUE	7.22606e-18	2.35226	TRUE
Chr_4	715562	717036	-	1475	XUT0587	1.47661e-05	1.58756	TRUE	1.70618e-12	2.74884	TRUE	FALSE	FALSE	2.49634e-05	1.65587	TRUE	5.0424e-05	1.62436	TRUE
Chr_4	717381	717624	-	244	XUT0588	0.000348041	2.28028	TRUE	0.0017743	2.09709	TRUE	FALSE	FALSE	8.87784e-08	2.44061	TRUE	0.000439877	1.7363	TRUE
Chr_4	727215	728755	-	1541	XUT0589	0.602953	0.0836819	FALSE	0.718169	0.0497002	FALSE	FALSE	FALSE	0.78707	-0.106029	FALSE	0.0115396	-0.429101	FALSE
Chr_4	731425	732325	-	901	XUT0590	2.82669e-18	2.5645	TRUE	3.19537e-13	2.43777	TRUE	FALSE	FALSE	3.13179e-25	2.28594	TRUE	2.3447e-23	2.23415	TRUE
Chr_4	732542	733828	-	1287	XUT0591	9.14006e-53	2.85143	TRUE	5.25501e-30	2.52049	TRUE	TRUE	FALSE	9.66435e-78	2.61797	TRUE	1.32296e-59	2.31334	TRUE
Chr_4	749687	750379	-	693	XUT0592	0.882268	0.101987	FALSE	1.21007e-07	1.36247	TRUE	TRUE	FALSE	0.942898	0.0579618	FALSE	0.291729	-0.334089	FALSE
Chr_4	766369	766884	-	516	XUT0593	0.00513951	1.05628	TRUE	2.37695e-07	2.0888	TRUE	FALSE	FALSE	0.514625	0.455863	FALSE	0.626442	0.247366	FALSE
Chr_4	788064	788832	+	769	XUT0594	8.19786e-15	1.79226	TRUE	1.45139e-19	2.3437	TRUE	TRUE	FALSE	8.79985e-14	1.67889	TRUE	1.06059e-07	1.25678	TRUE
Chr_4	800917	801126	-	210	XUT0595	0.804249	0.152093	FALSE	0.000355099	2.33456	TRUE	FALSE	FALSE	0.214736	1.34087	FALSE	0.0264241	1.92563	TRUE
Chr_4	803347	804256	-	910	XUT0596	1.34665e-06	1.16418	TRUE	5.87106e-16	2.06144	TRUE	FALSE	FALSE	0.000135867	1.07989	TRUE	2.22676e-06	1.31076	TRUE
Chr_4	827196	827591	-	396	XUT0597	0.230821	0.63555	FALSE	5.95207e-06	2.61326	TRUE	FALSE	FALSE	0.290018	0.88511	FALSE	0.000629712	2.06506	TRUE
Chr_4	838280	838819	-	540	XUT0598	0.000809997	1.18614	TRUE	3.5406e-05	1.5733	TRUE	FALSE	FALSE	0.000314064	1.21996	TRUE	1.59117e-05	1.44667	TRUE
Chr_4	841011	841325	-	315	XUT0599	0.141131	0.759358	FALSE	9.65597e-05	1.72248	TRUE	FALSE	FALSE	0.851944	0.326755	FALSE	0.16962	0.991031	FALSE
Chr_4	882629	883390	-	762	XUT0600	8.53439e-16	1.80313	TRUE	6.5688e-17	2.1768	TRUE	FALSE	FALSE	3.40801e-17	1.54297	TRUE	1.24181e-06	0.942594	FALSE
Chr_4	918550	918913	+	364	XUT0601	0.213763	0.829506	FALSE	0.197841	0.897142	FALSE	FALSE	FALSE	0.0590324	1.39526	FALSE	0.00990017	1.73912	TRUE
Chr_4	931858	933384	-	1527	XUT0602	8.11312e-23	3.14608	TRUE	5.93294e-17	2.9471	TRUE	FALSE	FALSE	6.74153e-32	2.85178	TRUE	3.42556e-31	2.85783	TRUE
Chr_4	944900	946956	-	2057	XUT0603	2.64496e-80	3.01755	TRUE	4.8392e-21	1.8355	TRUE	TRUE	FALSE	3.11878e-95	2.86243	TRUE	1.14022e-70	2.47499	TRUE
Chr_4	947157	948153	+	997	XUT0604	5.44686e-08	2.39697	TRUE	8.61687e-11	2.94148	TRUE	TRUE	FALSE	2.09962e-13	2.33867	TRUE	3.03368e-14	2.46499	TRUE
Chr_5	10352	11143	+	792	XUT0606	9.028e-09	2.70287	TRUE	4.68193e-12	3.34802	TRUE	FALSE	FALSE	1.48002e-18	2.49239	TRUE	9.67867e-11	1.92394	TRUE
Chr_5	15847	18556	+	2710	XUT0607	3.3481e-13	1.50557	TRUE	5.57076e-16	1.89631	TRUE	FALSE	FALSE	2.13332e-10	1.4481	TRUE	3.83731e-11	1.51278	TRUE
Chr_5	19716	20197	-	482	XUT0608	0.253673	0.659854	FALSE	0.00787975	1.364	TRUE	FALSE	FALSE	0.00989487	1.39662	TRUE	0.0598389	1.03671	FALSE
Chr_5	32540	33548	-	1009	XUT0609	8.59774e-12	1.29295	TRUE	1.95238e-23	2.13519	TRUE	FALSE	FALSE	1.93687e-08	1.13731	TRUE	1.03069e-08	1.17476	TRUE
Chr_5	41016	41627	-	612	XUT0610	2.39902e-05	1.64705	TRUE	8.52441e-23	3.92606	TRUE	FALSE	FALSE	0.000127333	1.53997	TRUE	0.000289051	1.50215	TRUE
Chr_5	52836	53325	-	490	XUT0611	6.98105e-15	2.64645	TRUE	0.000107466	1.55599	TRUE	FALSE	FALSE	1.87118e-17	2.66217	TRUE	7.46654e-11	2.12793	TRUE
Chr_5	75324	76132	+	809	XUT0612	0.0121328	0.836381	FALSE	5.37249e-12	2.42592	TRUE	FALSE	FALSE	0.00567115	0.89929	FALSE	0.587453	0.223825	FALSE
Chr_5	116486	116736	-	251	XUT0613	0.00257594	2.21521	TRUE	3.45067e-06	3.65827	TRUE	FALSE	FALSE	0.740739	0.681394	FALSE	0.913417	0.130685	FALSE
Chr_5	121924	122942	-	1019	XUT0614	9.97828e-07	1.76053	TRUE	3.19487e-08	2.18757	TRUE	FALSE	FALSE	2.8393e-14	1.88056	TRUE	1.19928e-09	1.5614	TRUE
Chr_5	122028	122799	+	772	XUT0615	0.0204963	1.2111	TRUE	3.81576e-08	2.71817	TRUE	FALSE	FALSE	3.00149e-08	2.13325	TRUE	2.63665e-07	2.04552	TRUE
Chr_5	136667	137408	-	742	XUT0616	0.000325335	1.77036	TRUE	8.05736e-05	2.09133	TRUE	FALSE	FALSE	0.00019112	2.29577	TRUE	0.000253766	2.26259	TRUE
Chr_5	137420	137636	-	217	XUT0617	0.144964	1.17414	FALSE	0.626274	0.372705	FALSE	FALSE	FALSE	0.000423782	2.97443	TRUE	0.00020701	3.12724	TRUE
Chr_5	141057	141829	+	773	XUT0618	0.999162	0.00494436	FALSE	3.36275e-40	1.99209	TRUE	TRUE	FALSE	0.822501	0.133948	FALSE	0.865398	-0.0529765	FALSE
Chr_5	156220	157271	-	1052	XUT0619	8.01141e-14	2.75655	TRUE	2.48379e-14	3.03889	TRUE	FALSE	FALSE	4.22494e-33	3.09223	TRUE	1.56218e-26	2.81219	TRUE
Chr_5	175427	177659	+	2233	XUT0620	0.0340198	0.386525	FALSE	3.74678e-08	1.0487	TRUE	TRUE	FALSE	0.770927	0.114704	FALSE	0.115698	0.286983	FALSE
Chr_5	183051	183896	+	846	XUT0621	4.66407e-44	3.33779	TRUE	4.72704e-16	2.29403	TRUE	TRUE	FALSE	2.64124e-62	2.78396	TRUE	1.97482e-47	2.46104	TRUE
Chr_5	183249	184060	-	812	XUT0622	0.00454297	1.28698	TRUE	0.000469579	1.66018	TRUE	FALSE	FALSE	0.357621	0.476014	FALSE	0.617318	0.223493	FALSE
Chr_5	205844	206586	-	743	XUT0623	1.94442e-10	1.96736	TRUE	1.4368e-09	2.11065	TRUE	FALSE	FALSE	1.6104e-15	2.26509	TRUE	7.00766e-16	2.34048	TRUE
Chr_5	215129	215696	+	568	XUT0624	0.606388	0.366408	FALSE	6.25453e-08	2.52205	TRUE	FALSE	FALSE	0.814393	0.34341	FALSE	0.00929571	1.58442	TRUE
Chr_5	216301	216594	+	294	XUT0625	7.68138e-05	2.86673	TRUE	2.13104e-06	3.52591	TRUE	FALSE	FALSE	0.0101321	2.49402	TRUE	0.00593681	2.60032	TRUE
Chr_5	236480	237130	-	651	XUT0626	3.6908e-13	3.54931	TRUE	4.87055e-22	4.81335	TRUE	TRUE	FALSE	2.04509e-17	3.03703	TRUE	1.28518e-11	2.51821	TRUE
Chr_5	250719	251687	+	969	XUT0627	4.4354e-11	1.98999	TRUE	4.30471e-23	3.16131	TRUE	TRUE	FALSE	5.6319e-18	2.19128	TRUE	1.35702e-15	2.07467	TRUE
Chr_5	264306	265084	+	779	XUT0628	3.7292e-08	2.27495	TRUE	1.76897e-11	2.87682	TRUE	TRUE	FALSE	4.08136e-06	1.71292	TRUE	1.19566e-07	1.96512	TRUE
Chr_5	286598	287331	-	734	XUT0629	0.31598	0.434829	FALSE	1.88153e-21	3.16529	TRUE	TRUE	FALSE	0.307924	0.535574	FALSE	0.378866	0.381543	FALSE
Chr_5	286676	286929	+	254	XUT0630	0.453501	0.597322	FALSE	1.87769e-07	2.64822	TRUE	FALSE	FALSE	0.484427	0.664903	FALSE	0.0280302	1.32987	TRUE
Chr_5	289994	290905	+	912	XUT0631	1.04151e-13	2.28438	TRUE	2.66843e-19	2.95451	TRUE	FALSE	FALSE	1.42934e-13	2.13984	TRUE	1.01064e-15	2.33845	TRUE
Chr_5	312018	313333	+	1316	XUT0633	8.20932e-24	2.13196	TRUE	1.14815e-17	2.10236	TRUE	TRUE	FALSE	1.14607e-13	2.05707	TRUE	2.99486e-24	2.78081	TRUE
Chr_5	323960	324573	+	614	XUT0634	2.02517e-12	2.27987	TRUE	9.95018e-21	3.23198	TRUE	TRUE	FALSE	0.000324957	1.59929	TRUE	1.29559e-08	2.4281	TRUE
Chr_5	357196	359918	+	2723	XUT0636	1.68147e-18	1.15109	TRUE	8.95001e-12	1.07968	TRUE	FALSE	FALSE	5.91725e-07	0.983109	FALSE	7.62733e-09	1.12504	TRUE
Chr_5	365230	366406	-	1177	XUT0637	0.233775	0.589236	FALSE	8.55834e-29	3.66358	TRUE	TRUE	FALSE	0.81	0.1991	FALSE	0.267197	0.429148	FALSE
Chr_5	375528	376106	-	579	XUT0638	2.85177e-06	2.49443	TRUE	3.71451e-09	3.17425	TRUE	FALSE	FALSE	0.00402042	1.94811	TRUE	4.49171e-05	2.63326	TRUE
Chr_5	377800	378253	-	454	XUT0639	5.64226e-07	1.66549	TRUE	1.25561e-12	2.54616	TRUE	FALSE	FALSE	3.86151e-06	2.01654	TRUE	0.000285285	1.65288	TRUE
Chr_5	385489	385801	+	313	XUT0640	0.30562	-0.830414	FALSE	0.00798378	1.6758	TRUE	FALSE	FALSE	0.53499	0.865266	FALSE	0.190016	1.19154	FALSE
Chr_5	399108	400034	+	927	XUT0642	8.17297e-21	2.55343	TRUE	4.25312e-12	2.18265	TRUE	FALSE	FALSE	3.05322e-32	2.311	TRUE	2.04926e-35	2.45606	TRUE
Chr_5	419978	421057	-	1080	XUT0643	7.85946e-07	0.968295	FALSE	2.09249e-15	1.73568	TRUE	TRUE	FALSE	0.000106392	0.929271	FALSE	2.59839e-05	1.00488	TRUE
Chr_5	429302	431063	-	1762	XUT0644	5.36428e-20	2.0782	TRUE	3.826e-32	2.98507	TRUE	TRUE	FALSE	1.35293e-27	2.10873	TRUE	1.27043e-26	2.0976	TRUE
Chr_5	463573	463950	+	378	XUT0645	0.00144345	1.51762	TRUE	1.24254e-09	3.15082	TRUE	FALSE	FALSE	0.111436	1.51975	FALSE	5.721e-05	3.2967	TRUE
Chr_5	505216	506038	+	823	XUT0646	1.76426e-15	1.88798	TRUE	6.67571e-20	2.41977	TRUE	FALSE	FALSE	6.42118e-17	1.69611	TRUE	1.57676e-08	1.2101	TRUE
Chr_5	542885	543372	+	488	XUT0647	0.038418	1.17798	TRUE	5.07835e-07	2.73346	TRUE	FALSE	FALSE	0.089789	1.26488	FALSE	0.140594	1.035	FALSE
Chr_5	570343	572354	-	2012	XUT0649	6.72075e-145	2.80231	TRUE	3.73429e-72	2.39618	TRUE	TRUE	FALSE	2.19136e-67	2.90568	TRUE	2.67865e-71	2.99889	TRUE
Chr_5	574135	574383	-	249	XUT0650	0.195112	0.624672	FALSE	8.73231e-10	2.72683	TRUE	TRUE	FALSE	0.0024523	1.09911	TRUE	0.0426325	0.782757	FALSE
Chr_5	574782	576913	+	2132	XUT0651	0.402781	0.14471	FALSE	1.44065e-18	1.32694	TRUE	FALSE	FALSE	0.322638	-0.220622	FALSE	0.370647	-0.159429	FALSE
Chr_5	577411	581841	-	4431	XUT0652	4.84289e-45	1.98855	TRUE	3.63394e-30	1.94741	TRUE	TRUE	FALSE	3.57835e-35	1.80478	TRUE	4.68159e-29	1.6452	TRUE
Chr_5	581666	582439	+	774	XUT0653	1.10537e-05	1.68151	TRUE	2.70324e-10	2.57027	TRUE	FALSE	FALSE	0.000608591	1.46446	TRUE	0.10495	0.775404	FALSE
Chr_5	583472	584983	+	1512	XUT0654	3.16328e-91	2.65998	TRUE	2.62275e-41	2.15621	TRUE	FALSE	FALSE	3.09172e-62	2.70361	TRUE	1.49503e-56	2.58344	TRUE
Chr_5	588244	588984	-	741	XUT0656	0.00557818	1.10984	TRUE	5.24335e-06	2.00216	TRUE	FALSE	FALSE	0.717718	-0.320509	FALSE	0.53819	0.310802	FALSE
Chr_5	588296	589001	+	706	XUT0657	0.00245733	1.11428	TRUE	0.000101645	1.52762	TRUE	TRUE	FALSE	0.466318	0.434071	FALSE	0.877697	0.0809634	FALSE
Chr_5	589011	589884	-	874	XUT0658	7.76682e-05	0.573147	FALSE	1.11343e-08	0.946627	FALSE	TRUE	FALSE	0.640446	0.143711	FALSE	0.851916	0.0398261	FALSE
Chr_5	612230	612839	+	610	XUT0659	9.83747e-09	2.84671	TRUE	5.86683e-13	3.65379	TRUE	TRUE	FALSE	1.61733e-10	2.63743	TRUE	1.13565e-12	2.94484	TRUE
Chr_5	612950	613689	+	740	XUT0661	0.718783	0.213902	FALSE	8.34686e-09	3.01335	TRUE	FALSE	FALSE	0.778213	0.499343	FALSE	0.906953	0.104267	FALSE
Chr_5	614174	615126	+	953	XUT0662	2.08303e-10	1.89399	TRUE	5.43169e-18	2.74191	TRUE	FALSE	FALSE	0.000839114	0.916756	FALSE	3.797e-05	1.11483	TRUE
Chr_5	620728	621945	+	1218	XUT0663	0.345454	0.418123	FALSE	2.48488e-05	1.47947	TRUE	TRUE	FALSE	0.0653191	0.794652	FALSE	0.0195641	0.925947	FALSE
Chr_5	644756	645119	-	364	XUT0664	0.304498	0.362053	FALSE	0.00669022	0.922457	FALSE	FALSE	FALSE	0.940591	0.264281	FALSE	0.00076695	3.60875	TRUE
Chr_5	649143	649845	+	703	XUT0665	9.53732e-06	1.63491	TRUE	0.000189084	1.52536	TRUE	FALSE	FALSE	0.0143307	0.971148	FALSE	0.00198565	1.15109	TRUE
Chr_5	685751	686561	-	811	XUT0666	1.03689e-05	1.3601	TRUE	7.08718e-06	1.58661	TRUE	FALSE	FALSE	0.0197821	1.42525	TRUE	1.59924e-11	3.49873	TRUE
Chr_5	696808	697204	+	397	XUT0667	0.0239045	1.82994	TRUE	5.01972e-08	4.60182	TRUE	FALSE	FALSE	0.0068133	2.70439	TRUE	0.00956975	2.5263	TRUE
Chr_5	703581	704829	+	1249	XUT0668	6.11384e-07	0.815323	FALSE	1.68906e-15	1.49545	TRUE	TRUE	FALSE	0.00864589	0.490615	FALSE	0.28844	0.211296	FALSE
Chr_5	703780	704722	-	943	XUT0669	1.15706e-08	1.4212	TRUE	1.18392e-16	2.24191	TRUE	FALSE	FALSE	1.69806e-06	1.2192	TRUE	4.75788e-06	1.19192	TRUE
Chr_5	704767	705908	-	1142	XUT0670	6.39601e-59	3.09083	TRUE	3.61093e-25	2.36817	TRUE	TRUE	FALSE	3.27741e-67	2.71858	TRUE	1.62245e-49	2.34673	TRUE
Chr_5	721821	722738	-	918	XUT0671	9.41089e-24	2.35162	TRUE	3.35899e-54	4.01304	TRUE	TRUE	FALSE	5.77735e-22	1.92648	TRUE	1.99915e-22	1.96695	TRUE
Chr_5	742098	742376	-	279	XUT0672	0.0249865	1.50568	TRUE	1.56855e-05	2.72581	TRUE	FALSE	FALSE	0.0298115	2.05022	TRUE	0.159939	1.2854	FALSE
Chr_5	744723	745069	-	347	XUT0673	0.0131906	1.96868	TRUE	3.24975e-06	3.64857	TRUE	FALSE	FALSE	0.154646	1.81726	FALSE	0.0978661	1.83869	FALSE
Chr_5	753335	754011	+	677	XUT0674	3.93212e-07	2.98227	TRUE	3.51722e-06	2.77575	TRUE	FALSE	FALSE	4.0676e-20	2.86668	TRUE	3.66843e-13	2.36968	TRUE
Chr_5	757166	757916	-	751	XUT0675	7.53013e-06	1.98682	TRUE	3.85202e-07	2.37351	TRUE	FALSE	FALSE	0.0396639	0.935298	FALSE	0.13896	0.68069	FALSE
Chr_5	758509	759315	-	807	XUT0676	0.000359806	1.43539	TRUE	8.29529e-07	2.10507	TRUE	FALSE	FALSE	9.89744e-05	2.34377	TRUE	1.58202e-08	3.29763	TRUE
Chr_5	760342	760738	-	397	XUT0677	0.737714	0.184554	FALSE	0.0175381	1.65259	TRUE	FALSE	FALSE	0.978299	-0.104321	FALSE	0.81246	-0.340065	FALSE
Chr_5	763891	766047	+	2157	XUT0678	1.24457e-10	1.90411	TRUE	3.59364e-18	2.81145	TRUE	FALSE	FALSE	0.000300746	1.51863	TRUE	9.30861e-07	1.98752	TRUE
Chr_5	785165	786147	+	983	XUT0680	7.0198e-16	2.20275	TRUE	2.20209e-16	2.49508	TRUE	FALSE	FALSE	1.92688e-38	2.65563	TRUE	5.82685e-34	2.53416	TRUE
Chr_5	787144	787712	+	569	XUT0681	7.11679e-05	2.12761	TRUE	2.51741e-08	3.13445	TRUE	FALSE	FALSE	1.72884e-08	2.53554	TRUE	1.70518e-05	2.03545	TRUE
Chr_5	788162	788428	-	267	XUT0682	0.478357	0.519188	FALSE	0.0432982	1.55104	TRUE	FALSE	FALSE	0.248204	1.52327	FALSE	0.585284	0.607182	FALSE
Chr_5	807940	808877	-	938	XUT0683	0.00190834	1.35539	TRUE	1.68145e-10	2.74675	TRUE	FALSE	FALSE	0.01439	1.0168	TRUE	0.00259369	1.19639	TRUE
Chr_5	816150	816804	+	655	XUT0684	0.851576	0.0653478	FALSE	1.82761e-11	1.34629	TRUE	FALSE	FALSE	0.634686	0.297058	FALSE	0.0113335	0.829893	FALSE
Chr_6	6025	7102	-	1078	XUT0686	0.00035102	1.67201	TRUE	9.06218e-08	2.77044	TRUE	FALSE	FALSE	1.22568e-18	2.05173	TRUE	4.7732e-15	1.87739	TRUE
Chr_6	7533	8069	+	537	XUT0687	0.00100983	1.71138	TRUE	3.38024e-05	2.3197	TRUE	TRUE	FALSE	0.0340833	1.2753	TRUE	0.00901946	1.46922	TRUE
Chr_6	8366	10929	-	2564	XUT0688	6.43796e-35	2.02945	TRUE	3.68725e-18	1.72897	TRUE	FALSE	FALSE	1.04377e-24	1.99627	TRUE	1.27601e-17	1.685	TRUE
Chr_6	55696	56903	+	1208	XUT0689	1.82918e-09	1.74043	TRUE	1.01019e-05	1.48091	TRUE	FALSE	FALSE	1.71428e-15	2.03401	TRUE	4.02045e-14	1.97318	TRUE
Chr_6	58353	58619	+	267	XUT0690	0.432248	0.675549	FALSE	0.00212175	1.86989	TRUE	FALSE	FALSE	0.962452	0.141189	FALSE	0.647547	0.537203	FALSE
Chr_6	71209	71944	-	736	XUT0691	0.0256898	1.20446	TRUE	7.34141e-12	3.32097	TRUE	FALSE	FALSE	0.133179	0.963706	FALSE	0.00361682	1.53166	TRUE
Chr_6	82188	83132	-	945	XUT0692	5.62273e-07	2.78691	TRUE	7.17608e-11	3.68923	TRUE	FALSE	FALSE	7.09699e-15	3.11215	TRUE	1.65229e-12	2.90684	TRUE
Chr_6	82384	83138	+	755	XUT0693	9.35216e-13	2.99658	TRUE	3.81151e-13	3.25699	TRUE	TRUE	FALSE	5.29967e-12	1.8422	TRUE	1.07924e-08	1.59146	TRUE
Chr_6	83437	83841	+	405	XUT0694	0.000244626	2.72441	TRUE	1.45792e-05	3.19481	TRUE	FALSE	FALSE	3.31533e-05	2.38442	TRUE	3.17757e-05	2.41025	TRUE
Chr_6	93226	94242	-	1017	XUT0695	4.19463e-29	2.91466	TRUE	2.12396e-22	2.88047	TRUE	TRUE	FALSE	4.71338e-27	2.68526	TRUE	2.57258e-24	2.56677	TRUE
Chr_6	135680	135896	+	217	XUT0696	1	0.524952	FALSE	0.208724	1.05614	FALSE	FALSE	FALSE	0.619457	1.00732	FALSE	1	1.24803	FALSE
Chr_6	135846	136509	-	664	XUT0697	0.402781	0.759582	FALSE	0.0426823	1.60853	TRUE	FALSE	FALSE	0.96192	0.141462	FALSE	0.48066	0.868	FALSE
Chr_6	153569	153828	-	260	XUT0698	0.739697	-0.160124	FALSE	0.00177081	2.27457	TRUE	FALSE	FALSE	0.0231754	2.4769	TRUE	0.216334	1.29202	FALSE
Chr_6	163115	163527	-	413	XUT0699	0.00744253	1.94658	TRUE	1.2318e-06	3.91037	TRUE	FALSE	FALSE	0.571034	1.05759	FALSE	0.13337	1.81628	FALSE
Chr_6	167810	168312	+	503	XUT0700	0.00449514	1.78647	TRUE	0.000381001	2.23452	TRUE	FALSE	FALSE	0.000240991	2.50956	TRUE	0.00144924	2.22013	TRUE
Chr_6	176248	176839	+	592	XUT0701	0.725574	0.20389	FALSE	0.000223724	2.27108	TRUE	FALSE	FALSE	0.455463	0.945563	FALSE	0.144888	1.2686	FALSE
Chr_6	203689	204389	-	701	XUT0703	2.59598e-08	1.86521	TRUE	5.31292e-12	2.54053	TRUE	FALSE	FALSE	3.23198e-07	1.52315	TRUE	1.89318e-06	1.4683	TRUE
Chr_6	205376	205769	-	394	XUT0704	0.00356894	1.47442	TRUE	0.000125502	2.05134	TRUE	FALSE	FALSE	0.718726	0.371674	FALSE	0.788652	-0.168936	FALSE
Chr_6	209886	210804	-	919	XUT0705	3.53142e-07	2.21767	TRUE	2.19909e-09	2.73697	TRUE	FALSE	FALSE	4.53892e-12	2.4114	TRUE	2.89145e-07	1.87793	TRUE
Chr_6	209908	210685	+	778	XUT0706	1.05398e-05	2.02429	TRUE	2.54203e-09	2.85325	TRUE	FALSE	FALSE	7.28034e-06	1.92762	TRUE	0.000799562	1.51841	TRUE
Chr_6	219962	220381	+	420	XUT0707	0.12554	-0.474101	FALSE	0.278592	-0.424138	FALSE	FALSE	FALSE	0.916711	-0.123975	FALSE	0.848497	0.0915103	FALSE
Chr_6	220736	221179	+	444	XUT0708	3.18689e-05	1.93699	TRUE	7.05223e-05	2.01386	TRUE	TRUE	FALSE	4.58672e-09	2.44593	TRUE	3.47367e-07	2.20549	TRUE
Chr_6	234363	234733	-	371	XUT0709	0.0161063	1.73982	TRUE	2.54541e-05	2.9195	TRUE	FALSE	FALSE	0.00115498	2.554	TRUE	0.00170911	2.46849	TRUE
Chr_6	234854	235733	-	880	XUT0710	1.07746e-11	3.40125	TRUE	2.27411e-11	3.50917	TRUE	TRUE	FALSE	3.14931e-18	3.30429	TRUE	3.39135e-07	2.09648	TRUE
Chr_6	274462	274696	+	235	XUT0711	1	-0.0802339	FALSE	0.658907	0.418794	FALSE	FALSE	FALSE	0.761568	-0.766481	FALSE	0.820013	0.353717	FALSE
Chr_6	275605	277185	+	1581	XUT0712	1.09575e-19	2.61723	TRUE	3.31921e-19	2.83973	TRUE	TRUE	FALSE	1.72343e-36	2.8727	TRUE	9.27403e-28	2.53915	TRUE
Chr_6	341940	343423	+	1484	XUT0713	0.000104322	1.24354	TRUE	5.14886e-06	1.58902	TRUE	FALSE	FALSE	0.0225033	0.731293	FALSE	0.0392105	0.64185	FALSE
Chr_6	344639	345010	-	372	XUT0714	0.0155893	0.742927	FALSE	2.4511e-07	1.55998	TRUE	FALSE	FALSE	0.558467	0.309819	FALSE	0.050063	0.621196	FALSE
Chr_6	373008	373437	+	430	XUT0715	0.664599	0.238035	FALSE	1.10132e-26	3.82821	TRUE	FALSE	FALSE	0.792988	0.364572	FALSE	0.676888	0.320828	FALSE
Chr_6	381108	381574	-	467	XUT0716	0.981038	-0.0950822	FALSE	0.00713789	1.65711	TRUE	FALSE	FALSE	0.999826	0.00705463	FALSE	0.503782	0.618664	FALSE
Chr_6	395081	396052	-	972	XUT0717	3.82631e-16	2.36378	TRUE	1.0647e-12	2.31592	TRUE	FALSE	FALSE	7.47504e-18	2.31522	TRUE	1.29988e-17	2.33007	TRUE
Chr_6	443811	444615	+	805	XUT0718	0.00217746	1.49866	TRUE	0.000119925	2.01628	TRUE	FALSE	FALSE	0.161964	0.845722	FALSE	0.038804	1.05126	TRUE
Chr_6	460451	461403	-	953	XUT0719	2.00976e-09	3.00886	TRUE	8.08779e-09	3.10561	TRUE	FALSE	FALSE	1.36291e-10	2.36099	TRUE	2.39643e-08	2.12913	TRUE
Chr_6	463761	464423	-	663	XUT0720	0.000445763	2.58082	TRUE	1.02878e-06	3.64734	TRUE	FALSE	FALSE	0.0817341	1.4845	FALSE	0.143586	1.17882	FALSE
Chr_6	502045	502327	+	283	XUT0722	0.0598453	1.06332	FALSE	2.22111e-05	2.19941	TRUE	FALSE	FALSE	0.00171326	1.44445	TRUE	0.159007	0.708716	FALSE
Chr_6	503009	503216	-	208	XUT0723	0.0578174	1.44702	FALSE	0.000402097	2.77871	TRUE	FALSE	FALSE	0.792448	-0.684448	FALSE	0.138393	-1.91037	FALSE
Chr_6	506133	507135	-	1003	XUT0724	1.14479e-11	2.52248	TRUE	1.43568e-06	2.032	TRUE	FALSE	FALSE	1.40662e-25	3.16635	TRUE	6.94341e-27	3.27735	TRUE
Chr_6	513494	513994	-	501	XUT0725	5.95287e-08	1.66253	TRUE	1.17094e-14	2.53775	TRUE	TRUE	FALSE	1.01301e-09	1.73759	TRUE	4.87566e-13	2.05481	TRUE
Chr_6	515600	516150	-	551	XUT0726	0.00462604	0.872869	FALSE	8.9749e-05	1.26706	TRUE	TRUE	FALSE	0.162719	0.549082	FALSE	0.0989423	0.56	FALSE
Chr_6	527592	527939	+	348	XUT0727	7.87085e-05	3.21594	TRUE	2.52729e-06	3.89004	TRUE	FALSE	FALSE	3.35743e-08	2.29447	TRUE	4.12416e-06	1.99592	TRUE
Chr_6	574766	575381	+	616	XUT0728	0.0104033	1.00571	TRUE	6.42364e-11	2.56949	TRUE	FALSE	FALSE	0.00217313	1.24088	TRUE	0.0128826	1.04267	TRUE
Chr_6	580289	580515	+	227	XUT0730	1	0.315483	FALSE	0.0781781	1.42712	FALSE	FALSE	FALSE	0.859407	-0.569273	FALSE	1	-0.690113	FALSE
Chr_6	598615	599013	-	399	XUT0731	0.00169363	2.14201	TRUE	1.10407e-05	3.06168	TRUE	FALSE	FALSE	0.00498585	1.60004	TRUE	0.0266745	1.2978	TRUE
Chr_6	611619	612222	-	604	XUT0732	0.0174912	0.826775	FALSE	1.15206e-14	2.55631	TRUE	FALSE	FALSE	0.49444	0.454602	FALSE	0.707222	0.203206	FALSE
Chr_6	616470	617019	+	550	XUT0733	0.535955	0.328856	FALSE	0.00408097	1.34935	TRUE	FALSE	FALSE	0.83538	-0.19865	FALSE	0.857258	-0.0881983	FALSE
Chr_6	624935	626230	+	1296	XUT0734	0.0268885	0.60973	FALSE	5.72126e-06	1.30232	TRUE	FALSE	FALSE	0.874777	-0.125273	FALSE	0.893157	0.0596296	FALSE
Chr_6	666826	668096	+	1271	XUT0735	4.29607e-11	1.73544	TRUE	3.79836e-14	2.24945	TRUE	FALSE	FALSE	3.54612e-08	1.47026	TRUE	2.28361e-06	1.30897	TRUE
Chr_6	673590	673872	-	283	XUT0736	0.926701	-0.126205	FALSE	0.0116206	1.73904	TRUE	TRUE	FALSE	0.294047	-0.364305	FALSE	0.00247784	-0.802256	FALSE
Chr_6	688417	688921	-	505	XUT0737	0.171967	0.691627	FALSE	0.00171071	1.38103	TRUE	TRUE	FALSE	0.013956	1.01616	TRUE	0.910215	0.039994	FALSE
Chr_6	712796	713370	+	575	XUT0739	1.84517e-05	1.88165	TRUE	1.25384e-16	3.5557	TRUE	TRUE	FALSE	5.3511e-05	1.34806	TRUE	6.30083e-11	2.0959	TRUE
Chr_6	714163	714593	-	431	XUT0740	0.488992	0.414423	FALSE	7.62218e-16	3.80826	TRUE	TRUE	FALSE	0.953239	-0.162729	FALSE	0.241912	1.00937	FALSE
Chr_6	714941	715465	-	525	XUT0741	0.0021053	1.86685	TRUE	8.24691e-06	2.7048	TRUE	FALSE	FALSE	0.0937523	1.15393	FALSE	0.0123532	1.49938	TRUE
Chr_6	718737	719209	+	473	XUT0742	0.00181403	1.78465	TRUE	0.00133079	1.90336	TRUE	FALSE	FALSE	4.20096e-05	2.13654	TRUE	0.000458401	1.89509	TRUE
Chr_6	721855	722288	+	434	XUT0743	0.0953188	0.730442	FALSE	0.000943331	1.35633	TRUE	FALSE	FALSE	0.820252	0.282222	FALSE	0.873388	0.0938987	FALSE
Chr_6	723340	723707	-	368	XUT0744	0.0238006	1.83249	TRUE	0.00160493	2.55744	TRUE	FALSE	FALSE	0.631249	0.949798	FALSE	0.466933	0.870379	FALSE
Chr_6	723795	724089	-	295	XUT0745	0.223589	1.01607	FALSE	0.0196505	1.81811	TRUE	FALSE	FALSE	0.732217	0.651459	FALSE	0.0481201	1.92868	TRUE
Chr_6	728659	729679	-	1021	XUT0746	5.56609e-09	1.87262	TRUE	8.55174e-09	2.10107	TRUE	FALSE	FALSE	0.0104747	2.42966	TRUE	2.71672e-06	4.09205	TRUE
Chr_6	732462	732903	+	442	XUT0747	0.917118	-0.0496251	FALSE	0.398873	0.327275	FALSE	FALSE	FALSE	0.186409	0.668689	FALSE	0.13289	0.643119	FALSE
Chr_6	733054	733651	+	598	XUT0748	0.0204978	1.53346	TRUE	2.228e-05	2.95928	TRUE	FALSE	FALSE	0.00204945	2.22148	TRUE	0.0457664	1.50843	TRUE
Chr_6	733376	734139	-	764	XUT0749	6.84462e-12	3.01349	TRUE	1.48903e-12	3.30894	TRUE	FALSE	FALSE	2.61139e-29	2.82142	TRUE	4.37765e-14	1.99557	TRUE
Chr_6	743199	744224	-	1026	XUT0750	1.88567e-08	1.77639	TRUE	8.10614e-07	1.76561	TRUE	TRUE	FALSE	5.93813e-14	2.09287	TRUE	2.01677e-06	1.40984	TRUE
Chr_6	755170	755638	-	469	XUT0751	1.0887e-18	2.16918	TRUE	3.29707e-14	2.16537	TRUE	TRUE	FALSE	9.51997e-18	1.75312	TRUE	1.79997e-07	1.12157	TRUE
Chr_6	756362	756920	+	559	XUT0752	2.80515e-05	2.21666	TRUE	0.000330958	2.03317	TRUE	FALSE	FALSE	0.000240089	1.82648	TRUE	0.00796186	1.38423	TRUE
Chr_6	757037	757711	-	675	XUT0753	8.84136e-57	3.184	TRUE	2.90628e-41	3.13484	TRUE	TRUE	FALSE	3.21871e-66	2.84576	TRUE	6.43029e-55	2.61331	TRUE
Chr_6	768006	769392	+	1387	XUT0754	1.13728e-32	2.55333	TRUE	4.62828e-18	2.19139	TRUE	TRUE	FALSE	6.36366e-44	2.71933	TRUE	3.62933e-45	2.77801	TRUE
Chr_6	779554	779882	-	329	XUT0755	0.0103712	1.76124	TRUE	9.27816e-07	3.29635	TRUE	FALSE	FALSE	0.000802937	2.29844	TRUE	0.00488567	1.9571	TRUE
Chr_6	816822	820182	-	3361	XUT0756	8.04903e-35	2.27504	TRUE	9.885e-27	2.3385	TRUE	TRUE	FALSE	2.09284e-31	1.97526	TRUE	8.46329e-22	1.65142	TRUE
Chr_7	3937	4437	-	501	XUT0757	0.481686	0.482335	FALSE	0.00275804	1.44151	TRUE	FALSE	FALSE	0.558156	0.575622	FALSE	0.922583	0.0637791	FALSE
Chr_7	6203	7334	-	1132	XUT0758	2.37489e-87	3.46331	TRUE	1.72827e-12	1.53693	TRUE	TRUE	FALSE	3.49772e-84	3.02637	TRUE	3.4771e-68	2.73574	TRUE
Chr_7	6731	7354	+	624	XUT0759	1.69661e-12	2.55351	TRUE	1.40196e-07	2.15894	TRUE	FALSE	FALSE	8.3991e-23	2.68046	TRUE	1.81822e-14	2.1629	TRUE
Chr_7	10568	11417	-	850	XUT0760	0.0144383	1.05632	TRUE	1.50679e-08	2.33933	TRUE	FALSE	FALSE	0.0642146	0.853399	FALSE	0.14242	0.636758	FALSE
Chr_7	67785	68090	-	306	XUT0761	0.0114214	1.66176	TRUE	1.64954e-05	2.72505	TRUE	FALSE	FALSE	0.827153	0.432063	FALSE	0.15101	1.19948	FALSE
Chr_7	96243	99980	-	3738	XUT0762	7.02582e-31	1.74408	TRUE	7.76638e-33	2.13758	TRUE	FALSE	FALSE	1.45034e-19	1.48705	TRUE	2.36564e-22	1.60248	TRUE
Chr_7	119958	120579	+	622	XUT0763	0.0338256	0.869236	FALSE	7.93966e-06	1.77184	TRUE	TRUE	FALSE	0.0108057	1.1157	TRUE	0.000676536	1.39701	TRUE
Chr_7	120852	121531	+	680	XUT0764	2.07805e-06	1.42305	TRUE	5.36095e-11	2.07503	TRUE	FALSE	FALSE	0.00409789	0.882799	FALSE	0.00284797	0.899874	FALSE
Chr_7	124870	125420	-	551	XUT0765	1.04004e-06	2.5981	TRUE	1.62698e-05	2.47144	TRUE	FALSE	FALSE	4.91733e-10	2.3907	TRUE	1.67252e-11	2.61516	TRUE
Chr_7	127918	128859	-	942	XUT0766	5.51243e-05	1.47632	TRUE	0.000197739	1.49386	TRUE	FALSE	FALSE	1.07092e-06	1.85905	TRUE	1.21083e-06	1.86288	TRUE
Chr_7	129559	129931	-	373	XUT0767	0.000648934	2.54266	TRUE	0.0136784	1.84818	TRUE	FALSE	FALSE	1.09731e-06	3.26365	TRUE	1.35781e-05	2.96343	TRUE
Chr_7	132356	133941	-	1586	XUT0768	9.4153e-12	2.55469	TRUE	2.02746e-10	2.63076	TRUE	FALSE	FALSE	3.11999e-08	2.29172	TRUE	9.28658e-16	3.25176	TRUE
Chr_7	140238	141990	-	1753	XUT0769	0.111658	0.25701	FALSE	6.52486e-06	0.723638	FALSE	FALSE	FALSE	0.198945	-0.245945	FALSE	4.68978e-05	-0.590705	FALSE
Chr_7	155170	156387	+	1218	XUT0770	0.00125061	1.16835	TRUE	7.19743e-18	3.09119	TRUE	FALSE	FALSE	8.24085e-06	1.55407	TRUE	7.59459e-05	1.42346	TRUE
Chr_7	157525	157812	+	288	XUT0771	0.133954	1.13481	FALSE	2.25685e-09	4.52869	TRUE	FALSE	FALSE	0.645393	0.812872	FALSE	0.153472	1.49072	FALSE
Chr_7	159224	159951	-	728	XUT0772	0.00501186	1.14423	TRUE	6.33226e-14	3.0123	TRUE	FALSE	FALSE	0.0752401	1.40339	FALSE	0.0621065	1.34148	FALSE
Chr_7	173894	174647	+	754	XUT0773	1.72684e-07	2.13066	TRUE	1.86527e-13	3.08146	TRUE	FALSE	FALSE	0.00144258	1.15289	TRUE	0.000377381	1.26591	TRUE
Chr_7	176012	176563	+	552	XUT0774	0.164009	0.97706	FALSE	1.46429e-06	2.86998	TRUE	FALSE	FALSE	0.526758	-0.617685	FALSE	0.664531	-0.288878	FALSE
Chr_7	186584	187249	-	666	XUT0775	1.92564e-05	2.37902	TRUE	3.40306e-13	4.1116	TRUE	FALSE	FALSE	1.91714e-05	2.18721	TRUE	8.5804e-07	2.51464	TRUE
Chr_7	188430	188642	+	213	XUT0776	0.928432	-0.0725834	FALSE	0.876725	0.112556	FALSE	FALSE	FALSE	0.915849	-0.267466	FALSE	0.790711	-0.250472	FALSE
Chr_7	189916	190139	+	224	XUT0777	0.921428	0.144148	FALSE	0.133531	1.05139	FALSE	FALSE	FALSE	0.736418	-0.755531	FALSE	0.610382	-0.684933	FALSE
Chr_7	214211	214511	-	301	XUT0778	0.85732	0.0565085	FALSE	9.12013e-05	2.45952	TRUE	FALSE	FALSE	0.60025	0.846711	FALSE	0.332875	0.973251	FALSE
Chr_7	240746	241069	+	324	XUT0779	0.987793	0.0671953	FALSE	0.243301	0.662515	FALSE	FALSE	FALSE	0.864218	0.202754	FALSE	0.597258	0.301437	FALSE
Chr_7	252368	254478	-	2111	XUT0780	9.80293e-22	1.77244	TRUE	1.68215e-24	2.17629	TRUE	TRUE	FALSE	1.88261e-16	1.73288	TRUE	1.9041e-13	1.57696	TRUE
Chr_7	258281	258613	-	333	XUT0781	1	1.4114	FALSE	0.00220369	2.69106	TRUE	FALSE	FALSE	0.96192	-0.181437	FALSE	0.643904	-0.721542	FALSE
Chr_7	277282	278027	-	746	XUT0782	0.000721114	1.96092	TRUE	1.91436e-10	3.54595	TRUE	FALSE	FALSE	0.242473	0.804918	FALSE	0.18951	0.756812	FALSE
Chr_7	297586	298221	+	636	XUT0783	0.000591646	2.62952	TRUE	8.35866e-05	3.02644	TRUE	FALSE	FALSE	0.0284467	1.55708	TRUE	0.0755307	1.23566	FALSE
Chr_7	298395	299118	+	724	XUT0784	0.0126295	1.48001	TRUE	0.00454895	1.7307	TRUE	FALSE	FALSE	0.0130978	1.4093	TRUE	0.00539553	1.54144	TRUE
Chr_7	299514	299769	+	256	XUT0785	1	0.74253	FALSE	0.00198103	2.59755	TRUE	FALSE	FALSE	0.474417	-1.54098	FALSE	1	-1.87857	FALSE
Chr_7	299837	300820	+	984	XUT0786	0.339103	0.787108	FALSE	6.30333e-08	4.09559	TRUE	TRUE	FALSE	0.889819	0.390179	FALSE	0.203259	1.35985	FALSE
Chr_7	300758	301806	-	1049	XUT0787	6.90331e-45	3.63565	TRUE	1.09936e-20	2.81808	TRUE	FALSE	FALSE	4.51139e-81	3.1093	TRUE	7.35478e-65	2.81185	TRUE
Chr_7	302051	302994	-	944	XUT0788	2.08553e-92	3.2359	TRUE	2.63647e-33	2.30361	TRUE	TRUE	FALSE	1.13245e-76	2.99406	TRUE	2.09132e-64	2.75717	TRUE
Chr_7	318510	319487	-	978	XUT0789	2.38825e-06	2.73231	TRUE	6.93239e-09	3.47085	TRUE	FALSE	FALSE	9.8926e-06	2.59411	TRUE	8.12887e-11	3.74444	TRUE
Chr_7	329696	330262	-	567	XUT0790	0.98147	0.199144	FALSE	0.00457208	2.1379	TRUE	FALSE	FALSE	0.15822	1.97161	FALSE	0.709873	0.519261	FALSE
Chr_7	331324	332033	-	710	XUT0791	1.4465e-15	2.06982	TRUE	2.56319e-12	2.08835	TRUE	TRUE	FALSE	1.51286e-15	1.62045	TRUE	4.02094e-11	1.38281	TRUE
Chr_7	331859	333912	+	2054	XUT0792	0.0418766	0.340352	FALSE	4.2806e-10	1.04416	TRUE	TRUE	FALSE	0.991656	-0.0052813	FALSE	0.877819	-0.0293718	FALSE
Chr_7	334139	335395	-	1257	XUT0793	5.98221e-12	2.49898	TRUE	1.26498e-11	2.67024	TRUE	FALSE	FALSE	1.70613e-09	2.32975	TRUE	1.63062e-11	2.606	TRUE
Chr_7	336676	337150	+	475	XUT0794	7.90708e-06	2.20746	TRUE	5.88417e-09	3.04536	TRUE	FALSE	FALSE	1.65692e-06	2.20838	TRUE	1.94803e-06	2.2453	TRUE
Chr_7	337416	337776	-	361	XUT0795	1	0	FALSE	0.732765	0.757179	FALSE	FALSE	FALSE	NA	NA	NA	NA	NA	NA
Chr_7	350089	350594	+	506	XUT0796	0.171833	1.21615	FALSE	3.50456e-07	3.37038	TRUE	FALSE	FALSE	0.00253082	2.43796	TRUE	0.00194651	2.49437	TRUE
Chr_7	359734	360440	+	707	XUT0797	0.00167452	1.56492	TRUE	4.13189e-08	2.78595	TRUE	FALSE	FALSE	0.00537815	1.69104	TRUE	0.000259559	2.11628	TRUE
Chr_7	370348	370573	+	226	XUT0798	0.159108	1.04757	FALSE	0.000843621	2.2684	TRUE	FALSE	FALSE	0.0363064	2.12975	TRUE	0.0393891	1.99174	TRUE
Chr_7	370602	370862	+	261	XUT0799	0.0152124	1.89381	TRUE	0.000101446	2.96471	TRUE	FALSE	FALSE	0.0289698	2.39714	TRUE	0.00834833	2.7642	TRUE
Chr_7	379997	380861	+	865	XUT0800	1.12718e-09	1.32477	TRUE	5.61759e-05	1.03824	TRUE	TRUE	FALSE	9.27196e-11	1.4555	TRUE	1.22312e-08	1.30918	TRUE
Chr_7	388247	389272	-	1026	XUT0801	7.47229e-05	0.941496	FALSE	2.5772e-17	2.06937	TRUE	FALSE	FALSE	0.00327676	0.869351	FALSE	0.000162548	1.07363	TRUE
Chr_7	404331	404877	-	547	XUT0803	0.00108093	2.05674	TRUE	2.33078e-05	2.64522	TRUE	FALSE	FALSE	0.00775136	1.53397	TRUE	0.0141416	1.42627	TRUE
Chr_7	412461	412992	+	532	XUT0804	2.97216e-08	1.38788	TRUE	1.02348e-06	1.39538	TRUE	TRUE	FALSE	1.78718e-12	1.52691	TRUE	8.83608e-11	1.44511	TRUE
Chr_7	415590	416118	+	529	XUT0805	3.32756e-55	2.34186	TRUE	1.07157e-19	1.66395	TRUE	TRUE	FALSE	4.31095e-36	1.99773	TRUE	9.49834e-28	1.75906	TRUE
Chr_7	446711	449300	-	2590	XUT0806	3.7741e-24	1.4293	TRUE	2.2857e-16	1.39558	TRUE	TRUE	FALSE	3.20612e-12	1.23653	TRUE	4.57298e-17	1.4804	TRUE
Chr_7	456768	457309	-	542	XUT0807	0.0108178	1.17441	TRUE	4.04863e-16	3.24357	TRUE	TRUE	FALSE	0.00118661	1.82683	TRUE	1.69766e-08	2.99008	TRUE
Chr_7	500886	501512	-	627	XUT0808	0.480262	0.36359	FALSE	0.00105454	1.22741	TRUE	FALSE	FALSE	0.940591	0.0831915	FALSE	0.300157	0.424548	FALSE
Chr_7	514168	514459	+	292	XUT0809	0.00144835	1.63363	TRUE	4.36268e-12	3.56226	TRUE	FALSE	FALSE	0.0446049	1.43716	TRUE	0.0240225	1.51641	TRUE
Chr_7	521296	522373	-	1078	XUT0810	8.72991e-05	0.880676	FALSE	8.19059e-08	1.30451	TRUE	FALSE	FALSE	0.213552	0.504834	FALSE	0.00114212	1.00186	TRUE
Chr_7	548138	548510	+	373	XUT0811	0.00850772	1.92464	TRUE	0.000134573	2.80703	TRUE	FALSE	FALSE	0.0845423	1.61445	FALSE	0.0906689	1.46182	FALSE
Chr_7	548948	549378	+	431	XUT0812	0.481596	0.539266	FALSE	3.80906e-07	2.6739	TRUE	FALSE	FALSE	0.997335	-0.00501061	FALSE	0.904981	-0.112143	FALSE
Chr_7	568367	568571	-	205	XUT0813	0.117449	1.35744	FALSE	0.00684247	2.2432	TRUE	FALSE	FALSE	0.83806	0.615485	FALSE	0.851916	-0.24068	FALSE
Chr_7	569798	570169	-	372	XUT0814	0.391812	0.687116	FALSE	4.51599e-13	4.03763	TRUE	FALSE	FALSE	0.094926	1.72672	FALSE	0.13551	1.43899	FALSE
Chr_7	584654	585165	+	512	XUT0815	0.00273295	1.53752	TRUE	5.74782e-05	2.24198	TRUE	FALSE	FALSE	0.0964101	1.158	FALSE	0.970946	0.0237389	FALSE
Chr_7	589913	590262	+	350	XUT0816	7.03512e-05	1.45839	TRUE	5.64957e-08	2.14311	TRUE	FALSE	FALSE	0.105457	0.60468	FALSE	0.0876601	0.575153	FALSE
Chr_7	590814	591303	+	490	XUT0817	0.218663	0.571065	FALSE	0.000615419	1.706	TRUE	TRUE	FALSE	0.00101596	1.7433	TRUE	0.0507787	1.10818	FALSE
Chr_7	597419	597636	-	218	XUT0818	1	0.918963	FALSE	0.207035	1.25118	FALSE	FALSE	FALSE	0.22523	1.78855	FALSE	0.223386	1.50009	FALSE
Chr_7	609190	609501	-	312	XUT0819	0.198969	0.847202	FALSE	7.98286e-06	2.61166	TRUE	FALSE	FALSE	0.858497	0.381724	FALSE	0.200361	1.28212	FALSE
Chr_7	646103	646867	+	765	XUT0820	0.000212844	1.08844	TRUE	6.08517e-18	2.57505	TRUE	FALSE	FALSE	0.00595511	0.993097	FALSE	5.14674e-05	1.36563	TRUE
Chr_7	648671	648893	+	223	XUT0821	0.878222	0.175856	FALSE	0.173396	0.927834	FALSE	FALSE	FALSE	0.953285	0.150716	FALSE	0.429241	0.896293	FALSE
Chr_7	650207	650994	+	788	XUT0822	1.1411e-05	2.40485	TRUE	5.28951e-11	3.62357	TRUE	TRUE	FALSE	2.04141e-05	2.05821	TRUE	1.05206e-09	2.85622	TRUE
Chr_7	662010	662753	-	744	XUT0823	4.12359e-07	1.91852	TRUE	1.00406e-13	2.93013	TRUE	FALSE	FALSE	8.16374e-08	1.63665	TRUE	1.70788e-05	1.38171	TRUE
Chr_7	681416	681842	+	427	XUT0824	0.34616	0.733533	FALSE	0.154423	1.05024	FALSE	FALSE	FALSE	0.724124	-0.870518	FALSE	0.719137	-0.490223	FALSE
Chr_7	691831	692102	-	272	XUT0825	0.00732409	1.56722	TRUE	0.0019678	1.89623	TRUE	FALSE	FALSE	0.00130584	1.75414	TRUE	0.00230914	1.70054	TRUE
Chr_7	696371	696926	+	556	XUT0826	0.0591115	0.606181	FALSE	3.3167e-05	1.32873	TRUE	FALSE	FALSE	0.123362	0.405766	FALSE	0.900597	0.0413264	FALSE
Chr_7	707493	707983	+	491	XUT0827	0.248366	0.711653	FALSE	0.0104313	1.25875	TRUE	FALSE	FALSE	0.850147	0.221882	FALSE	0.271914	0.535491	FALSE
Chr_7	712142	712575	-	434	XUT0829	0.000127058	1.88397	TRUE	1.75864e-06	2.45454	TRUE	FALSE	FALSE	0.00119186	1.54008	TRUE	0.00312549	1.44039	TRUE
Chr_7	716687	717334	-	648	XUT0830	0.000254082	1.55409	TRUE	0.0010589	1.48931	TRUE	FALSE	FALSE	0.0101701	1.16637	TRUE	0.00725177	1.19313	TRUE
Chr_7	726093	727093	-	1001	XUT0831	0.0418639	0.626881	FALSE	0.000169026	1.16023	TRUE	FALSE	FALSE	0.852091	0.145588	FALSE	0.0304916	0.65338	FALSE
Chr_7	738391	739214	+	824	XUT0832	5.49308e-08	2.55551	TRUE	2.95958e-22	4.51619	TRUE	FALSE	FALSE	6.1894e-08	2.02918	TRUE	9.91415e-10	2.29597	TRUE
Chr_7	747335	747930	-	596	XUT0833	0.00207255	1.60217	TRUE	1.77575e-05	2.34478	TRUE	FALSE	FALSE	6.31834e-08	2.46728	TRUE	5.69615e-08	2.52662	TRUE
Chr_7	748263	748537	-	275	XUT0834	0.208512	0.770266	FALSE	0.00586402	1.55195	TRUE	FALSE	FALSE	0.0244116	1.56935	TRUE	0.00349444	1.90048	TRUE
Chr_7	751938	752855	-	918	XUT0835	2.5038e-10	2.05396	TRUE	8.47615e-13	2.53858	TRUE	FALSE	FALSE	8.80395e-05	1.65817	TRUE	0.000405383	1.51286	TRUE
Chr_7	775360	775600	+	241	XUT0836	0.302082	0.842784	FALSE	0.0271322	1.60212	TRUE	FALSE	FALSE	0.149062	1.51345	FALSE	0.207177	1.18815	FALSE
Chr_7	787823	788709	+	887	XUT0837	2.44785e-32	2.14386	TRUE	1.63712e-15	1.73913	TRUE	TRUE	FALSE	2.04087e-28	1.823	TRUE	1.91121e-20	1.55417	TRUE
Chr_7	788761	790008	-	1248	XUT0838	6.83833e-14	1.90732	TRUE	5.3321e-27	2.98482	TRUE	FALSE	FALSE	1.43526e-17	2.00797	TRUE	3.49952e-11	1.61069	TRUE
Chr_7	796126	796672	-	547	XUT0839	0.2824	0.710279	FALSE	0.000558297	1.82945	TRUE	FALSE	FALSE	0.710014	1.04758	FALSE	0.973072	0.00627284	FALSE
Chr_7	797624	798312	+	689	XUT0840	0.809554	-0.0486878	FALSE	1.11023e-09	1.24011	TRUE	TRUE	FALSE	0.177592	-0.320555	FALSE	0.00342901	-0.562321	FALSE
Chr_8	328	624	+	297	XUT0841	0.394873	0.413053	FALSE	0.0935973	0.641006	FALSE	FALSE	FALSE	0.419346	0.328847	FALSE	0.0611197	0.524501	FALSE
Chr_8	4757	10738	+	5982	XUT0842	5.14339e-30	1.73029	TRUE	1.08797e-23	1.83724	TRUE	TRUE	FALSE	4.81578e-24	1.43149	TRUE	3.90586e-15	1.13194	TRUE
Chr_8	11798	12522	+	725	XUT0844	1.6538e-09	1.62883	TRUE	1.82713e-06	1.51597	TRUE	FALSE	FALSE	8.59274e-11	1.24523	TRUE	0.000101761	0.807895	FALSE
Chr_8	12310	13748	-	1439	XUT0845	1.01019e-59	2.89687	TRUE	6.63269e-27	2.29986	TRUE	FALSE	FALSE	2.88221e-78	2.64602	TRUE	2.19287e-59	2.31889	TRUE
Chr_8	13821	14210	-	390	XUT0846	9.76683e-06	2.20191	TRUE	1.66857e-05	2.26356	TRUE	TRUE	FALSE	3.02161e-10	2.49394	TRUE	4.9527e-10	2.5134	TRUE
Chr_8	16573	18647	+	2075	XUT0847	5.07233e-68	2.74167	TRUE	5.11566e-40	2.47364	TRUE	TRUE	FALSE	4.52537e-69	2.51802	TRUE	1.01461e-44	2.04374	TRUE
Chr_8	19860	21434	+	1575	XUT0848	1.0205e-86	3.32531	TRUE	7.35672e-40	2.65613	TRUE	FALSE	FALSE	4.41609e-74	2.9402	TRUE	3.44709e-57	2.59493	TRUE
Chr_8	22423	23328	-	906	XUT0849	2.80391e-96	3.61047	TRUE	9.96957e-28	2.27906	TRUE	FALSE	FALSE	6.43256e-86	3.47967	TRUE	1.37258e-76	3.30863	TRUE
Chr_8	27200	27488	+	289	XUT0850	0.18324	0.991048	FALSE	0.0302288	1.58628	TRUE	FALSE	FALSE	0.42722	1.16651	FALSE	0.0608331	1.95678	FALSE
Chr_8	41494	42947	-	1454	XUT0851	1.48169e-22	2.00915	TRUE	5.23187e-37	2.96564	TRUE	TRUE	FALSE	1.28287e-17	1.60813	TRUE	8.9285e-11	1.25076	TRUE
Chr_8	48462	49464	+	1003	XUT0852	4.1019e-70	2.45226	TRUE	1.25876e-59	2.65974	TRUE	TRUE	FALSE	1.53321e-62	2.23908	TRUE	2.35106e-56	2.14003	TRUE
Chr_8	59032	59540	+	509	XUT0853	0.0587684	0.875764	FALSE	3.40298e-05	1.76028	TRUE	FALSE	FALSE	0.327551	0.521936	FALSE	0.519442	0.277155	FALSE
Chr_8	59095	60522	-	1428	XUT0854	6.14378e-11	1.59559	TRUE	2.15648e-29	2.90859	TRUE	TRUE	FALSE	5.04475e-06	1.15769	TRUE	5.09369e-05	1.05982	TRUE
Chr_8	60079	60338	+	260	XUT0855	0.0735311	1.51243	FALSE	0.0410437	1.70964	TRUE	FALSE	FALSE	0.150343	1.83765	FALSE	0.0420975	2.2963	TRUE
Chr_8	72317	73007	-	691	XUT0856	1.32067e-17	1.99954	TRUE	3.99822e-26	2.78464	TRUE	TRUE	FALSE	9.87133e-25	1.87456	TRUE	1.25973e-22	1.82024	TRUE
Chr_8	73138	73403	+	266	XUT0857	0.912041	0.0728819	FALSE	0.0194677	1.08914	TRUE	FALSE	FALSE	0.824309	-0.245859	FALSE	0.134865	-0.766742	FALSE
Chr_8	76120	77096	+	977	XUT0858	0.00221836	1.35277	TRUE	5.98159e-06	2.10167	TRUE	FALSE	FALSE	0.0761718	1.10284	FALSE	6.03924e-06	2.30948	TRUE
Chr_8	83398	85474	+	2077	XUT0859	0.720383	-0.066115	FALSE	8.13838e-09	0.828394	FALSE	FALSE	FALSE	0.538867	-0.239876	FALSE	0.0618506	0.445066	FALSE
Chr_8	85177	86706	-	1530	XUT0860	0.0987428	0.512265	FALSE	0.000198489	1.21592	TRUE	FALSE	FALSE	0.162251	0.709339	FALSE	8.34929e-07	1.87454	TRUE
Chr_8	91017	91708	+	692	XUT0861	2.40982e-05	1.62878	TRUE	0.0285263	1.01862	TRUE	FALSE	FALSE	0.000289411	1.12876	TRUE	0.00216536	0.987799	FALSE
Chr_8	91823	92083	+	261	XUT0862	0.0700335	1.12725	FALSE	0.0174076	1.4687	TRUE	FALSE	FALSE	0.15146	1.13132	FALSE	0.0794221	1.21698	FALSE
Chr_8	92310	92543	+	234	XUT0863	0.00197036	2.23941	TRUE	8.11447e-07	3.78191	TRUE	FALSE	FALSE	0.035666	1.61325	TRUE	0.0628277	1.4094	FALSE
Chr_8	92585	92912	-	328	XUT0864	0.00707711	1.00658	TRUE	2.66861e-14	2.90063	TRUE	FALSE	FALSE	0.978299	0.0391773	FALSE	0.703007	-0.18136	FALSE
Chr_8	122342	122598	-	257	XUT0865	0.0271786	1.69509	TRUE	0.000490768	2.66586	TRUE	FALSE	FALSE	0.263555	1.4504	FALSE	0.0800026	1.78237	FALSE
Chr_8	122671	123133	-	463	XUT0866	0.0200313	1.70548	TRUE	0.165118	1.05401	FALSE	FALSE	FALSE	0.0155947	1.8777	TRUE	0.0048824	2.10635	TRUE
Chr_8	124440	124974	-	535	XUT0867	0.584579	0.447186	FALSE	4.97618e-06	2.56386	TRUE	FALSE	FALSE	0.20596	1.07092	FALSE	0.00906431	1.72143	TRUE
Chr_8	135395	136426	-	1032	XUT0868	0.00353367	1.80928	TRUE	2.96867e-07	3.07006	TRUE	FALSE	FALSE	2.34304e-06	2.15528	TRUE	1.07877e-09	2.75085	TRUE
Chr_8	146357	146880	+	524	XUT0869	7.66917e-10	2.5693	TRUE	9.07884e-12	3.08027	TRUE	TRUE	FALSE	4.32281e-08	1.82321	TRUE	2.60159e-06	1.62294	TRUE
Chr_8	164187	165411	+	1225	XUT0871	1.54351e-84	2.97668	TRUE	5.18825e-45	2.54821	TRUE	TRUE	FALSE	3.43935e-75	2.94998	TRUE	6.06935e-62	2.69365	TRUE
Chr_8	169079	169415	-	337	XUT0872	0.379255	0.56041	FALSE	0.0768118	1.27662	FALSE	FALSE	FALSE	0.513909	-0.857504	FALSE	0.849815	0.18876	FALSE
Chr_8	175470	176374	+	905	XUT0873	5.18674e-15	2.87293	TRUE	1.62439e-13	2.9211	TRUE	FALSE	FALSE	3.52025e-19	2.5479	TRUE	9.73485e-18	2.49342	TRUE
Chr_8	181982	183580	-	1599	XUT0874	1.26012e-77	3.36082	TRUE	1.56373e-48	3.07181	TRUE	FALSE	FALSE	4.90887e-81	3.01526	TRUE	3.72139e-57	2.54795	TRUE
Chr_8	213541	215875	+	2335	XUT0876	1.86013e-35	1.69414	TRUE	1.59801e-26	1.76079	TRUE	TRUE	FALSE	3.14517e-13	1.58927	TRUE	2.47901e-24	2.19016	TRUE
Chr_8	275458	276116	-	659	XUT0877	1.74131e-09	2.07379	TRUE	2.96043e-20	3.33126	TRUE	FALSE	FALSE	9.63654e-05	1.48275	TRUE	2.02618e-07	1.93789	TRUE
Chr_8	289144	289797	+	654	XUT0878	2.4674e-09	1.55966	TRUE	7.87716e-09	1.70671	TRUE	TRUE	FALSE	0.000719199	1.19287	TRUE	0.0165851	0.873066	FALSE
Chr_8	290483	291044	+	562	XUT0879	0.952577	-0.0070691	FALSE	0.104544	0.758446	FALSE	FALSE	FALSE	0.597327	0.468192	FALSE	0.406652	0.459275	FALSE
Chr_8	298668	299562	-	895	XUT0880	1.19595e-45	2.3384	TRUE	4.01511e-30	2.25192	TRUE	TRUE	FALSE	2.65013e-36	1.9502	TRUE	1.08843e-31	1.8333	TRUE
Chr_8	302879	303264	-	386	XUT0881	9.44238e-08	2.03515	TRUE	2.74051e-15	3.09015	TRUE	TRUE	FALSE	0.00312179	1.06592	TRUE	0.00286235	1.07768	TRUE
Chr_8	304648	306015	-	1368	XUT0882	1.66686e-48	2.84508	TRUE	4.21869e-49	3.26849	TRUE	TRUE	FALSE	4.81134e-58	2.45014	TRUE	6.52829e-44	2.1501	TRUE
Chr_8	313007	313322	+	316	XUT0884	0.0190722	0.982047	FALSE	3.72972e-10	2.45675	TRUE	FALSE	FALSE	0.842907	0.190966	FALSE	0.971385	-0.0129822	FALSE
Chr_8	321830	322277	+	448	XUT0885	0.0143516	1.03951	TRUE	0.00120672	1.42376	TRUE	FALSE	FALSE	0.416653	0.558082	FALSE	0.896516	0.057161	FALSE
Chr_8	364410	364784	-	375	XUT0886	0.364156	0.585002	FALSE	0.000106456	2.15294	TRUE	FALSE	FALSE	0.763109	0.355278	FALSE	0.0349488	-1.29102	FALSE
Chr_8	365238	367295	+	2058	XUT0887	7.99239e-07	1.18846	TRUE	3.25414e-07	1.39271	TRUE	FALSE	FALSE	0.00152902	0.752722	FALSE	0.0143894	0.599744	FALSE
Chr_8	372334	373258	+	925	XUT0888	1.5129e-05	1.54499	TRUE	1.91958e-15	2.93603	TRUE	FALSE	FALSE	6.47783e-07	1.71362	TRUE	2.2501e-05	1.50834	TRUE
Chr_8	373427	374711	+	1285	XUT0889	3.4017e-06	1.31814	TRUE	2.19453e-08	1.74059	TRUE	FALSE	FALSE	1.26724e-06	1.08606	TRUE	6.64205e-05	0.937409	FALSE
Chr_8	391052	391584	+	533	XUT0890	0.00105208	1.61762	TRUE	2.48374e-06	2.3324	TRUE	FALSE	FALSE	4.95956e-07	2.58089	TRUE	2.92959e-07	2.65615	TRUE
Chr_8	401874	402360	+	487	XUT0891	1.88665e-27	1.87071	TRUE	5.51003e-33	2.39735	TRUE	TRUE	FALSE	2.40524e-15	1.465	TRUE	2.40718e-14	1.43596	TRUE
Chr_8	402388	402724	-	337	XUT0892	0.101493	1.1999	FALSE	0.0187625	1.62361	TRUE	FALSE	FALSE	0.761049	0.518075	FALSE	0.814331	-0.214433	FALSE
Chr_8	465619	466114	+	496	XUT0894	0.000166472	1.87337	TRUE	1.42173e-12	3.63771	TRUE	FALSE	FALSE	1.31029e-09	2.49125	TRUE	2.30309e-05	1.85265	TRUE
Chr_8	477047	477540	+	494	XUT0895	0.224411	0.828541	FALSE	8.93769e-05	2.40524	TRUE	FALSE	FALSE	0.270551	1.28995	FALSE	0.0231448	2.113	TRUE
Chr_8	480715	481001	-	287	XUT0896	1	0.116209	FALSE	0.408631	0.726349	FALSE	FALSE	FALSE	0.954217	-0.263716	FALSE	1	-0.0616563	FALSE
Chr_8	523463	523986	+	524	XUT0897	0.0010979	1.74107	TRUE	5.81421e-05	2.28574	TRUE	FALSE	FALSE	0.0711156	1.1184	FALSE	7.40307e-05	2.09994	TRUE
Chr_8	538063	538566	-	504	XUT0898	0.000857141	2.24814	TRUE	1.1341e-07	3.63288	TRUE	FALSE	FALSE	0.00538313	1.4493	TRUE	0.0891599	0.936092	FALSE
Chr_8	562288	562791	-	504	XUT0899	8.23709e-05	2.60627	TRUE	1.70483e-09	4.07381	TRUE	FALSE	FALSE	0.405099	0.814548	FALSE	0.0108187	1.67242	TRUE
Chr_8	572204	572962	+	759	XUT0900	0.00060366	0.752452	FALSE	1.17887e-10	1.51746	TRUE	TRUE	FALSE	0.258695	0.431696	FALSE	0.252696	0.363285	FALSE
Chr_8	581484	582268	+	785	XUT0901	0.0369188	1.00573	TRUE	0.000381024	1.69047	TRUE	FALSE	FALSE	0.0343018	1.1001	TRUE	0.149294	0.754138	FALSE
Chr_8	595191	595641	+	451	XUT0902	0.212855	0.641451	FALSE	0.0583657	0.890661	FALSE	FALSE	FALSE	0.686472	0.544041	FALSE	0.12435	1.04928	FALSE
Chr_8	627761	628201	-	441	XUT0903	0.91315	0.127974	FALSE	1.94108e-05	2.86657	TRUE	FALSE	FALSE	0.0560254	2.11498	FALSE	0.115818	1.61293	FALSE
Chr_8	631116	631579	-	464	XUT0904	0.0461587	1.26187	TRUE	0.000770994	2.02117	TRUE	FALSE	FALSE	0.212248	1.04583	FALSE	0.000871001	2.14824	TRUE
Chr_8	637200	637644	-	445	XUT0905	3.98444e-05	2.03695	TRUE	1.09228e-05	2.27191	TRUE	FALSE	FALSE	0.0229843	1.66036	TRUE	7.51024e-06	2.93384	TRUE
Chr_8	641414	642008	+	595	XUT0906	0.00372556	1.99629	TRUE	0.00408717	1.96169	TRUE	FALSE	FALSE	0.00328217	1.65792	TRUE	0.0303261	1.28055	TRUE
Chr_8	642422	644034	+	1613	XUT0907	0.0049346	0.5619	FALSE	1.88058e-05	0.936253	FALSE	FALSE	FALSE	0.270128	0.343405	FALSE	9.4367e-06	0.977724	FALSE
Chr_8	644050	644476	-	427	XUT0908	0.00640076	0.965834	FALSE	1.09121e-05	1.67182	TRUE	TRUE	FALSE	0.157022	0.683799	FALSE	1.53646e-06	1.76078	TRUE
Chr_8	644589	645596	+	1008	XUT0909	0.168419	0.240863	FALSE	3.27334e-15	1.3113	TRUE	TRUE	FALSE	0.872258	0.0983778	FALSE	6.48109e-11	1.3673	TRUE
Chr_8	659167	660922	-	1756	XUT0910	0.115038	0.550143	FALSE	5.70959e-13	2.19319	TRUE	FALSE	FALSE	0.104216	0.488897	FALSE	0.466366	0.226264	FALSE
Chr_8	659957	661226	+	1270	XUT0911	7.86127e-14	2.00063	TRUE	9.85625e-14	2.30451	TRUE	TRUE	FALSE	2.70098e-14	1.95651	TRUE	1.00379e-09	1.6302	TRUE
Chr_8	662767	663944	-	1178	XUT0912	1.6669e-52	2.46489	TRUE	6.32023e-48	2.7699	TRUE	FALSE	FALSE	3.1864e-44	2.23564	TRUE	2.98581e-41	2.17176	TRUE
Chr_8	664058	664874	-	817	XUT0913	2.49628e-12	1.53266	TRUE	6.61049e-28	2.58969	TRUE	FALSE	FALSE	1.04051e-06	1.22965	TRUE	3.97068e-07	1.28417	TRUE
Chr_8	666342	666845	+	504	XUT0914	1.43884e-05	1.21836	TRUE	0.000281832	1.17522	TRUE	FALSE	FALSE	0.000663402	1.08247	TRUE	2.46173e-05	1.31216	TRUE
Chr_8	694568	694780	-	213	XUT0916	0.230821	0.771081	FALSE	0.457098	0.509092	FALSE	FALSE	FALSE	0.215353	1.31614	FALSE	0.995136	-0.0131236	FALSE
Chr_8	698029	699148	-	1120	XUT0917	0.165484	0.416542	FALSE	0.00304872	0.865275	FALSE	FALSE	FALSE	0.594562	0.242914	FALSE	0.0108604	0.646774	FALSE
Chr_9	61	414	-	354	XUT0918	0.478042	0.377246	FALSE	0.021227	1.68529	TRUE	FALSE	FALSE	0.662782	0.568414	FALSE	0.000917461	3.49473	TRUE
Chr_9	4830	5079	+	250	XUT0919	8.67961e-10	3.48814	TRUE	0.0386432	1.29493	TRUE	FALSE	FALSE	2.51417e-07	2.87996	TRUE	4.60508e-09	3.28869	TRUE
Chr_9	5104	5572	+	469	XUT0920	8.5314e-13	3.3383	TRUE	0.0496491	1.08748	TRUE	FALSE	FALSE	3.35803e-09	2.83413	TRUE	6.08865e-14	3.58081	TRUE
Chr_9	5605	6729	+	1125	XUT0921	1.55847e-20	4.51999	TRUE	0.000383367	1.95812	TRUE	FALSE	FALSE	2.57253e-22	2.70615	TRUE	1.05074e-12	2.07679	TRUE
Chr_9	14644	14996	+	353	XUT0922	0.420485	0.367543	FALSE	0.00510093	1.21132	TRUE	FALSE	FALSE	0.830238	-0.305154	FALSE	0.738587	-0.222581	FALSE
Chr_9	18205	18427	-	223	XUT0923	0.102205	1.01158	FALSE	0.0380757	1.24664	TRUE	FALSE	FALSE	0.962452	-0.200365	FALSE	1	-1.33388	FALSE
Chr_9	27838	28474	+	637	XUT0924	0.0137074	0.793128	FALSE	1.9424e-06	1.65486	TRUE	TRUE	FALSE	0.00104342	1.01583	TRUE	0.00161669	1.00088	TRUE
Chr_9	42943	43240	+	298	XUT0925	0.0123148	1.49655	TRUE	2.94692e-08	3.33674	TRUE	FALSE	FALSE	0.418206	0.671485	FALSE	0.0186589	1.2909	TRUE
Chr_9	50835	51363	+	529	XUT0926	0.423419	0.430526	FALSE	8.50464e-05	1.72494	TRUE	FALSE	FALSE	0.940647	0.117636	FALSE	0.76114	-0.180894	FALSE
Chr_9	51318	51641	-	324	XUT0927	0.0385788	1.40647	TRUE	0.00175013	2.13489	TRUE	FALSE	FALSE	0.904506	-0.242338	FALSE	0.902097	0.134823	FALSE
Chr_9	69443	69710	-	268	XUT0928	0.806172	0.163169	FALSE	9.14286e-06	2.27169	TRUE	FALSE	FALSE	0.109872	1.33159	FALSE	0.0132526	1.80318	TRUE
Chr_9	104994	105236	+	243	XUT0930	0.499851	0.542324	FALSE	0.0453806	1.63563	TRUE	FALSE	FALSE	1	0	FALSE	1	1.24803	FALSE
Chr_9	125890	126463	-	574	XUT0931	0.00044942	2.18285	TRUE	2.91674e-09	3.97447	TRUE	FALSE	FALSE	0.000950764	1.81568	TRUE	0.000666881	1.88145	TRUE
Chr_9	185423	187041	-	1619	XUT0932	2.51483e-48	2.39602	TRUE	8.05102e-52	2.82677	TRUE	FALSE	FALSE	6.63764e-29	2.39974	TRUE	2.51003e-29	2.42998	TRUE
Chr_9	188323	189311	-	989	XUT0933	1.07764e-10	1.59893	TRUE	1.64788e-14	2.15927	TRUE	FALSE	FALSE	7.00494e-12	1.28092	TRUE	5.56747e-06	0.901011	FALSE
Chr_9	207646	207956	-	311	XUT0934	0.00966964	1.40577	TRUE	0.00382934	1.5962	TRUE	FALSE	FALSE	0.446043	0.652853	FALSE	0.0707535	1.04144	FALSE
Chr_9	207989	208254	-	266	XUT0935	0.00696616	1.63769	TRUE	0.00110639	2.05443	TRUE	FALSE	FALSE	0.21283	1.91391	FALSE	0.413035	1.09741	FALSE
Chr_9	209824	210223	-	400	XUT0936	0.000708874	1.98609	TRUE	0.000593639	2.08104	TRUE	FALSE	FALSE	0.0589246	1.09186	FALSE	0.495767	0.427046	FALSE
Chr_9	269940	272253	+	2314	XUT0938	1.09186e-28	1.51814	TRUE	1.10504e-37	2.09263	TRUE	TRUE	FALSE	2.38942e-15	1.12424	TRUE	3.66818e-10	0.909437	FALSE
Chr_9	286184	288697	-	2514	XUT0939	1.68049e-10	1.19121	TRUE	1.17081e-19	1.97064	TRUE	TRUE	FALSE	3.16311e-11	1.19184	TRUE	3.53623e-20	1.6308	TRUE
Chr_9	289432	290188	-	757	XUT0940	0.848088	0.105418	FALSE	0.033074	1.2412	TRUE	FALSE	FALSE	0.965412	0.0757198	FALSE	0.508265	-0.487065	FALSE
Chr_9	290229	290767	-	539	XUT0941	0.0207666	0.849781	FALSE	1.71654e-16	2.69425	TRUE	FALSE	FALSE	0.294702	0.603186	FALSE	0.00745475	1.13231	TRUE
Chr_9	343706	344191	+	486	XUT0942	4.20495e-06	2.41498	TRUE	0.000463534	1.93499	TRUE	FALSE	FALSE	1.68335e-05	2.41232	TRUE	0.00588679	1.64871	TRUE
Chr_9	344491	344691	+	201	XUT0943	0.670049	0.164825	FALSE	2.0447e-06	2.35633	TRUE	FALSE	FALSE	0.354875	0.741481	FALSE	0.00374518	1.57768	TRUE
Chr_9	375754	376556	-	803	XUT0944	3.76747e-31	2.53651	TRUE	2.21936e-19	2.29742	TRUE	FALSE	FALSE	5.17704e-47	2.51935	TRUE	2.30465e-43	2.44899	TRUE
Chr_9	379014	379602	+	589	XUT0945	1.34157e-06	2.23427	TRUE	1.11807e-09	2.90171	TRUE	FALSE	FALSE	1.27659e-05	2.07139	TRUE	2.24053e-05	2.03561	TRUE
Chr_9	383406	383979	+	574	XUT0946	0.581909	-0.506848	FALSE	0.0218804	1.77029	TRUE	FALSE	FALSE	0.0817295	2.15854	FALSE	0.0586678	2.151	FALSE
Chr_9	384173	384390	+	218	XUT0947	0.826151	0.267557	FALSE	0.0435851	1.67664	TRUE	FALSE	FALSE	0.997335	0.0155024	FALSE	1	-1.36697	FALSE
Chr_9	385293	385797	+	505	XUT0948	0.0408286	0.88201	FALSE	1.08837e-10	2.43739	TRUE	TRUE	FALSE	0.949469	0.0672518	FALSE	0.922891	0.0419694	FALSE
Chr_9	394908	395362	-	455	XUT0949	0.003392	1.55968	TRUE	4.23241e-05	2.32014	TRUE	TRUE	FALSE	2.71588e-05	2.55341	TRUE	1.32853e-06	2.93246	TRUE
Chr_9	404421	405076	-	656	XUT0950	0.00177325	1.98338	TRUE	2.67694e-07	3.18316	TRUE	FALSE	FALSE	0.0585191	1.34603	FALSE	0.011695	1.64929	TRUE
Chr_9	405185	405414	-	230	XUT0951	0.399975	0.719071	FALSE	8.36989e-05	2.70526	TRUE	FALSE	FALSE	0.959642	-0.174765	FALSE	0.620369	0.739695	FALSE
Chr_9	412829	413526	+	698	XUT0952	5.05002e-12	2.38849	TRUE	8.53276e-05	1.5818	TRUE	TRUE	FALSE	7.92425e-20	2.64392	TRUE	1.67246e-21	2.79048	TRUE
Chr_9	417332	418877	-	1546	XUT0954	6.85088e-16	1.83595	TRUE	1.28202e-30	2.85974	TRUE	FALSE	FALSE	6.30565e-09	1.77398	TRUE	3.06469e-14	2.2854	TRUE
Chr_9	445249	445681	-	433	XUT0955	7.87085e-05	2.23499	TRUE	3.65037e-11	3.73301	TRUE	FALSE	FALSE	0.105431	0.819201	FALSE	0.179974	0.639969	FALSE
Chr_9	484491	484886	-	396	XUT0956	0.00101199	2.22511	TRUE	3.51327e-05	2.87872	TRUE	FALSE	FALSE	5.53363e-05	2.48819	TRUE	2.70967e-05	2.63001	TRUE
Chr_9	485620	486728	+	1109	XUT0957	5.25422e-26	2.32877	TRUE	2.46163e-32	2.94809	TRUE	TRUE	FALSE	5.11444e-28	2.1115	TRUE	2.26088e-31	2.26323	TRUE
Chr_9	491237	493143	+	1907	XUT0958	0.810589	0.0592722	FALSE	1.16838e-07	0.929393	FALSE	FALSE	FALSE	0.0784501	-0.32	FALSE	0.017878	-0.379211	FALSE
Chr_9	493652	494365	-	714	XUT0959	0.876371	0.0907998	FALSE	0.376021	0.541394	FALSE	FALSE	FALSE	0.861632	-0.277801	FALSE	0.844223	-0.17418	FALSE
Chr_9	496034	496829	-	796	XUT0960	0.229478	0.531019	FALSE	8.08719e-06	1.7283	TRUE	FALSE	FALSE	0.333113	0.49193	FALSE	0.583446	0.235191	FALSE
Chr_9	519241	519604	-	364	XUT0961	0.822865	0.0512426	FALSE	0.00331726	1.84577	TRUE	FALSE	FALSE	0.924734	-0.203263	FALSE	0.241242	0.867748	FALSE
Chr_9	550057	550576	+	520	XUT0962	0.0396304	0.718675	FALSE	2.13397e-23	2.88878	TRUE	TRUE	FALSE	0.753354	0.254657	FALSE	0.0810765	0.640536	FALSE
Chr_9	560868	561836	+	969	XUT0963	0.898416	-0.0446797	FALSE	0.363097	0.225306	FALSE	TRUE	FALSE	0.717718	-0.125236	FALSE	0.00382556	-0.480063	FALSE
Chr_9	564298	565229	+	932	XUT0964	0.00957983	1.08821	TRUE	6.29948e-11	2.72116	TRUE	FALSE	FALSE	1.32543e-13	2.065	TRUE	5.07772e-08	1.61261	TRUE
Chr_9	567402	568378	-	977	XUT0965	1.14044e-27	1.78931	TRUE	8.56352e-24	1.95171	TRUE	TRUE	FALSE	2.76307e-26	1.7672	TRUE	2.23708e-25	1.75179	TRUE
Chr_9	570396	570771	+	376	XUT0966	8.18983e-05	2.55231	TRUE	4.68139e-12	4.67827	TRUE	TRUE	FALSE	2.04005e-05	1.99232	TRUE	0.0288063	1.15558	TRUE
Chr_9	584577	585467	+	891	XUT0967	3.66118e-58	2.81156	TRUE	2.72875e-30	2.393	TRUE	TRUE	FALSE	4.56032e-60	2.46506	TRUE	8.07169e-36	1.91598	TRUE
Chr_9	585363	586304	-	942	XUT0968	4.63068e-13	1.6686	TRUE	1.72037e-18	2.28331	TRUE	FALSE	FALSE	7.20627e-05	1.25521	TRUE	0.000161153	1.21051	TRUE
Chr_9	585740	586899	+	1160	XUT0969	7.97759e-10	1.95585	TRUE	8.93932e-17	2.84144	TRUE	TRUE	FALSE	0.00762062	1.19016	TRUE	3.93516e-07	2.05026	TRUE
Chr_9	586492	587039	-	548	XUT0970	0.0343649	0.933067	FALSE	0.00703978	1.26976	TRUE	FALSE	FALSE	0.189301	0.924682	FALSE	0.0109659	1.43545	TRUE
Chr_9	593671	594557	+	887	XUT0971	5.19062e-30	2.19487	TRUE	3.22608e-08	1.31611	TRUE	TRUE	FALSE	3.85365e-29	2.27788	TRUE	2.25361e-23	2.05309	TRUE
Chr_10	2755	4370	+	1616	XUT0972	5.70791e-47	4.69062	TRUE	6.4679e-24	3.60878	TRUE	TRUE	FALSE	1.04398e-13	3.7068	TRUE	5.2891e-10	3.14488	TRUE
Chr_10	7517	7844	+	328	XUT0973	0.272317	0.630345	FALSE	0.12225	0.846279	FALSE	FALSE	FALSE	0.990554	-0.0038697	FALSE	0.615039	0.345763	FALSE
Chr_10	8507	10186	+	1680	XUT0974	0.000107826	2.21022	TRUE	3.11278e-05	2.46523	TRUE	FALSE	FALSE	1.11312e-06	2.86323	TRUE	1.52576e-06	2.87125	TRUE
Chr_10	26560	27772	+	1213	XUT0975	0.000308728	1.0369	TRUE	1.79044e-07	1.60864	TRUE	FALSE	FALSE	0.0973997	0.650079	FALSE	0.00364527	0.965474	FALSE
Chr_10	43289	44359	-	1071	XUT0976	6.18969e-08	2.32665	TRUE	3.30891e-13	3.23131	TRUE	FALSE	FALSE	0.000251486	1.79733	TRUE	4.50086e-08	2.58212	TRUE
Chr_10	51430	52820	-	1391	XUT0977	6.41232e-12	0.911022	FALSE	1.18953e-10	1.0124	TRUE	FALSE	FALSE	2.88065e-05	0.884174	FALSE	2.66792e-07	1.06492	TRUE
Chr_10	54502	55026	+	525	XUT0979	0.00291012	1.65453	TRUE	1.34611e-12	3.65571	TRUE	FALSE	FALSE	0.0129297	1.81839	TRUE	0.0108631	1.81007	TRUE
Chr_10	70823	71119	-	297	XUT0981	0.123789	1.09294	FALSE	0.000468434	2.75935	TRUE	FALSE	FALSE	0.428011	2.10062	FALSE	0.371873	1.69768	FALSE
Chr_10	84303	84866	+	564	XUT0983	0.000849291	1.9749	TRUE	0.000573119	2.1056	TRUE	FALSE	FALSE	0.00875626	1.43411	TRUE	0.000220637	1.94092	TRUE
Chr_10	97108	99465	+	2358	XUT0984	0.000909644	0.847829	FALSE	1.05271e-12	2.04241	TRUE	FALSE	FALSE	8.33433e-08	0.966224	FALSE	2.9214e-13	1.29381	TRUE
Chr_10	150092	150639	+	548	XUT0985	0.00940844	1.88079	TRUE	5.4535e-05	2.91453	TRUE	FALSE	FALSE	0.829531	0.491146	FALSE	0.244365	1.15243	FALSE
Chr_10	154229	154540	-	312	XUT0986	0.109223	0.663546	FALSE	0.00143793	1.17958	TRUE	FALSE	FALSE	0.8778	0.228478	FALSE	0.128224	0.846419	FALSE
Chr_10	154614	155708	-	1095	XUT0987	1.10315e-13	1.19516	TRUE	2.25953e-25	1.94339	TRUE	TRUE	FALSE	1.34587e-06	0.870343	FALSE	3.60432e-10	1.10868	TRUE
Chr_10	183508	184614	-	1107	XUT0988	0.0645827	0.944866	FALSE	0.0196252	1.23511	TRUE	FALSE	FALSE	7.15494e-07	0.825224	FALSE	4.93627e-12	1.1252	TRUE
Chr_10	195156	195487	-	332	XUT0990	0.000912291	1.81361	TRUE	0.000487492	2.05398	TRUE	FALSE	FALSE	0.00510634	1.54324	TRUE	0.0163542	1.3378	TRUE
Chr_10	195355	195699	+	345	XUT0991	0.219667	1.11661	FALSE	0.00783867	2.0637	TRUE	FALSE	FALSE	0.00617633	2.41068	TRUE	0.046532	1.76186	TRUE
Chr_10	203283	206214	-	2932	XUT0992	3.40048e-28	2.48134	TRUE	1.01852e-42	3.42168	TRUE	FALSE	FALSE	4.89063e-20	2.31814	TRUE	5.20179e-22	2.45477	TRUE
Chr_10	206445	206664	+	220	XUT0993	0.00102257	2.15813	TRUE	1.36438e-08	3.87102	TRUE	FALSE	FALSE	0.00600542	1.47771	TRUE	0.00534862	1.46165	TRUE
Chr_10	209614	211146	-	1533	XUT0994	1.87729e-06	2.39354	TRUE	2.62309e-06	2.59965	TRUE	FALSE	FALSE	1.12335e-14	3.25616	TRUE	7.83933e-08	2.38891	TRUE
Chr_10	214528	214963	+	436	XUT0995	0.000126107	1.79877	TRUE	0.000527245	1.78333	TRUE	FALSE	FALSE	4.47566e-06	1.76322	TRUE	0.00413952	1.19823	TRUE
Chr_10	217614	217955	-	342	XUT0996	0.0248103	1.12629	TRUE	2.9343e-05	2.1473	TRUE	FALSE	FALSE	0.445391	0.948685	FALSE	0.00152929	2.61828	TRUE
Chr_10	228725	230014	+	1290	XUT0997	4.94679e-62	2.68519	TRUE	3.25439e-31	2.25118	TRUE	FALSE	FALSE	6.68648e-42	2.77188	TRUE	7.63316e-51	3.06855	TRUE
Chr_10	254742	255155	+	414	XUT0998	0.0142352	1.29214	TRUE	7.61252e-05	2.05463	TRUE	FALSE	FALSE	0.511351	0.488071	FALSE	0.329195	0.497016	FALSE
Chr_10	269902	270565	-	664	XUT0999	0.111871	0.766546	FALSE	4.33168e-07	2.42063	TRUE	FALSE	FALSE	0.464803	0.744027	FALSE	0.154106	1.00253	FALSE
Chr_10	287784	288642	-	859	XUT1000	8.36729e-05	1.47198	TRUE	6.67821e-07	1.94796	TRUE	FALSE	FALSE	3.16403e-05	1.86526	TRUE	8.97086e-06	1.97655	TRUE
Chr_10	290679	291292	+	614	XUT1001	0.0293689	1.00503	TRUE	4.90986e-18	3.70958	TRUE	FALSE	FALSE	0.246551	1.06552	FALSE	0.00834041	1.88459	TRUE
Chr_10	293704	294169	+	466	XUT1002	0.0100665	1.191	TRUE	4.09856e-10	2.68021	TRUE	FALSE	FALSE	0.294047	0.52019	FALSE	0.143372	0.5725	FALSE
Chr_10	300173	300830	-	658	XUT1003	2.24188e-06	1.54315	TRUE	1.16771e-12	2.37914	TRUE	FALSE	FALSE	1.51166e-06	2.1119	TRUE	0.00031007	1.66789	TRUE
Chr_10	309055	310488	+	1434	XUT1004	1.3007e-07	1.43797	TRUE	1.25695e-21	2.79545	TRUE	FALSE	FALSE	0.000230706	1.25971	TRUE	3.873e-05	1.39565	TRUE
Chr_10	312423	312735	-	313	XUT1005	0.48257	0.642023	FALSE	0.00264318	1.93345	TRUE	FALSE	FALSE	0.455463	-1.20565	FALSE	0.814797	-0.345761	FALSE
Chr_10	323528	323947	+	420	XUT1006	3.68647e-06	2.04186	TRUE	0.000216932	1.80851	TRUE	TRUE	FALSE	1.01937e-17	1.86564	TRUE	6.60607e-10	1.42101	TRUE
Chr_10	325770	326567	+	798	XUT1007	4.04606e-11	2.80775	TRUE	2.85687e-08	2.58448	TRUE	FALSE	FALSE	3.07344e-15	2.95212	TRUE	2.81011e-13	2.78649	TRUE
Chr_10	352410	352792	-	383	XUT1008	5.65103e-09	2.7705	TRUE	2.52902e-13	3.59866	TRUE	TRUE	FALSE	1.97817e-12	2.35506	TRUE	7.40097e-07	1.76876	TRUE
Chr_10	352820	353258	-	439	XUT1009	5.41779e-10	3.43259	TRUE	2.37708e-13	4.13332	TRUE	FALSE	FALSE	1.01014e-17	2.86653	TRUE	7.31357e-16	2.75632	TRUE
Chr_10	353499	353700	-	202	XUT1010	4.04984e-05	3.00036	TRUE	4.40819e-06	3.36383	TRUE	FALSE	FALSE	4.72086e-11	2.93755	TRUE	1.36453e-07	2.46224	TRUE
Chr_10	363765	364238	-	474	XUT1011	4.79477e-06	2.19559	TRUE	1.25764e-06	2.4651	TRUE	FALSE	FALSE	5.30666e-12	2.58278	TRUE	4.52963e-08	2.14767	TRUE
Chr_10	373086	374830	+	1745	XUT1012	4.63096e-47	2.26775	TRUE	1.44175e-30	2.15953	TRUE	TRUE	FALSE	3.80362e-35	1.98901	TRUE	2.70471e-25	1.6947	TRUE
Chr_10	373153	373615	-	463	XUT1013	0.000483436	2.0212	TRUE	1.18925e-07	3.17846	TRUE	FALSE	FALSE	8.46129e-06	2.28534	TRUE	8.39207e-05	2.08737	TRUE
Chr_10	389169	391070	-	1902	XUT1014	2.11957e-17	1.66199	TRUE	1.37091e-23	2.22066	TRUE	TRUE	FALSE	7.81371e-20	1.91982	TRUE	4.61966e-19	1.90248	TRUE
Chr_10	400485	400692	+	208	XUT1016	0.855836	0.325684	FALSE	0.0102534	2.06182	TRUE	FALSE	FALSE	0.979784	0.131083	FALSE	1	-0.635408	FALSE
Chr_10	454478	455231	-	754	XUT1017	1.39729e-08	2.97709	TRUE	5.4031e-09	3.16234	TRUE	FALSE	FALSE	1.54314e-26	3.17174	TRUE	9.40335e-24	3.04545	TRUE
Chr_10	463063	464471	+	1409	XUT1018	1.56602e-67	2.7044	TRUE	3.50295e-35	2.32618	TRUE	TRUE	FALSE	1.03534e-72	2.60345	TRUE	1.70036e-47	2.11266	TRUE
Chr_10	463968	465343	-	1376	XUT1019	3.28471e-20	3.10036	TRUE	6.22375e-27	3.84444	TRUE	FALSE	FALSE	4.54734e-26	2.25153	TRUE	3.02207e-17	1.86332	TRUE
Chr_10	465921	468445	-	2525	XUT1020	1.25885e-38	2.11668	TRUE	4.65797e-24	1.96906	TRUE	FALSE	FALSE	7.56982e-32	1.8065	TRUE	4.90626e-15	1.23756	TRUE
Chr_10	467320	468433	+	1114	XUT1021	1.58657e-26	2.31062	TRUE	5.69991e-13	1.85616	TRUE	FALSE	FALSE	8.49906e-33	2.19956	TRUE	9.32205e-27	2.00981	TRUE

## Sheet: Table S2 - mRNAs
Chr	Start	Stop	Strand	Length	ID	upf1 vs WT (adjusted P-value)	upf1 vs WT (FC, log2)	Upf1-sensitive	WT-CHX vs WT (adjusted P-value)	WT-CHX vs WT (FC, log2)	CHX-sensitive	upf2 vs WT (adjusted P-value)	upf2 vs WT (FC, log2)	Upf2-sensitive	upf3 vs WT (adjusted P-value)	upf3 vs WT (FC, log2)	Upf3-sensitive
chrmt	13837	14616	+	780	ATP6	0.240143	0.254161	FALSE	0.545477	0.131635	FALSE	0.645724	-0.155639	FALSE	6.31655e-06	-0.767671	FALSE
chrmt	13285	13431	+	147	ATP8	0.673674	0.170147	FALSE	0.0705512	-0.676071	FALSE	0.722255	0.391421	FALSE	0.424249	0.47377	FALSE
chrmt	15095	15328	+	234	ATP9	0.284579	0.222951	FALSE	0.00657964	0.530244	FALSE	0.820252	-0.0888896	FALSE	0.00254658	-0.479056	FALSE
chrmt	5489	6661	+	1173	COB	0.183474	0.306417	FALSE	0.00153459	0.709024	FALSE	0.901712	-0.0588079	FALSE	0.0186041	-0.392519	FALSE
chrmt	9644	12858	+	3215	COX1	0.93578	0.0523743	FALSE	0.0290191	0.900623	FALSE	0.645724	-0.138459	FALSE	0.00011335	-0.591764	FALSE
chrmt	15888	16637	+	750	COX2	0.926701	-0.0944625	FALSE	0.253017	0.739483	FALSE	0.15512	-0.275541	FALSE	1.13186e-06	-0.728522	FALSE
chrmt	507	1316	+	810	COX3	0.743418	-0.196602	FALSE	0.100379	0.75535	FALSE	0.00621446	-0.469678	FALSE	2.28476e-11	-1.03144	FALSE
Chr_1	351	1271	-	921	NCAS_0A00100	NA	NA	NA	NA	NA	NA	NA	NA	NA	NA	NA	NA
Chr_1	2003	2272	-	270	NCAS_0A00110	0.0360256	1.61536	TRUE	0.000948419	2.59756	TRUE	0.538686	0.98604	FALSE	0.222837	1.29647	FALSE
Chr_1	3020	3643	-	624	NCAS_0A00120	3.20171e-21	2.47642	TRUE	1.39633e-23	2.89392	TRUE	7.08623e-21	1.87203	TRUE	4.99315e-14	1.56257	TRUE
Chr_1	6067	6759	+	693	NCAS_0A00130	6.12106e-15	1.16649	TRUE	5.00309e-29	1.94038	TRUE	6.99654e-12	1.37041	TRUE	2.50959e-11	1.34352	TRUE
Chr_1	7200	10586	-	3387	NCAS_0A00140	3.43022e-12	1.28053	TRUE	1.20569e-14	1.69002	TRUE	1.32135e-08	0.906788	FALSE	2.46329e-12	1.10349	TRUE
Chr_1	12649	15027	+	2379	NCAS_0A00150	0.0366211	0.416226	FALSE	1.59273e-25	2.12982	TRUE	0.912327	0.0566272	FALSE	0.0110215	-0.457783	FALSE
Chr_1	15689	21661	+	5973	NCAS_0A00160	0.0490885	0.326957	FALSE	7.88831e-13	1.22996	TRUE	0.579323	0.154937	FALSE	0.149429	-0.241424	FALSE
Chr_1	21915	22901	+	987	NCAS_0A00170	0.122739	0.319224	FALSE	0.000682041	0.67861	FALSE	0.8778	0.0654932	FALSE	0.636957	-0.0887846	FALSE
Chr_1	23008	25014	-	2007	NCAS_0A00180	0.0987428	0.334304	FALSE	1.21644e-08	1.11387	TRUE	0.737261	0.121528	FALSE	0.0239082	-0.388942	FALSE
Chr_1	25790	26797	+	1008	NCAS_0A00190	0.548692	0.153584	FALSE	3.92811e-06	0.954289	FALSE	0.328134	-0.230906	FALSE	0.000464132	-0.578604	FALSE
Chr_1	27023	27412	-	390	NCAS_0A00200	0.00908721	0.363122	FALSE	9.71739e-14	1.11699	TRUE	0.854281	0.080471	FALSE	0.215171	-0.229819	FALSE
Chr_1	27640	28623	-	984	NCAS_0A00210	0.254641	0.179515	FALSE	3.37552e-12	1.02073	TRUE	0.914047	0.0701991	FALSE	0.0814358	0.406243	FALSE
Chr_1	29048	30217	+	1170	NCAS_0A00220	0.595572	0.0963542	FALSE	3.40173e-51	2.23442	TRUE	0.700301	-0.138048	FALSE	0.662821	-0.0929545	FALSE
Chr_1	32748	33881	-	1134	NCAS_0A00230	3.88616e-10	0.956712	FALSE	3.09904e-38	2.20696	TRUE	3.34139e-11	1.02554	TRUE	0.00548636	0.469613	FALSE
Chr_1	34644	35984	-	1341	NCAS_0A00240	0.0860675	0.37761	FALSE	4.42176e-06	0.995181	FALSE	0.636279	0.165361	FALSE	0.936891	-0.0186671	FALSE
Chr_1	36200	36439	-	240	NCAS_0A00250	0.939577	0.0593918	FALSE	8.89023e-05	0.915889	FALSE	0.929606	0.178389	FALSE	0.0192321	1.60513	TRUE
Chr_1	36850	37092	+	243	NCAS_0A00260	0.583834	0.211415	FALSE	0.00987927	0.844951	FALSE	0.940591	-0.0595099	FALSE	2.25188e-10	1.649	TRUE
Chr_1	37484	40117	+	2634	NCAS_0A00270	0.201163	0.239375	FALSE	9.72512e-24	1.78565	TRUE	0.865198	-0.083823	FALSE	0.110772	-0.322663	FALSE
Chr_1	40406	42013	+	1608	NCAS_0A00280	0.00581472	0.836391	FALSE	1.22123e-12	2.0669	TRUE	0.986294	0.0157681	FALSE	0.653523	-0.124994	FALSE
Chr_1	42329	43705	+	1377	NCAS_0A00290	0.178131	0.894373	FALSE	0.00432258	2.1048	TRUE	0.0766578	1.29994	FALSE	0.19802	0.928092	FALSE
Chr_1	43991	46324	+	2334	NCAS_0A00300	0.943441	-0.0177483	FALSE	1.97602e-26	1.63191	TRUE	0.991219	-0.0055439	FALSE	0.262879	-0.19265	FALSE
Chr_1	47425	47820	-	396	NCAS_0A00310	0.714883	0.0772433	FALSE	0.169391	0.216003	FALSE	0.989637	-0.00719502	FALSE	0.514737	-0.133955	FALSE
Chr_1	48114	49760	-	1647	NCAS_0A00320	0.92787	0.0229728	FALSE	9.85515e-06	0.647046	FALSE	0.828429	-0.0845245	FALSE	0.182146	-0.225857	FALSE
Chr_1	49975	51102	-	1128	NCAS_0A00330	0.665247	0.111144	FALSE	5.54319e-06	0.887303	FALSE	0.917866	0.17982	FALSE	0.0102198	1.52568	TRUE
Chr_1	51577	53136	+	1560	NCAS_0A00340	0.638407	0.111452	FALSE	6.7025e-08	1.05199	TRUE	0.219355	-0.293804	FALSE	0.700175	-0.0872299	FALSE
Chr_1	53306	54781	+	1476	NCAS_0A00350	0.553172	0.13216	FALSE	4.54261e-17	1.41826	TRUE	0.997335	-0.0023823	FALSE	0.0809297	-0.306169	FALSE
Chr_1	54875	55291	-	417	NCAS_0A00360	0.915216	-0.0226817	FALSE	0.00148997	0.626278	FALSE	0.7245	-0.174532	FALSE	0.633916	0.135138	FALSE
Chr_1	55533	55796	+	264	NCAS_0A00370	0.486532	0.149615	FALSE	4.27028e-08	1.08218	TRUE	0.839113	0.148603	FALSE	0.003253	0.824724	FALSE
Chr_1	55944	56375	-	432	NCAS_0A00380	0.900143	0.0655579	FALSE	2.1633e-06	0.986138	FALSE	0.954217	0.0401643	FALSE	0.808879	-0.0646165	FALSE
Chr_1	56612	57727	+	1116	NCAS_0A00390	3.69633e-05	1.8479	TRUE	1.06011e-06	2.47051	TRUE	0.0677868	0.953194	FALSE	3.11797e-07	2.21231	TRUE
Chr_1	59608	60720	+	1113	NCAS_0A00400	5.92421e-16	0.958344	FALSE	7.81332e-22	1.34606	TRUE	2.89706e-06	0.991051	FALSE	5.71358e-16	1.64882	TRUE
Chr_1	61082	62014	-	933	NCAS_0A00410	5.43186e-11	1.38924	TRUE	5.77188e-09	1.45394	TRUE	1.03281e-09	1.30094	TRUE	1.30003e-11	1.44982	TRUE
Chr_1	62649	64688	-	2040	NCAS_0A00420	0.152837	-0.234385	FALSE	3.86557e-40	2.14161	TRUE	0.737664	-0.144168	FALSE	0.78453	-0.0688893	FALSE
Chr_1	66142	68253	+	2112	NCAS_0A00430	0.798214	0.0654095	FALSE	2.18613e-19	1.40408	TRUE	0.142996	-0.287171	FALSE	5.33304e-06	-0.702876	FALSE
Chr_1	68706	69521	+	816	NCAS_0A00440	0.814209	-0.0399824	FALSE	4.45004e-17	1.21108	TRUE	0.999448	-0.00175106	FALSE	0.0303947	0.578727	FALSE
Chr_1	69818	70981	+	1164	NCAS_0A00450	0.973729	-0.00505927	FALSE	8.96016e-09	0.893009	FALSE	0.83538	-0.104287	FALSE	0.271467	0.244105	FALSE
Chr_1	71272	72822	-	1551	NCAS_0A00460	0.474205	0.221057	FALSE	4.78901e-10	1.42645	TRUE	0.537474	-0.176781	FALSE	0.0144	-0.425145	FALSE
Chr_1	73303	73974	+	672	NCAS_0A00470	0.473127	0.107201	FALSE	2.74656e-12	0.902479	FALSE	0.967422	-0.0268541	FALSE	0.76061	0.0812846	FALSE
Chr_1	74099	76303	-	2205	NCAS_0A00480	2.7667e-07	0.87779	FALSE	1.36612e-20	1.81701	TRUE	2.13449e-05	0.579864	FALSE	0.0978661	0.247434	FALSE
Chr_1	76652	78514	-	1863	NCAS_0A00490	0.85441	-0.0469785	FALSE	1.94116e-15	1.58139	TRUE	0.994012	0.00649679	FALSE	0.485545	-0.163288	FALSE
Chr_1	78733	79491	+	759	NCAS_0A00500	0.649799	-0.120208	FALSE	8.00444e-08	1.22901	TRUE	0.891443	0.0805481	FALSE	0.0511619	0.419161	FALSE
Chr_1	79776	81743	+	1968	NCAS_0A00510	0.863945	-0.10986	FALSE	1.36142e-05	1.6765	TRUE	0.381958	-0.574923	FALSE	0.021191	-1.1582	FALSE
Chr_1	81963	84902	+	2940	NCAS_0A00520	0.468313	-0.131744	FALSE	0.000105053	0.617605	FALSE	0.687644	-0.157336	FALSE	0.971398	-0.0100191	FALSE
Chr_1	87374	88489	-	1116	NCAS_0A00530	2.41273e-34	1.913	TRUE	5.18959e-21	1.77142	TRUE	6.37121e-20	1.86319	TRUE	1.39859e-33	2.44409	TRUE
Chr_1	90373	91803	+	1431	NCAS_0A00540	0.000286977	1.26479	TRUE	1.24728e-10	2.39233	TRUE	0.0131733	1.01761	TRUE	6.96074e-05	1.51183	TRUE
Chr_1	92249	94066	+	1818	NCAS_0A00550	1.19749e-07	0.84029	FALSE	3.20059e-27	1.94868	TRUE	0.00372105	0.546631	FALSE	0.0456537	0.382559	FALSE
Chr_1	94157	95209	-	1053	NCAS_0A00560	1.61874e-08	0.728583	FALSE	4.16775e-14	1.14078	TRUE	0.0824974	0.358626	FALSE	0.0672166	0.341009	FALSE
Chr_1	96044	99742	+	3699	NCAS_0A00570	0.826237	0.0623339	FALSE	1.5852e-10	1.14745	TRUE	0.988661	0.00840305	FALSE	0.283555	-0.206259	FALSE
Chr_1	99945	102014	-	2070	NCAS_0A00580	0.407834	0.197053	FALSE	1.30876e-14	1.47503	TRUE	0.81808	0.098487	FALSE	0.335111	-0.186738	FALSE
Chr_1	102748	108588	-	5841	NCAS_0A00590	0.613758	0.102502	FALSE	1.67236e-11	1.09801	TRUE	0.749528	-0.111517	FALSE	0.257633	-0.196762	FALSE
Chr_1	109246	110880	-	1635	NCAS_0A00600	0.46859	0.608351	FALSE	3.39267e-10	4.06847	TRUE	0.719305	0.642502	FALSE	0.941752	-0.0711362	FALSE
Chr_1	111522	113345	+	1824	NCAS_0A00610	0.365297	-0.144567	FALSE	7.84151e-33	1.74581	TRUE	0.967648	0.0534123	FALSE	0.0212499	0.993727	FALSE
Chr_1	113691	116951	+	3261	NCAS_0A00620	0.60761	0.106682	FALSE	1.64022e-09	1.02669	TRUE	0.631192	-0.141098	FALSE	0.0265756	-0.353415	FALSE
Chr_1	117233	118211	-	979	NCAS_0A00630	0.511532	0.184559	FALSE	1.50681e-05	0.947973	FALSE	0.986835	-0.00863588	FALSE	0.217415	-0.228536	FALSE
Chr_1	118775	119827	-	1053	NCAS_0A00640	0.431322	0.135872	FALSE	4.7127e-10	0.930834	FALSE	0.724767	-0.136263	FALSE	0.677477	0.092899	FALSE
Chr_1	120134	121114	-	981	NCAS_0A00650	0.308849	0.155309	FALSE	1.93778e-22	1.3486	TRUE	0.947379	-0.0383359	FALSE	0.36526	0.193832	FALSE
Chr_1	122223	128894	+	6672	NCAS_0A00660	0.155441	0.249716	FALSE	1.84459e-11	1.1347	TRUE	0.851748	0.0758928	FALSE	0.353315	-0.164468	FALSE
Chr_1	129150	129641	-	492	NCAS_0A00670	1.08728e-05	0.802021	FALSE	4.66997e-07	1.04535	TRUE	0.00226478	0.551367	FALSE	0.867338	0.0401064	FALSE
Chr_1	130298	130519	-	222	NCAS_0A00680	0.832811	-0.0507303	FALSE	0.00109254	0.580776	FALSE	0.853322	-0.114431	FALSE	0.967825	0.0140983	FALSE
Chr_1	130734	133028	-	2295	NCAS_0A00690	0.21309	0.220995	FALSE	1.12937e-20	1.54445	TRUE	1	-0.000344266	FALSE	0.0109719	-0.403128	FALSE
Chr_1	134083	137787	-	3705	NCAS_0A00700	0.595572	0.105007	FALSE	1.17974e-18	1.41685	TRUE	0.819702	-0.0863017	FALSE	0.00117084	-0.49812	FALSE
Chr_1	138727	141186	+	2460	NCAS_0A00710	0.51052	0.160143	FALSE	3.3897e-05	0.835398	FALSE	0.920811	0.0507377	FALSE	0.371294	-0.171991	FALSE
Chr_1	141507	141992	-	486	NCAS_0A00720	0.0882104	0.227303	FALSE	5.0421e-10	0.835687	FALSE	0.730015	0.269268	FALSE	0.0991826	0.62963	FALSE
Chr_1	142217	143374	-	1158	NCAS_0A00730	2.49217e-12	1.1798	TRUE	2.44304e-24	1.99479	TRUE	1.09695e-10	1.11382	TRUE	1.33377e-11	1.16907	TRUE
Chr_1	143564	144946	+	1383	NCAS_0A00740	0.438367	0.146956	FALSE	7.44235e-23	1.56045	TRUE	0.874081	-0.0643442	FALSE	0.0273384	-0.346093	FALSE
Chr_1	145092	145922	-	831	NCAS_0A00750	0.696082	0.0943339	FALSE	5.71305e-05	0.714075	FALSE	0.912002	0.0631822	FALSE	0.369933	-0.19505	FALSE
Chr_1	146161	147900	-	1740	NCAS_0A00760	0.961649	0.022867	FALSE	5.29154e-17	1.80895	TRUE	0.91344	0.0542977	FALSE	0.43243	0.152194	FALSE
Chr_1	148296	152210	+	3915	NCAS_0A00770	0.446889	0.176798	FALSE	3.45609e-11	1.29027	TRUE	0.797359	0.0983532	FALSE	0.0788692	-0.296955	FALSE
Chr_1	152317	153966	-	1650	NCAS_0A00780	1.33884e-22	1.44855	TRUE	3.71322e-18	1.5425	TRUE	2.13336e-19	1.26435	TRUE	1.18541e-10	0.92618	FALSE
Chr_1	154175	155410	-	1236	NCAS_0A00790	0.985147	0.0119399	FALSE	4.90893e-05	1.20505	TRUE	0.928681	0.0442458	FALSE	0.604546	-0.103034	FALSE
Chr_1	155651	158008	+	2358	NCAS_0A00800	0.951386	0.0163722	FALSE	2.15024e-09	0.925893	FALSE	0.864218	-0.074852	FALSE	0.442967	-0.147657	FALSE
Chr_1	158104	159096	+	993	NCAS_0A00810	0.0812959	0.302795	FALSE	3.01458e-12	1.16652	TRUE	0.903655	0.065467	FALSE	0.984112	0.00677638	FALSE
Chr_1	159145	159696	-	552	NCAS_0A00820	2.0358e-06	1.13131	TRUE	1.86511e-10	1.70324	TRUE	7.82685e-05	0.693376	FALSE	0.271842	0.223172	FALSE
Chr_1	159922	160248	-	327	NCAS_0A00830	0.578063	0.123723	FALSE	0.00237778	0.552549	FALSE	0.969417	0.0187381	FALSE	0.459007	-0.131161	FALSE
Chr_1	160625	163525	+	2901	NCAS_0A00840	0.979811	0.00676664	FALSE	1.33302e-13	1.14401	TRUE	0.84961	-0.091764	FALSE	0.490359	-0.151255	FALSE
Chr_1	165458	170164	+	4707	NCAS_0A00850	0.018464	0.34117	FALSE	6.48025e-28	1.62149	TRUE	0.455955	0.181545	FALSE	0.61716	-0.0924534	FALSE
Chr_1	170244	171782	-	1539	NCAS_0A00860	0.877125	-0.0338547	FALSE	0.104654	0.236267	FALSE	0.896996	-0.0715449	FALSE	0.931561	0.0222091	FALSE
Chr_1	172023	173558	-	1536	NCAS_0A00870	0.704389	0.146872	FALSE	4.3126e-06	1.40627	TRUE	0.682972	0.680943	FALSE	6.99911e-05	3.19544	TRUE
Chr_1	173726	176227	+	2502	NCAS_0A00880	0.125628	0.218655	FALSE	1.0225e-19	1.26754	TRUE	0.997335	0.00447382	FALSE	0.207829	0.30023	FALSE
Chr_1	176411	177628	+	1218	NCAS_0A00890	9.66298e-09	1.25698	TRUE	5.35307e-08	1.3671	TRUE	0.000785933	0.813993	FALSE	0.0282333	0.551519	FALSE
Chr_1	178813	181767	+	2955	NCAS_0A00900	0.457446	0.15008	FALSE	1.85872e-26	1.84025	TRUE	0.968689	-0.0206769	FALSE	0.00585039	-0.467628	FALSE
Chr_1	181820	183145	-	1326	NCAS_0A00910	0.0104014	0.40107	FALSE	1.2919e-19	1.46334	TRUE	0.368507	0.326584	FALSE	0.00512928	0.692289	FALSE
Chr_1	183496	184005	-	510	NCAS_0A00920	0.0400409	0.843992	FALSE	5.5994e-05	1.74713	TRUE	0.0022983	2.06917	TRUE	2.11094e-11	4.19169	TRUE
Chr_1	184501	186531	+	2031	NCAS_0A00930	0.000637799	0.556666	FALSE	1.46101e-29	2.01821	TRUE	0.0401233	0.459962	FALSE	0.0509876	0.410124	FALSE
Chr_1	186895	189333	+	2439	NCAS_0A00940	0.579569	0.112444	FALSE	4.44512e-27	1.76426	TRUE	0.687807	-0.119529	FALSE	0.0944077	-0.259072	FALSE
Chr_1	189789	190442	+	654	NCAS_0A00950	0.910671	0.0229707	FALSE	1.30898e-07	0.680543	FALSE	0.973232	0.0244312	FALSE	0.0230441	0.571495	FALSE
Chr_1	190738	192093	+	1356	NCAS_0A00960	0.431234	-0.156758	FALSE	3.60219e-17	1.66103	TRUE	0.360145	-0.245351	FALSE	0.000617564	-0.633072	FALSE
Chr_1	192609	193058	+	450	NCAS_0A00970	0.240521	0.176577	FALSE	0.000218883	0.524348	FALSE	0.997335	-0.00272997	FALSE	0.979582	-0.00612425	FALSE
Chr_1	193255	196776	-	3522	NCAS_0A00980	0.605533	-0.135442	FALSE	1.05403e-05	0.984561	FALSE	0.931209	0.0424098	FALSE	0.314633	-0.181586	FALSE
Chr_1	197267	200848	+	3582	NCAS_0A00990	0.58214	0.147057	FALSE	2.56769e-11	1.32987	TRUE	0.355625	0.223292	FALSE	0.35654	-0.171794	FALSE
Chr_1	201279	202280	+	1002	NCAS_0A01000	0.0484052	0.31461	FALSE	2.22561e-26	1.68453	TRUE	0.965412	-0.0217108	FALSE	0.012812	-0.432555	FALSE
Chr_1	202372	204000	-	1629	NCAS_0A01010	0.266074	0.178171	FALSE	3.2792e-15	1.15815	TRUE	0.762092	0.122347	FALSE	0.375766	0.178634	FALSE
Chr_1	204329	205030	+	702	NCAS_0A01020	0.0610588	0.389204	FALSE	8.24074e-22	1.90244	TRUE	0.215861	0.262433	FALSE	0.524685	-0.122547	FALSE
Chr_1	205147	206778	-	1632	NCAS_0A01030	0.349449	0.205915	FALSE	2.5301e-09	1.17782	TRUE	0.522549	0.177697	FALSE	0.922583	0.0210971	FALSE
Chr_1	207223	207768	+	546	NCAS_0A01040	0.718535	0.100293	FALSE	1.96443e-06	0.971518	FALSE	0.615262	-0.14954	FALSE	0.0238665	-0.371966	FALSE
Chr_1	207858	209774	-	1917	NCAS_0A01050	0.85732	-0.0391515	FALSE	1.75035e-22	1.49555	TRUE	0.459184	-0.190111	FALSE	4.28152e-06	-0.715161	FALSE
Chr_1	209966	211741	-	1776	NCAS_0A01060	0.0424783	0.344048	FALSE	8.48098e-14	1.28905	TRUE	0.439022	0.176202	FALSE	0.0829394	-0.266569	FALSE
Chr_1	212444	214849	+	2406	NCAS_0A01070	0.208101	0.229527	FALSE	6.90267e-19	1.51885	TRUE	0.282305	0.233108	FALSE	0.877218	0.0323156	FALSE
Chr_1	215147	216118	-	972	NCAS_0A01080	0.455828	0.138651	FALSE	2.13792e-26	1.67509	TRUE	0.403033	-0.194876	FALSE	0.00124859	-0.500007	FALSE
Chr_1	216576	218042	+	1467	NCAS_0A01090	1.54908e-23	1.60672	TRUE	5.16559e-23	1.90331	TRUE	6.36543e-21	1.51065	TRUE	3.01609e-17	1.37258	TRUE
Chr_1	218400	219464	+	1065	NCAS_0A01100	0.201812	0.241106	FALSE	9.6312e-12	1.24569	TRUE	0.204107	-0.26801	FALSE	0.000495026	-0.567016	FALSE
Chr_1	219722	221323	-	1602	NCAS_0A01110	0.354277	0.19722	FALSE	4.09295e-46	2.57569	TRUE	0.907522	-0.0578451	FALSE	0.000328077	-0.617217	FALSE
Chr_1	221483	222985	-	1503	NCAS_0A01120	8.67241e-30	1.74571	TRUE	3.84414e-31	2.11761	TRUE	3.12697e-27	1.63087	TRUE	5.57512e-23	1.50468	TRUE
Chr_1	223125	223796	-	672	NCAS_0A01130	2.52821e-30	2.03547	TRUE	5.72623e-29	2.32129	TRUE	1.04326e-12	1.76108	TRUE	9.16823e-30	2.7437	TRUE
Chr_1	224034	225044	-	1011	NCAS_0A01140	0.000632265	1.81832	TRUE	1.60623e-06	2.58982	TRUE	0.000620825	1.96497	TRUE	0.000245954	2.09754	TRUE
Chr_1	225369	226199	-	831	NCAS_0A01150	0.00932552	0.459275	FALSE	2.24339e-20	1.66858	TRUE	0.34743	0.238794	FALSE	0.803711	0.0577316	FALSE
Chr_1	226660	229038	+	2379	NCAS_0A01160	0.0469225	0.305333	FALSE	3.2871e-23	1.55035	TRUE	0.795322	0.0946832	FALSE	0.0970156	-0.270263	FALSE
Chr_1	229869	230591	+	723	NCAS_0A01170	3.20894e-05	0.737114	FALSE	7.31276e-30	2.17605	TRUE	0.000299386	0.792951	FALSE	0.0409196	0.473726	FALSE
Chr_1	231067	233334	+	2268	NCAS_0A01180	0.841635	0.0481801	FALSE	4.1318e-20	1.43125	TRUE	0.912304	-0.051868	FALSE	0.0160132	-0.398673	FALSE
Chr_1	233509	236082	-	2574	NCAS_0A01190	8.6458e-07	0.63516	FALSE	2.78803e-21	1.40893	TRUE	0.00351591	0.49024	FALSE	0.448312	0.142788	FALSE
Chr_1	236349	237635	+	1287	NCAS_0A01200	0.667363	0.103164	FALSE	1.15277e-15	1.40851	TRUE	0.899182	-0.0641461	FALSE	0.00240755	-0.536758	FALSE
Chr_1	237714	238484	-	771	NCAS_0A01210	0.000312434	0.439094	FALSE	3.35251e-14	1.02666	TRUE	0.163187	0.288663	FALSE	0.670559	0.0872153	FALSE
Chr_1	238768	240819	+	2052	NCAS_0A01220	0.539174	0.102448	FALSE	0.0752707	0.253704	FALSE	0.945356	-0.0357099	FALSE	0.386292	-0.168329	FALSE
Chr_1	241116	241787	+	672	NCAS_0A01230	0.304135	0.233963	FALSE	3.56604e-09	1.1976	TRUE	0.92775	-0.0518931	FALSE	0.0112297	-0.509878	FALSE
Chr_1	241821	243776	-	1956	NCAS_0A01240	0.00961871	0.33443	FALSE	6.74036e-33	1.66612	TRUE	0.59123	0.153831	FALSE	0.493153	0.126106	FALSE
Chr_1	244005	244493	-	489	NCAS_0A01250	0.793114	0.0716407	FALSE	0.272461	0.210835	FALSE	0.674036	-0.14199	FALSE	0.147947	-0.26333	FALSE
Chr_1	244630	245366	-	737	NCAS_0A01260	1.2747e-05	0.500651	FALSE	5.42663e-13	0.944193	FALSE	0.270595	0.750019	FALSE	0.00212151	1.53728	TRUE
Chr_1	245601	247667	+	2067	NCAS_0A01270	0.725843	0.0772131	FALSE	3.79273e-06	0.769484	FALSE	0.781551	-0.112543	FALSE	0.161678	-0.262513	FALSE
Chr_1	247840	248619	-	780	NCAS_0A01280	0.538441	0.107674	FALSE	0.00359296	0.440556	FALSE	0.988432	0.0190337	FALSE	0.155576	0.590315	FALSE
Chr_1	248867	249601	-	735	NCAS_0A01290	0.00258051	0.472802	FALSE	9.20153e-05	0.683492	FALSE	0.286207	0.351394	FALSE	4.4554e-10	1.39945	TRUE
Chr_1	249852	251180	-	1329	NCAS_0A01300	0.218261	0.206214	FALSE	1.39258e-23	1.58993	TRUE	0.473783	0.194523	FALSE	0.0320552	0.373025	FALSE
Chr_1	251524	255795	+	4272	NCAS_0A01310	0.759008	0.0643474	FALSE	3.24848e-15	1.19841	TRUE	0.931287	-0.046757	FALSE	0.794805	0.060263	FALSE
Chr_1	257101	259305	+	2205	NCAS_0A01320	0.875578	0.0454576	FALSE	3.35671e-10	1.13665	TRUE	0.924734	0.0568647	FALSE	0.67156	0.104167	FALSE
Chr_1	259414	264504	-	5091	NCAS_0A01330	0.420513	0.150815	FALSE	1.82019e-22	1.59782	TRUE	0.979784	0.0121808	FALSE	0.0214117	-0.360583	FALSE
Chr_1	265235	266509	+	1275	NCAS_0A01340	0.187639	0.51859	FALSE	0.0144081	0.929006	FALSE	0.0169168	0.633859	FALSE	0.143586	0.401714	FALSE
Chr_1	266560	267558	-	999	NCAS_0A01350	0.855837	0.101041	FALSE	2.1785e-08	1.39818	TRUE	0.735621	0.187302	FALSE	0.114341	0.423942	FALSE
Chr_1	267744	268751	-	1008	NCAS_0A01360	0.00137903	0.462926	FALSE	2.32741e-12	1.12538	TRUE	0.573962	0.508643	FALSE	0.000412753	1.77071	TRUE
Chr_1	269082	270344	+	1263	NCAS_0A01370	3.26524e-07	0.948393	FALSE	1.12477e-10	1.36254	TRUE	0.00129057	0.958268	FALSE	9.00493e-14	2.02586	TRUE
Chr_1	270478	271905	+	1428	NCAS_0A01380	0.000139027	0.571357	FALSE	4.36195e-23	1.62634	TRUE	0.0700444	0.3998	FALSE	0.057408	0.380999	FALSE
Chr_1	272086	273831	+	1746	NCAS_0A01390	0.0500407	0.286678	FALSE	2.67008e-14	1.14702	TRUE	0.694599	0.146646	FALSE	0.800202	0.0589878	FALSE
Chr_1	274080	276368	+	2289	NCAS_0A01400	0.990542	0.00977531	FALSE	1.08255e-08	1.3671	TRUE	0.906038	-0.0588678	FALSE	0.289364	-0.200958	FALSE
Chr_1	276586	277170	+	585	NCAS_0A01410	0.263117	0.211801	FALSE	2.63599e-18	1.45726	TRUE	0.772547	-0.102595	FALSE	0.171582	-0.232834	FALSE
Chr_1	277793	279799	-	2007	NCAS_0A01420	0.921486	0.0416043	FALSE	4.12002e-12	1.56979	TRUE	0.865193	-0.0692207	FALSE	0.0682206	-0.299068	FALSE
Chr_1	280192	282507	-	2316	NCAS_0A01430	0.487011	0.268363	FALSE	0.133918	0.506833	FALSE	0.0224097	-0.480819	FALSE	0.048062	-0.399373	FALSE
Chr_1	283827	284726	-	900	NCAS_0A01440	0.899346	-0.0284194	FALSE	1.77809e-07	0.986734	FALSE	0.42812	-0.185926	FALSE	3.35104e-06	-0.681619	FALSE
Chr_1	285450	286511	+	1062	NCAS_0A01450	0.0132972	0.491486	FALSE	1.84092e-07	1.08207	TRUE	0.235054	0.305185	FALSE	0.30467	0.223067	FALSE
Chr_1	286715	287305	+	591	NCAS_0A01460	0.900143	0.0766478	FALSE	0.0191917	0.889827	FALSE	0.960607	-0.0247614	FALSE	0.150084	-0.243693	FALSE
Chr_1	287493	288008	-	516	NCAS_0A01470	1.6933e-25	1.7145	TRUE	3.75284e-29	2.16467	TRUE	3.3389e-22	1.49058	TRUE	1.16019e-12	1.12459	TRUE
Chr_1	288201	288851	-	651	NCAS_0A01480	0.936473	0.0247951	FALSE	0.00183106	0.532639	FALSE	0.822501	-0.108023	FALSE	0.186869	-0.279198	FALSE
Chr_1	289084	291984	-	2901	NCAS_0A01490	1.54119e-06	0.771878	FALSE	3.63995e-22	1.75524	TRUE	6.12299e-05	0.672867	FALSE	0.000480265	0.593274	FALSE
Chr_1	292230	293654	+	1425	NCAS_0A01500	0.751052	0.0623506	FALSE	4.12421e-06	0.672563	FALSE	0.805183	-0.0870651	FALSE	0.0198612	-0.352505	FALSE
Chr_1	293788	295683	-	1896	NCAS_0A01510	0.000291256	0.572904	FALSE	5.22515e-23	1.72846	TRUE	0.00173766	0.478018	FALSE	0.574077	0.101643	FALSE
Chr_1	296107	298764	+	2658	NCAS_0A01520	0.0180548	-0.60871	FALSE	5.57843e-08	1.49278	TRUE	0.253344	-0.312883	FALSE	0.00130458	-0.679036	FALSE
Chr_1	298786	300153	-	1368	NCAS_0A01530	0.00594359	0.452832	FALSE	1.32637e-29	1.94157	TRUE	0.0672978	0.347018	FALSE	0.803918	-0.0517033	FALSE
Chr_1	300577	302751	+	2175	NCAS_0A01540	0.216818	0.195435	FALSE	3.43983e-43	1.99664	TRUE	0.650143	-0.145183	FALSE	0.0127812	-0.420712	FALSE
Chr_1	302857	305103	-	2247	NCAS_0A01550	0.647972	-0.169968	FALSE	0.000192359	1.15231	TRUE	0.940591	-0.0348621	FALSE	0.0516501	-0.314908	FALSE
Chr_1	308035	308262	+	228	NCAS_0A01560	0.0170254	0.401501	FALSE	3.52381e-06	0.828826	FALSE	0.318199	0.295881	FALSE	0.802589	0.0674378	FALSE
Chr_1	309025	311478	-	2454	NCAS_0A01570	0.566604	0.105084	FALSE	7.53203e-10	0.914175	FALSE	0.905728	0.0553047	FALSE	0.567328	-0.108265	FALSE
Chr_1	311615	312508	-	894	NCAS_0A01580	1.0058e-08	0.775174	FALSE	3.55019e-19	1.4079	TRUE	0.00706769	0.773067	FALSE	1.04581e-10	1.65911	TRUE
Chr_1	312644	313030	+	387	NCAS_0A01590	0.606418	-0.101836	FALSE	0.00103868	0.584593	FALSE	0.801469	0.320066	FALSE	0.10824	0.903335	FALSE
Chr_1	313121	313738	+	618	NCAS_0A01600	0.0040933	0.502568	FALSE	8.76976e-12	1.24378	TRUE	0.00579003	0.577365	FALSE	0.0369756	0.436853	FALSE
Chr_1	313896	314894	-	999	NCAS_0A01610	0.933495	-0.0145108	FALSE	1.22617e-37	2.10084	TRUE	0.996812	0.00671657	FALSE	0.150084	0.361873	FALSE
Chr_1	315075	316937	+	1863	NCAS_0A01620	0.982108	-0.00317244	FALSE	4.12389e-05	0.709178	FALSE	0.718311	-0.120524	FALSE	0.0411485	-0.334307	FALSE
Chr_1	317259	320390	-	3132	NCAS_0A01630	0.164274	0.216866	FALSE	2.63563e-22	1.44606	TRUE	0.820828	0.0936877	FALSE	0.237705	-0.216403	FALSE
Chr_1	320645	321406	-	762	NCAS_0A01640	0.458899	0.124313	FALSE	4.65692e-06	0.662404	FALSE	0.912304	-0.0609821	FALSE	0.647093	0.105804	FALSE
Chr_1	321595	322164	+	570	NCAS_0A01650	0.00379163	0.665084	FALSE	5.1404e-19	2.13266	TRUE	0.999826	-0.00406244	FALSE	0.643352	-0.145391	FALSE
Chr_1	322397	324763	-	2367	NCAS_0A01660	4.39215e-05	0.496666	FALSE	1.71451e-47	1.9832	TRUE	0.0752683	0.37151	FALSE	0.015378	0.446232	FALSE
Chr_1	325280	328525	-	3246	NCAS_0A01670	0.282668	0.182096	FALSE	1.71451e-37	1.9684	TRUE	0.879514	0.0615488	FALSE	0.155262	-0.226814	FALSE
Chr_1	328782	330314	-	1533	NCAS_0A01680	0.0452375	0.35401	FALSE	1.61667e-13	1.32723	TRUE	0.390311	0.219973	FALSE	0.82936	-0.047034	FALSE
Chr_1	330511	331077	+	567	NCAS_0A01690	0.0136523	0.365778	FALSE	7.13559e-08	0.843365	FALSE	0.940591	0.0403756	FALSE	0.183987	-0.254451	FALSE
Chr_1	331204	332016	-	813	NCAS_0A01700	0.916183	0.0303229	FALSE	1.48827e-07	0.833196	FALSE	0.784246	-0.105883	FALSE	0.0672982	-0.317963	FALSE
Chr_1	332239	332946	+	708	NCAS_0A01710	0.112807	0.252429	FALSE	4.86855e-13	1.11845	TRUE	0.939462	-0.0365264	FALSE	0.0642055	-0.302219	FALSE
Chr_1	333163	335403	-	2241	NCAS_0A01720	0.963572	0.0120285	FALSE	4.33611e-08	0.812385	FALSE	0.73083	-0.116934	FALSE	0.0933805	-0.278483	FALSE
Chr_1	335930	338284	+	2355	NCAS_0A01730	0.751775	0.0954126	FALSE	1.69685e-22	1.92961	TRUE	0.924734	0.0460463	FALSE	0.105552	-0.278253	FALSE
Chr_1	338531	339367	+	837	NCAS_0A01740	1.13922e-30	2.05662	TRUE	6.18771e-30	2.37141	TRUE	7.72938e-27	1.77725	TRUE	4.19628e-17	1.42382	TRUE
Chr_1	340967	343384	+	2418	NCAS_0A01760	0.0656115	0.337198	FALSE	5.51525e-11	1.20623	TRUE	0.671754	0.135973	FALSE	0.404612	-0.15194	FALSE
Chr_1	344217	345641	+	1425	NCAS_0A01770	0.00263791	0.423868	FALSE	1.58975e-74	2.70544	TRUE	0.126549	0.300955	FALSE	0.00879836	0.431692	FALSE
Chr_1	346347	346835	-	489	NCAS_0A01780	0.225698	0.159098	FALSE	9.09315e-12	0.851931	FALSE	0.995141	0.00462648	FALSE	0.986077	0.00432679	FALSE
Chr_1	347668	348135	+	468	NCAS_0A01790	0.612144	-0.098465	FALSE	0.0127158	0.403866	FALSE	0.733868	-0.141902	FALSE	0.976996	0.00809279	FALSE
Chr_1	349127	349393	+	267	NCAS_0A01800	0.0303891	-1.24596	FALSE	1.49994e-93	7.38314	TRUE	0.408808	-0.765361	FALSE	0.0989843	-1.16158	FALSE
Chr_1	349646	350251	-	606	NCAS_0A01810	1.90705e-13	3.74728	TRUE	2.1795e-09	3.2177	TRUE	7.97744e-30	3.28207	TRUE	5.41897e-22	2.85732	TRUE
Chr_1	351123	352490	+	1368	NCAS_0A01820	0.905251	-0.0209139	FALSE	7.04001e-27	1.64803	TRUE	0.882225	0.0932303	FALSE	0.123357	0.370051	FALSE
Chr_1	353062	353619	+	558	NCAS_0A01830	0.0882104	-0.249191	FALSE	4.74726e-08	0.788938	FALSE	0.171743	-0.362654	FALSE	0.409692	-0.19931	FALSE
Chr_1	353929	355866	-	1938	NCAS_0A01840	2.39058e-07	0.998841	FALSE	3.93293e-24	2.1895	TRUE	0.000190502	0.740338	FALSE	6.0845e-07	0.96199	FALSE
Chr_1	356138	358243	-	2106	NCAS_0A01850	0.984178	-0.00688233	FALSE	7.76408e-06	1.39082	TRUE	0.971666	0.0160547	FALSE	0.115604	-0.249015	FALSE
Chr_1	358469	361087	-	2619	NCAS_0A01860	0.333796	0.180681	FALSE	1.91378e-25	1.67626	TRUE	0.740739	-0.111352	FALSE	0.000450452	-0.538947	FALSE
Chr_1	361681	362322	+	642	NCAS_0A01870	0.421448	-0.138784	FALSE	3.47616e-06	0.688791	FALSE	0.940591	-0.108209	FALSE	0.183977	0.680823	FALSE
Chr_1	362592	363983	+	1392	NCAS_0A01880	1.13304e-05	0.564396	FALSE	9.51185e-24	1.46842	TRUE	0.0852703	0.330094	FALSE	0.45233	0.142653	FALSE
Chr_1	364746	365561	-	816	NCAS_0A01890	0.463514	0.157088	FALSE	4.0604e-05	0.73503	FALSE	0.758114	-0.110754	FALSE	0.0338026	-0.353377	FALSE
Chr_1	367001	368023	+	1023	NCAS_0A01900	0.3593	0.136213	FALSE	1.70263e-12	0.944204	FALSE	0.894474	0.0927528	FALSE	0.0326314	0.538244	FALSE
Chr_1	368283	369059	+	777	NCAS_0A01910	0.566604	0.166874	FALSE	7.25315e-13	1.58156	TRUE	0.874777	-0.0869375	FALSE	0.850098	-0.0513308	FALSE
Chr_1	369668	371086	+	1419	NCAS_0A01920	1.06082e-70	2.45573	TRUE	5.76544e-35	2.07365	TRUE	5.40348e-41	2.30612	TRUE	3.65876e-39	2.26087	TRUE
Chr_1	371261	371626	-	366	NCAS_0A01930	0.609251	0.103814	FALSE	0.000809371	0.544297	FALSE	1	-0.000195023	FALSE	0.152399	-0.269831	FALSE
Chr_1	371837	372733	+	897	NCAS_0A01940	0.68378	0.0880363	FALSE	3.21073e-11	1.14106	TRUE	0.757153	-0.125781	FALSE	0.00176565	-0.5746	FALSE
Chr_1	373371	374768	+	1398	NCAS_0A01950	0.163457	0.279481	FALSE	1.97313e-23	1.82699	TRUE	0.916901	-0.0659413	FALSE	0.582137	-0.142468	FALSE
Chr_1	376597	377886	+	1290	NCAS_0A01960	9.73737e-14	1.36286	TRUE	9.15935e-28	2.28929	TRUE	3.99896e-09	0.929498	FALSE	0.0022377	0.519256	FALSE
Chr_1	378853	379692	+	840	NCAS_0A01980	0.495367	0.138789	FALSE	7.55064e-39	2.07741	TRUE	0.294047	-0.262349	FALSE	0.0074179	-0.4936	FALSE
Chr_1	381080	382165	+	1086	NCAS_0A01990	0.439249	0.164913	FALSE	2.17919e-18	1.56278	TRUE	0.896996	0.0618636	FALSE	0.49613	-0.130318	FALSE
Chr_1	382529	383170	+	642	NCAS_0A02000	0.00843653	0.579027	FALSE	1.32713e-17	1.89062	TRUE	0.552933	0.219556	FALSE	0.985807	-0.00209411	FALSE
Chr_1	383789	384247	-	459	NCAS_0A02010	0.773128	0.105085	FALSE	3.74787e-17	1.68722	TRUE	0.766806	-0.127133	FALSE	0.00409282	-0.558906	FALSE
Chr_1	384651	385592	+	942	NCAS_0A02020	0.825798	-0.041501	FALSE	6.51217e-07	0.671357	FALSE	0.725536	-0.143476	FALSE	0.240084	0.245533	FALSE
Chr_1	385685	386800	+	1116	NCAS_0A02030	5.09654e-05	0.634267	FALSE	4.72866e-19	1.50947	TRUE	0.0871404	0.414164	FALSE	0.210221	0.284794	FALSE
Chr_1	387566	393079	+	5514	NCAS_0A02040	0.738511	-0.0782185	FALSE	7.29053e-12	1.24145	TRUE	0.571024	-0.153984	FALSE	0.072278	-0.288995	FALSE
Chr_1	393397	394152	-	756	NCAS_0A02050	0.572124	0.132894	FALSE	2.78431e-31	2.05032	TRUE	0.851295	-0.0806875	FALSE	0.00157554	-0.532216	FALSE
Chr_1	395043	395863	+	821	NCAS_0A02060	0.78938	-0.0516909	FALSE	9.19708e-06	0.632751	FALSE	0.89178	-0.0808969	FALSE	0.503782	0.164415	FALSE
Chr_1	396735	397670	+	936	NCAS_0A02070	0.281714	0.593022	FALSE	1.35263e-06	2.4026	TRUE	0.799315	0.245152	FALSE	0.724739	0.185199	FALSE
Chr_1	397735	398100	-	366	NCAS_0A02080	0.158003	0.506721	FALSE	8.05936e-10	1.87754	TRUE	0.999463	0.009397	FALSE	0.42779	0.320543	FALSE
Chr_1	398497	399207	-	711	NCAS_0A02090	0.000408298	0.931349	FALSE	3.43102e-08	1.63991	TRUE	0.18695	1.1693	FALSE	1.93998e-07	3.45098	TRUE
Chr_1	399470	399730	-	261	NCAS_0A02100	0.855836	0.039419	FALSE	0.0780626	0.262575	FALSE	0.969493	0.0578722	FALSE	0.0825068	0.901857	FALSE
Chr_1	399968	400708	+	741	NCAS_0A02110	0.488451	0.138276	FALSE	1.18266e-07	0.883258	FALSE	0.829687	-0.0972507	FALSE	0.299732	-0.212764	FALSE
Chr_1	401097	402230	+	1134	NCAS_0A02120	3.7266e-10	1.1483	TRUE	1.99157e-08	1.21029	TRUE	8.70063e-10	0.953892	FALSE	0.00100277	0.544692	FALSE
Chr_1	402715	404301	+	1587	NCAS_0A02130	0.673674	0.123013	FALSE	8.26523e-19	1.81444	TRUE	0.920811	-0.0503892	FALSE	0.0625466	-0.34061	FALSE
Chr_1	404457	405284	+	828	NCAS_0A02140	0.0430765	0.552698	FALSE	0.0025339	0.819512	FALSE	0.687584	0.200496	FALSE	0.583049	-0.15965	FALSE
Chr_1	405366	406385	-	1020	NCAS_0A02150	5.03374e-36	2.24213	TRUE	4.67131e-30	2.39486	TRUE	3.96829e-45	2.37839	TRUE	9.65359e-35	2.09788	TRUE
Chr_1	406753	407991	-	1239	NCAS_0A02160	4.50341e-05	0.730822	FALSE	1.03531e-21	1.93829	TRUE	0.000598101	0.605364	FALSE	0.0101818	0.459786	FALSE
Chr_1	409216	409851	+	636	NCAS_0A02170	1.85192e-05	1.10327	TRUE	1.35006e-12	2.09367	TRUE	0.0434985	1.2286	TRUE	1.23121e-09	3.11474	TRUE
Chr_1	410419	411489	+	1071	NCAS_0A02180	0.210895	0.403618	FALSE	1.89585e-25	2.89949	TRUE	0.222053	0.486725	FALSE	0.201921	0.443296	FALSE
Chr_1	411630	412430	-	801	NCAS_0A02190	1.38307e-10	1.08364	TRUE	3.55869e-19	1.72207	TRUE	0.0323345	0.485121	FALSE	0.0602373	0.408558	FALSE
Chr_1	412677	415361	+	2685	NCAS_0A02200	0.881466	-0.0349101	FALSE	9.78754e-17	1.58986	TRUE	0.765831	-0.103668	FALSE	0.00114271	-0.498979	FALSE
Chr_1	415480	416211	-	732	NCAS_0A02210	3.14697e-07	0.785759	FALSE	5.289e-31	2.01791	TRUE	0.00782471	0.42003	FALSE	0.640872	0.0871847	FALSE
Chr_1	416590	417606	+	1017	NCAS_0A02220	0.00075651	0.601625	FALSE	8.17251e-22	1.84491	TRUE	0.0740897	0.344605	FALSE	0.814797	0.0516959	FALSE
Chr_1	418098	419582	+	1485	NCAS_0A02230	0.0293827	0.796056	FALSE	1.12583e-10	2.1735	TRUE	0.460777	0.384925	FALSE	0.892676	-0.0616598	FALSE
Chr_1	421551	422477	+	927	NCAS_0A02240	0.690597	0.0869373	FALSE	7.69921e-20	1.56317	TRUE	0.54673	-0.15539	FALSE	0.383486	-0.147404	FALSE
Chr_1	422615	426667	-	4053	NCAS_0A02250	0.72839	-0.386727	FALSE	0.0814313	1.50563	FALSE	0.430846	-0.224475	FALSE	0.0300898	0.41029	FALSE
Chr_1	427160	427423	+	264	NCAS_0A02260	0.480262	-0.145135	FALSE	3.15515e-06	0.829639	FALSE	0.766893	-0.146589	FALSE	0.853674	0.0519177	FALSE
Chr_1	427586	428530	-	945	NCAS_0A02270	0.000173653	0.624964	FALSE	1.60501e-18	1.56497	TRUE	0.00996897	0.437988	FALSE	0.473368	0.135496	FALSE
Chr_1	428753	429061	-	309	NCAS_0A02280	0.519731	0.121097	FALSE	7.80721e-07	0.76657	FALSE	0.950162	-0.0416	FALSE	0.770727	0.0804532	FALSE
Chr_1	429274	431079	-	1806	NCAS_0A02290	1.0384e-26	1.62378	TRUE	6.50148e-60	2.9723	TRUE	1.27113e-24	1.37311	TRUE	8.11176e-23	1.32468	TRUE
Chr_1	432746	433514	+	769	NCAS_0A02300	0.93472	-0.01709	FALSE	0.91084	-0.0155386	FALSE	0.503006	-0.166624	FALSE	0.0033431	-0.442172	FALSE
Chr_1	433632	436271	-	2640	NCAS_0A02310	0.68322	0.121743	FALSE	1.22522e-08	1.24076	TRUE	0.842907	-0.0994106	FALSE	0.107849	-0.349654	FALSE
Chr_1	436617	438254	-	1638	NCAS_0A02320	0.809338	-0.059027	FALSE	2.34533e-18	1.45468	TRUE	0.906595	-0.0577762	FALSE	0.571562	-0.117127	FALSE
Chr_1	438697	442671	+	3975	NCAS_0A02330	0.840242	0.0488089	FALSE	3.19565e-25	1.65146	TRUE	0.632919	-0.140643	FALSE	0.00169204	-0.488066	FALSE
Chr_1	443079	444134	+	1056	NCAS_0A02340	0.929643	-0.0199105	FALSE	8.80297e-08	0.811385	FALSE	0.24847	-0.241596	FALSE	0.41542	-0.145101	FALSE
Chr_1	444398	447121	-	2724	NCAS_0A02350	0.475273	0.139	FALSE	2.25756e-21	1.53273	TRUE	0.711017	-0.127016	FALSE	0.00447213	-0.469886	FALSE
Chr_1	448263	449699	+	1437	NCAS_0A02360	4.09413e-06	1.21485	TRUE	6.00124e-11	1.94215	TRUE	0.599145	-0.339661	FALSE	0.763233	-0.136436	FALSE
Chr_1	450516	451346	+	831	NCAS_0A02370	0.0574344	0.291253	FALSE	3.97987e-38	2.02191	TRUE	0.930243	0.0497144	FALSE	0.0161563	0.451962	FALSE
Chr_1	451487	452305	-	819	NCAS_0A02380	0.950667	0.0267491	FALSE	0.0344454	0.470901	FALSE	0.416653	-0.183529	FALSE	9.75287e-05	-0.564756	FALSE
Chr_1	453019	453915	+	897	NCAS_0A02390	0.73941	-0.0665715	FALSE	4.58318e-05	0.636598	FALSE	0.148048	-0.26877	FALSE	6.22935e-07	-0.718609	FALSE
Chr_1	454155	454628	+	474	NCAS_0A02400	0.524403	0.178151	FALSE	1.04402e-08	1.13245	TRUE	0.642486	0.15662	FALSE	0.326192	-0.193497	FALSE
Chr_1	455080	456522	+	1443	NCAS_0A02410	0.352087	0.322467	FALSE	1.88251e-11	2.12919	TRUE	0.86616	-0.0652554	FALSE	0.46325	0.126689	FALSE
Chr_1	457189	458127	-	939	NCAS_0A02420	0.00413192	0.543691	FALSE	3.46377e-21	1.94432	TRUE	0.135511	0.293259	FALSE	0.769695	-0.0595216	FALSE
Chr_1	459091	460176	+	1086	NCAS_0A02430	0.886387	0.0324802	FALSE	0.875104	-0.0244584	FALSE	0.952361	0.0446922	FALSE	0.214014	0.310879	FALSE
Chr_1	460788	463250	-	2463	NCAS_0A02440	0.314706	0.196253	FALSE	3.32438e-15	1.35892	TRUE	0.784605	-0.107709	FALSE	0.0484837	-0.348092	FALSE
Chr_1	463760	469546	-	5787	NCAS_0A02450	0.159406	-0.267021	FALSE	1.69438e-07	0.982569	FALSE	0.491704	-0.170737	FALSE	8.94664e-05	-0.581305	FALSE
Chr_1	470073	470747	+	675	NCAS_0A02460	3.10345e-36	1.93538	TRUE	6.72699e-23	1.81985	TRUE	1.70572e-28	1.86294	TRUE	2.21765e-20	1.58001	TRUE
Chr_1	472106	472276	+	171	NCAS_0A02470	0.935611	0.018691	FALSE	1.81061e-11	0.949361	FALSE	0.959411	0.0644354	FALSE	0.257656	0.487496	FALSE
Chr_1	472592	474475	+	1884	NCAS_0A02480	0.530293	0.162092	FALSE	4.68905e-21	1.98752	TRUE	0.99225	0.00539327	FALSE	0.00292683	-0.444852	FALSE
Chr_1	474534	475078	-	545	NCAS_0A02490	0.928449	0.0346889	FALSE	3.57335e-06	0.848216	FALSE	0.898524	-0.0708241	FALSE	0.116159	-0.329643	FALSE
Chr_1	475286	476302	+	1017	NCAS_0A02500	0.78514	-0.059735	FALSE	1.18668e-06	1.03608	TRUE	0.894779	-0.0632258	FALSE	0.0105773	-0.444331	FALSE
Chr_1	476363	477643	-	1281	NCAS_0A02510	0.347671	0.149691	FALSE	2.68788e-29	1.61659	TRUE	0.988432	0.00903655	FALSE	0.8238	-0.0526034	FALSE
Chr_1	478202	479062	-	861	NCAS_0A02520	0.00843653	0.497966	FALSE	9.23214e-57	3.05901	TRUE	0.08282	0.43909	FALSE	0.268147	0.266388	FALSE
Chr_1	479510	480227	+	718	NCAS_0A02530	0.984999	-0.00515859	FALSE	0.00133061	0.541215	FALSE	0.953239	-0.0404347	FALSE	0.985609	-0.00593702	FALSE
Chr_1	481807	483426	-	1620	NCAS_0A02540	8.45086e-05	1.14697	TRUE	2.74656e-13	2.17051	TRUE	0.0174075	0.78589	FALSE	0.0577769	0.618661	FALSE
Chr_1	484341	486479	-	2139	NCAS_0A02550	0.0411439	0.392233	FALSE	2.45611e-19	1.73922	TRUE	0.275174	0.234566	FALSE	0.0585908	-0.311168	FALSE
Chr_1	487074	489899	+	2826	NCAS_0A02560	3.53634e-05	0.599981	FALSE	2.55249e-24	1.66136	TRUE	0.20596	0.265139	FALSE	0.183242	-0.23386	FALSE
Chr_1	490141	492021	-	1881	NCAS_0A02570	0.232474	0.24688	FALSE	1.13942e-07	1.0293	TRUE	0.548428	-0.178008	FALSE	0.0447624	-0.360827	FALSE
Chr_1	492614	493201	-	588	NCAS_0A02580	0.793582	-0.0481741	FALSE	6.81267e-06	0.809207	FALSE	0.19414	-0.289837	FALSE	0.0025763	-0.530861	FALSE
Chr_1	494320	494934	-	615	NCAS_0A02590	1.51301e-06	0.783677	FALSE	1.17822e-29	2.0208	TRUE	0.0451729	0.443853	FALSE	0.669972	0.107649	FALSE
Chr_1	495195	495377	-	183	NCAS_0A02600	0.801692	0.065517	FALSE	4.4556e-13	1.19708	TRUE	0.940591	0.040962	FALSE	0.686694	-0.0858676	FALSE
Chr_1	496591	499728	+	3138	NCAS_0A02610	2.71778e-06	0.64655	FALSE	4.40983e-32	1.84665	TRUE	0.00162349	0.511371	FALSE	0.457016	0.137933	FALSE
Chr_1	500093	501382	-	1290	NCAS_0A02620	0.755266	0.0868283	FALSE	8.84693e-10	1.25162	TRUE	0.820548	0.0923054	FALSE	0.754561	0.0649117	FALSE
Chr_1	501876	502778	-	903	NCAS_0A02630	8.01266e-09	0.933443	FALSE	1.01957e-36	2.2823	TRUE	5.68159e-06	0.731007	FALSE	0.00430376	0.484701	FALSE
Chr_1	503171	504550	-	1380	NCAS_0A02640	0.603245	0.136435	FALSE	8.53986e-07	1.06124	TRUE	0.962452	0.0284582	FALSE	0.720945	0.0833393	FALSE
Chr_1	505025	506806	-	1782	NCAS_0A02650	0.614483	0.121939	FALSE	1.64991e-50	2.64365	TRUE	0.831315	0.120526	FALSE	0.0345731	0.490019	FALSE
Chr_1	507445	507963	+	519	NCAS_0A02660	2.1959e-05	0.555881	FALSE	5.77184e-20	1.35397	TRUE	0.0209815	0.623656	FALSE	2.85871e-14	1.75647	TRUE
Chr_1	508474	510648	+	2175	NCAS_0A02670	0.00457585	0.448463	FALSE	5.16327e-23	1.71373	TRUE	0.734406	0.16955	FALSE	0.0160683	0.564041	FALSE
Chr_1	510902	513559	+	2658	NCAS_0A02680	0.000252169	1.07349	TRUE	1.60544e-12	2.09868	TRUE	0.000155145	0.956593	FALSE	0.00143069	0.83626	FALSE
Chr_1	513898	515199	-	1302	NCAS_0A02690	0.00291718	0.511807	FALSE	2.31794e-24	1.86216	TRUE	0.991359	-0.00642452	FALSE	0.00800587	-0.464097	FALSE
Chr_1	516733	517947	+	1215	NCAS_0A02700	1.46493e-25	1.53803	TRUE	8.83359e-50	2.6162	TRUE	1.2284e-15	1.23944	TRUE	3.20407e-14	1.1833	TRUE
Chr_1	519241	519871	-	631	NCAS_0A02710	0.000747193	0.515896	FALSE	6.04305e-12	1.14937	TRUE	0.578471	0.167326	FALSE	0.144908	-0.263752	FALSE
Chr_1	520113	521903	-	1791	NCAS_0A02720	2.04338e-05	0.666367	FALSE	5.67779e-12	1.23131	TRUE	0.0196206	0.456979	FALSE	0.0335487	0.398607	FALSE
Chr_1	522320	523381	+	1062	NCAS_0A02730	0.0372165	0.355269	FALSE	1.12508e-09	1.05869	TRUE	0.919985	0.0465733	FALSE	0.639845	-0.0877371	FALSE
Chr_1	523836	525233	+	1398	NCAS_0A02740	0.119792	0.287323	FALSE	1.82346e-21	1.66492	TRUE	0.960138	-0.0246797	FALSE	0.150084	-0.24789	FALSE
Chr_1	525382	527265	-	1884	NCAS_0A02750	0.581909	0.110254	FALSE	1.17728e-11	1.08382	TRUE	0.944944	0.0354712	FALSE	0.17452	-0.245281	FALSE
Chr_1	527535	528137	+	603	NCAS_0A02760	0.678485	0.0806888	FALSE	6.80064e-07	0.737262	FALSE	0.916901	-0.0509589	FALSE	0.178315	-0.245617	FALSE
Chr_1	528814	530643	+	1830	NCAS_0A02770	4.37352e-64	2.78907	TRUE	8.92116e-30	2.24795	TRUE	7.68561e-50	2.55368	TRUE	5.28109e-49	2.54464	TRUE
Chr_1	531072	532880	+	1809	NCAS_0A02780	8.64508e-69	2.19189	TRUE	4.64677e-42	2.07707	TRUE	5.06123e-37	1.90535	TRUE	1.19515e-34	1.84683	TRUE
Chr_1	532968	533489	-	522	NCAS_0A02790	0.251949	0.20382	FALSE	5.2801e-06	0.749673	FALSE	0.428409	-0.198084	FALSE	0.000370856	-0.570864	FALSE
Chr_1	533712	535517	+	1806	NCAS_0A02800	0.115383	0.328315	FALSE	9.98903e-16	1.54508	TRUE	0.158166	0.362914	FALSE	0.0850453	0.376035	FALSE
Chr_1	535902	537742	+	1841	NCAS_0A02810	2.744e-05	0.580844	FALSE	2.36547e-12	1.1141	TRUE	0.0170101	0.425185	FALSE	0.00102858	0.542079	FALSE
Chr_1	537882	539762	-	1881	NCAS_0A02820	0.0188922	0.480722	FALSE	4.07001e-20	1.95722	TRUE	0.0795406	0.34192	FALSE	0.784632	0.0591634	FALSE
Chr_1	540282	540650	-	369	NCAS_0A02830	2.46845e-05	0.645255	FALSE	2.05122e-18	1.53044	TRUE	3.69739e-07	0.76762	FALSE	2.66663e-12	1.03352	TRUE
Chr_1	541694	541903	-	210	NCAS_0A02840	0.509568	-0.317255	FALSE	0.479082	0.361875	FALSE	0.848048	-0.207205	FALSE	0.0944674	-0.83746	FALSE
Chr_1	542807	547669	+	4863	NCAS_0A02850	2.71064e-12	0.87647	FALSE	2.95326e-12	1.04095	TRUE	0.000732209	0.538799	FALSE	0.00998676	0.415494	FALSE
Chr_1	547858	548961	-	1104	NCAS_0A02860	2.78671e-07	1.03198	TRUE	1.73831e-10	1.47189	TRUE	4.34327e-08	0.95828	FALSE	1.85289e-07	0.920982	FALSE
Chr_1	549276	551888	+	2613	NCAS_0A02870	0.397143	0.175277	FALSE	5.69311e-12	1.19745	TRUE	0.913015	0.0525784	FALSE	0.280668	-0.196571	FALSE
Chr_1	553819	555585	-	1767	NCAS_0A02880	4.21012e-13	1.22008	TRUE	7.82705e-18	1.68794	TRUE	9.42406e-07	0.903894	FALSE	0.00565077	0.543087	FALSE
Chr_1	556208	558937	-	2730	NCAS_0A02890	2.86154e-07	0.652574	FALSE	5.14474e-08	0.808575	FALSE	0.0362986	0.380632	FALSE	0.552674	0.116167	FALSE
Chr_1	559689	560600	-	912	NCAS_0A02900	0.314744	0.185559	FALSE	1.14784e-45	2.3261	TRUE	0.224079	0.28224	FALSE	0.959532	0.0137226	FALSE
Chr_1	561120	563270	-	2151	NCAS_0A02910	0.482292	0.166204	FALSE	3.11692e-20	1.70752	TRUE	0.659188	-0.155638	FALSE	0.0144106	-0.450867	FALSE
Chr_1	563585	566026	+	2442	NCAS_0A02920	0.271243	0.196971	FALSE	1.37594e-17	1.40028	TRUE	0.874777	-0.069042	FALSE	0.001371	-0.522206	FALSE
Chr_1	566085	566765	-	681	NCAS_0A02930	3.44598e-08	1.09594	TRUE	1.19534e-17	1.88975	TRUE	1.24074e-09	1.07344	TRUE	0.0020091	0.59138	FALSE
Chr_1	567021	569594	+	2574	NCAS_0A02940	0.932399	0.0359946	FALSE	3.62863e-11	1.47941	TRUE	0.845743	0.0865328	FALSE	0.936611	-0.0180028	FALSE
Chr_1	569730	571571	-	1842	NCAS_0A02950	0.0421418	0.396159	FALSE	2.07719e-14	1.51338	TRUE	0.376284	0.195263	FALSE	0.01442	-0.372562	FALSE
Chr_1	572163	573608	-	1446	NCAS_0A02960	0.34279	0.155088	FALSE	5.85531e-51	2.1422	TRUE	0.14131	-0.30584	FALSE	0.0829394	-0.311042	FALSE
Chr_1	576222	585539	+	9318	NCAS_0A02970	0.940679	-0.0173232	FALSE	9.48166e-15	1.21717	TRUE	0.745138	-0.11385	FALSE	0.00589145	-0.442845	FALSE
Chr_1	585723	586529	+	807	NCAS_0A02980	0.955775	0.0365587	FALSE	4.00018e-07	1.11155	TRUE	0.979784	0.0235569	FALSE	0.424384	-0.215457	FALSE
Chr_1	586764	587270	+	507	NCAS_0A02990	6.14386e-38	2.23747	TRUE	4.14573e-32	2.40219	TRUE	1.2367e-27	1.76282	TRUE	7.03635e-16	1.34242	TRUE
Chr_1	587490	589529	-	2040	NCAS_0A03000	0.50305	0.139983	FALSE	3.64352e-33	1.9637	TRUE	0.798273	-0.0990307	FALSE	0.0617241	-0.321113	FALSE
Chr_1	589975	590745	+	771	NCAS_0A03010	0.97406	-0.00671291	FALSE	2.92461e-06	0.606986	FALSE	0.973942	0.02444	FALSE	0.154106	0.384762	FALSE
Chr_1	591098	593224	+	2127	NCAS_0A03020	2.94536e-16	1.11487	TRUE	3.62402e-24	1.65142	TRUE	6.38898e-08	0.833427	FALSE	0.00141606	0.517477	FALSE
Chr_1	593557	595281	-	1725	NCAS_0A03030	3.07063e-49	2.31158	TRUE	4.13672e-22	1.83568	TRUE	1.0379e-46	2.35634	TRUE	3.50993e-48	2.40497	TRUE
Chr_1	596807	597226	+	420	NCAS_0A03040	2.00617e-06	0.742524	FALSE	2.2001e-08	1.00274	TRUE	0.0691327	0.319466	FALSE	0.903163	-0.0236749	FALSE
Chr_1	597806	599071	-	1266	NCAS_0A03050	4.12439e-08	0.785772	FALSE	1.35831e-18	1.46041	TRUE	0.00723765	0.511232	FALSE	0.0108627	0.471608	FALSE
Chr_1	601736	603250	+	1515	NCAS_0A03060	1.25601e-44	2.5726	TRUE	3.56486e-29	2.4275	TRUE	2.5292e-47	2.40068	TRUE	6.52698e-46	2.38241	TRUE
Chr_1	603639	605609	+	1971	NCAS_0A03070	5.17957e-50	1.96095	TRUE	1.19688e-34	1.97251	TRUE	1.0441e-40	1.82528	TRUE	5.516e-28	1.51139	TRUE
Chr_1	605745	606140	+	396	NCAS_0A03080	1.61934e-24	1.87958	TRUE	1.36065e-20	2.05257	TRUE	3.80181e-25	1.66231	TRUE	5.06495e-14	1.23544	TRUE
Chr_1	606277	607308	-	1032	NCAS_0A03090	7.5612e-12	1.29922	TRUE	3.92177e-14	1.64835	TRUE	1.28055e-08	1.13868	TRUE	1.07495e-07	1.08558	TRUE
Chr_1	608311	609183	+	873	NCAS_0A03100	0.0099814	0.530301	FALSE	9.72809e-12	1.45154	TRUE	0.651273	0.18079	FALSE	0.162625	-0.313992	FALSE
Chr_1	609267	610301	-	1035	NCAS_0A03110	0.319386	-0.221454	FALSE	0.000104273	0.788878	FALSE	0.271769	-0.246909	FALSE	0.000387088	-0.580153	FALSE
Chr_1	611490	613124	+	1635	NCAS_0A03120	6.28041e-07	0.74898	FALSE	2.2639e-26	1.80771	TRUE	0.00339302	0.485506	FALSE	0.00190689	0.502172	FALSE
Chr_1	615345	616364	+	1020	NCAS_0A03140	0.976779	-0.00147521	FALSE	1.57356e-18	1.42294	TRUE	0.769212	-0.11735	FALSE	0.138393	-0.279712	FALSE
Chr_1	616600	618861	-	2262	NCAS_0A03150	0.466036	0.192655	FALSE	1.19858e-14	1.66907	TRUE	0.990067	0.00844406	FALSE	0.347641	-0.186591	FALSE
Chr_1	619303	620961	-	1659	NCAS_0A03160	0.000550043	0.604418	FALSE	1.12696e-09	1.17088	TRUE	0.543363	0.247422	FALSE	0.386912	0.231305	FALSE
Chr_1	621400	625359	-	3960	NCAS_0A03170	0.711959	0.075233	FALSE	2.28744e-38	1.96241	TRUE	0.473248	-0.179125	FALSE	0.00236493	-0.471883	FALSE
Chr_1	626215	626558	-	344	NCAS_0A03180	0.000423157	0.623191	FALSE	1.93699e-12	1.34539	TRUE	0.233666	0.269533	FALSE	0.439212	-0.151938	FALSE
Chr_1	626695	627891	+	1197	NCAS_0A03190	8.09957e-30	1.52152	TRUE	1.32744e-17	1.39325	TRUE	1.95947e-19	1.35555	TRUE	1.05688e-12	1.09014	TRUE
Chr_1	633779	634455	+	677	NCAS_0A03210	0.93316	-0.0230604	FALSE	0.0108316	0.444705	FALSE	0.677393	-0.143565	FALSE	0.317131	-0.1918	FALSE
Chr_1	635016	636851	-	1836	NCAS_0A03220	0.788747	-0.0714859	FALSE	7.80307e-45	2.81268	TRUE	0.0644349	-0.337481	FALSE	0.00066447	-0.538246	FALSE
Chr_1	639202	640410	+	1209	NCAS_0A03230	0.895191	-0.0422901	FALSE	3.38724e-08	1.22591	TRUE	0.940591	0.0438492	FALSE	0.351755	0.20151	FALSE
Chr_1	640670	642583	-	1914	NCAS_0A03240	0.999162	0.020826	FALSE	5.14052e-19	1.72502	TRUE	0.92752	-0.0428982	FALSE	0.0992813	-0.281615	FALSE
Chr_1	643280	646087	+	2808	NCAS_0A03250	0.551252	0.142638	FALSE	3.87123e-19	1.63376	TRUE	0.938094	0.0409603	FALSE	0.354637	-0.174257	FALSE
Chr_1	646403	647401	+	999	NCAS_0A03260	0.230645	0.212635	FALSE	4.3657e-17	1.35992	TRUE	0.797367	0.118016	FALSE	0.98471	-0.00540273	FALSE
Chr_1	647565	648608	+	1044	NCAS_0A03270	8.02072e-20	1.27863	TRUE	4.84214e-23	1.6412	TRUE	1.00035e-09	1.12033	TRUE	9.82261e-07	0.919535	FALSE
Chr_1	648687	652031	-	3345	NCAS_0A03280	1.66787e-21	1.46547	TRUE	3.08125e-19	1.6575	TRUE	1.36982e-21	1.41988	TRUE	3.22981e-14	1.14531	TRUE
Chr_1	652553	653089	+	537	NCAS_0A03290	6.10578e-30	2.08012	TRUE	3.13638e-26	2.3047	TRUE	8.24238e-34	1.85578	TRUE	3.7807e-22	1.50556	TRUE
Chr_1	653851	655329	+	1479	NCAS_0A03300	4.87412e-21	1.39868	TRUE	2.801e-13	1.30721	TRUE	2.61756e-16	1.19925	TRUE	1.11838e-05	0.678112	FALSE
Chr_1	655403	657895	-	2493	NCAS_0A03310	0.231883	0.239977	FALSE	2.22753e-15	1.46835	TRUE	0.906595	0.0553909	FALSE	0.0353656	-0.349738	FALSE
Chr_1	658684	659127	+	444	NCAS_0A03320	7.80396e-33	1.83311	TRUE	6.54994e-23	1.81094	TRUE	1.3259e-10	1.66995	TRUE	4.20648e-16	2.09069	TRUE
Chr_1	659465	662890	-	3426	NCAS_0A03330	0.69065	0.0877049	FALSE	6.99947e-24	1.70607	TRUE	0.771889	-0.104624	FALSE	0.000120522	-0.593606	FALSE
Chr_1	663531	667976	+	4446	NCAS_0A03340	4.47048e-17	1.08448	TRUE	5.68463e-29	1.72896	TRUE	1.53972e-09	0.871245	FALSE	0.000174825	0.565596	FALSE
Chr_1	668057	669007	-	951	NCAS_0A03350	0.453501	-0.767568	FALSE	0.109362	1.44744	FALSE	0.131346	-0.435626	FALSE	0.0612249	0.463475	FALSE
Chr_1	669167	669802	-	636	NCAS_0A03360	0.263826	0.186451	FALSE	5.13374e-11	1.04257	TRUE	0.83438	0.323142	FALSE	0.0269682	1.40119	TRUE
Chr_1	669972	671027	+	1056	NCAS_0A03370	0.000449267	0.535127	FALSE	1.40278e-25	1.74035	TRUE	0.243312	0.278261	FALSE	0.907373	-0.0259101	FALSE
Chr_1	671105	672931	-	1827	NCAS_0A03380	0.533163	-0.14475	FALSE	1.50271e-05	0.880006	FALSE	0.624623	-0.174791	FALSE	0.0959698	-0.334047	FALSE
Chr_1	673193	673855	-	663	NCAS_0A03390	0.113374	0.43097	FALSE	3.54131e-06	1.32225	TRUE	0.0106687	1.12356	TRUE	0.000361393	1.46905	TRUE
Chr_1	674254	675297	+	1044	NCAS_0A03400	4.46215e-06	0.849	FALSE	1.08441e-14	1.58603	TRUE	1.36584e-07	1.16539	TRUE	2.70287e-08	1.23565	TRUE
Chr_1	675573	675941	-	369	NCAS_0A03410	2.09507e-69	3.23529	TRUE	1.50489e-32	2.59729	TRUE	3.88926e-83	2.92322	TRUE	9.36539e-72	2.73826	TRUE
Chr_1	676473	677738	-	1266	NCAS_0A03420	0.88409	0.0688077	FALSE	2.42707e-22	2.01859	TRUE	0.971259	-0.0202392	FALSE	0.869738	-0.0466996	FALSE
Chr_1	678079	679185	-	1107	NCAS_0A03430	0.0988889	0.325135	FALSE	3.52089e-10	1.20878	TRUE	0.897036	-0.0698868	FALSE	0.575203	-0.134298	FALSE
Chr_1	679507	680256	-	750	NCAS_0A03440	0.540586	0.618394	FALSE	0.000111266	2.29762	TRUE	0.972663	-0.0495443	FALSE	0.759736	0.211666	FALSE
Chr_1	680524	681402	-	879	NCAS_0A03450	0.435213	0.188743	FALSE	6.27006e-14	1.49454	TRUE	0.565181	0.181112	FALSE	0.640269	0.102807	FALSE
Chr_1	681704	684139	+	2436	NCAS_0A03460	0.933889	0.0304247	FALSE	5.88648e-12	1.30471	TRUE	0.289193	-0.231204	FALSE	0.0252706	-0.367084	FALSE
Chr_1	684361	686811	+	2451	NCAS_0A03470	0.0388511	0.340268	FALSE	1.22655e-22	1.61763	TRUE	0.70535	0.138064	FALSE	0.779059	0.0632095	FALSE
Chr_1	687303	689645	+	2343	NCAS_0A03480	0.000363127	0.534521	FALSE	2.3652e-32	1.96006	TRUE	0.3318	0.27457	FALSE	0.0237901	0.459019	FALSE
Chr_1	689871	693578	-	3708	NCAS_0A03490	0.891287	-0.0342994	FALSE	1.118e-08	0.911099	FALSE	0.784246	-0.128702	FALSE	0.424384	0.18344	FALSE
Chr_1	694017	694574	-	558	NCAS_0A03500	0.325009	0.212621	FALSE	3.5724e-11	1.25369	TRUE	0.930495	0.0475805	FALSE	0.621716	-0.106005	FALSE
Chr_1	695034	696371	-	1338	NCAS_0A03510	1.76459e-07	1.62142	TRUE	8.49111e-14	2.44964	TRUE	9.22427e-07	1.3574	TRUE	0.000699109	0.987843	FALSE
Chr_1	696607	698013	-	1407	NCAS_0A03520	0.194763	0.223721	FALSE	4.54322e-13	1.18942	TRUE	0.620167	-0.138142	FALSE	0.319193	-0.165568	FALSE
Chr_1	698730	701312	-	2583	NCAS_0A03530	0.903908	0.0286565	FALSE	2.52336e-12	1.0188	TRUE	0.761049	-0.123144	FALSE	0.321079	-0.198676	FALSE
Chr_1	701962	702870	-	909	NCAS_0A03540	0.409013	0.147855	FALSE	1.11541e-155	4.24524	TRUE	0.844189	-0.101879	FALSE	0.261921	0.256009	FALSE
Chr_1	703589	706147	+	2559	NCAS_0A03550	0.0529572	0.340605	FALSE	9.47404e-15	1.36176	TRUE	0.584886	0.166607	FALSE	0.165617	-0.253165	FALSE
Chr_1	706580	708559	+	1980	NCAS_0A03560	0.240521	0.237399	FALSE	3.58394e-18	1.53618	TRUE	0.417149	-0.211111	FALSE	0.149164	-0.265763	FALSE
Chr_1	708718	711654	-	2937	NCAS_0A03570	5.90334e-05	0.585657	FALSE	1.93217e-23	1.62043	TRUE	0.0205046	0.386808	FALSE	0.790235	0.0531948	FALSE
Chr_1	712039	715380	-	3342	NCAS_0A03580	0.607049	0.103511	FALSE	1.45022e-18	1.43331	TRUE	0.797942	-0.0895351	FALSE	0.000181712	-0.544436	FALSE
Chr_1	715709	717310	-	1602	NCAS_0A03590	0.775635	0.0761642	FALSE	3.10619e-24	1.90821	TRUE	0.826147	0.126354	FALSE	0.0042011	0.652926	FALSE
Chr_1	717693	721403	+	3711	NCAS_0A03600	0.949572	-0.0283106	FALSE	0.000336278	1.02516	TRUE	0.935208	-0.0370163	FALSE	0.214538	-0.204262	FALSE
Chr_1	721729	722793	-	1065	NCAS_0A03610	0.439391	0.19915	FALSE	2.68195e-24	2.08245	TRUE	0.693591	-0.155979	FALSE	0.286786	-0.23184	FALSE
Chr_1	722990	723685	+	696	NCAS_0A03620	0.524409	0.113449	FALSE	1.38961e-06	0.720258	FALSE	0.920832	-0.0509814	FALSE	0.564024	-0.120224	FALSE
Chr_1	725481	727451	+	1971	NCAS_0A03630	0.035686	1.07406	TRUE	5.76097e-16	3.42245	TRUE	0.0117827	1.14267	TRUE	0.0558577	0.88505	FALSE
Chr_1	727694	729358	+	1665	NCAS_0A03640	4.90266e-06	0.905901	FALSE	2.01957e-24	2.2011	TRUE	0.114935	0.414065	FALSE	0.00562896	0.613016	FALSE
Chr_1	729502	731325	-	1824	NCAS_0A03650	0.00814509	0.367652	FALSE	1.21907e-19	1.34857	TRUE	0.271899	0.230804	FALSE	0.706939	-0.0716814	FALSE
Chr_1	731708	732781	+	1074	NCAS_0A03660	0.0545441	0.278155	FALSE	2.08056e-16	1.20565	TRUE	0.924734	-0.0445026	FALSE	0.333036	-0.174705	FALSE
Chr_1	732993	737768	-	4776	NCAS_0A03670	0.90103	0.0327425	FALSE	3.29272e-11	1.07258	TRUE	0.872258	-0.0708756	FALSE	0.263972	-0.203006	FALSE
Chr_1	738305	740032	-	1728	NCAS_0A03680	0.990828	-0.003087	FALSE	0.000191446	0.568883	FALSE	0.822131	-0.105441	FALSE	0.692434	0.0924452	FALSE
Chr_1	740739	745112	-	4374	NCAS_0A03690	0.942515	0.022379	FALSE	7.61856e-08	0.915349	FALSE	0.906502	-0.0562707	FALSE	0.0309575	-0.3638	FALSE
Chr_1	747294	748517	+	1224	NCAS_0A03700	3.06035e-20	1.15628	TRUE	6.61894e-27	1.60917	TRUE	3.37539e-10	1.0592	TRUE	3.49952e-11	1.11673	TRUE
Chr_1	749890	750603	+	714	NCAS_0A03710	0.657124	0.127442	FALSE	9.20629e-12	1.34356	TRUE	0.371643	-0.223685	FALSE	0.0294913	-0.391816	FALSE
Chr_1	750847	753186	+	2340	NCAS_0A03720	0.00129532	0.616086	FALSE	6.73182e-13	1.48156	TRUE	0.0253204	0.417542	FALSE	0.0755572	0.322028	FALSE
Chr_1	753440	754489	+	1050	NCAS_0A03730	0.753941	-0.0569871	FALSE	5.38649e-18	1.80167	TRUE	0.752681	-0.122805	FALSE	0.815433	-0.052795	FALSE
Chr_1	755330	755692	+	363	NCAS_0A03740	0.000897692	0.510016	FALSE	0.000420102	0.602347	FALSE	0.0287446	0.517757	FALSE	0.00931658	0.570806	FALSE
Chr_1	756284	758023	+	1740	NCAS_0A03750	8.35729e-09	0.792348	FALSE	3.92015e-22	1.54278	TRUE	0.000790163	0.688046	FALSE	6.59673e-07	0.970321	FALSE
Chr_1	761710	764244	-	2535	NCAS_0A03770	0.0548572	0.313792	FALSE	2.08469e-25	1.72622	TRUE	0.259316	0.235276	FALSE	0.278166	-0.185121	FALSE
Chr_1	764509	765528	+	1020	NCAS_0A03780	1.15769e-15	1.06062	TRUE	6.11778e-12	1.09232	TRUE	1.72967e-07	0.858678	FALSE	2.47257e-07	0.849967	FALSE
Chr_1	766240	768843	-	2604	NCAS_0A03790	0.448052	-0.625128	FALSE	0.999876	-0.00326873	FALSE	0.407434	1.10652	FALSE	0.272986	1.08419	FALSE
Chr_1	769365	775745	+	6381	NCAS_0A03800	0.91556	0.025715	FALSE	1.1849e-15	1.18263	TRUE	0.53683	-0.156162	FALSE	0.00183935	-0.460923	FALSE
Chr_1	775930	777155	-	1226	NCAS_0A03810	0.0274515	0.345473	FALSE	1.2482e-06	0.793733	FALSE	0.480589	0.22839	FALSE	0.0903979	0.355921	FALSE
Chr_1	777305	778174	+	870	NCAS_0A03820	0.185622	0.280161	FALSE	6.15473e-29	1.99388	TRUE	0.484329	0.251357	FALSE	0.270024	0.268277	FALSE
Chr_1	778327	779667	+	1341	NCAS_0A03830	0.0224277	0.347001	FALSE	2.77027e-11	1.05113	TRUE	0.403033	0.249504	FALSE	0.0949525	0.346805	FALSE
Chr_1	780031	782784	+	2754	NCAS_0A03840	0.405136	0.153799	FALSE	1.70541e-15	1.27651	TRUE	0.890403	-0.0624354	FALSE	0.1215	-0.267012	FALSE
Chr_1	783070	783999	-	930	NCAS_0A03850	0.620712	0.135059	FALSE	1.44955e-19	1.819	TRUE	0.949469	0.0377425	FALSE	0.927827	0.0216375	FALSE
Chr_1	784217	785479	+	1263	NCAS_0A03860	0.989576	0.0124981	FALSE	3.16862e-21	1.82617	TRUE	0.973942	0.0186237	FALSE	0.232462	-0.236024	FALSE
Chr_1	785716	786474	-	759	NCAS_0A03870	0.802697	-0.0530802	FALSE	3.70767e-08	0.938425	FALSE	0.907522	-0.0578967	FALSE	0.886172	0.0328393	FALSE
Chr_1	786729	788615	+	1887	NCAS_0A03880	3.40431e-10	1.00304	TRUE	2.80441e-31	2.14523	TRUE	4.48443e-07	0.746995	FALSE	0.0637057	0.303581	FALSE
Chr_1	788785	789057	-	273	NCAS_0A03890	0.646157	0.113687	FALSE	0.000218708	0.67159	FALSE	0.825657	-0.0927354	FALSE	0.419414	-0.156752	FALSE
Chr_1	790031	791281	+	1251	NCAS_0A03900	0.830817	-0.0562117	FALSE	1.21926e-10	1.20852	TRUE	0.08279	-0.335087	FALSE	0.000968367	-0.543545	FALSE
Chr_1	791578	793965	+	2388	NCAS_0A03910	3.71268e-05	0.599217	FALSE	8.48634e-25	1.66301	TRUE	0.00112248	0.536601	FALSE	0.0384711	0.351607	FALSE
Chr_1	793999	795417	-	1419	NCAS_0A03920	0.121396	0.254543	FALSE	0.00057151	0.571758	FALSE	0.487687	0.292051	FALSE	4.38515e-08	1.32865	TRUE
Chr_1	795607	797235	+	1629	NCAS_0A03930	0.0194326	0.320831	FALSE	2.42664e-07	0.758283	FALSE	0.0979039	0.33901	FALSE	0.000659579	0.585004	FALSE
Chr_1	797565	799301	+	1737	NCAS_0A03940	0.468988	0.143598	FALSE	1.82814e-41	2.36132	TRUE	0.732384	-0.133452	FALSE	0.540155	-0.130652	FALSE
Chr_1	801731	802672	-	942	NCAS_0A03960	0.486532	-0.197933	FALSE	1.12005e-07	1.21813	TRUE	0.894779	-0.0768277	FALSE	0.41145	-0.199357	FALSE
Chr_1	803163	804025	-	863	NCAS_0A03970	0.770968	-0.052749	FALSE	9.71238e-06	0.598753	FALSE	0.988432	0.0173119	FALSE	0.320432	0.398358	FALSE
Chr_1	804638	805565	+	928	NCAS_0A03980	0.863993	0.0382624	FALSE	8.8152e-05	0.596259	FALSE	0.904896	-0.0684402	FALSE	0.989938	0.00365742	FALSE
Chr_1	805973	806296	-	324	NCAS_0A03990	0.195765	-0.222777	FALSE	3.16772e-05	0.688402	FALSE	0.953199	-0.043261	FALSE	1.46723e-06	1.0528	TRUE
Chr_1	806883	808760	-	1878	NCAS_0A04000	0.403765	0.175772	FALSE	3.49522e-29	1.94892	TRUE	0.996551	-0.00310771	FALSE	0.44189	-0.158987	FALSE
Chr_1	809163	810299	-	1137	NCAS_0A04010	1.33486e-07	0.850297	FALSE	1.9586e-24	1.88704	TRUE	0.284039	0.280813	FALSE	0.412483	-0.177545	FALSE
Chr_1	811487	812518	-	1032	NCAS_0A04020	0.372636	0.141817	FALSE	3.10762e-11	0.925723	FALSE	0.882225	0.0959373	FALSE	0.072278	0.438993	FALSE
Chr_1	813592	814152	+	561	NCAS_0A04030	0.998161	0.0147804	FALSE	0.000247832	0.793764	FALSE	0.0409506	-0.376775	FALSE	0.00233465	-0.514861	FALSE
Chr_1	814524	815312	+	789	NCAS_0A04040	0.935196	0.0402998	FALSE	2.64824e-09	1.12308	TRUE	0.112997	0.372971	FALSE	0.0107272	0.509351	FALSE
Chr_1	815672	818665	+	2994	NCAS_0A04050	0.165608	0.268353	FALSE	5.38842e-19	1.65113	TRUE	0.594282	0.149042	FALSE	0.0326774	-0.339782	FALSE
Chr_1	818949	819197	+	249	NCAS_0A04060	0.000846843	0.429785	FALSE	6.69988e-12	0.988053	FALSE	0.875093	0.0689427	FALSE	0.897197	0.0288593	FALSE
Chr_1	819753	821891	+	2139	NCAS_0A04070	0.160364	0.273185	FALSE	9.15088e-19	1.56783	TRUE	0.363905	0.231776	FALSE	0.914638	-0.0231566	FALSE
Chr_1	822284	824887	+	2604	NCAS_0A04080	1	-0.0448057	FALSE	0.835593	0.175739	FALSE	0.490981	1.08323	FALSE	0.104381	1.82879	FALSE
Chr_1	825742	827172	+	1431	NCAS_0A04090	0.3259	0.22555	FALSE	6.97744e-21	1.96241	TRUE	0.940591	-0.0419534	FALSE	0.414725	-0.173514	FALSE
Chr_1	827360	828814	-	1455	NCAS_0A04100	0.847883	-0.042275	FALSE	8.962e-23	1.77422	TRUE	0.289931	-0.222596	FALSE	3.21969e-06	-0.688441	FALSE
Chr_1	829352	833095	-	3744	NCAS_0A04110	0.959601	0.0239861	FALSE	4.04958e-13	1.72179	TRUE	0.962452	-0.0222369	FALSE	0.0787118	-0.279594	FALSE
Chr_1	833424	836837	-	3414	NCAS_0A04120	0.768006	0.082364	FALSE	1.41648e-16	1.56762	TRUE	0.96777	-0.0201717	FALSE	0.0646355	-0.314746	FALSE
Chr_1	837211	839709	-	2499	NCAS_0A04130	8.84696e-74	2.56856	TRUE	1.74917e-99	3.59505	TRUE	6.19447e-53	2.18595	TRUE	3.83494e-36	1.80579	TRUE
Chr_1	840430	841206	+	777	NCAS_0A04140	0.934642	0.0209423	FALSE	0.000153972	0.606661	FALSE	0.757754	-0.119464	FALSE	0.756807	-0.0671618	FALSE
Chr_1	841619	843397	+	1779	NCAS_0A04150	0.598918	0.0948115	FALSE	2.09116e-11	0.995619	FALSE	0.862031	-0.0773677	FALSE	0.219191	-0.229278	FALSE
Chr_1	844321	846144	-	1824	NCAS_0A04160	0.887242	0.0380772	FALSE	2.30619e-21	1.6253	TRUE	0.202676	-0.252207	FALSE	2.52655e-07	-0.75678	FALSE
Chr_1	847181	848446	+	1266	NCAS_0A04170	0.0497325	0.265924	FALSE	1.89675e-19	1.26156	TRUE	0.412702	0.259508	FALSE	0.00374811	0.602607	FALSE
Chr_1	849866	850999	+	1134	NCAS_0A04180	0.896955	0.0344025	FALSE	5.99298e-22	1.49177	TRUE	0.623772	-0.152804	FALSE	0.000564045	-0.566854	FALSE
Chr_1	851201	851920	-	720	NCAS_0A04190	0.85732	-0.0372154	FALSE	1.71108e-06	0.907563	FALSE	0.207821	-0.267469	FALSE	0.000299606	-0.588634	FALSE
Chr_1	852331	852945	+	615	NCAS_0A04200	0.210591	0.200967	FALSE	1.4401e-08	0.892466	FALSE	0.986292	0.0139035	FALSE	0.0177592	0.483303	FALSE
Chr_1	853227	855020	+	1794	NCAS_0A04210	0.946406	-0.0123162	FALSE	1.37428e-13	1.15994	TRUE	0.338183	-0.229134	FALSE	0.0282457	-0.378389	FALSE
Chr_1	855791	857353	+	1563	NCAS_0A04220	0.632428	0.112685	FALSE	8.84502e-25	1.71921	TRUE	0.910636	-0.0508525	FALSE	0.0266644	-0.362277	FALSE
Chr_1	857443	857652	-	210	NCAS_0A04230	0.0462225	0.353085	FALSE	8.53366e-06	0.79895	FALSE	0.351685	0.37028	FALSE	0.358539	0.283786	FALSE
Chr_1	857955	858356	-	402	NCAS_0A04240	0.965019	0.0117209	FALSE	3.61691e-06	0.766025	FALSE	0.908144	0.0667836	FALSE	0.0676143	0.366677	FALSE
Chr_1	858528	858863	+	336	NCAS_0A04250	0.330001	0.231499	FALSE	4.86634e-06	0.910509	FALSE	0.491778	0.250421	FALSE	0.801014	-0.0692247	FALSE
Chr_1	858984	861152	-	2169	NCAS_0A04260	0.761785	0.0679517	FALSE	3.74127e-22	1.56945	TRUE	0.633231	-0.146118	FALSE	0.00218217	-0.495712	FALSE
Chr_1	862892	864156	+	1265	NCAS_0A04270	1.17521e-06	0.633512	FALSE	2.64593e-63	2.53792	TRUE	0.0200785	0.622639	FALSE	3.00811e-08	1.30338	TRUE
Chr_1	864327	866648	-	2322	NCAS_0A04280	3.52033e-05	0.599455	FALSE	2.12989e-16	1.33936	TRUE	0.000876797	0.521951	FALSE	0.240126	0.201909	FALSE
Chr_1	866963	868282	-	1320	NCAS_0A04290	0.756116	0.104082	FALSE	1.55084e-08	1.25995	TRUE	0.513524	0.187478	FALSE	0.613496	-0.104365	FALSE
Chr_1	868619	869356	-	738	NCAS_0A04300	0.0477939	0.347975	FALSE	7.19606e-27	1.88694	TRUE	0.779073	0.111826	FALSE	0.0347838	-0.37489	FALSE
Chr_1	869632	873330	-	3699	NCAS_0A04310	0.762919	0.0638397	FALSE	6.22079e-13	1.10565	TRUE	0.821348	-0.0937506	FALSE	0.594067	-0.108006	FALSE
Chr_1	873722	875791	-	2070	NCAS_0A04320	1.14479e-11	0.895391	FALSE	7.21927e-34	1.895	TRUE	3.42195e-06	0.972783	FALSE	9.54266e-09	1.18085	TRUE
Chr_1	876226	877119	-	894	NCAS_0A04330	0.197764	0.222284	FALSE	5.25996e-05	0.647219	FALSE	0.218271	0.36176	FALSE	0.0356191	0.488667	FALSE
Chr_1	877390	877719	-	330	NCAS_0A04340	0.478357	0.453856	FALSE	0.000147805	2.88456	TRUE	0.857205	0.512444	FALSE	0.724306	0.486723	FALSE
Chr_1	878688	880397	+	1710	NCAS_0A04350	0.795483	0.0650734	FALSE	1.52078e-13	1.38655	TRUE	0.237744	-0.287741	FALSE	0.40306	-0.174848	FALSE
Chr_1	880768	882822	+	2055	NCAS_0A04360	0.749846	0.0597888	FALSE	1.97437e-11	0.926125	FALSE	0.548554	-0.169073	FALSE	0.00527874	-0.459557	FALSE
Chr_1	883139	885058	+	1920	NCAS_0A04370	0.340459	0.21884	FALSE	3.99526e-22	1.98066	TRUE	0.960607	-0.0245046	FALSE	0.0161442	-0.379513	FALSE
Chr_1	885560	887281	+	1722	NCAS_0A04380	0.00479727	0.463928	FALSE	9.03942e-18	1.49065	TRUE	0.694599	0.115825	FALSE	0.711429	-0.0657807	FALSE
Chr_1	887448	887921	-	474	NCAS_0A04390	0.159108	0.235323	FALSE	2.96727e-11	1.05708	TRUE	0.969493	-0.0168731	FALSE	0.0286949	-0.337075	FALSE
Chr_1	888188	890743	+	2556	NCAS_0A04400	2.17995e-16	1.10857	TRUE	2.81855e-40	2.12784	TRUE	4.02189e-09	0.952593	FALSE	2.60727e-07	0.845741	FALSE
Chr_1	891313	892284	+	972	NCAS_0A04410	9.74047e-05	0.680995	FALSE	5.78267e-21	1.81707	TRUE	0.000368961	0.518185	FALSE	0.392268	0.143496	FALSE
Chr_1	892456	893094	-	639	NCAS_0A04420	4.91758e-09	0.934892	FALSE	2.33066e-18	1.61023	TRUE	0.00152052	0.544869	FALSE	0.613113	0.105672	FALSE
Chr_1	894139	894855	+	717	NCAS_0A04430	0.814209	-0.0411833	FALSE	0.00990841	0.330278	FALSE	0.956153	-0.035543	FALSE	0.160365	0.311169	FALSE
Chr_1	895181	896935	-	1755	NCAS_0A04440	0.0679676	0.320502	FALSE	5.52522e-19	1.5489	TRUE	0.744164	0.112682	FALSE	0.911384	-0.0224297	FALSE
Chr_1	897030	898109	-	1080	NCAS_0A04450	0.345122	0.189748	FALSE	3.92112e-08	0.989371	FALSE	0.777921	-0.105081	FALSE	0.0013431	-0.516452	FALSE
Chr_1	898770	899924	+	1155	NCAS_0A04460	0.00223524	0.44626	FALSE	1.6316e-28	1.73452	TRUE	0.415801	0.26342	FALSE	8.28998e-07	0.984979	FALSE
Chr_1	900638	901873	+	1236	NCAS_0A04470	0.746934	-0.0665215	FALSE	5.90198e-18	1.68285	TRUE	0.928269	-0.0522279	FALSE	0.24962	-0.255644	FALSE
Chr_1	901897	902898	-	1002	NCAS_0A04480	1.04989e-10	0.96769	FALSE	3.35337e-13	1.28428	TRUE	0.000333009	0.500426	FALSE	0.249552	0.1782	FALSE
Chr_1	904293	905567	+	1275	NCAS_0A04490	0.506179	-0.138795	FALSE	9.69439e-26	2.00122	TRUE	0.430768	-0.282995	FALSE	0.897094	-0.0389432	FALSE
Chr_1	905889	906992	+	1104	NCAS_0A04500	0.468467	0.445166	FALSE	2.16007e-08	2.15664	TRUE	0.999463	0.00365538	FALSE	0.956906	-0.0125519	FALSE
Chr_1	907090	907803	-	714	NCAS_0A04510	0.0411978	0.438206	FALSE	2.03855e-30	2.20889	TRUE	0.920811	0.0670239	FALSE	0.96135	-0.013619	FALSE
Chr_1	907999	909327	+	1329	NCAS_0A04520	0.081394	0.271963	FALSE	2.03101e-15	1.21669	TRUE	0.612711	0.153628	FALSE	0.156077	-0.248701	FALSE
Chr_1	909560	910549	-	990	NCAS_0A04530	0.0322138	0.375274	FALSE	1.09666e-40	2.28393	TRUE	0.560001	0.165626	FALSE	0.189106	-0.232911	FALSE
Chr_1	910773	912539	+	1767	NCAS_0A04540	0.333598	0.165787	FALSE	6.67764e-17	1.27075	TRUE	0.836762	0.0887129	FALSE	0.337394	-0.183753	FALSE
Chr_1	913293	913811	-	519	NCAS_0A04550	0.998421	0.0258618	FALSE	2.59491e-05	1.22522	TRUE	0.818195	-0.0953009	FALSE	7.31439e-06	-0.74477	FALSE
Chr_1	914067	914516	+	450	NCAS_0A04560	0.101689	0.290332	FALSE	5.30846e-14	1.25402	TRUE	0.962457	-0.0258357	FALSE	0.538002	-0.129768	FALSE
Chr_1	914710	915399	+	690	NCAS_0A04570	0.78754	0.104173	FALSE	1.28023e-08	1.1668	TRUE	0.373372	0.237058	FALSE	0.274338	-0.22162	FALSE
Chr_1	915547	917301	-	1755	NCAS_0A04580	0.584717	0.111028	FALSE	3.72173e-16	1.36071	TRUE	0.60356	-0.143173	FALSE	0.0028554	-0.449914	FALSE
Chr_1	917807	918478	-	672	NCAS_0A04590	0.427578	0.151295	FALSE	6.71018e-18	1.48179	TRUE	0.708437	-0.172273	FALSE	0.19254	0.313037	FALSE
Chr_1	919055	919705	-	651	NCAS_0A04600	0.824406	-0.0391251	FALSE	2.39655e-10	0.850856	FALSE	0.861333	-0.091362	FALSE	0.332992	0.220208	FALSE
Chr_1	920701	921612	+	912	NCAS_0A04610	0.543842	0.16823	FALSE	1.80109e-54	3.34782	TRUE	0.838617	-0.136412	FALSE	0.333019	-0.300996	FALSE
Chr_1	921854	922996	+	1143	NCAS_0A04620	0.845745	0.0703841	FALSE	6.20677e-07	1.04031	TRUE	0.96689	-0.0200407	FALSE	0.117719	-0.270142	FALSE
Chr_1	923022	925820	+	2799	NCAS_0A04630	0.0636069	0.290621	FALSE	1.45441e-41	2.08547	TRUE	0.937557	0.0445879	FALSE	0.850098	0.0452695	FALSE
Chr_1	925953	927362	-	1410	NCAS_0A04640	0.240521	0.229661	FALSE	3.48234e-15	1.41878	TRUE	0.847684	0.0778019	FALSE	0.864236	-0.0348011	FALSE
Chr_1	927570	930110	+	2541	NCAS_0A04650	0.000138315	0.651596	FALSE	6.98232e-18	1.64415	TRUE	0.00469034	0.490799	FALSE	0.0347166	0.366441	FALSE
Chr_1	930427	931407	+	981	NCAS_0A04660	0.933495	0.0213976	FALSE	2.43773e-06	0.68976	FALSE	0.632919	-0.158834	FALSE	0.209565	-0.239902	FALSE
Chr_1	931524	931985	-	462	NCAS_0A04670	0.158783	0.341074	FALSE	3.84463e-09	1.28236	TRUE	0.958872	0.0306042	FALSE	0.0296387	-0.400338	FALSE
Chr_1	932306	933130	-	825	NCAS_0A04680	1.70355e-05	0.996264	FALSE	1.17129e-07	1.36828	TRUE	0.000519029	0.802073	FALSE	0.0192947	0.561954	FALSE
Chr_1	933715	934506	-	792	NCAS_0A04690	0.612736	-0.108688	FALSE	1.45472e-06	1.06906	TRUE	0.180356	-0.327321	FALSE	0.03605	-0.426746	FALSE
Chr_1	934919	936493	+	1575	NCAS_0A04700	0.349373	0.169528	FALSE	4.44312e-08	0.88365	FALSE	0.907371	-0.0472747	FALSE	0.00456842	-0.400629	FALSE
Chr_1	938646	940211	+	1566	NCAS_0A04710	0.833033	0.100691	FALSE	2.40727e-06	1.22381	TRUE	0.860183	-0.0946708	FALSE	0.96559	-0.0134523	FALSE
Chr_1	940523	941431	+	909	NCAS_0A04720	0.917503	0.0597413	FALSE	3.4143e-06	1.07641	TRUE	0.925952	0.050092	FALSE	0.0416754	-0.377909	FALSE
Chr_1	941827	942501	+	675	NCAS_0A04730	0.950667	0.0519229	FALSE	6.47444e-07	0.997208	FALSE	0.959411	0.0336685	FALSE	0.750229	-0.0761089	FALSE
Chr_1	942804	944459	+	1656	NCAS_0A04740	0.24155	0.165659	FALSE	4.86482e-24	1.34858	TRUE	0.587156	-0.149264	FALSE	0.149077	-0.236068	FALSE
Chr_1	944929	948354	+	3426	NCAS_0A04750	0.029595	0.354725	FALSE	1.85673e-10	1.07322	TRUE	0.730015	-0.113799	FALSE	0.0753782	-0.288629	FALSE
Chr_1	948786	951071	+	2286	NCAS_0A04760	0.280398	0.185052	FALSE	3.29782e-21	1.44404	TRUE	0.783136	-0.107909	FALSE	0.0132786	-0.426402	FALSE
Chr_1	951479	952150	+	672	NCAS_0A04770	0.192058	0.256242	FALSE	3.11597e-07	0.945253	FALSE	0.756529	0.101887	FALSE	0.100653	-0.254937	FALSE
Chr_1	953537	956722	+	3186	NCAS_0A04780	3.87823e-05	0.626447	FALSE	8.56416e-32	2.00789	TRUE	0.0020063	0.466918	FALSE	0.769573	0.0558195	FALSE
Chr_1	956993	958660	-	1668	NCAS_0A04790	0.254636	0.239578	FALSE	1.11816e-19	1.70175	TRUE	0.760231	-0.11532	FALSE	0.51272	-0.129756	FALSE
Chr_1	959067	960602	-	1536	NCAS_0A04800	0.286757	-0.238684	FALSE	6.63015e-07	1.12683	TRUE	0.849264	0.18932	FALSE	0.00103033	1.20689	TRUE
Chr_1	961785	963764	-	1980	NCAS_0A04810	3.3667e-11	0.816879	FALSE	4.57265e-20	1.33519	TRUE	2.07238e-09	1.06494	TRUE	2.75127e-16	1.43056	TRUE
Chr_1	964818	966233	+	1416	NCAS_0A04820	0.962162	-0.00412508	FALSE	1.66637e-10	1.29944	TRUE	0.971259	-0.018806	FALSE	0.0766417	-0.346168	FALSE
Chr_1	966549	967862	+	1314	NCAS_0A04830	0.674753	0.118147	FALSE	0.000320159	0.78723	FALSE	0.84152	0.0910562	FALSE	0.471288	0.14928	FALSE
Chr_1	968240	969133	+	894	NCAS_0A04840	2.33209e-51	2.05814	TRUE	5.8213e-41	2.20285	TRUE	5.38126e-35	1.92199	TRUE	6.45831e-36	1.9565	TRUE
Chr_1	969291	970244	-	954	NCAS_0A04850	0.620311	0.119283	FALSE	1.29993e-22	1.73775	TRUE	0.968791	-0.02477	FALSE	0.331905	-0.22585	FALSE
Chr_1	970512	973340	-	2829	NCAS_0A04860	0.79192	-0.0717626	FALSE	5.32597e-10	1.38533	TRUE	0.716077	-0.126527	FALSE	0.0981374	-0.291737	FALSE
Chr_1	973552	975021	+	1470	NCAS_0A04870	0.725721	0.0719523	FALSE	3.7642e-20	1.38723	TRUE	0.999463	0.00363252	FALSE	0.0325465	0.479085	FALSE
Chr_1	975218	977980	+	2763	NCAS_0A04880	0.0171224	0.484766	FALSE	2.42559e-36	2.47572	TRUE	0.368507	0.293698	FALSE	0.413621	0.207589	FALSE
Chr_1	978214	978531	-	318	NCAS_0A04890	0.00183387	0.436118	FALSE	9.67338e-19	1.35034	TRUE	0.579323	0.166588	FALSE	0.0425154	0.352897	FALSE
Chr_1	979125	980927	-	1803	NCAS_0A04900	1.15628e-08	0.945883	FALSE	1.15328e-09	1.1837	TRUE	0.000551035	0.499237	FALSE	0.246286	0.1842	FALSE
Chr_1	981106	981630	-	525	NCAS_0A04910	0.220199	0.235636	FALSE	1.58165e-11	1.18466	TRUE	0.97615	-0.0152719	FALSE	0.481261	0.163369	FALSE
Chr_1	981801	982550	+	750	NCAS_0A04920	0.00921331	0.360741	FALSE	8.25156e-17	1.21861	TRUE	0.669409	0.141625	FALSE	0.264465	-0.20432	FALSE
Chr_1	982782	984605	+	1824	NCAS_0A04930	1.75644e-13	1.45137	TRUE	2.80195e-24	2.28512	TRUE	8.02318e-11	1.17544	TRUE	2.46173e-05	0.8018	FALSE
Chr_1	984795	986009	+	1215	NCAS_0A04940	7.4648e-10	0.916339	FALSE	1.14001e-14	1.33247	TRUE	0.000303192	0.597274	FALSE	0.113727	0.283297	FALSE
Chr_1	986116	987483	-	1368	NCAS_0A04950	1.6256e-07	0.726957	FALSE	1.69944e-13	1.18454	TRUE	0.00388274	0.483766	FALSE	0.780464	0.0587093	FALSE
Chr_1	987762	989507	-	1746	NCAS_0A04960	0.973729	0.0142025	FALSE	4.70014e-16	1.34744	TRUE	0.83538	-0.0939335	FALSE	0.325422	-0.19955	FALSE
Chr_1	989783	991951	+	2169	NCAS_0A04970	0.869992	-0.0339461	FALSE	2.80626e-11	0.959255	FALSE	0.685014	-0.133725	FALSE	0.0381156	-0.349081	FALSE
Chr_1	992377	992985	+	609	NCAS_0A04980	0.0210573	0.895307	FALSE	0.00079173	1.30269	TRUE	2.08332e-05	1.25835	TRUE	0.0226084	0.745105	FALSE
Chr_1	993133	993834	-	702	NCAS_0A04990	0.926701	0.030655	FALSE	7.22906e-12	1.07593	TRUE	0.882225	-0.0815488	FALSE	0.229253	-0.265381	FALSE
Chr_1	994227	994946	+	720	NCAS_0A05000	2.32851e-12	1.27606	TRUE	7.51373e-22	2.00002	TRUE	6.7251e-11	1.12332	TRUE	0.000112848	0.705444	FALSE
Chr_1	996896	997708	+	813	NCAS_0A05020	1.18874e-44	2.57988	TRUE	3.39051e-07	1.16941	TRUE	1.32762e-51	2.61472	TRUE	5.21379e-42	2.36564	TRUE
Chr_1	998101	999573	+	1473	NCAS_0A05030	1.01622e-34	1.91683	TRUE	1.67706e-14	1.45521	TRUE	5.32369e-32	1.71986	TRUE	4.89582e-20	1.35739	TRUE
Chr_1	1000245	1001873	+	1629	NCAS_0A05040	0.00332522	0.558137	FALSE	7.99199e-10	1.23022	TRUE	0.0360269	0.425074	FALSE	0.630912	0.107512	FALSE
Chr_1	1002107	1004788	-	2682	NCAS_0A05050	0.740524	0.0794205	FALSE	5.08118e-13	1.25704	TRUE	0.912002	-0.0574556	FALSE	0.868314	-0.0381562	FALSE
Chr_1	1005175	1009461	-	4287	NCAS_0A05060	0.79925	0.0611362	FALSE	7.25644e-14	1.2512	TRUE	0.663421	-0.138857	FALSE	0.0956934	-0.284901	FALSE
Chr_1	1009748	1011025	-	1278	NCAS_0A05070	0.340986	-0.15845	FALSE	4.76991e-13	1.132	TRUE	0.902075	-0.0595477	FALSE	0.895005	0.0295592	FALSE
Chr_1	1011572	1012924	+	1353	NCAS_0A05080	8.46977e-15	1.08148	TRUE	1.14751e-20	1.5358	TRUE	3.09736e-08	0.807528	FALSE	0.000617564	0.524956	FALSE
Chr_1	1013061	1014065	-	1005	NCAS_0A05090	0.385494	0.586782	FALSE	2.14739e-06	3.72586	TRUE	1	0	FALSE	1	1.9484	FALSE
Chr_1	1014317	1015333	-	1017	NCAS_0A05100	7.74565e-10	1.93779	TRUE	1.11024e-15	2.71418	TRUE	1.6912e-16	2.52091	TRUE	2.70298e-18	2.69499	TRUE
Chr_1	1016017	1018644	+	2628	NCAS_0A05110	0.716656	0.0874407	FALSE	1.01141e-11	1.15599	TRUE	0.940591	-0.0416458	FALSE	0.34169	-0.199023	FALSE
Chr_1	1018924	1020162	+	1239	NCAS_0A05120	0.000389041	0.693826	FALSE	4.57949e-17	1.78677	TRUE	0.00555542	0.514996	FALSE	0.246185	0.228819	FALSE
Chr_1	1020310	1021185	-	876	NCAS_0A05130	0.895191	-0.061302	FALSE	1.33496e-36	2.74733	TRUE	0.857501	0.104611	FALSE	0.702149	0.108564	FALSE
Chr_1	1021439	1023718	+	2280	NCAS_0A05140	0.00248644	0.454822	FALSE	7.76638e-33	1.9419	TRUE	0.151068	0.286526	FALSE	0.943237	0.0161	FALSE
Chr_1	1023977	1025518	+	1542	NCAS_0A05150	0.171967	0.226779	FALSE	1.41511e-32	1.87266	TRUE	0.971259	-0.0168386	FALSE	0.0500947	-0.322227	FALSE
Chr_1	1025828	1026064	-	237	NCAS_0A05160	0.633617	-0.0871223	FALSE	1.23206e-05	0.6577	FALSE	0.904658	-0.0676638	FALSE	0.936399	-0.0204626	FALSE
Chr_1	1026368	1027606	-	1239	NCAS_0A05170	0.858146	0.0734766	FALSE	2.95862e-17	1.82815	TRUE	0.901712	-0.0565879	FALSE	0.0181978	-0.383775	FALSE
Chr_1	1027837	1028604	+	768	NCAS_0A05180	4.28022e-09	1.06776	TRUE	7.57382e-36	2.46097	TRUE	1.04581e-09	1.04896	TRUE	5.82625e-06	0.810038	FALSE
Chr_1	1028655	1029734	+	1080	NCAS_0A05190	0.000114364	0.549771	FALSE	1.04297e-31	1.85007	TRUE	0.00871739	0.499668	FALSE	0.00183279	0.565157	FALSE
Chr_1	1030146	1031090	+	945	NCAS_0A05200	0.942515	0.0392144	FALSE	0.00116115	1.02379	TRUE	0.916901	0.049288	FALSE	0.198249	-0.221826	FALSE
Chr_1	1031496	1032545	+	1050	NCAS_0A05210	0.98614	-0.00329922	FALSE	2.45535e-19	1.43716	TRUE	0.313996	-0.261981	FALSE	0.749427	-0.0740331	FALSE
Chr_1	1032827	1033996	+	1170	NCAS_0A05220	0.0339707	0.310602	FALSE	1.33433e-14	1.13853	TRUE	0.344551	0.247078	FALSE	0.115022	0.304101	FALSE
Chr_1	1034523	1036880	+	2358	NCAS_0A05230	0.121294	0.307761	FALSE	6.84725e-08	1.06441	TRUE	0.484427	-0.18082	FALSE	0.142757	-0.249589	FALSE
Chr_1	1037055	1037975	-	921	NCAS_0A05240	4.90275e-05	0.638142	FALSE	4.20202e-17	1.46745	TRUE	0.00787638	0.465018	FALSE	0.216735	0.227238	FALSE
Chr_1	1038189	1038776	+	588	NCAS_0A05250	8.36205e-27	1.62971	TRUE	3.63066e-45	2.48922	TRUE	3.65094e-15	1.38016	TRUE	9.1302e-08	0.975888	FALSE
Chr_1	1039187	1040596	-	1410	NCAS_0A05260	0.567423	-0.145484	FALSE	3.36451e-12	1.63293	TRUE	0.768997	0.117776	FALSE	0.0552855	-0.350224	FALSE
Chr_1	1042604	1044337	+	1734	NCAS_0A05270	0.693345	0.0949177	FALSE	2.62737e-30	1.99013	TRUE	0.0159105	-0.408023	FALSE	7.26341e-06	-0.687181	FALSE
Chr_1	1045511	1046347	+	837	NCAS_0A05280	0.422536	0.249743	FALSE	2.4292e-18	1.98595	TRUE	0.925952	0.0490795	FALSE	0.587599	0.117132	FALSE
Chr_1	1047369	1050149	-	2781	NCAS_0A05290	2.50758e-21	1.48989	TRUE	1.3053e-17	1.60312	TRUE	1.20448e-18	1.65987	TRUE	1.29988e-17	1.61792	TRUE
Chr_1	1052884	1053849	+	966	NCAS_0A05320	2.00697e-08	0.67202	FALSE	3.8161e-22	1.35738	TRUE	0.0652298	0.361248	FALSE	0.310922	0.193291	FALSE
Chr_1	1054164	1055234	+	1071	NCAS_0A05330	6.72233e-23	1.64267	TRUE	5.27359e-22	1.90908	TRUE	1.18328e-15	1.35423	TRUE	8.15234e-14	1.28206	TRUE
Chr_1	1055424	1058774	-	3351	NCAS_0A05340	0.737065	0.0799222	FALSE	3.09091e-27	1.72669	TRUE	0.699762	-0.130268	FALSE	0.00431025	-0.472729	FALSE
Chr_1	1058940	1059704	+	765	NCAS_0A05350	0.00545866	0.563703	FALSE	1.94293e-14	1.59596	TRUE	0.38679	0.274101	FALSE	0.0214656	0.498065	FALSE
Chr_1	1059907	1061592	+	1686	NCAS_0A05360	0.307333	0.161154	FALSE	5.26099e-16	1.16835	TRUE	0.534864	-0.157898	FALSE	0.00566103	-0.416358	FALSE
Chr_1	1061671	1066197	-	4527	NCAS_0A05370	0.219726	0.21626	FALSE	2.82133e-20	1.51177	TRUE	0.8318	0.0880206	FALSE	0.336596	-0.179179	FALSE
Chr_1	1066582	1067664	+	1083	NCAS_0A05380	0.313005	0.19732	FALSE	3.88801e-25	1.72164	TRUE	0.926306	0.0507431	FALSE	0.458034	-0.151714	FALSE
Chr_1	1067778	1067999	-	222	NCAS_0A05390	0.231195	0.231502	FALSE	0.000817896	0.583479	FALSE	0.867018	-0.0792425	FALSE	0.0062434	-0.498485	FALSE
Chr_1	1068214	1070523	+	2310	NCAS_0A05400	0.0040442	0.436683	FALSE	1.90244e-13	1.20353	TRUE	0.0397925	0.358683	FALSE	0.10495	0.270158	FALSE
Chr_1	1070814	1071764	+	951	NCAS_0A05410	0.275111	0.17189	FALSE	3.84459e-17	1.19861	TRUE	0.79089	-0.100139	FALSE	0.288581	-0.190452	FALSE
Chr_1	1071960	1073744	-	1785	NCAS_0A05420	0.00357321	0.44272	FALSE	1.49583e-24	1.67566	TRUE	0.865378	-0.0762887	FALSE	0.0266251	-0.39855	FALSE
Chr_1	1075589	1075918	+	330	NCAS_0A05440	0.0144833	1.80516	TRUE	0.000785687	2.60762	TRUE	0.995509	0.0147337	FALSE	0.888265	0.115557	FALSE
Chr_1	1076084	1076356	-	273	NCAS_0A05450	0.192184	0.243295	FALSE	6.30967e-10	1.09301	TRUE	0.949277	-0.0316122	FALSE	0.00403995	-0.464118	FALSE
Chr_1	1076938	1077213	-	276	NCAS_0A05460	0.208033	0.240237	FALSE	4.18849e-05	0.738293	FALSE	0.694599	0.241501	FALSE	0.190702	0.422641	FALSE
Chr_1	1077464	1079413	+	1950	NCAS_0A05470	0.554693	0.152097	FALSE	2.6346e-14	1.56935	TRUE	0.978293	-0.0133438	FALSE	0.0637556	-0.316208	FALSE
Chr_1	1079536	1081416	-	1881	NCAS_0A05480	0.0299449	0.322142	FALSE	1.74544e-32	1.79951	TRUE	0.969493	0.0208814	FALSE	0.771888	-0.0632819	FALSE
Chr_1	1081626	1082402	+	777	NCAS_0A05490	0.144464	0.285983	FALSE	1.39444e-12	1.27452	TRUE	0.972663	-0.0171648	FALSE	0.655218	-0.0985852	FALSE
Chr_1	1082469	1083584	-	1116	NCAS_0A05500	1.93376e-14	0.965969	FALSE	1.65167e-48	2.18656	TRUE	6.35361e-07	0.986945	FALSE	2.8426e-11	1.29062	TRUE
Chr_1	1083826	1085028	+	1203	NCAS_0A05510	0.0176906	0.293197	FALSE	3.46358e-40	1.74768	TRUE	0.940591	-0.0361092	FALSE	0.885798	0.0303171	FALSE
Chr_1	1085200	1087215	-	2016	NCAS_0A05520	0.82255	0.0581512	FALSE	1.00254e-13	1.2543	TRUE	0.983916	0.0138437	FALSE	0.597203	0.127398	FALSE
Chr_1	1088381	1089730	+	1350	NCAS_0A05530	0.253673	0.634568	FALSE	2.28637e-34	4.37073	TRUE	0.132978	0.618308	FALSE	0.132828	0.552731	FALSE
Chr_1	1089997	1090983	+	987	NCAS_0A05540	0.0469586	1.50013	TRUE	0.0013424	2.52566	TRUE	1	0	FALSE	1	2.29203	FALSE
Chr_1	1091195	1092655	+	1461	NCAS_0A05550	0.607049	0.11107	FALSE	2.91256e-19	1.57163	TRUE	0.830238	-0.0935201	FALSE	0.140463	-0.283209	FALSE
Chr_1	1092905	1093312	+	408	NCAS_0A05560	0.191486	0.281704	FALSE	7.5467e-11	1.25563	TRUE	0.218683	0.458715	FALSE	8.65067e-09	1.54416	TRUE
Chr_1	1093653	1096409	+	2757	NCAS_0A05570	0.567356	0.116918	FALSE	2.36245e-14	1.1554	TRUE	0.999463	0.000345112	FALSE	0.965754	-0.010749	FALSE
Chr_1	1096691	1097875	+	1185	NCAS_0A05580	3.06255e-59	1.9901	TRUE	8.41543e-26	1.57798	TRUE	4.65055e-34	1.73418	TRUE	3.4836e-24	1.4591	TRUE
Chr_1	1098632	1099303	-	672	NCAS_0A05590	4.02876e-08	0.797874	FALSE	1.32306e-29	1.85377	TRUE	0.0668034	0.544409	FALSE	2.06464e-05	1.06532	TRUE
Chr_1	1099443	1100765	-	1323	NCAS_0A05600	0.0337852	0.419482	FALSE	6.1968e-21	1.83792	TRUE	0.458992	0.261534	FALSE	0.0149124	0.548018	FALSE
Chr_1	1100804	1101325	+	522	NCAS_0A05610	0.207939	0.224291	FALSE	2.80222e-08	0.902608	FALSE	0.962457	-0.0244823	FALSE	0.758325	-0.0694836	FALSE
Chr_1	1101421	1102593	-	1173	NCAS_0A05620	0.486483	0.175938	FALSE	9.48865e-13	1.45062	TRUE	0.963918	0.0329475	FALSE	0.567957	0.155623	FALSE
Chr_1	1102810	1104618	+	1809	NCAS_0A05630	0.566483	-0.125552	FALSE	5.4452e-17	1.7998	TRUE	0.882225	-0.0700373	FALSE	0.095988	-0.307166	FALSE
Chr_1	1104852	1105445	-	594	NCAS_0A05640	0.943361	0.0165309	FALSE	2.84885e-09	0.84853	FALSE	1	0.00106258	FALSE	0.153698	0.63535	FALSE
Chr_1	1106178	1106560	+	383	NCAS_0A05650	0.0119018	0.466081	FALSE	6.51391e-09	1.13825	TRUE	0.329527	0.216449	FALSE	0.513209	-0.119094	FALSE
Chr_1	1106601	1107410	-	810	NCAS_0A05660	0.548053	-0.118308	FALSE	0.000216271	0.636137	FALSE	0.906595	0.0751425	FALSE	0.0418012	0.457514	FALSE
Chr_1	1108263	1109606	+	1344	NCAS_0A05670	3.77878e-06	0.56352	FALSE	1.27016e-17	1.19509	TRUE	0.000435977	0.713817	FALSE	5.41369e-12	1.30866	TRUE
Chr_1	1109746	1111479	-	1734	NCAS_0A05680	0.457446	0.139876	FALSE	4.07282e-12	1.09007	TRUE	0.859161	-0.078678	FALSE	0.0027538	-0.514705	FALSE
Chr_1	1112005	1113249	-	1245	NCAS_0A05690	0.68864	0.0853524	FALSE	7.73265e-23	1.524	TRUE	0.982105	0.013171	FALSE	0.313697	-0.199438	FALSE
Chr_1	1113570	1115652	-	2083	NCAS_0A05700	0.844242	-0.149042	FALSE	0.0310974	1.14777	TRUE	0.649528	-0.133692	FALSE	0.00243126	-0.461609	FALSE
Chr_1	1115899	1116813	-	915	NCAS_0A05710	0.915979	0.0599446	FALSE	1.97473e-07	1.26952	TRUE	0.941609	-0.0354564	FALSE	0.00112477	-0.540263	FALSE
Chr_1	1117491	1119182	+	1692	NCAS_0A05720	0.00952365	0.429502	FALSE	1.65418e-15	1.35885	TRUE	0.0712767	0.577899	FALSE	1.11523e-07	1.39373	TRUE
Chr_1	1121257	1122573	+	1317	NCAS_0A05730	0.939207	-0.0120069	FALSE	1.55853e-167	4.23591	TRUE	0.259056	-0.298871	FALSE	0.159254	-0.297899	FALSE
Chr_1	1122874	1124454	+	1581	NCAS_0A05740	0.819607	0.0539808	FALSE	1.59669e-06	0.774595	FALSE	0.831261	-0.122976	FALSE	0.921881	0.0297249	FALSE
Chr_1	1124858	1127032	+	2175	NCAS_0A05750	0.423066	0.142575	FALSE	1.90364e-14	1.19234	TRUE	0.962457	-0.0216494	FALSE	0.0615158	-0.29047	FALSE
Chr_1	1127631	1131347	+	3717	NCAS_0A05760	0.090665	0.309053	FALSE	8.6425e-18	1.5346	TRUE	0.917896	0.0479579	FALSE	0.212069	-0.213804	FALSE
Chr_1	1132854	1137239	+	4386	NCAS_0A05770	0.0938177	0.334233	FALSE	0.000114895	0.768931	FALSE	0.836762	0.0839913	FALSE	0.284136	-0.191651	FALSE
Chr_1	1137409	1138176	-	768	NCAS_0A05780	0.76387	0.108451	FALSE	5.0793e-07	1.20387	TRUE	0.70906	-0.125293	FALSE	0.0227427	-0.378662	FALSE
Chr_1	1138434	1139522	+	1089	NCAS_0A05790	5.90341e-26	1.57666	TRUE	1.75564e-29	2.01332	TRUE	3.70719e-24	1.52264	TRUE	1.39994e-17	1.29894	TRUE
Chr_1	1141745	1142704	+	960	NCAS_0A05800	0.978155	0.0116311	FALSE	0.0970979	0.339144	FALSE	0.00748293	-0.424241	FALSE	1.8633e-08	-0.8093	FALSE
Chr_1	1143717	1145060	+	1344	NCAS_0A05810	0.264816	0.244053	FALSE	8.681e-12	1.3947	TRUE	0.314585	0.384223	FALSE	2.44805e-05	1.10713	TRUE
Chr_1	1145336	1146055	+	720	NCAS_0A05820	0.235052	0.270631	FALSE	5.3445e-12	1.41747	TRUE	0.908697	-0.0587613	FALSE	0.614301	-0.10681	FALSE
Chr_1	1146244	1147188	-	945	NCAS_0A05830	0.270622	0.242579	FALSE	5.86632e-11	1.28725	TRUE	0.531642	-0.167778	FALSE	0.00097131	-0.519748	FALSE
Chr_1	1147572	1148495	+	924	NCAS_0A05840	0.910544	-0.0234431	FALSE	1.05804e-10	1.10724	TRUE	0.837443	-0.0821675	FALSE	0.00359886	-0.469807	FALSE
Chr_1	1148816	1149250	+	435	NCAS_0A05850	0.00393321	0.533611	FALSE	1.87882e-11	1.32907	TRUE	0.241856	0.296774	FALSE	0.966038	0.0136612	FALSE
Chr_1	1150056	1150874	+	819	NCAS_0A05860	0.00342469	0.610829	FALSE	6.28269e-10	1.33776	TRUE	0.0577352	0.390745	FALSE	0.491034	0.148276	FALSE
Chr_1	1151047	1153857	-	2811	NCAS_0A05870	0.268243	-0.177175	FALSE	1.56871e-06	0.726282	FALSE	0.555824	-0.176915	FALSE	0.000986091	-0.56501	FALSE
Chr_1	1154364	1155587	-	1224	NCAS_0A05880	0.73378	0.066218	FALSE	7.12417e-08	0.765839	FALSE	0.768324	-0.107385	FALSE	0.00121677	-0.51567	FALSE
Chr_1	1156718	1157965	+	1248	NCAS_0A05890	0.761117	-0.0825581	FALSE	0.000142243	0.778997	FALSE	0.999826	0.000948123	FALSE	0.0581957	0.374735	FALSE
Chr_1	1158698	1160419	+	1722	NCAS_0A05900	0.510845	-0.131649	FALSE	5.20869e-27	1.83871	TRUE	0.00762062	-0.462087	FALSE	8.53291e-07	-0.785236	FALSE
Chr_1	1160799	1161890	-	1092	NCAS_0A05910	1.90961e-06	0.862445	FALSE	1.09914e-13	1.52708	TRUE	1.20796e-05	0.70878	FALSE	0.0240954	0.391061	FALSE
Chr_1	1162702	1165047	-	2346	NCAS_0A05920	0.612283	0.0853268	FALSE	1.48288e-46	1.9939	TRUE	0.81808	0.0838506	FALSE	0.965	-0.00931543	FALSE
Chr_1	1165589	1171333	-	5745	NCAS_0A05930	0.030582	0.309061	FALSE	2.3821e-20	1.38685	TRUE	0.821561	0.089129	FALSE	0.237997	-0.206414	FALSE
Chr_1	1171599	1172180	+	582	NCAS_0A05940	0.000232578	0.565241	FALSE	2.39225e-26	1.75862	TRUE	0.60165	0.199968	FALSE	0.90713	0.0310792	FALSE
Chr_1	1172691	1173623	+	933	NCAS_0A05950	0.861565	0.0132963	FALSE	5.25304e-05	3.20676	TRUE	0.0197824	2.6444	TRUE	0.0621609	1.93449	FALSE
Chr_1	1173851	1176613	-	2763	NCAS_0A05960	0.950667	0.0240388	FALSE	7.49831e-16	1.48436	TRUE	0.797559	-0.0982262	FALSE	0.00101766	-0.527618	FALSE
Chr_1	1177678	1181649	-	3972	NCAS_0A05970	0.260486	0.231226	FALSE	1.32521e-25	1.92282	TRUE	0.865184	-0.0755274	FALSE	0.211878	-0.233156	FALSE
Chr_1	1182295	1183953	+	1659	NCAS_0A05980	0.539993	-0.136842	FALSE	0.000346255	0.687337	FALSE	0.881966	-0.0715744	FALSE	0.820013	-0.0512129	FALSE
Chr_1	1184179	1184448	+	270	NCAS_0A05990	0.949572	0.052658	FALSE	0.0463643	1.19847	TRUE	0.131769	1.5433	FALSE	3.49193e-09	4.75683	TRUE
Chr_1	1184842	1187133	+	2292	NCAS_0A06000	0.0625165	0.318752	FALSE	1.44514e-22	1.6389	TRUE	0.948465	0.0353918	FALSE	0.685202	-0.0841697	FALSE
Chr_1	1187345	1190737	-	3393	NCAS_0A06010	0.477599	-0.181654	FALSE	1.84658e-06	1.08905	TRUE	0.839426	-0.0912348	FALSE	0.31697	-0.200205	FALSE
Chr_1	1191016	1192068	+	1053	NCAS_0A06020	0.911099	0.0491116	FALSE	3.19256e-06	0.901131	FALSE	0.999488	0.00247323	FALSE	0.901773	-0.0279322	FALSE
Chr_1	1192283	1193125	+	843	NCAS_0A06030	0.430245	0.145183	FALSE	4.93272e-09	0.944841	FALSE	0.53372	-0.161164	FALSE	0.00353876	-0.445379	FALSE
Chr_1	1193225	1194991	-	1767	NCAS_0A06040	4.36543e-19	1.24493	TRUE	9.82216e-33	1.96797	TRUE	6.26296e-12	1.01819	TRUE	1.16697e-08	0.861072	FALSE
Chr_1	1195217	1196467	+	1251	NCAS_0A06050	0.0911831	-0.394219	FALSE	1.52794e-14	1.8445	TRUE	0.42072	0.243206	FALSE	0.675457	-0.0997305	FALSE
Chr_1	1196692	1197459	-	768	NCAS_0A06060	0.984111	0.00490903	FALSE	4.38142e-05	0.55954	FALSE	0.883015	-0.0795345	FALSE	0.976222	-0.0084859	FALSE
Chr_1	1197908	1198585	+	678	NCAS_0A06070	0.000246859	0.655607	FALSE	7.15686e-10	1.22054	TRUE	0.0026103	0.541166	FALSE	0.125462	0.288555	FALSE
Chr_1	1198644	1201343	-	2700	NCAS_0A06080	0.752267	0.124148	FALSE	1.52819e-20	2.12476	TRUE	0.822501	0.09549	FALSE	0.0906292	-0.306517	FALSE
Chr_1	1201581	1202666	+	1086	NCAS_0A06090	0.0756796	1.35051	FALSE	5.62022e-10	4.2717	TRUE	0.645393	-0.687876	FALSE	0.135251	-1.32857	FALSE
Chr_1	1202876	1204015	+	1140	NCAS_0A06100	0.622686	0.11619	FALSE	4.75964e-09	1.06931	TRUE	0.962457	0.025668	FALSE	0.413512	-0.161237	FALSE
Chr_1	1204149	1205528	-	1380	NCAS_0A06110	3.71237e-14	1.25236	TRUE	6.43927e-19	1.73682	TRUE	2.9661e-15	1.23317	TRUE	6.20485e-09	0.932132	FALSE
Chr_1	1205795	1207426	-	1632	NCAS_0A06120	0.863945	0.0393115	FALSE	2.63649e-15	1.14514	TRUE	0.539392	-0.176209	FALSE	0.403897	-0.159363	FALSE
Chr_1	1207782	1209539	-	1758	NCAS_0A06130	0.81557	0.0529413	FALSE	3.04783e-06	0.731775	FALSE	0.971259	-0.0181922	FALSE	0.684421	-0.0845607	FALSE
Chr_1	1210531	1211904	+	1374	NCAS_0A06140	0.147562	0.242414	FALSE	2.00194e-28	1.72964	TRUE	0.797942	0.0897422	FALSE	0.00387341	-0.429763	FALSE
Chr_1	1212220	1216749	+	4530	NCAS_0A06150	0.565786	0.102578	FALSE	2.00151e-17	1.25031	TRUE	0.973942	-0.0156187	FALSE	0.321874	-0.180694	FALSE
Chr_1	1217296	1218238	+	943	NCAS_0A06160	0.571829	-0.107986	FALSE	0.00145037	0.512573	FALSE	0.988661	0.0110873	FALSE	0.293531	0.277316	FALSE
Chr_1	1220081	1221229	+	1149	NCAS_0A06170	0.950913	-0.0193932	FALSE	0.0229411	0.526114	FALSE	0.90328	-0.0578162	FALSE	0.242335	-0.2085	FALSE
Chr_1	1222196	1225384	+	3189	NCAS_0A06180	0.250121	0.17459	FALSE	3.24278e-36	1.79336	TRUE	0.901327	-0.0570388	FALSE	0.827716	0.0442982	FALSE
Chr_1	1226184	1228868	+	2685	NCAS_0A06190	0.16427	0.253266	FALSE	1.71787e-21	1.60629	TRUE	0.949277	0.032929	FALSE	0.646535	-0.0901058	FALSE
Chr_1	1229023	1229502	-	480	NCAS_0A06200	0.0654254	0.33535	FALSE	5.21928e-09	1.06207	TRUE	0.953239	-0.0282281	FALSE	0.334042	-0.174644	FALSE
Chr_1	1229758	1231029	-	1272	NCAS_0A06210	0.193865	0.210463	FALSE	6.73141e-18	1.31201	TRUE	0.918967	0.0593763	FALSE	0.752455	0.0774111	FALSE
Chr_1	1231434	1231967	-	534	NCAS_0A06220	0.117256	0.217601	FALSE	0.000170625	0.516517	FALSE	0.81358	0.0956035	FALSE	0.597258	0.105663	FALSE
Chr_1	1232268	1232882	-	615	NCAS_0A06230	0.00223755	0.440782	FALSE	1.31435e-11	1.05957	TRUE	0.415865	0.238547	FALSE	0.189967	0.272358	FALSE
Chr_1	1233074	1234357	-	1284	NCAS_0A06240	0.913071	0.0617106	FALSE	7.562e-07	1.59544	TRUE	0.987252	0.00940343	FALSE	0.315989	-0.185127	FALSE
Chr_1	1234566	1238591	-	4026	NCAS_0A06250	0.914942	0.0297452	FALSE	1.04714e-13	1.16763	TRUE	0.611774	-0.145241	FALSE	0.00133612	-0.493888	FALSE
Chr_1	1239108	1239308	+	201	NCAS_0A06260	0.251949	0.197072	FALSE	2.89966e-05	0.665847	FALSE	0.532073	-0.178597	FALSE	0.00292607	-0.504164	FALSE
Chr_1	1239445	1241424	-	1980	NCAS_0A06270	0.169436	0.228693	FALSE	2.31822e-22	1.52858	TRUE	0.953239	0.0279746	FALSE	0.382003	-0.147939	FALSE
Chr_1	1241551	1241904	-	354	NCAS_0A06280	0.643251	-0.0821209	FALSE	1.16869e-08	1.03825	TRUE	0.987252	-0.029428	FALSE	0.0237901	1.4513	TRUE
Chr_1	1242025	1242852	+	828	NCAS_0A06290	0.00027336	0.552132	FALSE	1.63203e-18	1.46097	TRUE	0.167883	0.30395	FALSE	0.460721	0.152083	FALSE
Chr_1	1242929	1243444	-	516	NCAS_0A06300	0.62665	-0.0733114	FALSE	0.00110028	0.40979	FALSE	0.98977	0.0194482	FALSE	0.166408	0.672988	FALSE
Chr_1	1243683	1246823	-	3141	NCAS_0A06310	9.57466e-35	2.00166	TRUE	1.46921e-23	1.968	TRUE	1.00487e-40	1.98268	TRUE	1.95935e-32	1.77145	TRUE
Chr_1	1247794	1249575	+	1782	NCAS_0A06320	0.00109141	0.558837	FALSE	2.89407e-18	1.59991	TRUE	0.117736	0.34784	FALSE	0.824411	0.0544686	FALSE
Chr_1	1249819	1250916	+	1098	NCAS_0A06330	0.0115936	0.402682	FALSE	5.407e-29	1.81344	TRUE	0.805183	-0.103315	FALSE	0.164732	-0.268518	FALSE
Chr_1	1251368	1253647	+	2280	NCAS_0A06340	0.423686	0.201391	FALSE	2.59024e-06	1.03819	TRUE	0.855313	0.070511	FALSE	0.390939	-0.145518	FALSE
Chr_1	1253752	1254732	-	981	NCAS_0A06350	2.89413e-79	2.37098	TRUE	4.28988e-31	1.7925	TRUE	4.55354e-50	2.24088	TRUE	4.01538e-38	1.95392	TRUE
Chr_1	1255480	1256298	+	819	NCAS_0A06360	0.456128	0.140728	FALSE	3.78286e-05	0.667638	FALSE	0.969417	-0.0196962	FALSE	0.159927	-0.25149	FALSE
Chr_1	1256468	1257547	-	1080	NCAS_0A06370	0.183474	0.192412	FALSE	8.87014e-05	0.546191	FALSE	0.962457	-0.0245553	FALSE	0.674623	-0.0867941	FALSE
Chr_1	1257775	1258911	-	1137	NCAS_0A06380	0.0517634	0.357933	FALSE	2.00794e-17	1.56388	TRUE	0.645393	0.205395	FALSE	0.0291442	0.517998	FALSE
Chr_1	1259603	1260433	+	831	NCAS_0A06390	0.245779	0.216805	FALSE	1.61052e-18	1.44297	TRUE	0.937976	0.0557508	FALSE	0.678518	0.114766	FALSE
Chr_1	1260687	1262444	+	1758	NCAS_0A06400	0.00765153	0.405117	FALSE	1.72579e-51	2.37086	TRUE	0.20148	0.301981	FALSE	0.395735	0.178947	FALSE
Chr_1	1262740	1263833	-	1094	NCAS_0A06410	0.929731	-0.0185271	FALSE	1.16415e-06	0.645948	FALSE	0.928681	0.117411	FALSE	0.0593981	0.866394	FALSE
Chr_1	1264842	1267157	-	2316	NCAS_0A06420	3.9951e-06	0.749257	FALSE	1.09077e-18	1.6173	TRUE	0.00175631	0.490783	FALSE	0.477144	0.128203	FALSE
Chr_1	1267602	1269998	+	2397	NCAS_0A06430	2.1598e-24	1.22496	TRUE	1.92436e-22	1.41638	TRUE	2.45598e-11	1.13533	TRUE	8.74803e-12	1.1619	TRUE
Chr_1	1270771	1273020	+	2250	NCAS_0A06440	0.858865	0.0424711	FALSE	1.16508e-12	1.1145	TRUE	0.732998	-0.110551	FALSE	0.0411485	-0.317219	FALSE
Chr_1	1273459	1275288	+	1830	NCAS_0A06450	0.135525	0.244116	FALSE	3.49771e-28	1.74282	TRUE	0.941383	0.0403861	FALSE	0.0227043	0.417675	FALSE
Chr_1	1275444	1276970	-	1527	NCAS_0A06460	0.0769143	0.3358	FALSE	4.72413e-36	2.24912	TRUE	0.93699	0.0400803	FALSE	0.0900144	-0.294262	FALSE
Chr_1	1277189	1277902	+	714	NCAS_0A06470	0.0423296	0.295758	FALSE	4.92156e-16	1.21929	TRUE	0.80347	-0.0947306	FALSE	0.108701	-0.272591	FALSE
Chr_1	1278534	1279115	+	582	NCAS_0A06480	0.368199	0.414319	FALSE	0.000460382	1.44035	TRUE	0.135432	0.718147	FALSE	0.883127	0.0844987	FALSE
Chr_1	1279402	1281423	+	2022	NCAS_0A06490	0.0275303	0.380277	FALSE	2.29536e-44	2.41055	TRUE	0.794504	0.105499	FALSE	0.128257	-0.277618	FALSE
Chr_1	1283824	1285056	+	1233	NCAS_0A06510	0.294093	0.190634	FALSE	4.84495e-15	1.27878	TRUE	0.916901	0.0544054	FALSE	0.460501	-0.14892	FALSE
Chr_1	1285256	1286143	+	888	NCAS_0A06520	0.0541689	0.374266	FALSE	2.1804e-20	1.72074	TRUE	0.996593	-0.00330658	FALSE	0.2744	-0.219241	FALSE
Chr_1	1286318	1289836	-	3519	NCAS_0A06530	0.27492	0.179206	FALSE	8.59518e-42	2.06275	TRUE	0.8778	0.0729248	FALSE	0.479877	-0.143144	FALSE
Chr_1	1292273	1295014	+	2742	NCAS_0A06540	0.379876	0.15612	FALSE	2.72003e-11	1.06535	TRUE	0.83533	0.11015	FALSE	0.0146652	0.525946	FALSE
Chr_1	1296046	1298532	+	2487	NCAS_0A06550	0.362045	0.14569	FALSE	2.2599e-13	1.05043	TRUE	0.882225	-0.0719881	FALSE	0.54164	0.127842	FALSE
Chr_1	1298997	1299887	-	891	NCAS_0A06560	0.077312	0.375267	FALSE	2.64315e-13	1.52714	TRUE	0.481081	0.207892	FALSE	0.659878	0.0982348	FALSE
Chr_1	1300267	1302849	-	2583	NCAS_0A06570	0.860936	0.0463583	FALSE	1.89343e-06	0.850382	FALSE	0.717718	-0.120158	FALSE	0.00655327	-0.430436	FALSE
Chr_1	1303456	1305042	+	1587	NCAS_0A06580	0.966732	0.0214767	FALSE	4.0075e-11	1.51718	TRUE	0.674018	-0.165178	FALSE	0.780278	-0.0703931	FALSE
Chr_1	1305289	1306008	+	720	NCAS_0A06590	0.275111	0.280868	FALSE	0.0739223	0.430465	FALSE	0.481097	0.183764	FALSE	0.956862	0.012228	FALSE
Chr_1	1306287	1307930	+	1644	NCAS_0A06600	0.0248536	0.332643	FALSE	2.54147e-34	1.85801	TRUE	0.785577	0.116589	FALSE	0.744318	0.0744964	FALSE
Chr_1	1308287	1308763	+	477	NCAS_0A06610	0.0271726	0.278151	FALSE	1.84598e-23	1.32257	TRUE	0.973942	-0.0148145	FALSE	0.624204	-0.0926378	FALSE
Chr_1	1308935	1309369	-	435	NCAS_0A06620	0.82255	0.0534508	FALSE	0.00381773	0.439169	FALSE	0.968791	-0.0207043	FALSE	0.669679	-0.0899108	FALSE
Chr_1	1310215	1311372	+	1158	NCAS_0A06630	0.993042	-0.000464915	FALSE	5.3568e-06	1.01791	TRUE	0.912262	-0.0510476	FALSE	0.0608082	-0.310102	FALSE
Chr_1	1311768	1312580	+	813	NCAS_0A06640	2.88044e-07	1.73773	TRUE	1.67523e-08	2.08588	TRUE	8.64565e-24	2.11984	TRUE	1.86825e-10	1.42401	TRUE
Chr_1	1316398	1317378	+	981	NCAS_0A06660	0.638728	0.0875951	FALSE	9.33982e-06	0.660184	FALSE	0.288474	-0.232773	FALSE	0.662467	-0.0852106	FALSE
Chr_1	1317655	1319940	+	2286	NCAS_0A06670	0.257154	0.255494	FALSE	5.89125e-20	1.75046	TRUE	0.802916	-0.0947118	FALSE	0.947269	0.0158634	FALSE
Chr_1	1320265	1321704	+	1440	NCAS_0A06680	0.0924713	0.255993	FALSE	8.05831e-49	2.2169	TRUE	0.632352	-0.147767	FALSE	0.00106534	-0.532675	FALSE
Chr_1	1321931	1322818	+	888	NCAS_0A06690	0.000337802	0.466267	FALSE	1.21155e-18	1.27595	TRUE	0.476979	0.245505	FALSE	0.002901	0.634097	FALSE
Chr_1	1323039	1323641	+	603	NCAS_0A06700	0.984178	-0.00308043	FALSE	0.00604298	0.369976	FALSE	0.999463	0.00180911	FALSE	0.755277	0.0713808	FALSE
Chr_1	1324253	1326562	+	2310	NCAS_0A06710	0.273371	0.191426	FALSE	1.18868e-31	1.82305	TRUE	0.999826	-0.000486761	FALSE	0.0081018	-0.419338	FALSE
Chr_1	1326853	1329870	+	3018	NCAS_0A06720	0.71418	0.0724646	FALSE	3.09265e-07	0.778494	FALSE	0.738342	-0.111956	FALSE	0.0283141	-0.347502	FALSE
Chr_1	1330101	1330739	-	639	NCAS_0A06730	0.0248536	0.302194	FALSE	1.02335e-07	0.75759	FALSE	0.940058	-0.0419193	FALSE	0.181133	0.262021	FALSE
Chr_1	1331012	1332088	-	1077	NCAS_0A06740	0.0120628	0.316874	FALSE	1.34751e-23	1.35067	TRUE	0.689858	0.191536	FALSE	0.0144563	0.586104	FALSE
Chr_1	1332372	1333775	+	1404	NCAS_0A06750	0.000408298	0.452151	FALSE	2.10168e-24	1.44788	TRUE	0.594833	0.184752	FALSE	0.0830712	0.347938	FALSE
Chr_1	1333937	1339567	-	5631	NCAS_0A06760	0.528634	-0.148371	FALSE	1.30704e-14	1.58861	TRUE	0.686032	-0.119733	FALSE	3.7485e-05	-0.586029	FALSE
Chr_1	1340277	1341995	+	1719	NCAS_0A06770	1.37455e-10	0.991779	FALSE	4.03724e-20	1.65089	TRUE	1.78456e-06	0.73941	FALSE	0.0248246	0.374339	FALSE
Chr_1	1343570	1344751	+	1182	NCAS_0A06780	0.0204545	0.622362	FALSE	1.03187e-14	1.99329	TRUE	0.0576153	0.529855	FALSE	0.261949	0.311951	FALSE
Chr_1	1345180	1345990	+	811	NCAS_0A06790	0.65924	0.0799148	FALSE	3.52827e-10	0.906835	FALSE	0.991012	-0.00880074	FALSE	0.405374	0.212634	FALSE
Chr_1	1346677	1348098	+	1422	NCAS_0A06800	0.928925	0.037948	FALSE	1.12046e-27	1.95046	TRUE	0.954217	-0.0363227	FALSE	0.858812	0.049282	FALSE
Chr_1	1348229	1349614	-	1386	NCAS_0A06810	5.3885e-08	0.772709	FALSE	2.54325e-38	2.14143	TRUE	0.00135368	0.473623	FALSE	0.164139	0.218957	FALSE
Chr_1	1350166	1352661	+	2496	NCAS_0A06820	0.999485	0.00300447	FALSE	1.08979e-12	1.1207	TRUE	0.871619	-0.0668821	FALSE	0.0200152	-0.370815	FALSE
Chr_1	1352827	1353153	-	327	NCAS_0A06830	0.345839	0.172442	FALSE	4.58269e-13	1.17938	TRUE	0.862031	-0.0764728	FALSE	0.235879	-0.225611	FALSE
Chr_1	1353395	1354549	+	1155	NCAS_0A06840	0.788747	0.0895166	FALSE	4.46162e-09	1.32022	TRUE	0.922859	0.048475	FALSE	0.568936	-0.11277	FALSE
Chr_1	1354743	1356986	-	2244	NCAS_0A06850	0.839523	0.0594349	FALSE	2.50154e-11	1.24289	TRUE	0.850147	-0.0799227	FALSE	0.129914	-0.267588	FALSE
Chr_1	1357407	1363346	+	5940	NCAS_0A06860	0.939025	-0.018699	FALSE	1.75735e-10	1.09166	TRUE	0.755339	-0.107221	FALSE	0.00204019	-0.474303	FALSE
Chr_1	1363746	1363946	+	201	NCAS_0A06870	0.00210847	0.429287	FALSE	1.10252e-15	1.21489	TRUE	0.867329	0.0788466	FALSE	0.167359	-0.269448	FALSE
Chr_1	1364279	1364593	-	315	NCAS_0A06880	0.383554	0.154835	FALSE	0.00346553	0.48638	FALSE	0.962457	-0.0262686	FALSE	0.716481	-0.0817805	FALSE
Chr_1	1367939	1368976	+	1038	NCAS_0A06890	0.761706	0.085626	FALSE	0.312944	0.212895	FALSE	0.740558	-0.141137	FALSE	0.503925	-0.152374	FALSE
Chr_1	1369166	1370302	+	1137	NCAS_0A06900	0.488908	0.19321	FALSE	1.73987e-19	1.79105	TRUE	0.891015	0.0765109	FALSE	0.662778	-0.106724	FALSE
Chr_1	1370528	1372735	+	2208	NCAS_0A06910	0.660947	0.0889966	FALSE	1.60983e-07	0.841392	FALSE	0.960979	-0.0300527	FALSE	0.629709	0.11271	FALSE
Chr_1	1373157	1374713	+	1557	NCAS_0A06920	1.51593e-10	0.891398	FALSE	1.49485e-26	1.74749	TRUE	4.11044e-05	0.672353	FALSE	2.60728e-05	0.685601	FALSE
Chr_1	1375288	1376766	+	1479	NCAS_0A06930	0.969813	-0.00802874	FALSE	4.51868e-26	1.56125	TRUE	0.530596	-0.177615	FALSE	0.933982	-0.0184277	FALSE
Chr_1	1376998	1377462	+	465	NCAS_0A06940	0.240812	0.277966	FALSE	2.12923e-07	1.09698	TRUE	0.848048	-0.106697	FALSE	0.907525	0.0377751	FALSE
Chr_1	1378000	1378806	-	807	NCAS_0A06950	2.66409e-31	1.9346	TRUE	3.37266e-12	1.40546	TRUE	1.1003e-28	1.81258	TRUE	4.77188e-30	1.86324	TRUE
Chr_1	1379167	1379955	-	789	NCAS_0A06960	9.78687e-12	2.74905	TRUE	3.27886e-28	4.54837	TRUE	2.94793e-11	2.27145	TRUE	3.10724e-07	1.83993	TRUE
Chr_1	1381564	1382328	+	765	NCAS_0A06970	0.288433	0.164173	FALSE	1.45458e-18	1.24798	TRUE	0.666489	-0.139972	FALSE	0.158803	-0.248992	FALSE
Chr_1	1382548	1384278	+	1731	NCAS_0A06980	2.44656e-06	0.657632	FALSE	2.85802e-17	1.34995	TRUE	0.0925546	0.321793	FALSE	0.885798	-0.0300436	FALSE
Chr_1	1384478	1387858	-	3381	NCAS_0A06990	0.642353	0.111256	FALSE	4.64959e-23	1.789	TRUE	0.697269	0.131642	FALSE	0.479061	-0.134454	FALSE
Chr_1	1389301	1390503	+	1203	NCAS_0A07000	2.9344e-11	1.2083	TRUE	8.64547e-19	1.85826	TRUE	1.631e-11	1.10217	TRUE	5.73759e-05	0.694613	FALSE
Chr_1	1390766	1391179	+	414	NCAS_0A07010	2.678e-05	0.626765	FALSE	8.59682e-05	0.672946	FALSE	0.0323486	0.517609	FALSE	0.00726149	0.596911	FALSE
Chr_1	1391503	1392711	+	1209	NCAS_0A07020	0.000297551	0.61956	FALSE	3.54172e-15	1.4691	TRUE	0.149062	0.295095	FALSE	0.821343	-0.0474914	FALSE
Chr_1	1392882	1393529	-	648	NCAS_0A07030	0.699383	0.0822343	FALSE	1.29259e-05	0.691768	FALSE	0.930542	-0.05113	FALSE	0.407175	-0.185012	FALSE
Chr_1	1393736	1395271	-	1536	NCAS_0A07040	0.0666666	0.333932	FALSE	2.55689e-29	1.88472	TRUE	0.988296	-0.00779537	FALSE	0.344198	-0.186499	FALSE
Chr_1	1395437	1396480	-	1044	NCAS_0A07050	0.523057	0.107874	FALSE	4.99079e-21	1.37851	TRUE	0.680812	0.370748	FALSE	0.0244365	1.0302	TRUE
Chr_1	1396705	1398585	+	1881	NCAS_0A07060	0.437731	0.149856	FALSE	1.85658e-32	1.87791	TRUE	0.940591	-0.041119	FALSE	0.904105	-0.0280619	FALSE
Chr_1	1398823	1400442	+	1620	NCAS_0A07070	0.82554	-0.0438265	FALSE	1.59779e-07	0.758759	FALSE	0.984674	0.012778	FALSE	0.27451	0.235525	FALSE
Chr_1	1400590	1403607	-	3018	NCAS_0A07080	0.993479	0.0126213	FALSE	1.56476e-13	1.35631	TRUE	0.958872	-0.0263529	FALSE	0.00054773	-0.560881	FALSE
Chr_1	1404058	1405164	+	1107	NCAS_0A07090	0.779333	-0.0536253	FALSE	5.76293e-18	1.35226	TRUE	0.462482	-0.208242	FALSE	0.780464	-0.0628842	FALSE
Chr_1	1405428	1406723	-	1296	NCAS_0A07100	0.36231	0.194076	FALSE	3.95211e-20	1.76151	TRUE	0.836762	0.125501	FALSE	0.0701946	0.459212	FALSE
Chr_1	1408106	1409884	+	1779	NCAS_0A07110	0.118297	0.286896	FALSE	2.92125e-14	1.3659	TRUE	0.468923	0.248703	FALSE	0.00314829	0.63135	FALSE
Chr_1	1410102	1410791	+	690	NCAS_0A07120	7.48231e-07	1.08761	TRUE	5.54095e-09	1.44488	TRUE	4.62847e-05	1.03327	TRUE	2.78998e-09	1.45457	TRUE
Chr_1	1415298	1416206	+	909	NCAS_0A07130	0.704364	0.0805114	FALSE	8.01231e-07	0.791456	FALSE	0.885805	-0.0625039	FALSE	0.0203369	-0.375468	FALSE
Chr_1	1416428	1417426	-	999	NCAS_0A07140	0.825798	0.048418	FALSE	0.000288634	0.570489	FALSE	0.868935	0.272892	FALSE	0.00108304	2.04059	TRUE
Chr_1	1417929	1419191	-	1263	NCAS_0A07150	0.82753	0.0558364	FALSE	2.39364e-23	1.62547	TRUE	0.981431	0.0168498	FALSE	0.345588	0.223178	FALSE
Chr_1	1419393	1420385	-	993	NCAS_0A07160	0.0289891	0.419864	FALSE	1.32786e-13	1.4097	TRUE	0.715605	0.149606	FALSE	0.942195	-0.015803	FALSE
Chr_1	1420589	1422334	-	1746	NCAS_0A07170	0.0202151	0.375355	FALSE	7.9728e-12	1.16794	TRUE	0.107879	0.314369	FALSE	0.380109	0.163904	FALSE
Chr_1	1422553	1424928	-	2376	NCAS_0A07180	0.992613	0.00485606	FALSE	1.17551e-12	1.27466	TRUE	0.860751	-0.0814971	FALSE	0.626677	-0.106057	FALSE
Chr_1	1425482	1427107	-	1626	NCAS_0A07190	7.97327e-10	1.13483	TRUE	2.09863e-17	1.80702	TRUE	1.99773e-05	0.75973	FALSE	0.000857962	0.614219	FALSE
Chr_1	1427707	1430169	+	2463	NCAS_0A07200	0.000246504	0.499403	FALSE	8.25988e-28	1.66447	TRUE	0.225956	0.232225	FALSE	0.0531778	-0.294287	FALSE
Chr_1	1430223	1431260	-	1038	NCAS_0A07210	0.69065	-0.312189	FALSE	6.87439e-09	3.94203	TRUE	0.749399	0.770607	FALSE	0.0950269	2.12712	FALSE
Chr_1	1431682	1433271	-	1590	NCAS_0A07220	4.06401e-06	0.658841	FALSE	4.56679e-31	1.86095	TRUE	0.0537316	0.404146	FALSE	0.00175004	0.579943	FALSE
Chr_1	1435005	1435931	-	927	NCAS_0A07230	3.46669e-05	2.06231	TRUE	8.5841e-14	3.64077	TRUE	0.000336419	2.33707	TRUE	0.00760383	1.78163	TRUE
Chr_1	1437114	1438478	+	1365	NCAS_0A07240	0.00176707	0.472102	FALSE	5.27151e-17	1.37188	TRUE	0.182177	0.292545	FALSE	0.654662	0.0957393	FALSE
Chr_1	1438772	1439611	-	840	NCAS_0A07250	0.434464	0.208964	FALSE	8.74473e-14	1.55515	TRUE	0.862632	0.0850391	FALSE	0.0958425	0.328335	FALSE
Chr_1	1440606	1442864	+	2259	NCAS_0A07260	0.00368376	0.396363	FALSE	9.17835e-30	1.67386	TRUE	0.788667	0.102072	FALSE	0.818869	-0.0474503	FALSE
Chr_1	1442956	1445355	-	2400	NCAS_0A07270	0.232474	0.194766	FALSE	1.98382e-22	1.48443	TRUE	0.84827	0.0914041	FALSE	0.133132	0.298282	FALSE
Chr_1	1445769	1446218	+	450	NCAS_0A07280	0.000242328	0.571302	FALSE	6.11014e-14	1.28366	TRUE	0.411942	0.886323	FALSE	2.01209e-05	2.91624	TRUE
Chr_1	1446441	1449287	+	2847	NCAS_0A07290	0.923615	-0.0593624	FALSE	0.000227518	1.42905	TRUE	0.915742	0.0743475	FALSE	0.000637892	0.798986	FALSE
Chr_1	1449494	1450363	+	870	NCAS_0A07300	0.428517	0.228564	FALSE	5.8582e-12	1.54455	TRUE	0.969493	-0.019483	FALSE	0.192647	-0.265392	FALSE
Chr_1	1450943	1452976	-	2034	NCAS_0A07310	1.88457e-74	2.96847	TRUE	1.60293e-27	2.14877	TRUE	2.24782e-32	2.73434	TRUE	4.23464e-48	3.35187	TRUE
Chr_1	1454527	1454943	+	417	NCAS_0A07320	2.02751e-14	1.15138	TRUE	1.23785e-13	1.32351	TRUE	9.42731e-07	0.774442	FALSE	0.00289021	0.495821	FALSE
Chr_1	1455030	1455818	-	789	NCAS_0A07330	0.994623	0.00101695	FALSE	0.000695267	1.09511	TRUE	0.922134	0.0694713	FALSE	0.000412753	0.822641	FALSE
Chr_1	1456565	1457512	+	948	NCAS_0A07340	0.6454	0.1019	FALSE	1.33539e-16	1.49558	TRUE	0.88367	0.0977958	FALSE	0.0222416	0.565719	FALSE
Chr_1	1457622	1458065	-	444	NCAS_0A07350	0.656582	-0.0848238	FALSE	0.00474151	0.432314	FALSE	0.986292	0.0316673	FALSE	0.000175283	1.92624	TRUE
Chr_1	1458229	1459479	-	1251	NCAS_0A07360	0.303371	0.15959	FALSE	7.86172e-15	1.09668	TRUE	0.435793	0.25888	FALSE	2.89518e-05	0.863926	FALSE
Chr_1	1459906	1461180	+	1275	NCAS_0A07370	0.418787	0.16272	FALSE	4.98426e-28	1.80912	TRUE	0.94297	0.0519426	FALSE	0.0691059	0.447783	FALSE
Chr_1	1461415	1462890	+	1476	NCAS_0A07380	0.742527	0.0786133	FALSE	2.35665e-05	0.749408	FALSE	0.851748	-0.0761217	FALSE	0.103119	-0.275014	FALSE
Chr_1	1463090	1464526	+	1437	NCAS_0A07390	1.12242e-11	0.968109	FALSE	1.06003e-30	1.90939	TRUE	2.42285e-05	0.670232	FALSE	0.0785196	0.304037	FALSE
Chr_1	1464655	1465677	-	1023	NCAS_0A07400	1.77333e-06	0.565407	FALSE	8.64658e-69	2.38573	TRUE	0.908246	0.0577965	FALSE	0.337069	0.182832	FALSE
Chr_1	1467139	1468295	+	1157	NCAS_0A07410	0.942633	0.0173524	FALSE	0.000187387	0.566224	FALSE	0.969493	0.0289411	FALSE	0.00829491	0.663244	FALSE
Chr_1	1468586	1468906	+	321	NCAS_0A07420	0.40069	0.194888	FALSE	3.20991e-11	1.27183	TRUE	0.966322	-0.0232925	FALSE	0.863222	-0.0423949	FALSE
Chr_1	1469073	1470905	-	1833	NCAS_0A07430	0.00129351	0.480849	FALSE	2.45704e-38	2.09624	TRUE	0.623921	0.13794	FALSE	0.0832485	-0.273162	FALSE
Chr_1	1471149	1477172	+	6024	NCAS_0A07440	0.176154	0.226299	FALSE	5.69607e-25	1.64819	TRUE	0.981186	-0.0112242	FALSE	0.289595	-0.182376	FALSE
Chr_1	1477489	1480743	+	3255	NCAS_0A07450	0.401756	0.149586	FALSE	4.7534e-13	1.13972	TRUE	0.979784	-0.0119263	FALSE	0.0587717	-0.306115	FALSE
Chr_1	1481059	1481868	-	810	NCAS_0A07460	0.19165	0.239754	FALSE	1.19462e-16	1.41658	TRUE	0.99225	0.00765545	FALSE	0.312858	-0.214291	FALSE
Chr_1	1482301	1484322	-	2022	NCAS_0A07470	0.967533	0.0148687	FALSE	8.64434e-12	1.23644	TRUE	0.980815	0.0123301	FALSE	0.179843	-0.236103	FALSE
Chr_1	1484806	1487409	+	2604	NCAS_0A07480	0.122943	0.310213	FALSE	2.65003e-25	1.94637	TRUE	0.865184	0.0923322	FALSE	0.985912	-0.00336097	FALSE
Chr_1	1488151	1490121	-	1971	NCAS_0A07490	0.613167	-0.151468	FALSE	8.09367e-05	0.87627	FALSE	0.954683	0.116045	FALSE	0.000947851	2.05195	TRUE
Chr_1	1490789	1493320	-	2532	NCAS_0A07500	0.00253265	0.520474	FALSE	1.1734e-13	1.37673	TRUE	0.00930956	0.463248	FALSE	0.768498	-0.0624099	FALSE
Chr_1	1493599	1493976	-	378	NCAS_0A07510	0.0918241	0.385335	FALSE	3.70584e-09	1.39811	TRUE	0.932334	-0.0565389	FALSE	0.481469	-0.195673	FALSE
Chr_1	1494178	1494567	+	390	NCAS_0A07520	0.739234	-0.0750633	FALSE	0.0100859	0.500566	FALSE	0.762158	-0.129857	FALSE	0.36761	-0.194019	FALSE
Chr_1	1494636	1495166	-	531	NCAS_0A07530	0.553481	-0.238785	FALSE	0.0132796	0.839649	FALSE	0.00530498	-0.409493	FALSE	0.0715059	-0.268572	FALSE
Chr_1	1495424	1497739	-	2316	NCAS_0A07540	0.188131	0.24128	FALSE	3.76034e-26	1.79285	TRUE	0.972663	-0.0160863	FALSE	0.0022029	-0.481598	FALSE
Chr_1	1498082	1499359	+	1278	NCAS_0A07550	0.612765	0.109767	FALSE	1.87768e-10	1.08907	TRUE	0.953239	-0.0299191	FALSE	0.0870945	-0.298148	FALSE
Chr_1	1499783	1502356	+	2574	NCAS_0A07560	0.297831	0.199044	FALSE	5.93222e-25	1.76534	TRUE	0.773284	-0.106894	FALSE	0.0171248	-0.394608	FALSE
Chr_1	1502593	1504212	-	1620	NCAS_0A07570	0.361874	0.149937	FALSE	2.25716e-27	1.60711	TRUE	0.121807	-0.325539	FALSE	0.000463341	-0.603659	FALSE
Chr_1	1507060	1507893	-	834	NCAS_0A07580	0.046349	0.311599	FALSE	2.12842e-21	1.45761	TRUE	0.934079	-0.0454631	FALSE	0.915169	-0.0256567	FALSE
Chr_1	1508509	1510014	+	1506	NCAS_0A07590	0.930005	0.0179782	FALSE	7.94557e-05	0.51151	FALSE	0.953239	0.0768382	FALSE	0.0312733	0.893631	FALSE
Chr_1	1510813	1512783	+	1971	NCAS_0A07600	0.969141	-0.0213676	FALSE	9.67184e-05	0.820976	FALSE	0.915845	0.219158	FALSE	0.010115	1.81181	TRUE
Chr_1	1512914	1515982	-	3069	NCAS_0A07610	7.24924e-05	0.565202	FALSE	1.78849e-39	2.08918	TRUE	0.0928294	0.302452	FALSE	0.814416	0.0467466	FALSE
Chr_1	1516323	1518689	-	2367	NCAS_0A07620	0.542547	0.108321	FALSE	3.91803e-14	1.11571	TRUE	0.787443	-0.116398	FALSE	0.745189	-0.0747665	FALSE
Chr_1	1519397	1521541	+	2145	NCAS_0A07630	0.961775	-0.0286501	FALSE	1.04878e-32	3.82969	TRUE	0.963918	-0.0271596	FALSE	0.0906689	0.354782	FALSE
Chr_1	1521774	1524515	-	2742	NCAS_0A07640	0.950545	-0.0101234	FALSE	6.00856e-11	1.25661	TRUE	0.973942	-0.0135727	FALSE	0.018062	-0.355075	FALSE
Chr_1	1524981	1525589	-	609	NCAS_0A07650	0.712938	0.130348	FALSE	2.14749e-09	1.43954	TRUE	0.672971	0.209019	FALSE	0.018157	0.594643	FALSE
Chr_1	1525755	1526915	-	1161	NCAS_0A07660	0.273312	0.388964	FALSE	3.60834e-10	2.08962	TRUE	0.833506	-0.140201	FALSE	0.0005002	0.957933	FALSE
Chr_1	1527273	1528592	-	1320	NCAS_0A07670	0.0088081	0.47652	FALSE	4.29046e-10	1.26685	TRUE	0.93209	-0.0551277	FALSE	0.420134	0.21422	FALSE
Chr_1	1529068	1530450	-	1383	NCAS_0A07680	0.773321	0.0537352	FALSE	1.95811e-06	0.65115	FALSE	0.954209	0.0426188	FALSE	0.101284	0.409896	FALSE
Chr_1	1530789	1532306	-	1518	NCAS_0A07690	0.000562638	0.5855	FALSE	9.92111e-21	1.70237	TRUE	0.135658	0.420796	FALSE	0.00388397	0.668375	FALSE
Chr_1	1533242	1533625	-	384	NCAS_0A07700	3.1882e-79	3.0199	TRUE	3.61681e-25	2.02605	TRUE	1.39642e-92	2.90378	TRUE	1.5983e-72	2.5849	TRUE
Chr_1	1533902	1534597	+	696	NCAS_0A07710	0.401197	-0.214006	FALSE	0.000646218	0.806828	FALSE	0.342516	-0.203534	FALSE	2.38939e-05	-0.615043	FALSE
Chr_1	1534745	1536114	-	1370	NCAS_0A07720	0.570902	-0.0949932	FALSE	0.000129762	0.543763	FALSE	0.48408	-0.187387	FALSE	0.0379555	-0.353673	FALSE
Chr_1	1536668	1539646	-	2979	NCAS_0A07730	2.04987e-35	-10.6026	FALSE	2.26625e-13	1.18084	TRUE	0.00411934	0.468325	FALSE	0.0899294	0.283089	FALSE
Chr_1	1540045	1541163	-	1119	NCAS_0A07740	0.128067	0.315087	FALSE	2.74389e-09	1.25296	TRUE	0.13375	-0.535819	FALSE	0.213574	-0.401934	FALSE
Chr_1	1542747	1543427	-	681	NCAS_0A07750	0.0276328	0.279954	FALSE	6.41722e-64	2.24205	TRUE	0.415285	0.305886	FALSE	0.0189837	0.586811	FALSE
Chr_1	1544068	1544736	-	669	NCAS_0A07760	0.000126788	1.3552	TRUE	1.35313e-21	3.25112	TRUE	7.37126e-06	1.45721	TRUE	7.16699e-10	1.95717	TRUE
Chr_1	1546071	1547810	+	1740	NCAS_0A07770	0.613167	0.0918768	FALSE	4.07104e-26	1.58946	TRUE	0.885134	-0.0646059	FALSE	0.435844	-0.146057	FALSE
Chr_1	1548197	1549318	+	1122	NCAS_0A07780	0.788618	-0.0714338	FALSE	3.26813e-13	1.39489	TRUE	0.954314	-0.0440094	FALSE	0.0123405	0.634194	FALSE
Chr_1	1549703	1552312	+	2610	NCAS_0A07790	0.933663	-0.0207028	FALSE	1.90556e-13	1.39414	TRUE	0.729309	-0.145975	FALSE	0.223523	-0.265843	FALSE
Chr_1	1553599	1554486	+	888	NCAS_0A07800	0.00568054	0.547304	FALSE	8.20604e-23	1.99811	TRUE	0.585774	0.20219	FALSE	0.471746	0.17508	FALSE
Chr_1	1554541	1556247	-	1707	NCAS_0A07810	0.132762	0.25954	FALSE	9.63172e-36	2.03055	TRUE	0.953239	0.029325	FALSE	0.853674	-0.0358137	FALSE
Chr_1	1556553	1558928	-	2376	NCAS_0A07820	0.755058	-0.065933	FALSE	3.69994e-13	1.37197	TRUE	0.999463	-0.000696715	FALSE	0.0971828	-0.309969	FALSE
Chr_1	1559291	1559980	+	690	NCAS_0A07830	0.0571953	0.264151	FALSE	5.78532e-05	0.579111	FALSE	0.793797	0.110321	FALSE	0.294556	0.207325	FALSE
Chr_1	1560033	1561544	-	1512	NCAS_0A07840	0.920876	-0.019826	FALSE	9.63242e-13	1.25177	TRUE	0.915742	-0.0504104	FALSE	0.211433	-0.220439	FALSE
Chr_1	1561758	1563596	-	1839	NCAS_0A07850	0.129445	0.223515	FALSE	1.86972e-16	1.18532	TRUE	0.781264	0.127103	FALSE	0.187016	0.280388	FALSE
Chr_1	1563830	1565362	+	1533	NCAS_0A07860	0.968404	0.0173976	FALSE	3.27214e-11	1.53117	TRUE	0.77059	-0.115706	FALSE	0.625514	-0.102839	FALSE
Chr_1	1565554	1566969	+	1416	NCAS_0A07870	1.39436e-16	1.25938	TRUE	3.40962e-33	2.10778	TRUE	1.0514e-08	0.933262	FALSE	0.000106278	0.659374	FALSE
Chr_1	1567077	1568219	-	1143	NCAS_0A07880	6.82426e-20	1.41714	TRUE	1.11739e-15	1.48369	TRUE	7.89273e-21	1.39454	TRUE	5.93867e-12	1.05067	TRUE
Chr_1	1568369	1569985	-	1617	NCAS_0A07890	0.00318483	0.456993	FALSE	2.70621e-32	1.90496	TRUE	0.924734	0.0468803	FALSE	0.538002	-0.117741	FALSE
Chr_1	1570244	1571347	-	1104	NCAS_0A07900	0.0738425	0.361881	FALSE	7.82506e-21	1.84358	TRUE	0.813097	0.0976908	FALSE	0.444293	-0.14778	FALSE
Chr_1	1571571	1572083	-	513	NCAS_0A07910	0.0496861	0.405597	FALSE	1.00943e-08	1.14868	TRUE	0.289042	0.397182	FALSE	6.60354e-06	1.16992	TRUE
Chr_1	1572293	1572694	+	402	NCAS_0A07920	0.914942	0.180981	FALSE	0.000202369	3.19949	TRUE	0.917152	0.3083	FALSE	0.28344	1.47438	FALSE
Chr_1	1572820	1573803	-	984	NCAS_0A07930	0.569917	0.129303	FALSE	2.72843e-26	1.79278	TRUE	0.752662	-0.132284	FALSE	0.000100324	-0.721253	FALSE
Chr_1	1573937	1574740	-	804	NCAS_0A07940	2.22493e-07	0.874848	FALSE	5.17976e-21	1.81694	TRUE	0.022195	0.588419	FALSE	0.00246773	0.720553	FALSE
Chr_1	1574967	1575377	-	411	NCAS_0A07950	0.394259	-0.21387	FALSE	2.19924e-07	1.17585	TRUE	0.907522	-0.0666314	FALSE	0.404221	0.186868	FALSE
Chr_1	1575696	1577189	+	1494	NCAS_0A07960	0.832624	0.0500608	FALSE	2.82354e-19	1.54113	TRUE	0.675628	-0.144906	FALSE	0.000917492	-0.573016	FALSE
Chr_1	1577266	1577562	-	297	NCAS_0A07970	1.68147e-18	1.71613	TRUE	3.77872e-08	1.29111	TRUE	5.01514e-23	1.51731	TRUE	1.94686e-14	1.19987	TRUE
Chr_1	1577723	1578382	+	660	NCAS_0A07980	0.000180852	0.640081	FALSE	4.07886e-14	1.42431	TRUE	0.0033982	0.489582	FALSE	0.603222	0.102875	FALSE
Chr_1	1578473	1581346	-	2874	NCAS_0A07990	0.000295028	0.605001	FALSE	8.0724e-11	1.21086	TRUE	0.867563	0.0792912	FALSE	0.983622	0.00537635	FALSE
Chr_1	1582334	1584016	+	1683	NCAS_0A08000	0.950667	-0.014598	FALSE	1.35852e-11	1.25813	TRUE	0.963918	0.0306437	FALSE	0.0186637	0.515977	FALSE
Chr_1	1584228	1584662	+	435	NCAS_0A08010	0.00104696	1.2291	TRUE	0.000893649	1.42742	TRUE	0.111746	0.95308	FALSE	4.26963e-16	3.54381	TRUE
Chr_1	1585065	1585781	+	717	NCAS_0A08020	0.122739	0.369231	FALSE	3.71099e-15	1.78274	TRUE	0.0691911	0.403285	FALSE	0.0573181	0.383547	FALSE
Chr_1	1586013	1586612	+	600	NCAS_0A08030	0.993622	0.000106235	FALSE	4.75717e-06	0.736653	FALSE	0.94297	-0.0402911	FALSE	0.0321101	0.425061	FALSE
Chr_1	1586844	1589222	+	2379	NCAS_0A08040	0.245741	0.210032	FALSE	7.24118e-14	1.24889	TRUE	0.398988	0.207223	FALSE	0.520812	-0.122012	FALSE
Chr_1	1589715	1591214	+	1500	NCAS_0A08050	0.055557	0.349989	FALSE	6.05798e-21	1.71901	TRUE	0.30303	0.236804	FALSE	0.409651	0.155561	FALSE
Chr_1	1591470	1593248	+	1779	NCAS_0A08060	0.304399	0.186284	FALSE	4.3506e-22	1.54865	TRUE	0.850147	-0.0811766	FALSE	0.152755	-0.258407	FALSE
Chr_1	1593382	1593954	-	573	NCAS_0A08070	0.000407591	0.659716	FALSE	2.35975e-26	2.07001	TRUE	0.0453107	0.378827	FALSE	0.959532	0.0143833	FALSE
Chr_1	1594221	1596092	-	1872	NCAS_0A08080	0.774653	0.0589577	FALSE	7.20284e-33	1.76127	TRUE	0.477704	-0.174134	FALSE	0.030169	-0.339241	FALSE
Chr_1	1598251	1598919	+	669	NCAS_0A08090	0.320694	-0.169908	FALSE	7.55761e-23	1.59686	TRUE	0.180534	-0.309091	FALSE	0.363441	-0.187511	FALSE
Chr_1	1599136	1601460	+	2325	NCAS_0A08100	0.48257	0.142897	FALSE	3.04248e-17	1.43445	TRUE	0.912304	-0.0528213	FALSE	0.309143	-0.188247	FALSE
Chr_1	1601614	1603056	+	1443	NCAS_0A08110	0.801589	0.11386	FALSE	6.78149e-25	2.12469	TRUE	0.940591	0.036607	FALSE	0.00329645	-0.467958	FALSE
Chr_1	1603158	1603796	-	639	NCAS_0A08120	0.888646	0.035033	FALSE	1.30201e-08	0.851439	FALSE	0.920811	-0.0580928	FALSE	0.797311	0.0652601	FALSE
Chr_1	1604190	1608143	+	3954	NCAS_0A08130	0.997682	0.00806723	FALSE	2.04783e-06	1.02786	TRUE	0.466318	-0.181608	FALSE	0.0128983	-0.396573	FALSE
Chr_1	1608470	1609705	-	1236	NCAS_0A08140	0.36143	0.230321	FALSE	2.51974e-08	1.23508	TRUE	0.805183	0.0941794	FALSE	0.240084	-0.204881	FALSE
Chr_1	1610145	1611470	+	1326	NCAS_0A08150	0.168072	0.256456	FALSE	2.61579e-15	1.41115	TRUE	0.746702	0.104517	FALSE	0.383259	-0.144395	FALSE
Chr_1	1611611	1613677	-	2067	NCAS_0A08160	0.512953	0.123441	FALSE	3.16202e-38	1.99085	TRUE	0.607727	-0.146644	FALSE	0.000901949	-0.512679	FALSE
Chr_1	1613915	1614868	+	954	NCAS_0A08170	5.20111e-14	1.04678	TRUE	1.77272e-25	1.67953	TRUE	6.80672e-06	0.959979	FALSE	1.08804e-06	1.03414	TRUE
Chr_1	1614987	1616111	+	1125	NCAS_0A08180	1.41224e-15	1.46521	TRUE	7.06762e-18	1.82964	TRUE	1.24589e-13	1.18244	TRUE	5.50144e-08	0.898542	FALSE
Chr_1	1616379	1617641	-	1263	NCAS_0A08190	0.698087	0.109135	FALSE	1.39133e-19	1.75234	TRUE	0.963918	0.0282016	FALSE	0.212559	-0.267547	FALSE
Chr_1	1617910	1619820	-	1911	NCAS_0A08200	0.873252	-0.046161	FALSE	6.34488e-07	0.97363	FALSE	0.294455	-0.253051	FALSE	0.244066	-0.222673	FALSE
Chr_1	1620689	1621615	+	927	NCAS_0A08210	1.03584e-72	2.388	TRUE	1.05565e-25	1.70401	TRUE	4.48571e-50	2.42711	TRUE	2.13892e-48	2.39199	TRUE
Chr_1	1622059	1623057	+	999	NCAS_0A08220	0.226439	0.255271	FALSE	2.42527e-16	1.57311	TRUE	0.96689	0.0238137	FALSE	0.105931	-0.303907	FALSE
Chr_1	1623138	1625771	-	2634	NCAS_0A08230	0.553986	0.109058	FALSE	1.09678e-22	1.48314	TRUE	0.92752	-0.0452839	FALSE	0.0356712	-0.360664	FALSE
Chr_1	1626279	1628951	+	2673	NCAS_0A08240	0.166835	0.265359	FALSE	1.53613e-27	1.91648	TRUE	0.849458	0.0786536	FALSE	0.0859493	-0.291197	FALSE
Chr_1	1630317	1630736	-	420	NCAS_0A08250	5.95277e-05	0.536402	FALSE	1.24437e-16	1.23871	TRUE	0.661079	0.142173	FALSE	0.781054	-0.0574587	FALSE
Chr_1	1631053	1633017	-	1965	NCAS_0A08260	0.282668	0.148059	FALSE	0.00238645	0.391261	FALSE	0.814538	0.111456	FALSE	0.152328	0.299127	FALSE
Chr_1	1633374	1635182	+	1809	NCAS_0A08270	0.000127767	0.595841	FALSE	6.51775e-32	2.02999	TRUE	0.0598587	0.349106	FALSE	0.714287	-0.0736871	FALSE
Chr_1	1636423	1636779	+	357	NCAS_0A08280	4.39868e-15	1.20362	TRUE	1.47582e-05	0.810066	FALSE	2.94551e-08	0.916554	FALSE	0.00109198	0.573266	FALSE
Chr_1	1636967	1640080	-	3114	NCAS_0A08290	0.928432	0.0257063	FALSE	1.36065e-20	1.45327	TRUE	0.959891	-0.0295543	FALSE	0.894532	-0.032348	FALSE
Chr_1	1640373	1641341	+	969	NCAS_0A08300	0.616565	-0.12684	FALSE	0.00221995	1.14572	TRUE	0.971164	0.0336659	FALSE	0.930398	-0.0277838	FALSE
Chr_1	1641487	1642761	+	1275	NCAS_0A08310	0.0735373	-0.450976	FALSE	0.00517668	0.774059	FALSE	0.867018	-0.0877253	FALSE	0.892133	-0.0371922	FALSE
Chr_1	1643021	1643503	+	483	NCAS_0A08320	0.571676	0.0788584	FALSE	1.15586e-08	0.66162	FALSE	0.960663	-0.0330994	FALSE	0.0135616	0.523421	FALSE
Chr_1	1643908	1647405	+	3498	NCAS_0A08330	0.575035	0.12057	FALSE	5.87139e-22	1.67818	TRUE	0.538686	-0.156788	FALSE	9.30983e-05	-0.570591	FALSE
Chr_1	1647483	1649831	-	2349	NCAS_0A08340	0.931953	-0.0184141	FALSE	1.94599e-23	1.52202	TRUE	0.444136	-0.19097	FALSE	0.00263285	-0.479482	FALSE
Chr_1	1650288	1650668	+	381	NCAS_0A08350	0.875578	-0.0498273	FALSE	0.000822446	0.73502	FALSE	0.941179	-0.0460835	FALSE	0.503925	0.163594	FALSE
Chr_1	1650814	1654134	-	3321	NCAS_0A08360	1.07562e-19	1.24108	TRUE	1.09678e-22	1.60882	TRUE	6.62435e-14	1.0769	TRUE	8.09089e-07	0.733342	FALSE
Chr_1	1654408	1656936	+	2529	NCAS_0A08370	4.58744e-11	0.970947	FALSE	1.19323e-31	1.99473	TRUE	2.04716e-08	0.870537	FALSE	0.000429445	0.574716	FALSE
Chr_1	1657054	1660293	-	3240	NCAS_0A08380	0.832811	0.0654212	FALSE	5.56901e-20	1.67588	TRUE	0.999463	0.00195717	FALSE	0.0116752	-0.399242	FALSE
Chr_1	1660654	1661259	-	606	NCAS_0A08390	0.0106422	0.508996	FALSE	3.92107e-19	1.73208	TRUE	0.849723	0.114307	FALSE	0.72739	0.102112	FALSE
Chr_1	1662229	1662555	-	327	NCAS_0A08400	0.00687784	0.499936	FALSE	5.25174e-07	0.979046	FALSE	0.208495	0.257918	FALSE	0.90962	0.0248054	FALSE
Chr_1	1662794	1666921	+	4128	NCAS_0A08410	0.0312041	0.331935	FALSE	4.16607e-22	1.52863	TRUE	0.447065	0.187576	FALSE	0.429835	-0.141235	FALSE
Chr_1	1667102	1668286	-	1185	NCAS_0A08420	4.21568e-06	0.692629	FALSE	1.05276e-11	1.17632	TRUE	0.00823632	0.459186	FALSE	0.63437	0.0962789	FALSE
Chr_1	1668517	1672824	+	4308	NCAS_0A08430	0.214841	0.209523	FALSE	4.92268e-28	1.72351	TRUE	0.962452	0.024528	FALSE	0.0776581	-0.298667	FALSE
Chr_1	1672940	1674403	-	1464	NCAS_0A08440	1.20017e-05	0.714449	FALSE	8.26523e-19	1.59995	TRUE	0.014411	0.427508	FALSE	0.814331	0.0509991	FALSE
Chr_1	1675033	1675152	-	120	NCAS_0A08450	0.00194573	0.482787	FALSE	1.25608e-11	1.16961	TRUE	0.849358	0.0881395	FALSE	0.236306	0.233964	FALSE
Chr_1	1675461	1677848	-	2388	NCAS_0A08460	0.0196022	0.432419	FALSE	4.81628e-12	1.3099	TRUE	0.00062082	0.545006	FALSE	0.393624	0.154766	FALSE
Chr_1	1678221	1678847	-	627	NCAS_0A08470	0.990957	0.015172	FALSE	1.43527e-11	1.29554	TRUE	0.529458	-0.201118	FALSE	0.19323	-0.271323	FALSE
Chr_1	1679279	1680403	+	1125	NCAS_0A08480	6.7127e-07	0.949943	FALSE	4.86018e-13	1.55065	TRUE	0.000192734	0.71781	FALSE	0.190013	0.280874	FALSE
Chr_1	1680395	1681039	-	645	NCAS_0A08490	4.01622e-58	1.92398	TRUE	1.09494e-23	1.47434	TRUE	1.56001e-36	1.81376	TRUE	2.2321e-23	1.44701	TRUE
Chr_1	1681212	1681514	-	303	NCAS_0A08500	1.6775e-113	3.72173	TRUE	2.47664e-40	2.62626	TRUE	8.90369e-108	3.57427	TRUE	1.94494e-92	3.32673	TRUE
Chr_1	1681690	1681902	+	213	NCAS_0A08510	3.65552e-13	1.19793	TRUE	3.23788e-14	1.46587	TRUE	8.3572e-09	1.02542	TRUE	1.13507e-07	0.956707	FALSE
Chr_1	1682150	1682674	-	525	NCAS_0A08520	0.272011	0.592154	FALSE	8.54818e-08	2.20553	TRUE	0.610421	0.361237	FALSE	0.739065	-0.177403	FALSE
Chr_1	1683095	1686007	+	2913	NCAS_0A08530	0.161443	0.200997	FALSE	7.39563e-18	1.19134	TRUE	0.97615	-0.0148074	FALSE	0.841779	-0.0425205	FALSE
Chr_1	1686732	1687763	-	1032	NCAS_0A08540	2.88809e-10	1.35256	TRUE	1.52301e-20	2.21311	TRUE	2.12717e-09	1.25139	TRUE	5.70753e-09	1.23625	TRUE
Chr_1	1689467	1691197	+	1731	NCAS_0A08550	9.87478e-12	1.92484	TRUE	1.95148e-34	3.61197	TRUE	8.88218e-19	2.18449	TRUE	3.49208e-13	1.85291	TRUE
Chr_1	1691474	1692724	-	1251	NCAS_0A08560	0.957992	-0.0116239	FALSE	3.86763e-05	0.573794	FALSE	0.912304	0.153526	FALSE	0.0054272	1.33033	TRUE
Chr_1	1693304	1696486	+	3183	NCAS_0A08570	8.67971e-06	0.683443	FALSE	5.81657e-19	1.57302	TRUE	0.0102725	0.445575	FALSE	0.903628	0.0261567	FALSE
Chr_1	1696701	1697720	+	1020	NCAS_0A08580	0.512953	0.147897	FALSE	1.51951e-33	2.13395	TRUE	0.664885	0.22237	FALSE	3.10192e-05	1.04034	TRUE
Chr_1	1698406	1699236	+	831	NCAS_0A08590	0.000901365	1.78518	TRUE	7.23531e-14	4.22579	TRUE	0.539094	0.798922	FALSE	0.667314	-0.443409	FALSE
Chr_1	1699506	1700489	+	984	NCAS_0A08600	0.919899	0.0299546	FALSE	1.46797e-09	0.985029	FALSE	0.380622	-0.218038	FALSE	0.00065508	-0.56793	FALSE
Chr_1	1700839	1702704	-	1866	NCAS_0A08610	0.307561	0.183964	FALSE	1.04281e-16	1.3527	TRUE	0.448793	-0.175217	FALSE	0.00235474	-0.447799	FALSE
Chr_1	1703407	1704018	+	612	NCAS_0A08620	7.41052e-05	0.75919	FALSE	6.79581e-27	2.12323	TRUE	0.513524	0.202342	FALSE	0.851916	-0.0416035	FALSE
Chr_1	1704322	1706103	-	1782	NCAS_0A08630	0.972313	-0.145279	FALSE	0.000308766	2.59429	TRUE	0.00904557	2.06135	TRUE	0.000287177	2.71901	TRUE
Chr_1	1707579	1708337	+	759	NCAS_0A08640	3.73453e-05	0.835636	FALSE	5.45021e-10	1.38767	TRUE	0.0368244	0.478262	FALSE	0.101484	0.361478	FALSE
Chr_1	1708721	1709839	+	1119	NCAS_0A08650	0.000151511	0.693057	FALSE	1.85838e-15	1.57441	TRUE	0.0170101	0.525542	FALSE	0.0108631	0.534177	FALSE
Chr_1	1710032	1713205	-	3174	NCAS_0A08660	0.424993	0.139018	FALSE	8.32489e-27	1.6473	TRUE	0.95837	0.0269161	FALSE	0.295635	-0.186838	FALSE
Chr_1	1713724	1716603	-	2880	NCAS_0A08670	0.824406	0.0588852	FALSE	9.10009e-05	0.693695	FALSE	0.973942	-0.0150013	FALSE	0.303563	-0.181706	FALSE
Chr_1	1716853	1718706	-	1854	NCAS_0A08680	1.48487e-19	1.70442	TRUE	5.32701e-28	2.36176	TRUE	2.1316e-15	1.3791	TRUE	1.03345e-08	1.0287	TRUE
Chr_1	1718984	1719709	-	726	NCAS_0A08690	0.00674158	0.394435	FALSE	6.98635e-22	1.47951	TRUE	0.532073	0.173285	FALSE	0.787639	-0.0549702	FALSE
Chr_1	1720290	1721213	-	924	NCAS_0A08700	0.468313	0.186758	FALSE	2.07038e-06	1.00019	TRUE	0.907522	-0.0590326	FALSE	0.196311	-0.245918	FALSE
Chr_1	1721446	1722411	+	966	NCAS_0A08710	0.687979	0.100669	FALSE	5.39947e-10	1.10501	TRUE	0.824309	-0.090108	FALSE	0.0248008	-0.382306	FALSE
Chr_1	1722511	1723752	-	1242	NCAS_0A08720	0.326076	0.424527	FALSE	9.76585e-05	1.42838	TRUE	0.337061	0.545535	FALSE	0.0397011	0.849521	FALSE
Chr_1	1724401	1726296	+	1896	NCAS_0A08730	0.622191	0.177361	FALSE	5.02676e-22	2.37945	TRUE	0.204107	0.471255	FALSE	0.123357	0.47653	FALSE
Chr_1	1727048	1728352	+	1305	NCAS_0A08740	0.0967371	0.945529	FALSE	0.000285719	1.95373	TRUE	0.547422	-0.584126	FALSE	0.347641	0.578008	FALSE
Chr_1	1728499	1729203	-	705	NCAS_0A08750	0.744249	0.0720762	FALSE	1.13337e-07	0.817317	FALSE	0.954137	-0.0299198	FALSE	0.115818	-0.279069	FALSE
Chr_1	1729600	1732737	-	3138	NCAS_0A08760	0.809869	0.0510872	FALSE	1.36997e-06	0.735691	FALSE	0.962457	-0.0268906	FALSE	0.541523	0.130782	FALSE
Chr_1	1733181	1734890	-	1710	NCAS_0A08770	0.41488	0.157812	FALSE	4.61061e-14	1.20094	TRUE	0.763109	-0.123123	FALSE	0.267275	-0.221697	FALSE
Chr_1	1735117	1739625	+	4509	NCAS_0A08780	5.85971e-06	0.694174	FALSE	2.0742e-17	1.47503	TRUE	0.00211072	0.560027	FALSE	0.361042	0.184821	FALSE
Chr_1	1739972	1740442	+	471	NCAS_0A08790	0.0716538	0.285932	FALSE	3.66301e-20	1.43334	TRUE	0.972197	0.0178359	FALSE	0.00973865	-0.445582	FALSE
Chr_1	1740576	1741481	-	906	NCAS_0A08800	0.039525	0.31488	FALSE	1.31812e-09	0.96362	FALSE	0.902683	0.0613834	FALSE	0.145224	0.267356	FALSE
Chr_1	1741889	1743649	+	1761	NCAS_0A08810	1.72132e-25	1.74548	TRUE	3.97726e-28	2.19473	TRUE	2.46662e-26	1.68643	TRUE	1.16813e-18	1.41903	TRUE
Chr_1	1743831	1745513	+	1683	NCAS_0A08820	3.76534e-05	0.729884	FALSE	1.78678e-14	1.50014	TRUE	0.00765366	0.511819	FALSE	0.0702115	0.350197	FALSE
Chr_1	1745576	1746580	-	1005	NCAS_0A08830	0.06434	0.702934	FALSE	1.30846e-08	2.12671	TRUE	0.805183	0.210261	FALSE	0.595463	0.223518	FALSE
Chr_1	1746841	1751277	+	4437	NCAS_0A08840	0.766041	0.0667932	FALSE	1.06588e-22	1.62272	TRUE	0.969493	-0.0186087	FALSE	0.0505496	-0.32497	FALSE
Chr_1	1752094	1752879	+	786	NCAS_0A08850	0.924057	-0.038096	FALSE	6.3268e-10	1.32247	TRUE	0.855313	-0.119753	FALSE	0.0109325	0.666679	FALSE
Chr_1	1753035	1753544	+	510	NCAS_0A08860	5.73089e-15	1.24088	TRUE	1.40302e-12	1.33615	TRUE	1.66202e-10	1.36661	TRUE	6.24537e-16	1.71248	TRUE
Chr_1	1753849	1755966	+	2118	NCAS_0A08870	9.028e-09	0.854976	FALSE	2.66865e-22	1.68317	TRUE	7.27401e-09	0.892591	FALSE	1.3088e-10	0.98817	FALSE
Chr_1	1756271	1757539	+	1269	NCAS_0A08880	0.879894	-0.0346215	FALSE	4.4404e-20	1.37053	TRUE	0.679007	-0.16227	FALSE	0.854677	-0.0462827	FALSE
Chr_1	1757639	1759930	-	2292	NCAS_0A08890	0.0950084	0.343899	FALSE	1.63713e-06	0.975282	FALSE	0.325576	0.217315	FALSE	0.767522	-0.0580224	FALSE
Chr_1	1760210	1761463	+	1254	NCAS_0A08900	0.377879	0.188292	FALSE	3.79315e-16	1.42397	TRUE	0.953239	-0.0293911	FALSE	0.00264183	-0.485602	FALSE
Chr_1	1761639	1763270	-	1632	NCAS_0A08910	0.37501	0.189336	FALSE	2.05608e-05	0.793816	FALSE	0.220383	-0.295504	FALSE	0.0290347	-0.417739	FALSE
Chr_1	1765699	1767498	+	1800	NCAS_0A08920	0.0009697	0.509842	FALSE	6.74398e-26	1.79301	TRUE	0.18695	0.277037	FALSE	0.182136	0.238319	FALSE
Chr_1	1768074	1769285	+	1212	NCAS_0A08930	0.858127	0.0652068	FALSE	5.29727e-06	1.05092	TRUE	0.916901	0.049584	FALSE	0.406346	-0.14947	FALSE
Chr_1	1769382	1771421	-	2040	NCAS_0A08940	0.00572166	0.430724	FALSE	2.77968e-11	1.09355	TRUE	0.0416799	0.391123	FALSE	0.725773	0.0762984	FALSE
Chr_1	1771614	1773563	-	1950	NCAS_0A08950	8.99841e-05	0.567851	FALSE	1.97865e-22	1.57635	TRUE	0.0677578	0.342415	FALSE	0.866084	-0.0351265	FALSE
Chr_1	1774232	1775620	+	1389	NCAS_0A08960	1.84144e-17	1.39656	TRUE	1.97497e-15	1.55013	TRUE	4.07713e-14	1.32541	TRUE	1.46483e-11	1.1996	TRUE
Chr_1	1776187	1778394	+	2208	NCAS_0A08970	0.000338296	0.579216	FALSE	3.26841e-18	1.56234	TRUE	0.0430953	0.373474	FALSE	0.0581196	0.327596	FALSE
Chr_1	1778830	1780647	+	1818	NCAS_0A08980	9.30361e-09	1.65742	TRUE	3.87205e-15	2.42786	TRUE	1.80639e-07	1.28025	TRUE	0.0526641	0.536022	FALSE
Chr_1	1780800	1782201	-	1402	NCAS_0A08990	3.71335e-09	0.947803	FALSE	4.06196e-16	1.50076	TRUE	0.0124778	0.485806	FALSE	0.214538	0.252325	FALSE
Chr_1	1782654	1783820	+	1167	NCAS_0A09000	0.0426865	0.348339	FALSE	9.75734e-13	1.25671	TRUE	0.913379	-0.0494126	FALSE	0.220337	-0.212935	FALSE
Chr_1	1783858	1785246	-	1389	NCAS_0A09010	0.212605	0.193436	FALSE	2.94024e-11	0.979775	FALSE	0.894779	-0.0570978	FALSE	0.172325	-0.223033	FALSE
Chr_1	1785564	1787231	-	1668	NCAS_0A09020	0.989636	0.004299	FALSE	1.41552e-09	0.891519	FALSE	0.953239	-0.0374905	FALSE	0.638312	0.114101	FALSE
Chr_1	1787514	1789550	+	2037	NCAS_0A09030	0.957018	-0.0135559	FALSE	0.000219248	0.609838	FALSE	1	-0.000190418	FALSE	0.417782	0.16813	FALSE
Chr_1	1789706	1791235	-	1530	NCAS_0A09040	0.0392683	0.371498	FALSE	2.92564e-25	1.8968	TRUE	0.398988	0.200182	FALSE	0.781054	-0.0552724	FALSE
Chr_1	1791486	1792697	-	1212	NCAS_0A09050	0.0974702	0.277243	FALSE	1.21779e-12	1.13877	TRUE	0.899182	0.0615161	FALSE	0.571562	-0.112239	FALSE
Chr_1	1793006	1793854	+	849	NCAS_0A09060	0.00143246	0.681143	FALSE	5.91976e-26	2.26616	TRUE	0.0430953	0.450424	FALSE	0.826959	-0.0542853	FALSE
Chr_1	1794111	1796423	+	2313	NCAS_0A09070	0.301427	0.208504	FALSE	3.94952e-37	2.23294	TRUE	0.945315	-0.0309608	FALSE	0.0115612	-0.391016	FALSE
Chr_1	1797353	1798693	-	1341	NCAS_0A09080	6.47345e-06	1.11557	TRUE	8.45267e-11	1.79306	TRUE	3.18585e-09	0.989149	FALSE	0.00354587	0.526701	FALSE
Chr_1	1798908	1799324	+	417	NCAS_0A09090	0.143499	0.333914	FALSE	0.00525991	0.606931	FALSE	0.940591	0.0350775	FALSE	0.781881	-0.0539282	FALSE
Chr_1	1799814	1800812	+	999	NCAS_0A09100	1.33243e-38	1.75255	TRUE	1.63358e-12	1.17935	TRUE	1.26127e-25	1.834	TRUE	1.50228e-13	1.32344	TRUE
Chr_1	1801017	1804211	-	3195	NCAS_0A09110	0.919899	0.0372256	FALSE	5.99321e-06	0.996086	FALSE	0.984674	0.00974361	FALSE	0.199743	-0.207985	FALSE
Chr_1	1804497	1806905	-	2409	NCAS_0A09120	0.392645	0.17589	FALSE	1.55164e-21	1.66555	TRUE	0.686472	-0.134259	FALSE	0.00671995	-0.452251	FALSE
Chr_1	1807477	1808598	-	1122	NCAS_0A09130	0.142449	0.249111	FALSE	5.33589e-27	1.73464	TRUE	0.941445	0.0349372	FALSE	0.0737682	-0.293511	FALSE
Chr_1	1808810	1810162	-	1353	NCAS_0A09140	0.878712	0.0526002	FALSE	6.80743e-07	0.893453	FALSE	0.594833	0.197445	FALSE	0.731284	0.0879636	FALSE
Chr_1	1810484	1811197	-	714	NCAS_0A09150	0.367084	0.144852	FALSE	1.40205e-12	1.02887	TRUE	0.689347	0.205405	FALSE	0.000586279	0.855096	FALSE
Chr_1	1811448	1813769	+	2322	NCAS_0A09160	0.920568	0.0360128	FALSE	1.47676e-19	1.72348	TRUE	0.51916	-0.220154	FALSE	0.0143015	-0.524176	FALSE
Chr_1	1813960	1815846	+	1887	NCAS_0A09170	0.368199	0.239559	FALSE	4.07282e-12	1.58863	TRUE	0.0649664	0.396877	FALSE	0.102901	0.329913	FALSE
Chr_1	1816073	1817572	+	1500	NCAS_0A09180	0.00951133	0.437672	FALSE	1.21223e-31	2.03531	TRUE	0.940591	0.041854	FALSE	0.339594	-0.194208	FALSE
Chr_1	1817632	1818885	-	1254	NCAS_0A09190	3.71515e-23	1.38239	TRUE	6.72838e-26	1.74197	TRUE	4.31291e-11	1.06674	TRUE	3.31819e-09	0.969473	FALSE
Chr_1	1819134	1820471	-	1338	NCAS_0A09200	0.254658	0.226708	FALSE	3.1076e-06	0.833497	FALSE	0.959411	0.0325533	FALSE	0.430508	-0.172794	FALSE
Chr_1	1820713	1822845	-	2133	NCAS_0A09210	0.18277	0.203698	FALSE	1.68946e-27	1.55803	TRUE	0.797758	-0.089032	FALSE	0.00304637	-0.436546	FALSE
Chr_1	1823213	1825708	-	2496	NCAS_0A09220	0.34389	0.15918	FALSE	9.54143e-17	1.23598	TRUE	0.953239	-0.0291536	FALSE	0.0782276	-0.296171	FALSE
Chr_1	1825865	1826377	+	513	NCAS_0A09230	0.0550787	0.35018	FALSE	5.45645e-11	1.20376	TRUE	0.488557	0.207163	FALSE	0.821712	0.0554609	FALSE
Chr_1	1826454	1827269	-	816	NCAS_0A09240	0.421269	0.175715	FALSE	4.72961e-06	0.833847	FALSE	0.84152	0.0867423	FALSE	0.705411	-0.0787132	FALSE
Chr_1	1828203	1829177	+	975	NCAS_0A09250	0.752702	0.0783416	FALSE	3.61812e-08	0.945375	FALSE	0.986292	0.0134839	FALSE	0.936891	0.0215621	FALSE
Chr_1	1829435	1831219	+	1785	NCAS_0A09260	0.966213	-0.0121851	FALSE	7.20401e-11	1.51831	TRUE	0.841647	-0.075276	FALSE	0.0779681	-0.276996	FALSE
Chr_1	1831820	1832827	-	1008	NCAS_0A09270	0.711942	-0.0880334	FALSE	1.8063e-05	1.10125	TRUE	0.991359	-0.00534879	FALSE	0.191316	-0.300161	FALSE
Chr_1	1834076	1835131	-	1056	NCAS_0A09280	0.0368318	0.300909	FALSE	1.96588e-05	0.641565	FALSE	0.784246	0.129242	FALSE	0.277399	0.24202	FALSE
Chr_1	1836064	1838772	+	2709	NCAS_0A09290	6.73793e-06	0.734167	FALSE	3.91886e-20	1.6981	TRUE	0.000950298	0.563156	FALSE	0.427394	0.154928	FALSE
Chr_1	1838846	1840525	-	1680	NCAS_0A09300	0.0131917	0.461356	FALSE	4.32713e-18	1.67336	TRUE	0.0223721	0.407921	FALSE	0.73738	-0.0685664	FALSE
Chr_1	1840751	1841398	+	648	NCAS_0A09310	0.279017	0.25179	FALSE	4.82879e-13	1.49453	TRUE	0.92752	-0.0466963	FALSE	0.0876989	-0.319335	FALSE
Chr_1	1841541	1843448	-	1908	NCAS_0A09320	0.164375	0.23157	FALSE	6.52821e-06	0.722808	FALSE	0.732217	0.127759	FALSE	0.360729	-0.177002	FALSE
Chr_1	1844122	1847805	+	3684	NCAS_0A09330	0.0284708	0.384479	FALSE	2.58632e-10	1.14396	TRUE	0.494966	0.181314	FALSE	0.189041	-0.230051	FALSE
Chr_1	1847972	1850968	-	2997	NCAS_0A09340	0.842904	0.059729	FALSE	3.2411e-12	1.31398	TRUE	0.948946	0.031882	FALSE	0.153635	-0.239877	FALSE
Chr_1	1852084	1852887	+	804	NCAS_0A09350	3.24856e-05	2.98644	TRUE	3.28107e-07	3.79922	TRUE	0.016467	2.34109	TRUE	0.0619445	1.78367	FALSE
Chr_1	1853291	1856950	+	3660	NCAS_0A09360	0.868703	-0.0354479	FALSE	0.000247784	0.537618	FALSE	0.396134	-0.209652	FALSE	0.033356	-0.359709	FALSE
Chr_1	1857239	1858969	-	1731	NCAS_0A09370	0.885728	0.0448201	FALSE	2.87682e-07	0.892869	FALSE	0.962014	0.0305775	FALSE	0.784632	0.0670583	FALSE
Chr_1	1859233	1862289	+	3057	NCAS_0A09380	0.832959	-0.0524368	FALSE	6.8264e-16	1.45053	TRUE	0.335648	-0.230067	FALSE	0.0919824	-0.298572	FALSE
Chr_1	1862500	1864365	-	1866	NCAS_0A09390	0.525847	0.127791	FALSE	1.74621e-36	2.11651	TRUE	0.613798	-0.161147	FALSE	0.000275016	-0.620158	FALSE
Chr_1	1864649	1865641	-	993	NCAS_0A09400	4.84534e-18	1.51159	TRUE	1.02068e-05	0.934442	FALSE	1.59831e-21	1.38527	TRUE	8.24683e-16	1.18968	TRUE
Chr_1	1865924	1868722	-	2799	NCAS_0A09410	1.70303e-32	2.83798	TRUE	1.1091e-17	2.39852	TRUE	3.4303e-40	2.64517	TRUE	1.14251e-30	2.32444	TRUE
Chr_1	1869312	1871666	+	2355	NCAS_0A09420	0.41651	0.164595	FALSE	1.6589e-30	1.90893	TRUE	0.987252	0.00857139	FALSE	0.00125665	-0.524446	FALSE
Chr_1	1872106	1873569	+	1464	NCAS_0A09430	3.43334e-05	0.501377	FALSE	2.74311e-20	1.26929	TRUE	0.178108	0.279053	FALSE	0.249945	0.20707	FALSE
Chr_1	1873689	1877132	-	3444	NCAS_0A09440	0.57203	0.136581	FALSE	1.63081e-22	1.74116	TRUE	0.977897	0.0145518	FALSE	0.454976	-0.138239	FALSE
Chr_1	1877793	1879892	+	2100	NCAS_0A09450	1.79872e-09	0.828949	FALSE	4.21222e-18	1.3953	TRUE	5.58726e-05	0.684891	FALSE	0.00321226	0.514337	FALSE
Chr_1	1880409	1883048	+	2640	NCAS_0A09460	0.446397	0.136844	FALSE	5.49677e-25	1.56981	TRUE	0.693591	-0.133638	FALSE	0.0752705	-0.30961	FALSE
Chr_1	1883183	1887730	-	4548	NCAS_0A09470	0.584717	0.11782	FALSE	2.35734e-13	1.28187	TRUE	0.732247	-0.121476	FALSE	0.164647	-0.246544	FALSE
Chr_1	1888123	1888620	-	498	NCAS_0A09480	0.219142	0.199812	FALSE	5.37825e-14	1.1748	TRUE	0.987252	-0.00929643	FALSE	0.353795	0.224623	FALSE
Chr_1	1888871	1889527	-	657	NCAS_0A09490	0.0143803	0.281589	FALSE	3.78247e-17	1.02696	TRUE	0.781067	0.109529	FALSE	0.750857	0.0673853	FALSE
Chr_1	1889764	1892859	-	3096	NCAS_0A09500	0.837457	-0.0892465	FALSE	5.56999e-06	1.4521	TRUE	0.947687	0.0334822	FALSE	0.518941	-0.122465	FALSE
Chr_1	1893312	1895591	-	2280	NCAS_0A09510	0.0982024	0.253831	FALSE	2.9826e-10	0.967204	FALSE	0.909165	0.0534649	FALSE	0.0327325	-0.352469	FALSE
Chr_1	1895860	1897635	-	1776	NCAS_0A09520	1.86929e-11	1.03832	TRUE	1.44305e-23	1.79303	TRUE	5.92432e-14	1.24149	TRUE	3.16298e-09	1.00215	TRUE
Chr_1	1898357	1900738	-	2382	NCAS_0A09530	0.000178481	0.523276	FALSE	2.85091e-13	1.13679	TRUE	0.00247083	0.507544	FALSE	0.416801	0.15263	FALSE
Chr_1	1901080	1902609	+	1530	NCAS_0A09540	0.0128105	0.509449	FALSE	1.73188e-12	1.47845	TRUE	0.0267743	0.539153	FALSE	0.0230481	0.527709	FALSE
Chr_1	1903472	1903891	-	420	NCAS_0A09550	0.415089	0.161351	FALSE	1.12455e-09	0.995138	FALSE	0.969493	0.0303995	FALSE	0.00977287	0.654433	FALSE
Chr_1	1904178	1905968	-	1791	NCAS_0A09560	0.48908	-0.126486	FALSE	2.98325e-31	1.89195	TRUE	0.0388849	-0.412434	FALSE	0.120167	-0.298041	FALSE
Chr_1	1907017	1909200	-	2184	NCAS_0A09570	1.12242e-11	1.47399	TRUE	5.93236e-19	2.12537	TRUE	1.46177e-06	0.997356	FALSE	0.000456422	0.762085	FALSE
Chr_1	1910298	1912754	-	2457	NCAS_0A09580	0.783934	0.079531	FALSE	2.30245e-15	1.54536	TRUE	0.906595	-0.0498436	FALSE	0.0233227	-0.34137	FALSE
Chr_1	1913048	1918357	+	5310	NCAS_0A09590	0.876935	0.0439751	FALSE	2.25449e-16	1.49396	TRUE	0.858497	-0.0696418	FALSE	0.0123454	-0.383438	FALSE
Chr_1	1918722	1919969	+	1248	NCAS_0A09600	0.725135	0.119545	FALSE	1.07269e-10	1.43802	TRUE	0.999463	0.00259083	FALSE	0.597258	-0.109652	FALSE
Chr_1	1920171	1922258	-	2088	NCAS_0A09610	0.426664	0.16045	FALSE	2.45394e-15	1.30107	TRUE	0.874893	0.0762476	FALSE	0.662996	0.0960962	FALSE
Chr_1	1923028	1923234	-	207	NCAS_0A09620	0.652207	0.133094	FALSE	5.92904e-08	1.37796	TRUE	0.0990183	-0.438811	FALSE	6.83797e-05	-0.911403	FALSE
Chr_1	1923949	1924530	-	582	NCAS_0A09630	0.905671	-0.0268966	FALSE	0.000108548	0.820357	FALSE	0.358318	-0.254133	FALSE	0.00329349	-0.573851	FALSE
Chr_1	1924869	1926374	+	1506	NCAS_0A09640	1.8341e-30	1.75789	TRUE	3.52577e-21	1.75304	TRUE	8.21536e-32	1.5987	TRUE	9.99718e-20	1.25392	TRUE
Chr_1	1927623	1928420	-	798	NCAS_0A09650	0.063393	-0.404254	FALSE	0.0957803	0.383522	FALSE	0.562485	-0.205051	FALSE	0.875002	-0.0412546	FALSE
Chr_1	1929179	1930264	+	1086	NCAS_0A09660	8.71223e-11	0.880936	FALSE	4.14851e-49	2.31988	TRUE	0.0123802	0.646398	FALSE	1.64474e-10	1.45728	TRUE
Chr_1	1930389	1931312	-	924	NCAS_0A09670	0.186339	0.204026	FALSE	5.88902e-17	1.18719	TRUE	0.962457	0.0372794	FALSE	0.0754086	0.462647	FALSE
Chr_1	1931544	1932242	+	699	NCAS_0A09680	0.451857	0.115243	FALSE	1.12237e-06	0.651803	FALSE	0.8778	0.209566	FALSE	0.00468203	1.42897	TRUE
Chr_1	1932320	1932838	-	519	NCAS_0A09690	0.592117	-0.132495	FALSE	0.00864619	0.558882	FALSE	0.922941	0.132842	FALSE	0.00400199	1.33196	TRUE
Chr_1	1933072	1934430	+	1359	NCAS_0A09700	0.257393	-0.19841	FALSE	8.09235e-07	0.847225	FALSE	0.751972	-0.130979	FALSE	0.175936	-0.273231	FALSE
Chr_1	1934629	1935747	+	1119	NCAS_0A09710	0.969693	0.0240605	FALSE	2.57697e-08	1.31346	TRUE	0.981402	-0.0102942	FALSE	0.467164	-0.130748	FALSE
Chr_1	1935843	1936700	-	858	NCAS_0A09720	6.37577e-14	1.43167	TRUE	4.03226e-15	1.7399	TRUE	4.97713e-08	1.27382	TRUE	1.61624e-08	1.32396	TRUE
Chr_1	1936921	1939008	+	2088	NCAS_0A09730	0.265994	-0.250049	FALSE	6.56076e-17	1.74119	TRUE	0.860717	0.103431	FALSE	0.405052	0.21242	FALSE
Chr_1	1939146	1939304	+	159	NCAS_0A09740	9.8957e-05	0.677695	FALSE	1.70032e-09	1.1794	TRUE	0.464114	0.789983	FALSE	5.09941e-07	3.21838	TRUE
Chr_1	1940202	1942370	+	2169	NCAS_0A09750	0.981708	0.00158561	FALSE	9.74098e-14	1.34569	TRUE	0.732384	-0.117937	FALSE	0.127836	-0.260895	FALSE
Chr_1	1943012	1946644	+	3633	NCAS_0A09760	0.973729	0.0114918	FALSE	1.27857e-10	1.07801	TRUE	0.945825	-0.033383	FALSE	0.171282	-0.239014	FALSE
Chr_1	1947718	1954359	+	6642	NCAS_0A09770	0.556259	-0.33445	FALSE	0.00679598	1.30304	TRUE	0.413678	-0.212609	FALSE	0.0803545	0.312378	FALSE
Chr_1	1954548	1955654	+	1107	NCAS_0A09780	1.99167e-07	0.911746	FALSE	9.78954e-12	1.35211	TRUE	1.41374e-07	0.855373	FALSE	0.250246	0.22072	FALSE
Chr_1	1955700	1957901	-	2202	NCAS_0A09790	3.28917e-19	1.63643	TRUE	2.18146e-22	2.04715	TRUE	5.471e-16	1.69972	TRUE	2.23778e-09	1.29412	TRUE
Chr_1	1958223	1959212	-	990	NCAS_0A09800	0.00355362	0.442829	FALSE	6.15211e-10	1.01681	TRUE	0.07264	0.323135	FALSE	0.827314	0.0448694	FALSE
Chr_1	1960166	1961020	+	855	NCAS_0A09810	0.601361	0.16618	FALSE	2.84876e-05	0.920946	FALSE	0.59616	0.158138	FALSE	0.48066	-0.133322	FALSE
Chr_1	1963035	1963487	+	453	NCAS_0A09820	2.09572e-08	2.31026	TRUE	0.0015674	1.51269	TRUE	5.11034e-08	1.85737	TRUE	3.78613e-06	1.65481	TRUE
Chr_1	1964190	1965041	-	852	NCAS_0A09830	1.04615e-07	1.10333	TRUE	9.71238e-06	1.06313	TRUE	3.81214e-14	1.16837	TRUE	3.76658e-08	0.88286	FALSE
Chr_1	1965276	1968074	-	2799	NCAS_0A09840	0.851577	0.0396888	FALSE	8.33292e-12	0.992434	FALSE	0.495064	-0.174628	FALSE	0.000954395	-0.511454	FALSE
Chr_1	1968777	1969820	-	1044	NCAS_0A09850	0.222464	0.209165	FALSE	1.0462e-19	1.42272	TRUE	0.825164	-0.0856431	FALSE	0.0151488	-0.389252	FALSE
Chr_1	1971145	1973748	+	2604	NCAS_0A09860	1	0.429415	FALSE	0.0102098	2.17193	TRUE	0.986292	-0.0354494	FALSE	0.971953	-0.0167919	FALSE
Chr_1	1974028	1974912	-	885	NCAS_0A09870	0.364327	0.188677	FALSE	8.38246e-14	1.35573	TRUE	0.738342	0.114701	FALSE	0.0725932	-0.297066	FALSE
Chr_1	1975537	1978155	-	2619	NCAS_0A09880	3.88122e-54	1.97663	TRUE	1.92298e-53	2.37459	TRUE	2.19886e-39	1.9647	TRUE	2.8697e-29	1.69219	TRUE
Chr_1	1978423	1979433	-	1011	NCAS_0A09890	0.0168997	0.380676	FALSE	4.26351e-24	1.66934	TRUE	0.882225	0.0741863	FALSE	0.48066	-0.147079	FALSE
Chr_1	1979679	1981313	+	1635	NCAS_0A09900	0.000582519	0.553109	FALSE	2.08834e-20	1.63466	TRUE	0.0504947	0.371953	FALSE	0.344594	0.180117	FALSE
Chr_1	1981377	1982594	-	1218	NCAS_0A09910	0.523415	0.151641	FALSE	2.17132e-09	1.13432	TRUE	0.867363	0.0823709	FALSE	0.741184	0.0778437	FALSE
Chr_1	1982831	1984726	-	1896	NCAS_0A09920	0.253698	0.231969	FALSE	4.28896e-27	1.9265	TRUE	0.997335	0.00362137	FALSE	0.120416	-0.273084	FALSE
Chr_1	1984926	1986545	+	1620	NCAS_0A09930	2.78795e-06	0.664817	FALSE	8.73629e-26	1.68398	TRUE	0.000222387	0.532883	FALSE	0.182084	0.212177	FALSE
Chr_1	1986687	1988171	-	1485	NCAS_0A09940	0.504534	0.14026	FALSE	1.31586e-35	2.01849	TRUE	0.92752	-0.0443759	FALSE	0.0702115	-0.313084	FALSE
Chr_1	1988479	1993416	+	4938	NCAS_0A09950	0.919899	-0.0241794	FALSE	5.91198e-19	1.41421	TRUE	0.643173	-0.138475	FALSE	0.000520463	-0.534413	FALSE
Chr_1	1993554	1995926	-	2373	NCAS_0A09960	0.466298	0.151594	FALSE	6.31096e-18	1.52192	TRUE	0.563873	-0.173163	FALSE	0.575469	0.115053	FALSE
Chr_1	1996296	1998347	-	2052	NCAS_0A09970	0.480476	-0.165334	FALSE	1.49021e-14	1.62208	TRUE	0.958872	-0.0278494	FALSE	0.302266	-0.19982	FALSE
Chr_1	1998622	1999017	-	396	NCAS_0A09980	0.189823	-0.284255	FALSE	8.76904e-10	1.33173	TRUE	0.85687	-0.111501	FALSE	0.0582824	0.477834	FALSE
Chr_1	2000437	2001295	+	859	NCAS_0A09990	0.603245	0.0975319	FALSE	7.8513e-26	1.61238	TRUE	0.822501	0.108406	FALSE	0.0984016	0.34134	FALSE
Chr_1	2001856	2002690	+	835	NCAS_0A10000	0.847883	0.0398173	FALSE	1.40906e-06	0.69398	FALSE	0.953239	0.0435751	FALSE	0.029457	0.529825	FALSE
Chr_1	2003039	2004559	-	1521	NCAS_0A10010	0.166514	0.272088	FALSE	9.62189e-14	1.40903	TRUE	0.973942	-0.0165842	FALSE	0.122252	0.291382	FALSE
Chr_1	2005133	2006716	-	1584	NCAS_0A10020	0.76354	0.10046	FALSE	9.95553e-21	1.88897	TRUE	0.632114	0.167453	FALSE	0.953338	-0.0150268	FALSE
Chr_1	2007187	2008038	+	852	NCAS_0A10030	0.00269675	0.416344	FALSE	1.12292e-28	1.64337	TRUE	0.502318	0.201138	FALSE	0.298037	0.209578	FALSE
Chr_1	2008305	2008517	-	213	NCAS_0A10040	0.834118	-0.0432979	FALSE	0.00028876	0.532762	FALSE	0.717718	-0.124839	FALSE	0.0501938	-0.331922	FALSE
Chr_1	2009980	2010669	-	690	NCAS_0A10050	0.739817	-0.0621672	FALSE	3.62591e-21	1.40412	TRUE	0.664885	-0.143006	FALSE	0.504102	-0.131185	FALSE
Chr_1	2011707	2013479	+	1773	NCAS_0A10060	0.43522	-0.28765	FALSE	0.00131008	1.07496	TRUE	0.9748	-0.0149254	FALSE	0.0324904	-0.365955	FALSE
Chr_1	2013610	2015775	-	2166	NCAS_0A10070	0.000100572	0.681156	FALSE	6.65196e-25	1.97326	TRUE	0.0399172	0.444496	FALSE	0.130184	0.315944	FALSE
Chr_1	2016171	2017445	-	1275	NCAS_0A10080	0.892221	0.0868826	FALSE	1.95049e-09	1.58206	TRUE	0.953239	-0.0421271	FALSE	0.265266	0.312051	FALSE
Chr_1	2017715	2018284	+	570	NCAS_0A10090	0.627984	0.11318	FALSE	6.7634e-13	1.47694	TRUE	0.817798	0.370971	FALSE	5.37127e-05	2.5592	TRUE
Chr_1	2018459	2020810	+	2352	NCAS_0A10100	0.0830134	0.283132	FALSE	2.81107e-26	1.69912	TRUE	0.94274	0.0308769	FALSE	0.244866	-0.181347	FALSE
Chr_1	2020983	2021876	-	894	NCAS_0A10110	0.931081	-0.0133387	FALSE	1.07746e-13	1.22417	TRUE	0.940591	0.0516529	FALSE	0.0923392	0.383589	FALSE
Chr_1	2022090	2023361	+	1272	NCAS_0A10120	0.374946	0.215012	FALSE	3.65291e-27	2.10351	TRUE	0.432921	-0.199118	FALSE	0.0814358	-0.305923	FALSE
Chr_1	2023534	2023932	-	399	NCAS_0A10130	0.387423	-0.131297	FALSE	2.39156e-16	1.1216	TRUE	0.864218	-0.101178	FALSE	0.594067	0.145112	FALSE
Chr_1	2024355	2024735	+	381	NCAS_0A10140	0.462224	-0.148892	FALSE	1.08005e-09	1.08509	TRUE	0.805183	-0.131497	FALSE	0.248864	0.282667	FALSE
Chr_1	2024971	2025297	-	327	NCAS_0A10150	0.929731	0.0253459	FALSE	0.00228668	0.473955	FALSE	0.8573	-0.0893926	FALSE	0.953188	0.0158251	FALSE
Chr_1	2025950	2026969	+	1020	NCAS_0A10160	0.834118	0.0819427	FALSE	1.64305e-12	1.37934	TRUE	0.325081	-0.234672	FALSE	0.000146648	-0.637252	FALSE
Chr_1	2027096	2028022	-	927	NCAS_0A10170	0.0737209	0.367901	FALSE	1.21133e-18	1.71842	TRUE	0.953239	-0.0308435	FALSE	0.0926489	-0.30071	FALSE
Chr_1	2028343	2029656	-	1314	NCAS_0A10180	0.911196	-0.0256027	FALSE	1.13429e-05	0.685873	FALSE	0.0326526	-0.370515	FALSE	1.12484e-05	-0.669332	FALSE
Chr_1	2030292	2031392	-	1101	NCAS_0A10190	1.54821e-26	1.48499	TRUE	6.99372e-12	1.16605	TRUE	1.39115e-11	1.3156	TRUE	2.06926e-10	1.24895	TRUE
Chr_1	2032610	2034163	+	1554	NCAS_0A10200	0.014778	0.46979	FALSE	6.34148e-11	1.34671	TRUE	0.95281	0.0531565	FALSE	0.00373638	0.76969	FALSE
Chr_1	2034705	2036654	+	1950	NCAS_0A10210	0.361758	0.21116	FALSE	2.47447e-09	1.21195	TRUE	0.981431	0.0122466	FALSE	0.416244	-0.147045	FALSE
Chr_1	2037613	2038122	+	510	NCAS_0A10220	6.21198e-05	0.591291	FALSE	6.5297e-23	1.57631	TRUE	0.56513	0.176052	FALSE	0.241912	0.224156	FALSE
Chr_1	2038321	2041740	-	3420	NCAS_0A10230	0.72861	0.0778929	FALSE	4.90683e-26	1.76713	TRUE	0.890504	0.0648584	FALSE	0.52749	-0.1242	FALSE
Chr_1	2042143	2045025	-	2883	NCAS_0A10240	0.950667	-0.0114326	FALSE	4.14248e-35	1.79586	TRUE	0.959226	-0.028004	FALSE	0.186535	-0.24441	FALSE
Chr_1	2045419	2046318	+	900	NCAS_0A10250	0.0622812	0.356536	FALSE	6.52587e-12	1.3403	TRUE	0.212268	0.292609	FALSE	0.662821	-0.0946315	FALSE
Chr_1	2046528	2047709	-	1182	NCAS_0A10260	0.108013	0.234924	FALSE	4.40039e-07	0.736757	FALSE	0.867563	0.0820091	FALSE	0.691457	0.0919377	FALSE
Chr_1	2048316	2049500	-	1185	NCAS_0A10270	0.0065015	0.401973	FALSE	4.46159e-08	0.880756	FALSE	0.130358	0.31536	FALSE	0.0817508	0.313934	FALSE
Chr_1	2049779	2050918	-	1140	NCAS_0A10280	2.9593e-05	0.72227	FALSE	5.67157e-21	1.77229	TRUE	0.000196473	0.724186	FALSE	0.00130608	0.632727	FALSE
Chr_1	2051582	2053111	-	1530	NCAS_0A10290	0.240521	0.242888	FALSE	9.42848e-27	1.97974	TRUE	0.740305	-0.115408	FALSE	0.000409294	-0.566962	FALSE
Chr_1	2053426	2054754	-	1329	NCAS_0A10300	0.982613	0.00678111	FALSE	7.22265e-32	1.65026	TRUE	0.206935	-0.231097	FALSE	0.000559938	-0.484373	FALSE
Chr_1	2055207	2056868	+	1662	NCAS_0A10310	0.476739	0.189718	FALSE	6.25598e-18	1.83095	TRUE	0.974742	-0.0133925	FALSE	0.401151	-0.147305	FALSE
Chr_1	2057154	2058242	+	1089	NCAS_0A10320	0.999162	0.000493214	FALSE	3.57197e-12	0.966001	FALSE	0.983448	0.0292986	FALSE	0.00148324	1.36726	TRUE
Chr_1	2058451	2059500	-	1050	NCAS_0A10330	0.00618923	0.424074	FALSE	8.20296e-18	1.40926	TRUE	0.829894	0.0983213	FALSE	0.808946	-0.0550459	FALSE
Chr_1	2059711	2060328	-	618	NCAS_0A10340	0.197563	0.254928	FALSE	6.19285e-14	1.33256	TRUE	0.470229	0.213573	FALSE	0.716715	0.0851861	FALSE
Chr_1	2060558	2062450	+	1893	NCAS_0A10350	3.68565e-10	0.994108	FALSE	4.12178e-08	1.0262	TRUE	4.82407e-10	0.928069	FALSE	3.45729e-05	0.641877	FALSE
Chr_1	2062680	2063822	-	1143	NCAS_0A10360	0.22507	0.232969	FALSE	4.28028e-35	2.17518	TRUE	0.463069	-0.201484	FALSE	0.120772	-0.285366	FALSE
Chr_1	2064277	2064966	+	690	NCAS_0A10370	0.085249	1.26588	FALSE	1.28949e-05	3.48747	TRUE	0.788667	0.554014	FALSE	0.82684	0.2987	FALSE
Chr_1	2065145	2065510	-	366	NCAS_0A10380	0.0746528	0.367029	FALSE	3.50281e-14	1.50378	TRUE	0.973232	0.0221379	FALSE	0.959532	0.0163027	FALSE
Chr_1	2065684	2068779	-	3096	NCAS_0A10390	0.546766	0.16601	FALSE	5.32155e-12	1.54518	TRUE	0.978256	0.0146444	FALSE	0.0276182	-0.388463	FALSE
Chr_1	2069371	2070525	-	1155	NCAS_0A10400	0.716003	-0.269544	FALSE	2.32403e-08	3.30095	TRUE	0.732247	-0.651447	FALSE	0.532331	-0.698017	FALSE
Chr_1	2070771	2071991	-	1221	NCAS_0A10410	0.874494	-0.139715	FALSE	0.0187701	1.3641	TRUE	0.741005	-0.139677	FALSE	0.0891507	0.34829	FALSE
Chr_1	2072360	2073055	-	696	NCAS_0A10420	0.0165716	0.508976	FALSE	4.21009e-15	1.71697	TRUE	0.843249	0.0748635	FALSE	0.0656008	-0.287701	FALSE
Chr_1	2073293	2074492	+	1200	NCAS_0A10430	0.68864	0.135756	FALSE	2.92733e-20	2.18219	TRUE	0.987252	0.0109602	FALSE	0.125634	-0.29828	FALSE
Chr_1	2074557	2075066	-	510	NCAS_0A10440	5.01983e-19	1.56767	TRUE	1.00752e-32	2.36716	TRUE	8.1657e-10	1.01631	TRUE	2.78608e-05	0.730542	FALSE
Chr_1	2075423	2076802	+	1380	NCAS_0A10450	0.913071	0.0273986	FALSE	2.90147e-07	0.788586	FALSE	0.676114	-0.134533	FALSE	0.0142115	-0.401779	FALSE
Chr_1	2077290	2078119	+	830	NCAS_0A10460	0.885526	0.0316147	FALSE	0.000144121	0.545543	FALSE	0.940647	-0.0482803	FALSE	0.172325	0.320463	FALSE
Chr_1	2078483	2080231	-	1749	NCAS_0A10470	0.283677	-0.210218	FALSE	1.10989e-12	1.34962	TRUE	0.516142	-0.172114	FALSE	0.000208183	-0.579894	FALSE
Chr_1	2080558	2083242	-	2685	NCAS_0A10480	0.394939	0.159588	FALSE	2.42541e-28	1.74553	TRUE	0.912304	-0.0540616	FALSE	0.0084233	-0.452915	FALSE
Chr_1	2083685	2086582	-	2898	NCAS_0A10490	0.662379	0.0814626	FALSE	3.31484e-30	1.65397	TRUE	0.940647	-0.0360516	FALSE	0.278479	-0.196803	FALSE
Chr_1	2087347	2088783	-	1437	NCAS_0A10500	4.26307e-09	1.26479	TRUE	2.09689e-16	2.01357	TRUE	5.66642e-10	1.00467	TRUE	7.92443e-05	0.673092	FALSE
Chr_1	2089103	2089699	-	597	NCAS_0A10510	0.227976	-0.228699	FALSE	7.41991e-05	0.710489	FALSE	0.973863	0.0531483	FALSE	0.0100831	1.40406	TRUE
Chr_1	2091961	2094384	-	2424	NCAS_0A10520	2.98409e-99	3.12974	TRUE	4.57979e-28	1.99873	TRUE	2.07797e-108	3.09647	TRUE	2.41233e-78	2.636	TRUE
Chr_1	2096115	2097062	+	948	NCAS_0A10530	0.58214	0.101388	FALSE	4.07127e-18	1.31898	TRUE	0.973942	-0.0167391	FALSE	0.707668	0.0815756	FALSE
Chr_1	2097795	2100428	+	2634	NCAS_0A10540	0.0293803	0.465252	FALSE	4.27676e-14	1.63454	TRUE	0.00249163	0.504792	FALSE	0.405699	0.155643	FALSE
Chr_1	2100725	2102950	+	2226	NCAS_0A10550	0.0818702	0.28496	FALSE	1.98257e-37	2.05688	TRUE	0.434265	0.203408	FALSE	0.564402	-0.114493	FALSE
Chr_1	2104067	2105185	+	1119	NCAS_0A10560	0.172787	0.226347	FALSE	1.40139e-23	1.58024	TRUE	0.999463	0.0017423	FALSE	0.153605	-0.218111	FALSE
Chr_1	2105372	2106049	-	678	NCAS_0A10570	0.00821817	0.521214	FALSE	2.48554e-19	1.8003	TRUE	0.17307	0.288824	FALSE	0.18717	-0.244586	FALSE
Chr_1	2106352	2107923	-	1572	NCAS_0A10580	0.13973	0.237471	FALSE	1.77557e-16	1.30282	TRUE	0.986218	-0.00999583	FALSE	0.906914	-0.0257182	FALSE
Chr_1	2108142	2111429	-	3288	NCAS_0A10590	0.33631	0.21282	FALSE	4.85193e-07	1.00906	TRUE	0.851295	-0.0819582	FALSE	0.281596	-0.20465	FALSE
Chr_1	2112154	2114019	+	1866	NCAS_0A10600	0.957213	-0.0129076	FALSE	2.17745e-06	0.754618	FALSE	0.860128	-0.0758289	FALSE	0.407095	-0.155827	FALSE
Chr_1	2114082	2114984	+	903	NCAS_0A10610	1.79023e-11	0.846538	FALSE	3.09526e-21	1.39774	TRUE	4.58328e-05	0.609655	FALSE	0.160596	0.232971	FALSE
Chr_1	2115434	2118691	-	3258	NCAS_0A10620	0.31338	-0.177232	FALSE	3.57522e-49	2.42082	TRUE	0.741005	-0.120669	FALSE	0.104489	-0.287914	FALSE
Chr_1	2119486	2120211	+	726	NCAS_0A10630	0.00762651	0.393252	FALSE	2.48001e-16	1.27649	TRUE	0.386628	0.214856	FALSE	0.458828	-0.141131	FALSE
Chr_1	2120321	2120860	-	540	NCAS_0A10640	0.769917	-0.0610193	FALSE	7.29857e-86	4.17865	TRUE	0.81369	-0.143305	FALSE	0.0682493	-0.481733	FALSE
Chr_1	2121866	2122747	-	882	NCAS_0A10650	0.163187	-0.282719	FALSE	9.27305e-63	3.08536	TRUE	3.53503e-05	-0.822559	FALSE	2.39643e-08	-1.10708	FALSE
Chr_1	2125106	2126107	+	1002	NCAS_0A10660	0.911542	-0.022256	FALSE	4.4516e-19	1.11293	TRUE	0.72695	-0.13218	FALSE	0.835663	-0.0472163	FALSE
Chr_1	2126351	2126683	-	333	NCAS_0A10670	0.0254685	0.540865	FALSE	1.25916e-07	1.31331	TRUE	0.0519465	0.449405	FALSE	0.0211011	0.485776	FALSE
Chr_1	2127039	2128820	-	1782	NCAS_0A10680	0.158807	-0.220123	FALSE	1.89412e-10	0.977942	FALSE	0.481304	-0.199535	FALSE	0.404755	-0.165267	FALSE
Chr_1	2130646	2131749	+	1104	NCAS_0A10690	0.646157	-0.0777013	FALSE	2.8722e-06	0.661091	FALSE	0.496058	-0.188261	FALSE	0.169998	-0.249019	FALSE
Chr_1	2132024	2133928	+	1905	NCAS_0A10700	0.00467744	0.502375	FALSE	4.80776e-10	1.18831	TRUE	0.0257912	0.398949	FALSE	0.670047	0.0867771	FALSE
Chr_1	2134128	2134757	-	630	NCAS_0A10710	0.121817	0.611767	FALSE	0.0118093	0.940185	FALSE	0.00187625	0.987976	FALSE	0.0201023	0.761282	FALSE
Chr_1	2135243	2135848	-	606	NCAS_0A10720	0.328114	0.275088	FALSE	0.0150781	0.586857	FALSE	0.180356	-0.307191	FALSE	0.00240241	-0.561941	FALSE
Chr_1	2136174	2136860	+	687	NCAS_0A10730	0.0144345	0.465323	FALSE	0.00128334	0.649034	FALSE	0.612174	0.160254	FALSE	0.569983	-0.115685	FALSE
Chr_1	2137004	2137750	-	747	NCAS_0A10740	0.679058	-0.0618085	FALSE	0.000924644	0.394184	FALSE	0.969493	0.0484272	FALSE	0.0151488	1.01868	TRUE
Chr_1	2138324	2139298	-	975	NCAS_0A10750	0.289927	0.252121	FALSE	7.83678e-21	1.89521	TRUE	0.850147	0.0814042	FALSE	0.632635	-0.0963924	FALSE
Chr_1	2140163	2141884	-	1722	NCAS_0A10760	0.733838	-0.0795114	FALSE	1.65946e-11	1.36142	TRUE	0.206245	-0.258381	FALSE	0.000290364	-0.57147	FALSE
Chr_1	2142376	2143197	-	822	NCAS_0A10770	0.516859	0.128357	FALSE	3.02646e-08	0.916042	FALSE	0.774703	-0.11833	FALSE	0.340575	-0.19321	FALSE
Chr_1	2144409	2145671	+	1263	NCAS_0A10780	0.0859102	0.297609	FALSE	3.13155e-15	1.38008	TRUE	0.155589	0.339844	FALSE	0.000400704	0.673092	FALSE
Chr_1	2146146	2149097	+	2952	NCAS_0A10790	0.00850706	0.433949	FALSE	8.15606e-12	1.19899	TRUE	0.130453	0.31945	FALSE	0.976222	0.00807453	FALSE
Chr_1	2150862	2151423	-	562	NCAS_0A10800	0.68699	0.0815607	FALSE	0.000997452	0.522387	FALSE	0.790692	-0.109475	FALSE	0.388002	-0.17144	FALSE
Chr_1	2152722	2153720	+	999	NCAS_0A10810	3.79179e-75	2.55063	TRUE	6.63364e-59	2.66762	TRUE	7.8821e-36	2.28538	TRUE	5.49567e-40	2.42657	TRUE
Chr_1	2155365	2156867	+	1503	NCAS_0A10820	0.00303781	0.497716	FALSE	8.26127e-18	1.56217	TRUE	0.845353	0.0896725	FALSE	0.6178	-0.107162	FALSE
Chr_1	2157393	2158101	-	709	NCAS_0A10830	0.993479	0.00232518	FALSE	1.61714e-07	0.743977	FALSE	0.949484	0.0482989	FALSE	0.127994	0.39293	FALSE
Chr_1	2158744	2159076	+	333	NCAS_0A10840	0.914942	-0.032151	FALSE	0.00112355	0.817661	FALSE	0.749528	-0.122028	FALSE	0.145872	-0.271746	FALSE
Chr_1	2159405	2160511	-	1107	NCAS_0A10850	0.69065	0.0814549	FALSE	4.18216e-51	2.29282	TRUE	0.829687	-0.084981	FALSE	0.510459	-0.122393	FALSE
Chr_1	2161841	2164444	+	2604	NCAS_0A10860	0.966213	0.0376153	FALSE	0.0259336	1.85388	TRUE	0.890554	0.410331	FALSE	0.532109	0.858908	FALSE
Chr_1	2164858	2165136	+	279	NCAS_0A10870	0.660947	0.0971996	FALSE	1.16234e-19	1.40998	TRUE	0.912002	-0.068076	FALSE	0.680898	0.109348	FALSE
Chr_1	2165561	2166487	+	927	NCAS_0A10880	0.021178	0.263198	FALSE	8.79656e-25	1.24902	TRUE	0.972928	0.0179459	FALSE	0.239341	0.228013	FALSE
Chr_1	2166759	2167877	-	1119	NCAS_0A10890	0.369202	0.26447	FALSE	2.1937e-12	1.65311	TRUE	0.861505	0.0806728	FALSE	0.503763	-0.137637	FALSE
Chr_1	2168266	2169402	-	1137	NCAS_0A10900	0.755855	0.0761736	FALSE	8.37421e-11	1.05274	TRUE	0.429289	-0.191345	FALSE	0.00126495	-0.505694	FALSE
Chr_1	2170059	2170967	+	909	NCAS_0A10910	0.92994	-0.0188442	FALSE	2.31923e-27	1.57733	TRUE	0.893304	-0.0636429	FALSE	0.868828	0.0367151	FALSE
Chr_1	2171372	2175973	+	4602	NCAS_0A10920	0.686528	-0.099866	FALSE	1.0188e-13	1.42769	TRUE	0.825529	-0.0866141	FALSE	9.41444e-05	-0.608375	FALSE
Chr_1	2176150	2178189	+	2040	NCAS_0A10930	0.295918	0.200827	FALSE	2.82783e-12	1.18134	TRUE	0.788581	0.102248	FALSE	0.266461	-0.198252	FALSE
Chr_1	2178281	2181088	-	2808	NCAS_0A10940	0.00932552	0.464745	FALSE	4.10783e-19	1.62682	TRUE	0.122506	0.301593	FALSE	0.917757	-0.0212662	FALSE
Chr_1	2181333	2184380	-	3048	NCAS_0A10950	0.0299917	0.323368	FALSE	1.04791e-25	1.59716	TRUE	0.740558	0.111585	FALSE	0.353972	-0.160672	FALSE
Chr_1	2184705	2185775	+	1071	NCAS_0A10960	0.0196102	0.362263	FALSE	1.88439e-20	1.47561	TRUE	0.762092	0.121016	FALSE	0.163146	-0.264447	FALSE
Chr_1	2185856	2186536	-	681	NCAS_0A10970	0.358443	0.199117	FALSE	1.4836e-11	1.22253	TRUE	0.944781	-0.0312782	FALSE	0.0588763	-0.300908	FALSE
Chr_1	2186907	2188289	+	1383	NCAS_0A10980	3.54228e-11	0.939897	FALSE	1.50177e-13	1.23809	TRUE	5.97615e-06	0.732768	FALSE	0.0596961	0.331669	FALSE
Chr_1	2188430	2191987	-	3558	NCAS_0A10990	0.442731	0.182786	FALSE	2.84367e-13	1.42063	TRUE	0.987252	-0.00824952	FALSE	0.0429845	-0.351859	FALSE
Chr_1	2192214	2192735	+	522	NCAS_0A11000	0.0794322	0.50743	FALSE	8.51578e-17	2.12612	TRUE	0.971259	0.0228915	FALSE	0.0381852	-0.468674	FALSE
Chr_1	2192885	2193190	-	306	NCAS_0A11010	0.400858	-0.150149	FALSE	0.0828719	0.286205	FALSE	0.846309	-0.12922	FALSE	0.351788	0.274474	FALSE
Chr_1	2193556	2194869	+	1314	NCAS_0A11020	0.103491	0.897137	FALSE	6.45209e-08	2.75103	TRUE	0.000415486	1.54606	TRUE	0.00284797	1.35918	TRUE
Chr_1	2195054	2198188	+	3135	NCAS_0A11030	0.851577	0.0499685	FALSE	2.81517e-28	1.83967	TRUE	0.797758	-0.0904372	FALSE	0.00280776	-0.446325	FALSE
Chr_1	2198599	2199615	+	1017	NCAS_0A11040	0.529642	0.11612	FALSE	1.35512e-35	1.83991	TRUE	0.819702	-0.102039	FALSE	0.0814358	-0.337768	FALSE
Chr_1	2199887	2200966	+	1080	NCAS_0A11050	5.25696e-15	1.14344	TRUE	6.86418e-14	1.30036	TRUE	7.50358e-09	1.03147	TRUE	1.07344e-06	0.887854	FALSE
Chr_1	2201278	2202198	+	921	NCAS_0A11060	0.503131	0.147896	FALSE	2.88817e-07	0.944348	FALSE	0.532073	0.208167	FALSE	0.0819481	0.357352	FALSE
Chr_1	2202311	2203087	-	777	NCAS_0A11070	0.00813621	0.408261	FALSE	1.17437e-12	1.16952	TRUE	0.470229	0.186405	FALSE	0.0931573	-0.285371	FALSE
Chr_1	2203317	2204174	-	858	NCAS_0A11080	4.63471e-27	2.40949	TRUE	0.000184675	1.06312	TRUE	1.8275e-41	2.3844	TRUE	6.55202e-32	2.11182	TRUE
Chr_1	2204649	2205113	+	465	NCAS_0A11090	0.310123	0.220371	FALSE	0.09584	0.333069	FALSE	0.805183	0.116282	FALSE	0.50968	0.152035	FALSE
Chr_1	2205301	2205782	-	482	NCAS_0A11100	0.54284	0.108244	FALSE	0.000659084	0.501024	FALSE	0.592215	-0.155389	FALSE	0.00189891	-0.499084	FALSE
Chr_1	2206040	2207038	-	999	NCAS_0A11110	0.127723	0.829274	FALSE	2.16494e-18	4.201	TRUE	0.00840937	1.37394	TRUE	0.191964	0.75686	FALSE
Chr_1	2209565	2210683	+	1119	NCAS_0A11120	0.478479	0.188015	FALSE	3.25614e-23	2.07788	TRUE	0.446737	-0.246314	FALSE	0.0221961	-0.486642	FALSE
Chr_1	2211202	2211771	+	570	NCAS_0A11130	0.548692	0.0976328	FALSE	0.000355548	0.484867	FALSE	0.81808	-0.0918949	FALSE	0.127471	-0.264986	FALSE
Chr_1	2212039	2212938	+	900	NCAS_0A11140	3.27275e-05	0.883505	FALSE	1.74628e-14	1.77263	TRUE	0.00195795	0.620119	FALSE	0.621716	0.1222	FALSE
Chr_1	2213090	2213647	+	558	NCAS_0A11150	1.21803e-05	0.860343	FALSE	6.79603e-10	1.37469	TRUE	2.10395e-05	0.830122	FALSE	0.074844	0.386289	FALSE
Chr_1	2214001	2215818	+	1818	NCAS_0A11160	0.0577267	0.405645	FALSE	1.32286e-09	1.29596	TRUE	0.794504	0.155737	FALSE	0.315695	0.278733	FALSE
Chr_1	2216013	2216459	-	447	NCAS_0A11170	4.24233e-07	0.903459	FALSE	1.16496e-20	1.84325	TRUE	3.00884e-06	0.766037	FALSE	0.112948	0.293951	FALSE
Chr_1	2216701	2218173	-	1473	NCAS_0A11180	5.08373e-08	0.88281	FALSE	2.48738e-21	1.75614	TRUE	9.88995e-07	0.873119	FALSE	6.63067e-05	0.729553	FALSE
Chr_1	2218374	2219972	+	1599	NCAS_0A11190	0.955824	0.0230363	FALSE	3.65502e-13	1.28569	TRUE	0.514868	-0.170128	FALSE	0.000615395	-0.53482	FALSE
Chr_1	2220419	2223142	-	2724	NCAS_0A11200	0.936262	-0.0211871	FALSE	1.43544e-06	0.987617	FALSE	0.300843	-0.240975	FALSE	0.361659	-0.173011	FALSE
Chr_1	2223815	2225563	+	1749	NCAS_0A11210	0.302629	-0.218343	FALSE	1.34565e-14	1.60022	TRUE	0.271879	-0.265374	FALSE	2.32587e-08	-0.944651	FALSE
Chr_1	2225713	2226201	-	489	NCAS_0A11220	1.95122e-07	0.71394	FALSE	7.0196e-13	1.12974	TRUE	0.000354775	0.662296	FALSE	1.50942e-05	0.783179	FALSE
Chr_1	2226556	2228598	-	2043	NCAS_0A11230	0.80799	0.0436746	FALSE	4.42515e-14	0.96753	FALSE	0.971259	-0.0397379	FALSE	0.0746238	0.682199	FALSE
Chr_1	2229067	2230203	-	1137	NCAS_0A11240	0.0768378	-0.317252	FALSE	7.64724e-12	1.24604	TRUE	0.78646	-0.146676	FALSE	0.90156	0.0396093	FALSE
Chr_1	2230984	2231970	-	987	NCAS_0A11250	3.63093e-05	2.02312	TRUE	9.64268e-12	3.3932	TRUE	1.81443e-11	2.16744	TRUE	4.11898e-06	1.59568	TRUE
Chr_1	2232933	2234309	+	1377	NCAS_0A11260	0.886582	-0.0309036	FALSE	0.000763103	0.482442	FALSE	0.942395	0.0833556	FALSE	0.0745377	0.721195	FALSE
Chr_1	2234644	2235078	-	435	NCAS_0A11270	0.910544	0.0399735	FALSE	3.58372e-26	1.98366	TRUE	0.825529	-0.0979003	FALSE	0.0012735	-0.592689	FALSE
Chr_1	2235314	2236795	-	1482	NCAS_0A11280	7.48231e-07	0.677213	FALSE	1.31918e-11	1.07246	TRUE	0.000664657	0.522104	FALSE	0.198652	0.213973	FALSE
Chr_1	2237429	2238631	+	1203	NCAS_0A11290	1.78687e-26	1.55958	TRUE	7.02047e-24	1.77231	TRUE	1.0013e-15	1.29077	TRUE	1.1945e-07	0.881162	FALSE
Chr_1	2238853	2240274	+	1422	NCAS_0A11300	0.158805	0.239391	FALSE	8.57184e-14	1.20217	TRUE	0.848048	-0.0893775	FALSE	0.0356131	-0.401742	FALSE
Chr_1	2240354	2241826	-	1473	NCAS_0A11310	2.94536e-16	1.27592	TRUE	2.34932e-26	1.95014	TRUE	3.16151e-14	1.1128	TRUE	1.82547e-07	0.791028	FALSE
Chr_1	2242018	2243169	-	1152	NCAS_0A11320	0.0403907	0.315124	FALSE	2.55685e-23	1.55026	TRUE	0.88466	0.067049	FALSE	0.706557	-0.0768006	FALSE
Chr_1	2243421	2246132	+	2712	NCAS_0A11330	0.192184	0.200283	FALSE	2.14443e-22	1.42408	TRUE	0.953239	-0.0285961	FALSE	0.0304916	-0.350117	FALSE
Chr_1	2246470	2248773	-	2304	NCAS_0A11340	0.824549	0.0501428	FALSE	2.25642e-20	1.40006	TRUE	0.926708	-0.0452894	FALSE	0.0624544	-0.320043	FALSE
Chr_1	2249991	2251277	-	1287	NCAS_0A11350	0.139311	0.348385	FALSE	1.71823e-09	1.28735	TRUE	0.129495	0.354925	FALSE	0.226592	0.256125	FALSE
Chr_1	2251542	2251868	+	327	NCAS_0A11360	0.659034	0.127798	FALSE	4.69439e-07	1.0168	TRUE	0.838179	0.11086	FALSE	0.692891	0.103111	FALSE
Chr_1	2251978	2255292	-	3315	NCAS_0A11370	2.67052e-05	0.615442	FALSE	4.30667e-17	1.39641	TRUE	0.0322716	0.424138	FALSE	0.126489	0.293773	FALSE
Chr_1	2255650	2258805	+	3156	NCAS_0A11380	0.338145	0.172921	FALSE	1.44213e-32	1.92003	TRUE	0.703718	-0.125534	FALSE	0.000596098	-0.542037	FALSE
Chr_1	2259166	2259885	+	720	NCAS_0A11390	0.950779	0.0243195	FALSE	1.78991e-08	1.01005	TRUE	0.363485	-0.204009	FALSE	0.015636	-0.379651	FALSE
Chr_1	2260045	2260629	-	585	NCAS_0A11400	0.00519484	0.505734	FALSE	1.33142e-15	1.59036	TRUE	0.836093	-0.0950244	FALSE	0.140086	-0.294575	FALSE
Chr_1	2260837	2261259	+	423	NCAS_0A11410	0.372636	0.189412	FALSE	8.86129e-06	0.806126	FALSE	0.764043	-0.110572	FALSE	2.82427e-05	-0.670081	FALSE
Chr_1	2261836	2262450	+	615	NCAS_0A11420	0.0253975	0.483567	FALSE	1.72151e-21	1.9448	TRUE	0.408086	0.225445	FALSE	0.141992	-0.282832	FALSE
Chr_1	2262644	2263171	-	528	NCAS_0A11430	0.864202	-0.0463405	FALSE	0.00918562	0.487171	FALSE	0.781598	-0.122911	FALSE	0.845455	-0.0481183	FALSE
Chr_1	2263605	2264468	+	864	NCAS_0A11440	0.88409	0.0339852	FALSE	7.85233e-05	0.590526	FALSE	0.645724	-0.144259	FALSE	0.133805	-0.262262	FALSE
Chr_1	2264659	2267658	-	3000	NCAS_0A11450	0.575035	0.125832	FALSE	2.48933e-23	1.75084	TRUE	0.965221	0.026003	FALSE	0.487347	0.152169	FALSE
Chr_1	2268077	2270689	-	2613	NCAS_0A11460	0.536284	0.130942	FALSE	1.35174e-27	1.8634	TRUE	0.787121	-0.11066	FALSE	0.00037025	-0.616716	FALSE
Chr_1	2271014	2271976	-	963	NCAS_0A11470	1.37033e-47	1.84021	TRUE	1.35237e-29	1.74632	TRUE	1.58581e-28	1.79646	TRUE	5.59757e-26	1.7173	TRUE
Chr_1	2272174	2272821	-	648	NCAS_0A11480	4.91916e-40	1.84056	TRUE	2.18834e-27	1.82745	TRUE	2.95031e-22	2.06725	TRUE	4.87403e-42	2.86886	TRUE
Chr_1	2272999	2274243	+	1245	NCAS_0A11490	0.944118	-0.0189986	FALSE	0.00114329	0.675189	FALSE	0.687126	-0.12239	FALSE	0.00267831	-0.450378	FALSE
Chr_1	2274436	2276280	-	1845	NCAS_0A11500	6.18969e-08	0.888503	FALSE	1.63987e-22	1.85386	TRUE	0.0613168	0.435705	FALSE	0.0214656	0.481244	FALSE
Chr_1	2278685	2279617	+	933	NCAS_0A11510	0.00282215	0.506491	FALSE	2.65488e-17	1.53218	TRUE	0.592604	0.169757	FALSE	0.610404	-0.106717	FALSE
Chr_1	2279808	2280815	-	1008	NCAS_0A11520	0.958246	0.0196454	FALSE	1.14309e-09	1.20874	TRUE	0.682972	-0.119428	FALSE	0.00224245	-0.443398	FALSE
Chr_1	2281835	2283223	+	1389	NCAS_0A11530	0.890006	-0.0256106	FALSE	1.3997e-31	2.05398	TRUE	0.667313	-0.138236	FALSE	0.00027811	-0.587444	FALSE
Chr_1	2283352	2285961	-	2610	NCAS_0A11540	0.673366	-0.124032	FALSE	4.57319e-09	1.44517	TRUE	0.969417	-0.017202	FALSE	0.0136032	-0.367706	FALSE
Chr_1	2286481	2289666	+	3186	NCAS_0A11550	0.458168	-0.167453	FALSE	0.000132534	0.762763	FALSE	0.965412	-0.0216846	FALSE	0.614474	-0.0997182	FALSE
Chr_1	2290073	2290738	+	666	NCAS_0A11560	0.403765	0.135249	FALSE	6.75026e-11	0.931289	FALSE	0.283972	-0.215766	FALSE	0.0101456	-0.383543	FALSE
Chr_1	2291116	2292090	+	975	NCAS_0A11570	0.581269	0.112246	FALSE	2.25702e-16	1.34305	TRUE	0.365413	-0.204641	FALSE	0.0232234	-0.359568	FALSE
Chr_1	2292368	2293210	+	843	NCAS_0A11580	1.33512e-11	1.07269	TRUE	1.53909e-21	1.7569	TRUE	3.56132e-09	1.02659	TRUE	1.40928e-05	0.781403	FALSE
Chr_1	2294386	2301822	+	7437	NCAS_0A11590	8.33805e-28	1.43759	TRUE	5.01505e-29	1.78082	TRUE	2.15466e-23	1.5255	TRUE	5.26575e-16	1.25516	TRUE
Chr_1	2302437	2303684	+	1248	NCAS_0A11600	9.92232e-06	0.648626	FALSE	6.37348e-22	1.60261	TRUE	0.0100507	0.529595	FALSE	0.00475174	0.554847	FALSE
Chr_1	2305138	2306358	+	1221	NCAS_0A11610	0.0715427	0.367648	FALSE	9.75737e-12	1.31028	TRUE	0.850147	0.0876776	FALSE	0.860582	-0.0385619	FALSE
Chr_1	2306720	2308159	-	1440	NCAS_0A11620	0.111292	0.245954	FALSE	3.0385e-41	2.00438	TRUE	0.77111	-0.0968531	FALSE	4.95764e-05	-0.579427	FALSE
Chr_1	2311038	2314643	+	3606	NCAS_0A11630	3.88433e-10	0.921499	FALSE	5.55218e-15	1.35691	TRUE	0.000181918	0.58287	FALSE	0.49648	0.12505	FALSE
Chr_1	2315022	2316227	+	1206	NCAS_0A11640	0.9959	-0.00257775	FALSE	5.58961e-05	1.21514	TRUE	0.563507	0.19847	FALSE	0.461566	-0.16606	FALSE
Chr_1	2316596	2320939	+	4344	NCAS_0A11650	0.81557	-0.0495056	FALSE	3.99957e-10	0.977793	FALSE	0.603285	-0.150361	FALSE	0.00083087	-0.522423	FALSE
Chr_1	2321294	2322625	+	1332	NCAS_0A11660	0.215943	0.20645	FALSE	8.82791e-17	1.28234	TRUE	0.994395	0.00535124	FALSE	0.102111	-0.298549	FALSE
Chr_1	2323467	2324513	+	1047	NCAS_0A11670	1.65984e-11	0.941827	FALSE	8.65509e-49	2.34944	TRUE	2.91986e-05	0.735419	FALSE	2.83834e-05	0.737208	FALSE
Chr_1	2325829	2326800	-	972	NCAS_0A11680	0.229281	0.34844	FALSE	7.37118e-22	2.26356	TRUE	0.987015	-0.00979828	FALSE	0.803316	-0.0577382	FALSE
Chr_1	2327302	2327889	-	588	NCAS_0A11690	0.339085	0.188103	FALSE	1.92965e-16	1.39753	TRUE	0.900168	0.065162	FALSE	0.182888	-0.256732	FALSE
Chr_1	2328293	2329084	+	792	NCAS_0A11700	0.913071	-0.0303325	FALSE	0.00403705	0.508682	FALSE	0.689094	-0.138817	FALSE	0.258305	-0.211641	FALSE
Chr_1	2329335	2330624	-	1290	NCAS_0A11710	0.322327	-0.157602	FALSE	4.00672e-14	1.10928	TRUE	0.320304	-0.24465	FALSE	0.00488567	-0.495073	FALSE
Chr_1	2330869	2331021	+	153	NCAS_0A11720	0.168495	-0.189355	FALSE	1.28818e-05	0.588488	FALSE	0.956821	0.0373681	FALSE	0.886282	-0.0398411	FALSE
Chr_1	2331191	2332018	+	828	NCAS_0A11730	0.000875409	0.588233	FALSE	3.87441e-43	2.50694	TRUE	0.10287	0.396024	FALSE	0.4269	0.190877	FALSE
Chr_1	2332571	2335345	+	2775	NCAS_0A11740	0.690095	0.106735	FALSE	2.43764e-05	0.83446	FALSE	0.607623	0.170255	FALSE	0.812668	0.0548183	FALSE
Chr_1	2335605	2337320	+	1716	NCAS_0A11750	0.908289	-0.0372916	FALSE	2.71652e-08	1.30089	TRUE	0.782416	-0.108391	FALSE	0.0496641	-0.344785	FALSE
Chr_1	2338135	2339604	-	1470	NCAS_0A11760	0.971731	0.0209206	FALSE	4.7554e-17	1.45521	TRUE	0.922843	0.055671	FALSE	0.32512	0.208129	FALSE
Chr_1	2340622	2341641	-	1020	NCAS_0A11770	0.0836478	1.46562	FALSE	4.3108e-05	3.44907	TRUE	0.973232	-0.129688	FALSE	0.714258	-0.578623	FALSE
Chr_1	2342193	2342423	+	231	NCAS_0A11780	0.402598	0.268846	FALSE	1.05924e-09	1.46288	TRUE	0.916525	0.0756676	FALSE	0.936611	-0.0258937	FALSE
Chr_1	2342656	2344131	+	1476	NCAS_0A11790	0.00986957	0.495224	FALSE	2.92508e-13	1.43824	TRUE	0.0573291	0.341319	FALSE	0.662667	-0.084514	FALSE
Chr_1	2344377	2344688	+	312	NCAS_0A11800	0.0117842	0.37045	FALSE	8.44908e-05	0.622346	FALSE	0.852967	0.0815295	FALSE	0.9095	-0.0247623	FALSE
Chr_1	2344889	2345140	-	252	NCAS_0A11810	0.961775	-0.00860566	FALSE	0.249073	0.231704	FALSE	0.28493	-0.249591	FALSE	1.32433e-05	-0.72286	FALSE
Chr_1	2346078	2346317	-	240	NCAS_0A11820	9.32768e-11	1.13785	TRUE	3.30853e-17	1.68018	TRUE	4.07083e-08	1.06164	TRUE	0.0523849	0.423147	FALSE
Chr_1	2347016	2348929	+	1914	NCAS_0A11830	8.0833e-22	1.70501	TRUE	1.82236e-168	5.2572	TRUE	7.08175e-22	1.50858	TRUE	8.82381e-14	1.20557	TRUE
Chr_1	2349268	2350700	+	1433	NCAS_0A11840	0.453328	0.112582	FALSE	1.66326e-14	1.00015	TRUE	0.839113	-0.0739527	FALSE	0.0529944	-0.291007	FALSE
Chr_1	2350919	2351345	-	427	NCAS_0A11850	0.00147217	0.580912	FALSE	6.48317e-07	1.00786	TRUE	0.764701	0.115632	FALSE	0.2887	-0.202135	FALSE
Chr_1	2351868	2352746	-	879	NCAS_0A11860	0.402781	0.209702	FALSE	3.40617e-36	2.55681	TRUE	0.919946	-0.0506556	FALSE	0.0205246	-0.403979	FALSE
Chr_1	2353408	2353743	+	336	NCAS_0A11870	0.746934	-0.074162	FALSE	1.76432e-08	0.976252	FALSE	0.258199	-0.258753	FALSE	1.1265e-05	0.720828	FALSE
Chr_1	2354581	2355417	-	837	NCAS_0A11880	0.422687	0.162322	FALSE	2.13662e-19	1.59162	TRUE	0.829687	-0.0856611	FALSE	0.150084	-0.247842	FALSE
Chr_1	2356660	2359188	+	2529	NCAS_0A11890	0.902845	-0.0294565	FALSE	1.66029e-05	0.670929	FALSE	0.990074	-0.00978447	FALSE	0.076728	0.437917	FALSE
Chr_1	2359555	2361423	+	1869	NCAS_0A11900	0.0172777	0.609469	FALSE	1.24709e-07	1.35865	TRUE	0.000552158	0.575469	FALSE	0.404591	0.160578	FALSE
Chr_1	2361519	2363180	-	1662	NCAS_0A11910	1.37864e-08	0.916369	FALSE	7.04863e-23	1.83768	TRUE	0.260987	0.265153	FALSE	0.00510364	0.493219	FALSE
Chr_1	2363750	2365141	+	1392	NCAS_0A11920	0.405416	-0.171583	FALSE	3.05333e-06	0.849972	FALSE	0.712915	-0.120509	FALSE	0.992365	-0.00197973	FALSE
Chr_1	2365648	2367612	+	1965	NCAS_0A11930	0.914006	0.0375819	FALSE	1.57057e-15	1.52101	TRUE	0.57679	-0.165526	FALSE	0.0158378	-0.411766	FALSE
Chr_1	2367787	2369658	-	1872	NCAS_0A11940	0.120303	0.236387	FALSE	8.58011e-22	1.40348	TRUE	0.940591	0.0369834	FALSE	0.246067	-0.201495	FALSE
Chr_1	2370391	2371392	+	1002	NCAS_0A11950	0.79925	0.0877362	FALSE	4.29283e-26	1.99009	TRUE	0.738421	0.132167	FALSE	0.524394	-0.134686	FALSE
Chr_1	2371549	2372361	-	813	NCAS_0A11960	0.850034	0.0960365	FALSE	0.000312533	1.23781	TRUE	0.999463	-0.0015692	FALSE	0.399774	-0.15584	FALSE
Chr_1	2373050	2374366	+	1317	NCAS_0A11970	1.3569e-06	0.872084	FALSE	1.11214e-16	1.69417	TRUE	2.58596e-06	0.72097	FALSE	0.301768	0.185274	FALSE
Chr_1	2374708	2375988	+	1281	NCAS_0A11980	0.618438	-0.0881168	FALSE	4.86894e-12	1.02883	TRUE	0.86616	-0.0781256	FALSE	0.361666	-0.182659	FALSE
Chr_1	2376413	2379247	+	2835	NCAS_0A11990	0.93525	0.025297	FALSE	3.01694e-11	1.19208	TRUE	0.898785	-0.0555996	FALSE	0.054237	-0.304994	FALSE
Chr_1	2379695	2380342	+	648	NCAS_0A12000	0.998161	0.00155904	FALSE	0.00134314	1.02112	TRUE	0.836546	-0.0811504	FALSE	0.453033	0.13542	FALSE
Chr_1	2380758	2381771	+	1014	NCAS_0A12010	0.125784	0.312327	FALSE	3.06835e-16	1.55432	TRUE	0.461827	0.212845	FALSE	0.240312	0.233958	FALSE
Chr_1	2382032	2383510	-	1479	NCAS_0A12020	0.0110475	0.848145	FALSE	5.01432e-26	3.39107	TRUE	0.00454525	1.13753	TRUE	0.00823047	1.06269	TRUE
Chr_1	2384473	2386122	+	1650	NCAS_0A12030	1.72063e-85	3.0189	TRUE	9.52562e-40	2.46395	TRUE	3.55085e-77	2.78782	TRUE	1.00328e-55	2.37455	TRUE
Chr_1	2386247	2386762	-	516	NCAS_0A12040	0.682756	-0.107415	FALSE	9.75183e-07	1.13683	TRUE	0.924734	-0.0529119	FALSE	0.85725	0.0460299	FALSE
Chr_1	2387129	2387863	+	735	NCAS_0A12050	0.566483	-0.130483	FALSE	2.11826e-14	1.39187	TRUE	0.95837	0.0728206	FALSE	0.00955466	1.13024	TRUE
Chr_1	2388467	2393098	+	4632	NCAS_0A12060	0.0253975	0.417077	FALSE	1.04349e-19	1.78653	TRUE	0.0256445	0.407149	FALSE	0.0656473	0.322651	FALSE
Chr_1	2393735	2397511	-	3777	NCAS_0A12070	0.688069	0.0803111	FALSE	2.39881e-25	1.54363	TRUE	0.862029	-0.0657624	FALSE	0.00898004	-0.385858	FALSE
Chr_1	2398182	2398823	+	642	NCAS_0A12080	0.788489	-0.169931	FALSE	0.00388149	1.33109	TRUE	0.809597	-0.145486	FALSE	0.0050426	0.709942	FALSE
Chr_1	2399138	2401273	+	2136	NCAS_0A12090	0.539405	0.14466	FALSE	2.20837e-25	1.81024	TRUE	0.997335	0.00420986	FALSE	0.307779	-0.208847	FALSE
Chr_1	2401427	2402164	-	738	NCAS_0A12100	0.738549	0.0935722	FALSE	5.39845e-20	1.85205	TRUE	0.515983	-0.174229	FALSE	0.109626	-0.273694	FALSE
Chr_1	2402453	2403487	-	1035	NCAS_0A12110	0.115905	0.234304	FALSE	3.61431e-11	0.966289	FALSE	0.852967	0.0980393	FALSE	0.92178	0.0267503	FALSE
Chr_1	2403743	2404462	+	720	NCAS_0A12120	0.844735	0.0930386	FALSE	0.0504284	0.617865	FALSE	0.940591	0.0387167	FALSE	0.387462	-0.165533	FALSE
Chr_1	2404599	2405660	-	1062	NCAS_0A12130	0.969435	-0.00709474	FALSE	2.5216e-16	1.06065	TRUE	0.241506	-0.277891	FALSE	0.00407135	-0.516301	FALSE
Chr_1	2405956	2407107	-	1152	NCAS_0A12140	0.045179	0.321487	FALSE	5.41552e-15	1.28427	TRUE	0.8778	0.0755533	FALSE	0.990541	0.00397562	FALSE
Chr_1	2407433	2408233	-	801	NCAS_0A12150	0.648798	-0.104744	FALSE	0.00164687	0.62161	FALSE	0.345863	-0.2355	FALSE	0.0104141	-0.451109	FALSE
Chr_1	2408461	2411037	+	2577	NCAS_0A12160	0.000325214	0.58673	FALSE	3.83987e-26	1.90979	TRUE	0.0252875	0.410475	FALSE	0.705411	0.0796759	FALSE
Chr_1	2411493	2411990	+	498	NCAS_0A12170	0.775761	-0.0502715	FALSE	5.32053e-06	0.597483	FALSE	0.785577	-0.117235	FALSE	0.502516	0.144095	FALSE
Chr_1	2413240	2415150	+	1911	NCAS_0A12180	3.14239e-10	1.06694	TRUE	9.14699e-17	1.64213	TRUE	5.55055e-10	0.970395	FALSE	8.0666e-06	0.721474	FALSE
Chr_1	2415445	2415786	+	342	NCAS_0A12190	2.92705e-08	1.45084	TRUE	4.04734e-12	1.99939	TRUE	1.13137e-06	1.01029	TRUE	0.00709409	0.600687	FALSE
Chr_1	2417539	2419782	+	2244	NCAS_0A12200	0.307224	0.179583	FALSE	1.71686e-11	1.08233	TRUE	0.78707	-0.113266	FALSE	0.0789164	-0.331043	FALSE
Chr_1	2420135	2421028	+	894	NCAS_0A12210	6.85232e-20	1.43633	TRUE	2.8225e-13	1.37678	TRUE	4.25336e-15	1.40148	TRUE	1.61381e-11	1.21997	TRUE
Chr_1	2421421	2424180	+	2760	NCAS_0A12220	0.00018022	0.563961	FALSE	4.31575e-30	1.92504	TRUE	0.0143036	0.366641	FALSE	0.459007	0.120174	FALSE
Chr_1	2424277	2425527	-	1251	NCAS_0A12230	0.0620335	0.408402	FALSE	1.77943e-18	1.83434	TRUE	0.632352	0.147417	FALSE	0.699843	-0.0763013	FALSE
Chr_1	2425723	2426151	+	429	NCAS_0A12240	1.00487e-30	2.38186	TRUE	3.28591e-23	2.38332	TRUE	4.93624e-16	1.90955	TRUE	1.42356e-14	1.83142	TRUE
Chr_1	2426892	2428556	+	1665	NCAS_0A12260	0.88409	0.032557	FALSE	2.47658e-11	0.94274	FALSE	0.788581	-0.106665	FALSE	0.135437	-0.270692	FALSE
Chr_1	2428834	2430198	-	1365	NCAS_0A12270	0.616175	0.0836305	FALSE	1.60782e-13	0.998557	FALSE	0.846309	-0.0824771	FALSE	0.980139	0.00613551	FALSE
Chr_1	2430482	2437726	+	7245	NCAS_0A12280	0.741869	0.0740037	FALSE	1.32643e-15	1.29575	TRUE	0.737261	0.126763	FALSE	0.587061	-0.1127	FALSE
Chr_1	2437785	2438216	-	432	NCAS_0A12290	0.329981	0.227412	FALSE	0.00077836	0.692939	FALSE	0.88982	0.0741677	FALSE	0.771639	-0.0696668	FALSE
Chr_1	2438482	2439534	+	1053	NCAS_0A12300	0.514025	0.121248	FALSE	1.47052e-18	1.36024	TRUE	0.969493	0.0214153	FALSE	0.670371	-0.0932343	FALSE
Chr_1	2439731	2441698	-	1968	NCAS_0A12310	0.712382	0.0887744	FALSE	2.31475e-09	1.07317	TRUE	0.495822	-0.205865	FALSE	0.513209	-0.141474	FALSE
Chr_1	2442237	2443142	+	906	NCAS_0A12320	0.283931	0.227244	FALSE	2.93803e-16	1.57394	TRUE	0.352355	-0.218227	FALSE	9.5925e-06	-0.694901	FALSE
Chr_1	2443547	2444221	-	675	NCAS_0A12330	1.11647e-12	0.907448	FALSE	3.43629e-20	1.38815	TRUE	6.34126e-09	0.939913	FALSE	2.08835e-09	0.972299	FALSE
Chr_1	2444725	2445951	+	1227	NCAS_0A12340	0.44997	0.241309	FALSE	9.91336e-12	1.54918	TRUE	0.973942	0.0177435	FALSE	0.476463	-0.139612	FALSE
Chr_1	2446237	2448559	-	2323	NCAS_0A12350	0.841091	0.168484	FALSE	1.27087e-17	2.72465	TRUE	0.551322	0.386542	FALSE	0.55138	0.278078	FALSE
Chr_1	2449093	2449812	+	720	NCAS_0A12360	0.973705	-0.0108564	FALSE	0.00533093	0.66785	FALSE	0.829687	-0.0860239	FALSE	0.103163	-0.278207	FALSE
Chr_1	2449881	2450426	-	546	NCAS_0A12370	1.82179e-32	1.80014	TRUE	1.51534e-22	1.77929	TRUE	6.37531e-26	1.60833	TRUE	2.83329e-14	1.18789	TRUE
Chr_1	2450581	2451876	+	1296	NCAS_0A12380	0.170612	0.223865	FALSE	1.046e-16	1.30984	TRUE	0.83533	0.118466	FALSE	0.0560432	0.45031	FALSE
Chr_1	2452135	2453079	+	945	NCAS_0A12390	0.24863	0.151934	FALSE	4.52402e-12	0.853589	FALSE	0.772547	0.152222	FALSE	0.00878716	0.607641	FALSE
Chr_1	2453429	2455318	+	1890	NCAS_0A12400	0.121261	0.246893	FALSE	5.15609e-25	1.55409	TRUE	0.831097	0.0941831	FALSE	0.49648	-0.139543	FALSE
Chr_1	2455437	2456630	-	1194	NCAS_0A12410	0.666738	0.102873	FALSE	3.08846e-09	1.04948	TRUE	0.986292	-0.0102122	FALSE	0.0471773	-0.365741	FALSE
Chr_1	2456768	2457355	-	588	NCAS_0A12420	0.77916	0.0607624	FALSE	6.27603e-07	0.820426	FALSE	0.858303	0.23655	FALSE	0.00612425	1.4089	TRUE
Chr_1	2457499	2457930	+	432	NCAS_0A12430	0.667363	-0.170421	FALSE	0.0404171	0.645376	FALSE	0.905002	0.249736	FALSE	2.75326e-06	3.19606	TRUE
Chr_1	2457962	2459377	+	1416	NCAS_0A12440	0.478938	0.149557	FALSE	1.33889e-11	1.26442	TRUE	0.984674	0.0240443	FALSE	0.000893179	1.02319	TRUE
Chr_1	2459574	2460878	+	1305	NCAS_0A12450	0.825606	0.0664282	FALSE	1.93831e-07	1.06756	TRUE	0.717728	0.159281	FALSE	0.117534	0.345262	FALSE
Chr_1	2461028	2462650	-	1623	NCAS_0A12460	5.8148e-16	1.44675	TRUE	4.19492e-60	3.17929	TRUE	1.3878e-09	1.18461	TRUE	2.61279e-09	1.18027	TRUE
Chr_1	2463102	2463728	-	627	NCAS_0A12470	0.923508	0.0259792	FALSE	0.00106876	0.598033	FALSE	0.874893	0.0739019	FALSE	0.00111711	0.563286	FALSE
Chr_1	2464045	2466714	+	2670	NCAS_0A12480	0.00750186	0.452531	FALSE	1.97936e-44	2.47874	TRUE	0.284035	0.284757	FALSE	0.716012	-0.0855559	FALSE
Chr_1	2466981	2468166	-	1186	NCAS_0A12490	0.816024	-0.0417091	FALSE	2.28836e-09	0.770331	FALSE	0.909968	0.182549	FALSE	0.033559	1.21046	TRUE
Chr_1	2468616	2468807	-	192	NCAS_0A12500	0.908396	0.0242517	FALSE	2.77431e-08	0.716233	FALSE	0.839146	-0.104026	FALSE	0.0574448	0.402826	FALSE
Chr_1	2469565	2470356	+	792	NCAS_0A12510	0.762856	0.143134	FALSE	5.86707e-08	1.9571	TRUE	0.825108	-0.0860553	FALSE	0.490359	0.126124	FALSE
Chr_1	2470598	2471896	-	1299	NCAS_0A12520	0.823059	-0.0436507	FALSE	7.09596e-19	1.30274	TRUE	0.999463	-0.0009429	FALSE	0.932391	-0.0191902	FALSE
Chr_1	2472725	2473639	+	915	NCAS_0A12530	0.393306	-0.175167	FALSE	2.28506e-19	1.69918	TRUE	0.81808	0.119792	FALSE	0.0513533	0.423771	FALSE
Chr_1	2473887	2475839	-	1953	NCAS_0A12540	0.399789	0.186802	FALSE	5.04827e-13	1.3587	TRUE	0.77623	0.131095	FALSE	0.663549	0.106502	FALSE
Chr_1	2476209	2477927	+	1719	NCAS_0A12550	0.088618	0.396473	FALSE	5.64098e-21	1.99533	TRUE	0.987252	0.0136979	FALSE	0.514169	-0.181948	FALSE
Chr_1	2478225	2479187	+	963	NCAS_0A12560	0.951367	0.0188359	FALSE	2.35e-16	1.35807	TRUE	0.940591	0.0471481	FALSE	0.0397244	0.432186	FALSE
Chr_1	2479404	2480912	-	1509	NCAS_0A12570	0.622686	-0.0916288	FALSE	1.09966e-10	0.980041	FALSE	0.0446049	-0.36706	FALSE	8.71139e-06	-0.70242	FALSE
Chr_1	2481447	2483561	-	2115	NCAS_0A12580	1.42268e-15	2.49612	TRUE	2.78431e-31	3.80327	TRUE	5.97802e-20	2.22035	TRUE	2.20444e-21	2.33668	TRUE
Chr_1	2484051	2484929	+	879	NCAS_0A12590	0.884358	0.071884	FALSE	7.51905e-12	1.37986	TRUE	0.377854	-0.232366	FALSE	2.46984e-05	-0.737448	FALSE
Chr_1	2485071	2486309	+	1239	NCAS_0A12600	1.3766e-11	1.17299	TRUE	3.11001e-22	1.91306	TRUE	1.82493e-08	0.981261	FALSE	0.00280776	0.55832	FALSE
Chr_1	2487158	2487517	-	360	NCAS_0A12610	0.539405	0.0987806	FALSE	9.1437e-07	0.670792	FALSE	0.673749	-0.138713	FALSE	0.0668516	-0.315843	FALSE
Chr_1	2488441	2490657	+	2217	NCAS_0A12620	7.94459e-18	1.71008	TRUE	4.39719e-52	3.40106	TRUE	1.13417e-26	1.65849	TRUE	1.3027e-27	1.70339	TRUE
Chr_1	2490998	2491798	+	801	NCAS_0A12630	0.0202576	0.339176	FALSE	1.13715e-21	1.44247	TRUE	0.839754	0.0898227	FALSE	0.413621	-0.161684	FALSE
Chr_1	2491832	2492173	-	342	NCAS_0A12640	0.822766	-0.0749301	FALSE	3.54431e-08	1.05524	TRUE	0.912693	-0.066093	FALSE	0.170008	-0.310528	FALSE
Chr_1	2492345	2494111	+	1767	NCAS_0A12650	0.906484	-0.0229612	FALSE	8.01245e-23	1.63561	TRUE	0.943627	-0.036361	FALSE	0.0941354	-0.309308	FALSE
Chr_1	2494510	2495694	+	1185	NCAS_0A12660	0.223205	-0.235021	FALSE	6.92061e-33	2.19817	TRUE	0.294689	0.259874	FALSE	0.270573	-0.217529	FALSE
Chr_1	2496486	2500331	+	3846	NCAS_0A12670	0.448052	0.129575	FALSE	2.26502e-06	0.707269	FALSE	0.678483	-0.12562	FALSE	0.0140702	-0.377122	FALSE
Chr_1	2500462	2501748	-	1287	NCAS_0A12680	0.205309	0.22525	FALSE	1.15139e-22	1.60331	TRUE	0.433591	-0.181634	FALSE	0.019777	-0.357547	FALSE
Chr_1	2504022	2505434	+	1413	NCAS_0A12690	0.523342	0.18966	FALSE	2.55484e-13	1.69536	TRUE	0.847725	-0.0793008	FALSE	0.118212	-0.269533	FALSE
Chr_1	2505648	2507219	-	1572	NCAS_0A12700	0.548851	0.112289	FALSE	1.15626e-34	1.92506	TRUE	0.940058	-0.0350239	FALSE	0.145872	-0.23266	FALSE
Chr_1	2507851	2510028	-	2178	NCAS_0A12710	0.467263	-0.195143	FALSE	0.00144569	0.864996	FALSE	0.905577	0.0843066	FALSE	0.416036	0.218567	FALSE
Chr_1	2510574	2512853	+	2280	NCAS_0A12720	1.44418e-11	0.995258	FALSE	8.45975e-38	2.16305	TRUE	0.0011898	0.564005	FALSE	0.49613	0.138573	FALSE
Chr_1	2513595	2515253	+	1659	NCAS_0A12730	0.691836	0.11017	FALSE	4.33656e-24	1.81956	TRUE	0.252354	-0.257941	FALSE	0.00409656	-0.495744	FALSE
Chr_1	2515651	2516148	+	498	NCAS_0A12740	0.0738922	0.246408	FALSE	2.00449e-24	1.42657	TRUE	0.772547	-0.123039	FALSE	0.690963	-0.0913792	FALSE
Chr_1	2516616	2517959	+	1344	NCAS_0A12750	0.164452	-0.474425	FALSE	5.83135e-48	3.47	TRUE	0.262594	-0.548638	FALSE	0.0294913	-0.85654	FALSE
Chr_1	2518071	2519570	-	1500	NCAS_0A12760	0.00882436	0.478129	FALSE	6.49405e-10	1.18318	TRUE	0.266436	0.264009	FALSE	0.191846	-0.250176	FALSE
Chr_1	2520186	2521307	+	1122	NCAS_0A12770	0.173441	0.213088	FALSE	1.3188e-14	1.15002	TRUE	0.928681	0.0434531	FALSE	0.701701	-0.0759239	FALSE
Chr_1	2521600	2522445	+	846	NCAS_0A12780	9.76419e-19	1.64665	TRUE	1.52794e-14	1.70599	TRUE	4.18675e-25	1.57745	TRUE	5.87557e-14	1.17148	TRUE
Chr_1	2522505	2523707	-	1203	NCAS_0A12790	0.0287105	0.322738	FALSE	7.53657e-41	1.94034	TRUE	0.928286	-0.0410276	FALSE	0.6	-0.0990699	FALSE
Chr_1	2524081	2525475	+	1395	NCAS_0A12800	0.901463	0.0300915	FALSE	3.26354e-15	1.16127	TRUE	0.564726	-0.152436	FALSE	0.580904	-0.100075	FALSE
Chr_1	2525756	2526880	+	1125	NCAS_0A12810	0.294976	0.220454	FALSE	7.49924e-15	1.39152	TRUE	0.642486	0.165068	FALSE	0.950038	-0.0145753	FALSE
Chr_1	2527046	2530141	-	3096	NCAS_0A12820	0.635984	0.0894498	FALSE	1.17842e-26	1.61643	TRUE	0.725053	-0.124314	FALSE	0.00307572	-0.49057	FALSE
Chr_1	2530438	2532084	-	1647	NCAS_0A12830	2.25594e-06	0.69163	FALSE	2.09309e-16	1.38027	TRUE	0.00850198	0.454852	FALSE	0.325419	0.181669	FALSE
Chr_1	2532530	2534368	-	1839	NCAS_0A12840	0.786968	-0.0541912	FALSE	0.00145216	0.472517	FALSE	0.862031	-0.0849808	FALSE	0.972672	-0.00936709	FALSE
Chr_1	2534879	2535844	+	966	NCAS_0A12850	0.000403439	0.548874	FALSE	6.9452e-19	1.53961	TRUE	0.226668	0.264541	FALSE	0.0113406	0.428114	FALSE
Chr_1	2536095	2538725	-	2631	NCAS_0A12860	0.198851	0.210418	FALSE	1.84506e-23	1.52357	TRUE	0.88315	0.0764876	FALSE	0.659207	-0.101693	FALSE
Chr_1	2539303	2541315	+	2013	NCAS_0A12870	0.554164	-0.129944	FALSE	4.46361e-20	1.83251	TRUE	0.997177	0.00399119	FALSE	0.00651358	-0.470572	FALSE
Chr_1	2541528	2542817	-	1290	NCAS_0A12880	7.67655e-20	1.43846	TRUE	5.61941e-39	2.41465	TRUE	6.01073e-13	1.17998	TRUE	3.34515e-12	1.15064	TRUE
Chr_1	2543442	2543948	+	507	NCAS_0A12890	0.0208528	0.48358	FALSE	4.06856e-09	1.28576	TRUE	0.619954	0.163808	FALSE	0.289108	-0.208665	FALSE
Chr_1	2544108	2545865	-	1758	NCAS_0A12900	0.656899	0.0985311	FALSE	2.84016e-34	2.09157	TRUE	0.687807	-0.154554	FALSE	0.0504272	-0.385976	FALSE
Chr_1	2546267	2548735	-	2469	NCAS_0A12910	0.124943	0.337782	FALSE	7.21529e-16	1.64981	TRUE	0.374338	-0.265034	FALSE	0.00129163	-0.657772	FALSE
Chr_1	2549093	2549851	-	759	NCAS_0A12920	0.0385637	0.280251	FALSE	0.00545097	0.396369	FALSE	0.26799	0.290134	FALSE	3.97431e-05	0.769381	FALSE
Chr_1	2550126	2550977	-	852	NCAS_0A12930	0.980911	0.00464169	FALSE	1.16057e-10	1.36385	TRUE	0.866941	-0.0866732	FALSE	0.975894	-0.00853983	FALSE
Chr_1	2551280	2551795	+	516	NCAS_0A12940	0.458997	0.246579	FALSE	9.34793e-08	1.48554	TRUE	0.977725	0.029969	FALSE	0.528038	-0.218445	FALSE
Chr_1	2551851	2552822	-	972	NCAS_0A12950	3.16835e-08	1.14264	TRUE	2.39264e-19	2.03043	TRUE	1.5692e-05	0.983264	FALSE	0.000730567	0.805399	FALSE
Chr_1	2553069	2553713	+	645	NCAS_0A12960	0.000411497	0.671441	FALSE	1.29121e-21	1.95608	TRUE	0.0389504	0.67736	FALSE	6.93393e-06	1.27566	TRUE
Chr_1	2554190	2555149	+	960	NCAS_0A12970	0.241426	0.277387	FALSE	2.92917e-24	1.98615	TRUE	0.953239	-0.0323665	FALSE	0.228827	-0.23985	FALSE
Chr_1	2555517	2557004	+	1488	NCAS_0A12980	0.919899	0.0381894	FALSE	3.28665e-21	1.73867	TRUE	0.939716	-0.0396341	FALSE	0.310454	-0.195088	FALSE
Chr_1	2557680	2558153	-	474	NCAS_0A12990	8.01748e-43	1.73433	TRUE	1.29615e-52	2.33929	TRUE	1.48177e-22	1.88879	TRUE	1.45188e-30	2.21351	TRUE
Chr_1	2559364	2559693	+	330	NCAS_0A13000	0.025637	0.328239	FALSE	2.55968e-30	1.76881	TRUE	0.921751	0.0421836	FALSE	0.355199	-0.14999	FALSE
Chr_1	2559871	2561415	-	1545	NCAS_0A13010	0.863993	-0.0503741	FALSE	1.60519e-20	1.81343	TRUE	0.857501	-0.089851	FALSE	0.0569642	-0.395378	FALSE
Chr_1	2561611	2562330	+	720	NCAS_0A13020	3.78737e-08	1.00889	TRUE	3.5343e-31	2.35549	TRUE	0.00186382	0.748038	FALSE	3.90013e-11	1.45614	TRUE
Chr_1	2562680	2563843	+	1164	NCAS_0A13030	0.994623	-0.00113197	FALSE	1.1612e-13	1.08903	TRUE	0.784056	-0.100295	FALSE	0.739065	-0.0653114	FALSE
Chr_1	2564168	2565685	+	1518	NCAS_0A13040	0.881095	0.0442676	FALSE	4.34905e-11	1.13426	TRUE	0.79771	-0.107341	FALSE	0.359793	-0.182616	FALSE
Chr_1	2566112	2567800	+	1689	NCAS_0A13050	0.478357	0.16685	FALSE	1.58687e-15	1.48871	TRUE	0.908246	-0.0531661	FALSE	0.00491621	-0.449136	FALSE
Chr_1	2568386	2570128	+	1743	NCAS_0A13060	0.785351	0.0807854	FALSE	7.59672e-12	1.30355	TRUE	0.81808	0.10071	FALSE	0.030169	-0.398366	FALSE
Chr_1	2570430	2571980	+	1551	NCAS_0A13070	0.301923	0.205808	FALSE	1.83442e-12	1.23156	TRUE	0.796244	-0.103113	FALSE	0.147394	-0.265185	FALSE
Chr_1	2574611	2575105	+	495	NCAS_0A13080	1.97215e-08	1.0403	TRUE	4.02257e-11	1.40379	TRUE	6.50184e-05	0.758484	FALSE	0.0298631	0.437944	FALSE
Chr_1	2575145	2576440	-	1296	NCAS_0A13090	1.03366e-10	1.19947	TRUE	1.32716e-38	2.63321	TRUE	1.87797e-06	0.892439	FALSE	0.000859721	0.653118	FALSE
Chr_1	2577324	2577971	-	648	NCAS_0A13100	0.00041266	0.62136	FALSE	3.14941e-25	1.9575	TRUE	0.129339	0.384759	FALSE	0.170323	0.309813	FALSE
Chr_1	2578270	2578476	+	207	NCAS_0A13110	8.22065e-20	1.68927	TRUE	4.67914e-06	1.03365	TRUE	1.5638e-21	1.43286	TRUE	3.41638e-06	0.739541	FALSE
Chr_1	2578641	2581481	-	2841	NCAS_0A13120	0.08755	0.269277	FALSE	4.57213e-21	1.46003	TRUE	0.566989	0.162707	FALSE	0.348548	-0.169478	FALSE
Chr_1	2581768	2582266	+	499	NCAS_0A13130	0.00394484	0.464206	FALSE	1.13664e-22	1.64433	TRUE	0.851748	-0.0897195	FALSE	0.00888798	-0.505072	FALSE
Chr_1	2582432	2584477	-	2046	NCAS_0A13140	0.393318	0.160147	FALSE	3.26083e-17	1.34978	TRUE	0.953239	0.0286432	FALSE	0.117007	-0.258193	FALSE
Chr_1	2585310	2586407	-	1098	NCAS_0A13150	2.24979e-07	0.800279	FALSE	2.91144e-23	1.75056	TRUE	0.00319691	0.52121	FALSE	0.13303	0.278589	FALSE
Chr_1	2587191	2588843	-	1653	NCAS_0A13160	5.38065e-12	0.902868	FALSE	2.74864e-24	1.56617	TRUE	5.5745e-07	0.762902	FALSE	0.000458401	0.555176	FALSE
Chr_1	2590304	2591062	+	759	NCAS_0A13170	1.1292e-06	0.687863	FALSE	1.26612e-16	1.33454	TRUE	0.0629856	0.4111	FALSE	0.0114286	0.498437	FALSE
Chr_1	2591658	2593238	+	1581	NCAS_0A13180	1.53262e-34	1.6807	TRUE	1.84466e-22	1.61409	TRUE	9.47629e-20	1.34944	TRUE	3.07767e-10	0.959369	FALSE
Chr_1	2593419	2596559	-	3141	NCAS_0A13190	4.98281e-08	0.839312	FALSE	2.7029e-15	1.41481	TRUE	2.18262e-07	0.742212	FALSE	0.0100631	0.393613	FALSE
Chr_1	2597013	2598980	+	1968	NCAS_0A13200	0.0597092	0.304346	FALSE	1.59299e-09	0.9866	FALSE	0.637966	0.179945	FALSE	0.654622	0.109947	FALSE
Chr_1	2599196	2600440	+	1245	NCAS_0A13210	0.00755076	0.461548	FALSE	5.99741e-09	1.07585	TRUE	0.0576134	0.399845	FALSE	0.258556	0.230823	FALSE
Chr_1	2600885	2601400	+	516	NCAS_0A13220	9.37442e-11	1.08079	TRUE	3.73839e-11	1.28835	TRUE	5.5108e-05	0.704224	FALSE	0.381657	0.180169	FALSE
Chr_1	2601589	2605353	-	3765	NCAS_0A13230	0.765219	0.0698679	FALSE	1.07316e-14	1.26914	TRUE	0.816486	-0.0941226	FALSE	0.396769	-0.159787	FALSE
Chr_1	2605834	2609250	+	3417	NCAS_0A13240	0.896955	0.0499818	FALSE	6.67926e-12	1.36666	TRUE	0.935208	0.0429614	FALSE	0.12496	-0.282194	FALSE
Chr_1	2609404	2613303	-	3900	NCAS_0A13250	0.721813	0.0721804	FALSE	6.58967e-18	1.3304	TRUE	0.716734	-0.119262	FALSE	0.0399857	-0.329991	FALSE
Chr_1	2613965	2614390	-	426	NCAS_0A13260	0.153558	0.241278	FALSE	2.41144e-18	1.38476	TRUE	0.502738	-0.199153	FALSE	6.79531e-05	-0.701803	FALSE
Chr_1	2614755	2615426	-	672	NCAS_0A13270	9.09299e-08	1.18226	TRUE	3.02408e-14	1.83859	TRUE	1.13386e-05	0.993751	FALSE	0.142757	0.383331	FALSE
Chr_1	2615567	2616736	-	1170	NCAS_0A13280	0.000437125	0.475112	FALSE	4.64892e-25	1.55204	TRUE	0.0980626	0.309337	FALSE	0.278657	0.189751	FALSE
Chr_1	2617284	2618408	+	1125	NCAS_0A13290	0.255155	0.182926	FALSE	1.20835e-13	1.12568	TRUE	0.686472	-0.13759	FALSE	0.201265	-0.233468	FALSE
Chr_1	2618686	2619540	+	855	NCAS_0A13300	0.00190737	0.485467	FALSE	3.37777e-07	0.877365	FALSE	0.803323	0.0869911	FALSE	0.305928	-0.165258	FALSE
Chr_1	2619736	2621058	-	1323	NCAS_0A13310	6.3698e-134	3.29007	TRUE	5.77342e-52	2.47381	TRUE	2.96513e-108	3.03147	TRUE	9.68475e-87	2.7205	TRUE
Chr_1	2622149	2623258	+	1110	NCAS_0A13320	0.737221	0.0803995	FALSE	1.70687e-08	0.979383	FALSE	0.292702	-0.234895	FALSE	4.14162e-05	-0.645969	FALSE
Chr_1	2623468	2625228	-	1761	NCAS_0A13330	0.09294	0.359576	FALSE	8.12634e-12	1.42279	TRUE	0.552933	-0.185004	FALSE	0.0166134	-0.446878	FALSE
Chr_1	2625779	2627617	+	1839	NCAS_0A13340	0.0200742	1.16146	TRUE	1.20427e-12	3.51617	TRUE	0.481472	0.515668	FALSE	0.263084	-0.576766	FALSE
Chr_1	2627917	2630319	+	2403	NCAS_0A13350	0.598918	0.104795	FALSE	1.20421e-21	1.52021	TRUE	0.888651	-0.0659871	FALSE	0.385849	-0.166066	FALSE
Chr_1	2630522	2631943	-	1422	NCAS_0A13360	0.253993	0.200447	FALSE	2.81344e-07	0.831905	FALSE	0.936424	-0.0380618	FALSE	0.0665541	-0.3021	FALSE
Chr_1	2632198	2632608	-	411	NCAS_0A13370	0.841878	-0.055453	FALSE	2.55207e-05	0.79172	FALSE	0.610429	-0.159855	FALSE	7.35267e-07	-0.825203	FALSE
Chr_1	2633641	2634630	-	990	NCAS_0A13380	0.173394	0.200886	FALSE	1.6926e-10	0.904117	FALSE	0.8573	-0.0736868	FALSE	0.0711179	-0.301316	FALSE
Chr_1	2634871	2636202	+	1332	NCAS_0A13390	0.000653783	0.624764	FALSE	2.20735e-24	1.98312	TRUE	0.13183	0.322298	FALSE	0.831618	-0.0487371	FALSE
Chr_1	2636978	2637928	+	951	NCAS_0A13400	0.3257	0.227386	FALSE	0.000108106	0.808206	FALSE	0.84384	0.0931454	FALSE	0.814797	-0.0554814	FALSE
Chr_1	2638271	2639206	+	936	NCAS_0A13410	0.318708	0.179162	FALSE	2.87363e-07	0.834854	FALSE	0.940591	-0.0360957	FALSE	0.0381724	-0.338423	FALSE
Chr_1	2639482	2641230	-	1749	NCAS_0A13420	0.125096	0.342874	FALSE	1.36246e-19	1.83837	TRUE	0.953239	-0.0371297	FALSE	0.000617564	-0.684567	FALSE
Chr_1	2641588	2643414	-	1827	NCAS_0A13430	0.713599	-0.077855	FALSE	1.8493e-07	0.969523	FALSE	0.612499	-0.164044	FALSE	0.749427	-0.0701808	FALSE
Chr_1	2643962	2646712	+	2751	NCAS_0A13440	0.614483	0.102298	FALSE	2.52351e-08	0.905769	FALSE	0.894331	-0.059782	FALSE	0.114591	-0.265497	FALSE
Chr_1	2646864	2650349	-	3486	NCAS_0A13450	0.690942	0.0815494	FALSE	6.27418e-28	1.69941	TRUE	0.737037	-0.10799	FALSE	0.00463756	-0.421628	FALSE
Chr_1	2650643	2651398	-	756	NCAS_0A13460	0.209119	0.258307	FALSE	5.5142e-26	1.88501	TRUE	0.988732	-0.00693526	FALSE	0.0497409	-0.339915	FALSE
Chr_1	2651815	2653452	-	1638	NCAS_0A13470	0.0860023	0.367871	FALSE	2.24282e-18	1.87256	TRUE	0.672971	0.143224	FALSE	0.288628	0.199556	FALSE
Chr_1	2653843	2655189	-	1347	NCAS_0A13480	0.00376576	0.496247	FALSE	9.07802e-28	1.98032	TRUE	0.130911	0.305071	FALSE	0.47377	-0.139829	FALSE
Chr_1	2655822	2656268	+	447	NCAS_0A13490	0.671309	0.0761977	FALSE	1.22039e-11	0.932585	FALSE	0.797758	0.108056	FALSE	0.0067726	0.48455	FALSE
Chr_1	2656922	2657686	+	765	NCAS_0A13500	0.837489	-0.0411285	FALSE	3.71119e-05	0.591715	FALSE	0.962457	-0.0311189	FALSE	0.555101	0.149578	FALSE
Chr_1	2657894	2658637	-	744	NCAS_0A13510	0.210306	0.800668	FALSE	1.18845e-08	3.37891	TRUE	0.973942	-0.0739113	FALSE	0.571791	-0.611524	FALSE
Chr_1	2659151	2659819	+	669	NCAS_0A13520	0.0460148	0.283746	FALSE	2.90222e-08	0.809415	FALSE	0.273484	0.284951	FALSE	0.0569917	0.379286	FALSE
Chr_1	2660152	2661843	+	1692	NCAS_0A13530	1.45583e-35	2.80224	TRUE	2.37779e-17	2.24394	TRUE	1.75012e-47	2.3695	TRUE	8.69646e-32	1.95825	TRUE
Chr_1	2661993	2664428	-	2436	NCAS_0A13540	0.240143	0.255256	FALSE	2.33713e-42	2.52087	TRUE	0.862632	0.0710555	FALSE	0.0160247	-0.387308	FALSE
Chr_1	2666062	2666559	+	498	NCAS_0A13550	0.770025	0.253136	FALSE	0.0922005	1.18501	FALSE	0.176346	0.832349	FALSE	0.0219208	1.17815	TRUE
Chr_1	2667385	2668341	+	957	NCAS_0A13560	0.593234	0.161871	FALSE	0.000225547	0.857457	FALSE	0.851748	0.0844048	FALSE	0.132256	-0.280884	FALSE
Chr_1	2668388	2669077	-	690	NCAS_0A13570	0.257604	0.243907	FALSE	3.8112e-09	1.12333	TRUE	0.953239	0.0321112	FALSE	0.046097	-0.34756	FALSE
Chr_1	2669298	2669762	+	465	NCAS_0A13580	0.00134683	0.689901	FALSE	1.95761e-15	1.80881	TRUE	0.272369	0.28385	FALSE	0.802862	-0.0594226	FALSE
Chr_1	2670572	2673154	+	2583	NCAS_0A13590	6.32066e-11	0.984182	FALSE	2.23785e-38	2.20314	TRUE	1.50408e-07	0.946406	FALSE	1.77151e-05	0.791497	FALSE
Chr_1	2673654	2675642	+	1989	NCAS_0A13600	2.59359e-12	1.01381	TRUE	7.87207e-29	1.90939	TRUE	1.58222e-07	0.945855	FALSE	6.10314e-08	0.975851	FALSE
Chr_1	2676688	2677539	+	852	NCAS_0A13610	0.964004	0.0106981	FALSE	1.0351e-05	0.631085	FALSE	0.899068	-0.0714959	FALSE	0.343748	-0.207652	FALSE
Chr_1	2677763	2679760	-	1998	NCAS_0A13620	7.26122e-23	1.97177	TRUE	7.41964e-42	3.04103	TRUE	2.26181e-20	1.7294	TRUE	2.80485e-14	1.45584	TRUE
Chr_1	2680770	2681594	+	825	NCAS_0A13630	0.370951	0.14337	FALSE	8.72696e-10	0.878737	FALSE	0.882225	0.0670114	FALSE	0.685656	-0.0816454	FALSE
Chr_1	2681868	2683133	+	1266	NCAS_0A13640	1.86177e-23	1.29639	TRUE	1.30543e-34	1.88793	TRUE	4.35426e-09	0.872002	FALSE	0.000148936	0.590201	FALSE
Chr_1	2683255	2685018	-	1764	NCAS_0A13650	0.00012531	1.62876	TRUE	1.67977e-20	3.8466	TRUE	0.000336755	1.24705	TRUE	0.0117631	0.921127	FALSE
Chr_1	2685393	2686238	+	846	NCAS_0A13660	0.584579	0.136061	FALSE	4.11624e-10	1.21081	TRUE	0.872258	-0.0821895	FALSE	0.283459	-0.232927	FALSE
Chr_1	2687177	2689636	+	2460	NCAS_0A13670	2.31277e-79	3.05603	TRUE	7.10685e-18	1.72068	TRUE	3.69558e-112	3.04935	TRUE	1.72445e-81	2.6018	TRUE
Chr_1	2690103	2691524	+	1422	NCAS_0A13680	2.45017e-61	2.1415	TRUE	5.41816e-27	1.70345	TRUE	1.18512e-39	1.96862	TRUE	2.70242e-30	1.72405	TRUE
Chr_1	2691723	2692607	-	885	NCAS_0A13690	0.791512	0.0589654	FALSE	4.53455e-06	0.721867	FALSE	0.336446	-0.218212	FALSE	0.000562038	-0.542135	FALSE
Chr_1	2692827	2693840	+	1014	NCAS_0A13700	1.27674e-05	0.684791	FALSE	2.99468e-22	1.68431	TRUE	0.0206114	0.483881	FALSE	0.0484594	0.400274	FALSE
Chr_1	2694129	2696390	-	2262	NCAS_0A13710	0.978697	-0.00637437	FALSE	4.13536e-07	0.770828	FALSE	0.918967	-0.0525665	FALSE	0.439146	-0.154752	FALSE
Chr_1	2696802	2697863	+	1062	NCAS_0A13720	0.776077	0.0929327	FALSE	2.95329e-21	2.03554	TRUE	0.77059	-0.122627	FALSE	0.6374	-0.105775	FALSE
Chr_1	2698652	2699080	+	429	NCAS_0A13730	0.446397	0.146785	FALSE	2.80368e-12	1.22317	TRUE	0.908172	-0.0637075	FALSE	0.5196	-0.147142	FALSE
Chr_1	2699208	2700137	-	930	NCAS_0A13740	0.00465294	0.417511	FALSE	7.09328e-13	1.12299	TRUE	0.724767	0.136343	FALSE	0.74009	-0.0742258	FALSE
Chr_1	2700393	2700914	+	522	NCAS_0A13750	0.458057	0.120016	FALSE	0.000896892	0.46114	FALSE	0.89178	0.0851954	FALSE	0.180528	0.320479	FALSE
Chr_1	2701600	2704077	+	2478	NCAS_0A13760	0.815724	-0.0476054	FALSE	6.58046e-05	0.592155	FALSE	0.883015	-0.0719212	FALSE	0.376272	-0.177383	FALSE
Chr_1	2704299	2705237	-	939	NCAS_0A13770	0.646157	-0.0963679	FALSE	3.36013e-43	2.79256	TRUE	0.896996	-0.0587703	FALSE	0.00832762	-0.426389	FALSE
Chr_1	2706227	2707000	-	774	NCAS_0A13780	0.766644	0.0913606	FALSE	1.12324e-25	2.02797	TRUE	0.792931	-0.114633	FALSE	0.183573	-0.275957	FALSE
Chr_1	2707419	2707688	-	270	NCAS_0A13790	0.0626628	0.583729	FALSE	3.08875e-09	1.84569	TRUE	0.919837	-0.0803807	FALSE	0.243567	-0.371256	FALSE
Chr_1	2708043	2709359	-	1317	NCAS_0A13800	0.00743969	0.38465	FALSE	9.65227e-35	1.8673	TRUE	0.913009	0.0559281	FALSE	0.599642	-0.110001	FALSE
Chr_1	2710214	2712670	-	2457	NCAS_0A13810	0.735229	0.0701446	FALSE	5.88924e-26	1.63183	TRUE	0.815668	-0.0897771	FALSE	0.0341874	-0.345062	FALSE
Chr_1	2713068	2714468	-	1401	NCAS_0A13820	0.969693	0.0228336	FALSE	2.96166e-20	1.60228	TRUE	0.916901	-0.05303	FALSE	0.0331228	-0.387841	FALSE
Chr_1	2715016	2715093	+	78	NCAS_0A13830	0.201179	0.205379	FALSE	0.0158664	0.374356	FALSE	0.844253	-0.0849823	FALSE	0.12435	-0.277325	FALSE
Chr_1	2715649	2719053	-	3405	NCAS_0A13840	0.787005	-0.0544321	FALSE	0.000239665	0.546259	FALSE	0.916189	-0.0596771	FALSE	0.678091	0.0977047	FALSE
Chr_1	2719597	2720694	+	1098	NCAS_0A13850	0.957076	0.0147214	FALSE	1.67088e-11	0.991627	FALSE	0.314824	-0.230825	FALSE	0.190671	-0.23176	FALSE
Chr_1	2721279	2721884	+	606	NCAS_0A13860	0.825606	0.0531388	FALSE	1.57916e-05	0.693101	FALSE	0.261187	-0.227866	FALSE	8.79093e-06	-0.647251	FALSE
Chr_1	2722379	2722924	-	546	NCAS_0A13870	0.927476	0.0235915	FALSE	0.578157	0.0875358	FALSE	0.489312	-0.170853	FALSE	0.0073639	-0.410117	FALSE
Chr_1	2723605	2726001	-	2397	NCAS_0A13880	0.0456291	0.335854	FALSE	2.75108e-25	1.76752	TRUE	0.483766	0.186722	FALSE	0.558719	0.114209	FALSE
Chr_1	2727108	2727779	+	672	NCAS_0A13890	2.46595e-13	1.53553	TRUE	6.72136e-11	1.60359	TRUE	3.14267e-11	1.14102	TRUE	7.55674e-05	0.720221	FALSE
Chr_1	2728572	2733722	+	5151	NCAS_0A13900	0.957202	-0.0119944	FALSE	3.16205e-09	0.856993	FALSE	0.906595	-0.0648415	FALSE	0.892546	-0.0337382	FALSE
Chr_1	2734031	2736100	-	2070	NCAS_0A13910	0.0943426	0.248116	FALSE	2.96924e-33	1.734	TRUE	0.977331	0.0167339	FALSE	0.977719	-0.00738762	FALSE
Chr_1	2736610	2738196	-	1587	NCAS_0A13920	0.894502	-0.0267372	FALSE	1.6284e-11	0.958138	FALSE	0.81808	-0.0951812	FALSE	0.875207	0.0348555	FALSE
Chr_1	2738769	2739851	+	1083	NCAS_0A13930	0.140514	0.239001	FALSE	8.29541e-13	1.12434	TRUE	0.845937	0.0928814	FALSE	0.697058	0.0896446	FALSE
Chr_1	2740150	2743767	+	3618	NCAS_0A13940	0.943361	-0.0154522	FALSE	1.37954e-11	0.959709	FALSE	0.824042	-0.0969584	FALSE	0.487526	-0.142121	FALSE
Chr_1	2743986	2745503	-	1518	NCAS_0A13950	0.00114722	0.554168	FALSE	1.03265e-20	1.75828	TRUE	0.0120182	0.411031	FALSE	0.900906	0.0260784	FALSE
Chr_1	2745725	2747065	-	1341	NCAS_0A13960	0.76505	0.0658023	FALSE	5.99352e-06	0.724482	FALSE	0.662782	-0.136736	FALSE	0.000278657	-0.569941	FALSE
Chr_1	2747328	2749769	+	2442	NCAS_0A13970	0.57375	-0.211744	FALSE	6.17129e-06	1.46866	TRUE	0.920811	-0.0476292	FALSE	0.011551	-0.418261	FALSE
Chr_1	2749990	2752773	-	2784	NCAS_0A13980	0.245648	0.229946	FALSE	3.37912e-26	1.882	TRUE	0.959642	-0.0270138	FALSE	0.00287695	-0.502906	FALSE
Chr_1	2752993	2754345	-	1353	NCAS_0A13990	0.793707	-0.063114	FALSE	1.90076e-14	1.59238	TRUE	0.944781	0.0468306	FALSE	0.893157	-0.038814	FALSE
Chr_1	2754534	2756369	+	1836	NCAS_0A14000	0.957076	-0.0110215	FALSE	3.2111e-12	1.46401	TRUE	0.988473	-0.0083051	FALSE	0.683229	-0.0917801	FALSE
Chr_1	2756462	2759086	-	2625	NCAS_0A14010	0.000131769	0.686389	FALSE	5.47104e-28	2.15002	TRUE	0.000537336	0.584235	FALSE	0.124959	0.278757	FALSE
Chr_1	2759295	2760509	-	1215	NCAS_0A14020	0.984178	0.0125136	FALSE	4.69756e-39	2.04448	TRUE	0.983651	-0.0107794	FALSE	0.261549	-0.212785	FALSE
Chr_1	2760841	2762415	-	1575	NCAS_0A14030	0.133764	0.304177	FALSE	1.44969e-10	1.21211	TRUE	0.238086	0.23614	FALSE	0.543583	-0.108333	FALSE
Chr_1	2762624	2762947	+	324	NCAS_0A14040	0.0220965	0.330176	FALSE	9.51723e-09	0.864007	FALSE	0.692225	0.204809	FALSE	0.118385	0.417628	FALSE
Chr_1	2763082	2764551	-	1470	NCAS_0A14050	0.826296	0.0806588	FALSE	9.95623e-12	1.41158	TRUE	0.387819	-0.284112	FALSE	0.530024	-0.162581	FALSE
Chr_1	2765451	2766983	+	1533	NCAS_0A14060	0.183474	0.253061	FALSE	5.86415e-06	0.830307	FALSE	0.358647	-0.201578	FALSE	6.90177e-05	-0.585216	FALSE
Chr_1	2767470	2767991	+	522	NCAS_0A14070	5.80313e-06	1.0367	TRUE	5.76332e-21	2.23749	TRUE	2.48199e-06	1.38694	TRUE	5.77281e-12	1.97238	TRUE
Chr_1	2769048	2771651	-	2604	NCAS_0A14090	0.707386	-0.181502	FALSE	0.120902	0.919301	FALSE	0.874591	-0.261141	FALSE	0.379238	0.672924	FALSE
Chr_1	2772160	2774115	+	1956	NCAS_0A14100	0.173254	-0.208986	FALSE	1.28676e-15	1.18813	TRUE	0.0804427	-0.3242	FALSE	1.94395e-06	-0.730317	FALSE
Chr_1	2774465	2776726	+	2262	NCAS_0A14110	0.661793	-0.0865156	FALSE	1.16879e-12	1.19742	TRUE	0.8125	-0.0884318	FALSE	0.0325298	-0.340602	FALSE
Chr_1	2777017	2778300	+	1284	NCAS_0A14120	2.61294e-05	0.690818	FALSE	3.22737e-17	1.55204	TRUE	0.164085	0.384288	FALSE	0.0335374	0.485337	FALSE
Chr_1	2778386	2778961	-	576	NCAS_0A14130	0.426716	0.177406	FALSE	1.58263e-10	1.15105	TRUE	0.928269	-0.0559242	FALSE	0.739883	0.0910633	FALSE
Chr_1	2779202	2779876	+	675	NCAS_0A14140	0.756116	-0.0836643	FALSE	0.000218505	0.833127	FALSE	0.940591	0.0510708	FALSE	0.675808	-0.110331	FALSE
Chr_1	2780086	2781798	+	1713	NCAS_0A14150	9.51913e-06	0.840227	FALSE	5.79048e-19	1.92324	TRUE	1.79302e-06	0.784147	FALSE	0.000942945	0.563262	FALSE
Chr_1	2782022	2783377	-	1356	NCAS_0A14160	0.90033	-0.0263499	FALSE	0.000123153	0.544239	FALSE	0.99225	-0.00709348	FALSE	0.52765	0.152439	FALSE
Chr_1	2783782	2785314	-	1533	NCAS_0A14170	0.797141	-0.069413	FALSE	0.00292174	0.591348	FALSE	0.285433	-0.222898	FALSE	0.00105692	-0.494413	FALSE
Chr_1	2786802	2787293	+	492	NCAS_0A14180	0.68864	-0.146583	FALSE	5.7946e-06	1.30229	TRUE	0.952361	-0.0573448	FALSE	0.0896477	-0.535538	FALSE
Chr_1	2788997	2795446	+	6450	NCAS_0A14190	0.0961173	0.246174	FALSE	1.42998e-25	1.55195	TRUE	0.270004	0.235017	FALSE	0.125047	0.256167	FALSE
Chr_1	2795611	2796354	-	744	NCAS_0A14200	0.405416	-0.151341	FALSE	7.47746e-100	3.53793	TRUE	0.315634	-0.282968	FALSE	0.0410869	-0.426359	FALSE
Chr_1	2797110	2798912	+	1803	NCAS_0A14210	1.32603e-32	1.75308	TRUE	5.64249e-17	1.50172	TRUE	2.82583e-17	1.58562	TRUE	1.2683e-19	1.70124	TRUE
Chr_1	2799630	2801111	-	1482	NCAS_0A14220	0.0882108	0.422966	FALSE	5.89084e-08	1.24258	TRUE	0.698266	-0.159791	FALSE	0.00030293	-0.729158	FALSE
Chr_1	2801647	2803356	+	1710	NCAS_0A14230	0.0350647	0.31846	FALSE	7.83881e-17	1.30876	TRUE	0.652179	0.162461	FALSE	0.0728964	0.34872	FALSE
Chr_1	2804135	2805832	+	1698	NCAS_0A14240	1.89419e-10	0.981827	FALSE	3.9396e-06	0.844844	FALSE	0.00789615	0.476621	FALSE	0.000879456	0.565592	FALSE
Chr_1	2806141	2807862	+	1722	NCAS_0A14250	0.0213267	0.407853	FALSE	4.15498e-21	1.66688	TRUE	0.0951742	0.339012	FALSE	0.934242	-0.0174207	FALSE
Chr_1	2808067	2808336	-	270	NCAS_0A14260	0.0104257	0.313834	FALSE	1.2204e-12	0.923539	FALSE	0.928959	0.0428024	FALSE	0.280668	-0.189741	FALSE
Chr_1	2808773	2810638	+	1866	NCAS_0A14270	0.342321	0.180751	FALSE	1.93516e-18	1.49864	TRUE	0.771283	-0.110519	FALSE	0.033356	-0.367212	FALSE
Chr_1	2811140	2812987	-	1848	NCAS_0A14280	0.0697667	0.355727	FALSE	5.09773e-17	1.57	TRUE	0.969493	-0.0204069	FALSE	0.818066	-0.0553994	FALSE
Chr_1	2813830	2815239	-	1410	NCAS_0A14290	0.999609	0.00117449	FALSE	2.52633e-19	1.24566	TRUE	0.694599	-0.12803	FALSE	0.763857	-0.0604083	FALSE
Chr_1	2815831	2817354	+	1524	NCAS_0A14300	0.534396	0.132721	FALSE	1.20587e-19	1.5819	TRUE	0.809545	-0.089609	FALSE	0.0195026	-0.371228	FALSE
Chr_1	2817732	2820035	-	2304	NCAS_0A14310	0.796453	0.118834	FALSE	7.00803e-13	2.41465	TRUE	0.95837	0.0331281	FALSE	0.0160814	0.48156	FALSE
Chr_1	2821218	2821580	+	363	NCAS_0A14320	0.00551076	0.490419	FALSE	3.13529e-16	1.51152	TRUE	0.96192	-0.027408	FALSE	0.0334606	-0.389646	FALSE
Chr_1	2821561	2825718	-	4158	NCAS_0A14330	0.795697	0.0742924	FALSE	8.33698e-25	1.84128	TRUE	0.905782	-0.0524014	FALSE	0.00583626	-0.425181	FALSE
Chr_1	2825967	2826485	-	519	NCAS_0A14340	0.0275289	0.56843	FALSE	2.92026e-14	1.91571	TRUE	0.727973	0.167038	FALSE	0.739774	0.0986769	FALSE
Chr_1	2826776	2827393	-	618	NCAS_0A14350	0.433445	0.134269	FALSE	2.99938e-05	0.624214	FALSE	0.675795	-0.129565	FALSE	0.0012147	-0.500411	FALSE
Chr_1	2827769	2828947	+	1179	NCAS_0A14360	0.250397	0.23334	FALSE	1.12936e-22	1.72409	TRUE	0.967648	0.029302	FALSE	0.0857547	0.383977	FALSE
Chr_1	2830136	2832325	+	2190	NCAS_0A14370	0.0284783	0.386778	FALSE	5.62265e-08	1.01071	TRUE	0.675795	0.145203	FALSE	0.405052	-0.162929	FALSE
Chr_1	2832482	2833459	-	978	NCAS_0A14380	0.957213	0.0226711	FALSE	6.41348e-09	1.26682	TRUE	0.645393	-0.140958	FALSE	0.100941	-0.277598	FALSE
Chr_1	2833944	2834666	+	723	NCAS_0A14390	0.08514	0.276833	FALSE	2.8447e-11	1.03837	TRUE	0.24092	0.275558	FALSE	0.480833	0.14578	FALSE
Chr_1	2834834	2835844	-	1011	NCAS_0A14400	0.424042	0.143029	FALSE	3.99217e-17	1.28037	TRUE	0.613798	-0.151227	FALSE	0.0144525	-0.403083	FALSE
Chr_1	2836750	2837109	-	360	NCAS_0A14410	5.65367e-36	2.31919	TRUE	6.09525e-11	1.47635	TRUE	6.12657e-40	2.21263	TRUE	3.14767e-35	2.08089	TRUE
Chr_1	2837723	2838322	+	600	NCAS_0A14420	0.992183	0.00311443	FALSE	0.00268969	0.485719	FALSE	0.864218	-0.0906739	FALSE	0.856649	0.0476147	FALSE
Chr_1	2839104	2840225	+	1122	NCAS_0A14430	6.09896e-18	1.54013	TRUE	2.98033e-38	2.62956	TRUE	1.63642e-17	1.38689	TRUE	1.52615e-10	1.0742	TRUE
Chr_1	2840790	2842730	+	1941	NCAS_0A14440	0.711942	0.0812087	FALSE	0.00196413	0.526966	FALSE	0.93209	0.0498598	FALSE	0.262449	-0.238341	FALSE
Chr_1	2843016	2843555	+	540	NCAS_0A14450	2.96261e-10	1.19205	TRUE	1.60998e-14	1.64524	TRUE	6.68549e-08	1.08228	TRUE	5.27579e-06	0.939702	FALSE
Chr_1	2847843	2848721	+	879	NCAS_0A14460	0.393337	0.599716	FALSE	0.00034595	2.12137	TRUE	0.694323	0.543261	FALSE	0.827314	0.229606	FALSE
Chr_1	2848835	2849923	-	1089	NCAS_0A14470	0.197563	0.228569	FALSE	4.03746e-28	1.76716	TRUE	0.96192	-0.0269531	FALSE	0.768284	-0.066771	FALSE
Chr_1	2850182	2851813	-	1632	NCAS_0A14480	0.899114	-0.0273101	FALSE	3.84634e-24	1.71299	TRUE	0.999488	-0.000790839	FALSE	0.81835	-0.0593239	FALSE
Chr_1	2852114	2855455	-	3342	NCAS_0A14490	0.987261	0.0053642	FALSE	1.25745e-06	0.826796	FALSE	0.779957	-0.106062	FALSE	0.330684	-0.177675	FALSE
Chr_1	2855747	2858878	-	3132	NCAS_0A14500	0.376386	0.21359	FALSE	4.19225e-08	1.16505	TRUE	0.777861	-0.0968592	FALSE	0.0106556	-0.388175	FALSE
Chr_1	2859919	2860467	+	549	NCAS_0A14510	0.540237	0.122762	FALSE	8.60815e-06	0.731511	FALSE	0.322886	-0.233508	FALSE	2.6845e-07	-0.820974	FALSE
Chr_1	2860704	2862716	-	2013	NCAS_0A14520	0.136758	0.257943	FALSE	5.27187e-18	1.45842	TRUE	0.867329	-0.0698916	FALSE	0.158321	-0.243197	FALSE
Chr_1	2863100	2866171	-	3072	NCAS_0A14530	0.999162	0.00513869	FALSE	4.91406e-20	1.51733	TRUE	0.867329	-0.0831844	FALSE	0.808073	-0.0594175	FALSE
Chr_1	2866635	2867186	-	552	NCAS_0A14540	1.88424e-14	1.50494	TRUE	1.00794e-22	2.23113	TRUE	2.94072e-22	1.62283	TRUE	1.05074e-12	1.22437	TRUE
Chr_1	2867437	2868228	-	792	NCAS_0A14550	9.94262e-22	1.68384	TRUE	7.53941e-29	2.28781	TRUE	7.02081e-14	1.72492	TRUE	2.50175e-16	1.88687	TRUE
Chr_1	2868704	2869522	+	819	NCAS_0A14560	0.956632	-0.0142205	FALSE	0.000315632	0.595742	FALSE	0.964383	-0.0322356	FALSE	0.323281	0.2562	FALSE
Chr_1	2869713	2870780	-	1068	NCAS_0A14570	0.957076	0.025104	FALSE	3.65673e-10	1.06774	TRUE	0.501777	-0.188843	FALSE	0.00478121	-0.486749	FALSE
Chr_1	2871182	2871685	-	504	NCAS_0A14580	0.147428	0.247453	FALSE	1.6311e-17	1.38685	TRUE	0.813129	0.120395	FALSE	0.266178	0.255472	FALSE
Chr_1	2871918	2873171	+	1254	NCAS_0A14590	0.836477	0.0457321	FALSE	2.64989e-07	0.756833	FALSE	0.904465	0.0727179	FALSE	0.724976	0.0895312	FALSE
Chr_1	2873411	2874285	+	875	NCAS_0A14600	0.531435	0.110299	FALSE	2.43024e-07	0.76184	FALSE	0.924734	-0.0497678	FALSE	0.396427	-0.170277	FALSE
Chr_1	2874750	2875145	-	396	NCAS_0A14610	0.808418	0.0503096	FALSE	9.75121e-08	0.780239	FALSE	0.694599	-0.122212	FALSE	0.0989986	-0.264965	FALSE
Chr_1	2876103	2877560	-	1458	NCAS_0A14620	0.932399	-0.018784	FALSE	8.67684e-11	1.01603	TRUE	0.753187	-0.120925	FALSE	0.230354	-0.226585	FALSE
Chr_1	2878338	2880029	-	1692	NCAS_0A14630	0.423066	-0.157466	FALSE	0.876725	-0.0282883	FALSE	0.318383	-0.263986	FALSE	0.951043	-0.0158155	FALSE
Chr_1	2880847	2883099	+	2253	NCAS_0A14640	0.805448	0.0514941	FALSE	6.86978e-11	0.946469	FALSE	0.986292	-0.0108946	FALSE	0.42785	-0.167716	FALSE
Chr_1	2883256	2884380	-	1125	NCAS_0A14650	0.914006	0.0345056	FALSE	1.92523e-16	1.46784	TRUE	0.544425	-0.170378	FALSE	0.0022283	-0.504661	FALSE
Chr_1	2885486	2889202	+	3717	NCAS_0A14660	0.269383	0.223036	FALSE	2.99027e-15	1.47881	TRUE	0.738421	0.116513	FALSE	0.139328	-0.253646	FALSE
Chr_1	2889824	2890482	+	659	NCAS_0A14670	0.00320498	0.387564	FALSE	4.09317e-09	0.844387	FALSE	0.969417	0.0220284	FALSE	0.660031	-0.0966403	FALSE
Chr_1	2890578	2893169	-	2592	NCAS_0A14680	0.0171948	0.445768	FALSE	8.62634e-19	1.76074	TRUE	0.2883	0.227071	FALSE	0.0539036	-0.311755	FALSE
Chr_1	2893776	2897702	+	3927	NCAS_0A14690	1.19358e-11	1.18611	TRUE	5.41493e-13	1.47304	TRUE	3.99896e-09	0.993349	FALSE	4.88281e-05	0.715265	FALSE
Chr_1	2897923	2900892	+	2970	NCAS_0A14700	5.70744e-06	0.713388	FALSE	2.49111e-17	1.50162	TRUE	0.00420081	0.484851	FALSE	0.0724978	0.30974	FALSE
Chr_1	2901551	2903176	-	1626	NCAS_0A14710	0.781774	-0.0584003	FALSE	7.70643e-14	1.19057	TRUE	0.865184	-0.0827763	FALSE	0.901773	-0.0299579	FALSE
Chr_1	2903450	2904907	+	1458	NCAS_0A14720	0.534396	0.121531	FALSE	6.82468e-24	1.57704	TRUE	0.968791	0.0249428	FALSE	0.456995	0.170177	FALSE
Chr_1	2905726	2906838	+	1113	NCAS_0A14730	0.308238	-0.162607	FALSE	1.02853e-19	1.35221	TRUE	0.909968	-0.0613727	FALSE	0.386116	0.182724	FALSE
Chr_1	2907182	2908699	+	1518	NCAS_0A14740	0.836152	0.0401005	FALSE	3.11813e-18	1.13814	TRUE	0.60356	-0.144251	FALSE	0.294032	-0.175908	FALSE
Chr_1	2909610	2910260	-	651	NCAS_0A14750	0.000875409	0.651021	FALSE	3.26374e-10	1.30763	TRUE	0.201712	0.298414	FALSE	0.123462	-0.299762	FALSE
Chr_1	2910441	2911601	+	1161	NCAS_0A14760	0.218213	0.252818	FALSE	1.8377e-22	1.729	TRUE	0.999826	0.0015112	FALSE	0.0897848	-0.310699	FALSE
Chr_1	2911657	2912559	-	903	NCAS_0A14770	0.870504	0.0508662	FALSE	1.28082e-16	1.43487	TRUE	0.661353	-0.142094	FALSE	0.0278009	-0.376477	FALSE
Chr_1	2912720	2914036	+	1317	NCAS_0A14780	0.999162	0.00134895	FALSE	1.26395e-05	0.921114	FALSE	0.850147	-0.0819795	FALSE	0.279094	-0.201812	FALSE
Chr_1	2914328	2917567	-	3240	NCAS_0A14790	0.187564	0.225627	FALSE	5.65059e-12	1.13735	TRUE	0.736418	-0.122837	FALSE	0.153791	-0.259962	FALSE
Chr_1	2918211	2921429	+	3219	NCAS_0A14800	0.0115115	0.412138	FALSE	9.49671e-21	1.60436	TRUE	0.181976	0.262555	FALSE	0.832511	-0.0420841	FALSE
Chr_1	2921788	2922411	+	624	NCAS_0A14810	0.553306	-0.0978915	FALSE	9.43721e-05	0.547254	FALSE	0.909095	-0.0671803	FALSE	0.069205	0.382917	FALSE
Chr_1	2924141	2925007	+	867	NCAS_0A14820	0.00153988	0.692758	FALSE	4.13375e-16	1.9591	TRUE	0.829687	0.112352	FALSE	0.31369	-0.230928	FALSE
Chr_1	2927005	2927688	+	684	NCAS_0A14840	6.20299e-13	1.4018	TRUE	1.4686e-20	2.03229	TRUE	5.55919e-05	0.941114	FALSE	3.17939e-05	0.967957	FALSE
Chr_1	2928086	2929825	+	1740	NCAS_0A14850	0.868053	-0.0510717	FALSE	0.000181397	0.797271	FALSE	0.732938	-0.113943	FALSE	0.440972	-0.136412	FALSE
Chr_1	2930592	2930789	-	198	NCAS_0A14860	0.273665	0.832388	FALSE	0.00280964	2.14742	TRUE	0.481304	1.10426	FALSE	0.21005	1.42255	FALSE
Chr_1	2931300	2932086	+	787	NCAS_0A14870	0.119673	0.223288	FALSE	2.11932e-15	1.11347	TRUE	0.603285	-0.14854	FALSE	0.00393045	-0.451388	FALSE
Chr_1	2932325	2933050	-	726	NCAS_0A14880	0.0681338	0.273533	FALSE	9.18091e-05	0.600316	FALSE	0.931287	-0.040125	FALSE	0.00205207	-0.47824	FALSE
Chr_1	2933969	2935819	+	1851	NCAS_0A14890	0.841598	0.0706841	FALSE	0.00012962	0.912557	FALSE	0.987252	0.00888317	FALSE	0.918499	0.0216275	FALSE
Chr_1	2936050	2936979	-	930	NCAS_0A14900	0.0419747	0.557132	FALSE	5.86241e-17	2.18079	TRUE	0.830238	-0.149435	FALSE	0.0804879	0.540106	FALSE
Chr_1	2937433	2939016	+	1584	NCAS_0A14910	0.105262	0.246539	FALSE	2.68255e-20	1.40871	TRUE	0.7245	0.125575	FALSE	0.391885	0.16123	FALSE
Chr_1	2939131	2940351	-	1221	NCAS_0A14920	0.273628	0.249646	FALSE	4.842e-22	1.80375	TRUE	0.864218	0.0948435	FALSE	0.892546	0.0379799	FALSE
Chr_1	2940547	2940930	-	384	NCAS_0A14930	8.987e-15	1.05563	TRUE	1.44615e-31	1.84422	TRUE	0.0198478	1.01715	TRUE	0.00102974	1.32139	TRUE
Chr_1	2941337	2945347	+	4011	NCAS_0A14940	0.400619	0.158971	FALSE	4.06725e-05	0.692108	FALSE	0.632114	-0.16226	FALSE	0.568356	-0.121492	FALSE
Chr_1	2945758	2946582	+	825	NCAS_0A14950	6.32519e-29	1.53159	TRUE	2.23267e-30	1.88498	TRUE	2.59845e-33	1.85441	TRUE	1.74678e-21	1.48857	TRUE
Chr_1	2946713	2947150	-	438	NCAS_0A14960	0.00149125	0.857548	FALSE	3.82256e-13	2.03008	TRUE	0.138364	0.3984	FALSE	0.419502	-0.2097	FALSE
Chr_1	2947861	2949249	+	1389	NCAS_0A14970	0.581129	0.130633	FALSE	1.54696e-39	2.29431	TRUE	0.766379	-0.111839	FALSE	0.194587	-0.233539	FALSE
Chr_1	2949543	2951579	+	2037	NCAS_0A14980	0.13973	0.262263	FALSE	3.6877e-26	1.75924	TRUE	0.99791	-0.00247096	FALSE	0.0094891	-0.436221	FALSE
Chr_1	2951806	2952663	+	858	NCAS_0A14990	0.593234	0.0949768	FALSE	6.1694e-19	1.27344	TRUE	0.911528	-0.0651015	FALSE	0.904981	0.0312378	FALSE
Chr_1	2953340	2954017	+	678	NCAS_0A15000	0.475273	-0.127548	FALSE	3.61393e-05	0.64474	FALSE	0.906595	-0.0725378	FALSE	0.150084	0.325923	FALSE
Chr_1	2954450	2957158	+	2709	NCAS_0A15010	1.39413e-30	1.38582	TRUE	6.83469e-78	2.70678	TRUE	1.81405e-15	1.19125	TRUE	9.74532e-13	1.07806	TRUE
Chr_1	2957420	2959849	+	2430	NCAS_0A15020	3.07845e-26	1.98215	TRUE	2.07778e-41	2.85331	TRUE	4.0538e-17	1.58338	TRUE	5.42332e-19	1.68579	TRUE
Chr_1	2960093	2961661	+	1569	NCAS_0A15030	0.811866	0.0600419	FALSE	2.23964e-07	0.919099	FALSE	0.967422	-0.0217262	FALSE	0.488813	-0.138341	FALSE
Chr_1	2962030	2964036	-	2007	NCAS_0A15040	0.670995	0.107296	FALSE	7.92981e-16	1.53171	TRUE	0.953239	-0.031887	FALSE	0.934448	0.0195696	FALSE
Chr_1	2964333	2966084	-	1752	NCAS_0A15050	0.000547447	0.540095	FALSE	5.09465e-21	1.60161	TRUE	0.353506	0.232537	FALSE	0.844523	0.0446336	FALSE
Chr_1	2966614	2970774	+	4161	NCAS_0A15060	0.000394708	0.533447	FALSE	5.17207e-23	1.64327	TRUE	0.0197824	0.371936	FALSE	0.352595	0.155396	FALSE
Chr_1	2971104	2971739	+	636	NCAS_0A15070	0.21309	0.193003	FALSE	7.57185e-07	0.725215	FALSE	0.962452	0.0369546	FALSE	0.000905876	0.798326	FALSE
Chr_1	2971991	2972338	-	348	NCAS_0A15080	0.486094	0.158683	FALSE	0.0356948	0.399229	FALSE	0.386746	0.311581	FALSE	0.0521549	0.485351	FALSE
Chr_1	2972500	2973333	-	834	NCAS_0A15090	3.39621e-41	2.18757	TRUE	3.79675e-19	1.76059	TRUE	5.79701e-08	2.2484	TRUE	1.66441e-14	3.11238	TRUE
Chr_1	2973470	2975080	+	1611	NCAS_0A15100	0.765769	-0.0740243	FALSE	0.00276691	0.61275	FALSE	0.969493	0.0219267	FALSE	0.673739	0.0955808	FALSE
Chr_1	2975267	2977192	+	1926	NCAS_0A15110	0.800223	0.077229	FALSE	1.06448e-11	1.21956	TRUE	0.619326	-0.203004	FALSE	0.53359	-0.164239	FALSE
Chr_1	2977428	2978045	+	618	NCAS_0A15120	0.0780117	0.361115	FALSE	0.000119696	0.786647	FALSE	0.940591	0.0439877	FALSE	0.150084	-0.292064	FALSE
Chr_1	2978192	2979496	-	1305	NCAS_0A15130	0.908289	0.0348682	FALSE	5.5967e-10	1.03163	TRUE	0.928269	-0.047703	FALSE	0.728132	-0.0768183	FALSE
Chr_1	2979690	2980622	-	933	NCAS_0A15140	0.388354	0.164842	FALSE	9.93984e-13	1.1864	TRUE	0.996815	-0.00245328	FALSE	0.0595365	0.42841	FALSE
Chr_1	2980865	2983012	+	2148	NCAS_0A15150	0.487011	0.149934	FALSE	3.14752e-08	0.989266	FALSE	0.693591	-0.127174	FALSE	0.00898316	-0.420192	FALSE
Chr_1	2983096	2984064	-	969	NCAS_0A15160	7.83909e-06	0.626015	FALSE	4.25266e-24	1.59643	TRUE	0.0625097	0.357558	FALSE	0.177355	0.246491	FALSE
Chr_1	2984221	2985645	+	1425	NCAS_0A15170	2.21455e-08	0.841277	FALSE	1.92024e-27	1.85113	TRUE	0.00284105	0.556411	FALSE	0.00887698	0.484607	FALSE
Chr_1	2985713	2987644	-	1932	NCAS_0A15180	0.773102	0.0999254	FALSE	1.07115e-12	1.54299	TRUE	0.811944	-0.0876105	FALSE	0.000147452	-0.574419	FALSE
Chr_1	2987846	2988892	+	1047	NCAS_0A15190	0.0187685	0.360147	FALSE	1.84784e-19	1.43477	TRUE	0.622716	0.142179	FALSE	0.550368	-0.108639	FALSE
Chr_1	2989104	2991371	-	2268	NCAS_0A15200	0.700851	0.0720407	FALSE	5.28326e-10	0.907807	FALSE	0.854211	-0.0767798	FALSE	0.100944	-0.282547	FALSE
Chr_1	2991616	2992800	+	1185	NCAS_0A15210	0.157941	0.236399	FALSE	5.58091e-13	1.16249	TRUE	0.957448	-0.0256007	FALSE	0.373706	-0.152582	FALSE
Chr_1	2993226	2993450	+	225	NCAS_0A15220	2.72035e-31	1.85062	TRUE	5.88955e-20	1.74723	TRUE	1.41184e-20	1.52625	TRUE	1.73747e-14	1.28357	TRUE
Chr_1	2994071	2994868	+	798	NCAS_0A15230	0.741394	0.0601476	FALSE	4.3707e-05	0.554979	FALSE	0.502146	-0.183791	FALSE	0.127021	-0.269483	FALSE
Chr_1	2995132	2995503	+	372	NCAS_0A15240	3.78417e-06	0.974949	FALSE	2.22884e-08	1.32499	TRUE	9.11229e-06	0.736656	FALSE	0.053816	0.350327	FALSE
Chr_1	2996060	3000625	+	4566	NCAS_0A15250	2.46962e-21	1.485	TRUE	2.66389e-20	1.73904	TRUE	1.17516e-24	1.53331	TRUE	2.78331e-15	1.19951	TRUE
Chr_1	3001144	3003150	+	2007	NCAS_0A15260	0.000112063	0.571546	FALSE	1.2879e-20	1.52708	TRUE	0.260987	0.263775	FALSE	0.987709	0.00400368	FALSE
Chr_1	3003516	3004817	-	1302	NCAS_0A15270	0.00301274	0.554904	FALSE	8.96381e-26	2.07164	TRUE	0.0604627	0.375904	FALSE	0.823791	0.0528394	FALSE
Chr_1	3005298	3005869	+	572	NCAS_0A15280	0.224534	0.256625	FALSE	5.21526e-05	0.801388	FALSE	0.818257	-0.0834383	FALSE	0.0122601	-0.379472	FALSE
Chr_1	3006134	3006700	-	567	NCAS_0A15290	0.947499	-0.00741718	FALSE	1.21169e-17	1.70996	TRUE	0.80341	-0.0960782	FALSE	0.00248856	-0.501693	FALSE
Chr_1	3006855	3011051	+	4197	NCAS_0A15300	0.949677	0.0207168	FALSE	4.16918e-18	1.44957	TRUE	0.928269	-0.041191	FALSE	0.0497567	-0.314761	FALSE
Chr_1	3012014	3013963	-	1950	NCAS_0A15310	0.722182	-0.0799519	FALSE	7.49934e-19	1.68286	TRUE	0.763109	-0.103317	FALSE	0.112545	-0.257076	FALSE
Chr_1	3014230	3015348	+	1119	NCAS_0A15320	0.0948637	0.256213	FALSE	5.21645e-16	1.25319	TRUE	0.84152	0.0792837	FALSE	0.676516	-0.0796254	FALSE
Chr_1	3015596	3016639	+	1044	NCAS_0A15330	7.23021e-11	0.885181	FALSE	8.91699e-16	1.28484	TRUE	8.74426e-06	0.709706	FALSE	0.0057244	0.461002	FALSE
Chr_1	3017261	3018730	+	1470	NCAS_0A15340	0.734188	-0.0866928	FALSE	4.02126e-10	1.71021	TRUE	0.534864	-0.190739	FALSE	0.00129573	-0.596788	FALSE
Chr_1	3019029	3019449	+	421	NCAS_0A15350	1	0.454331	FALSE	0.351131	0.953358	FALSE	0.979784	0.108329	FALSE	1	0.39431	FALSE
Chr_2	1	989	-	989	NCAS_0B00100	0.782939	-0.0649693	FALSE	1.85372e-11	1.86806	TRUE	0.805183	-0.120214	FALSE	0.010791	-0.552518	FALSE
Chr_2	2769	3821	-	1053	NCAS_0B00110	0.000546499	0.428915	FALSE	9.71062e-07	0.683816	FALSE	0.915845	0.0507088	FALSE	0.951043	-0.01351	FALSE
Chr_2	5089	5601	+	513	NCAS_0B00120	3.65479e-05	0.698971	FALSE	1.91333e-21	1.72999	TRUE	0.00530864	0.527202	FALSE	0.244897	0.237518	FALSE
Chr_2	5849	7543	-	1695	NCAS_0B00130	0.594501	0.102621	FALSE	2.75771e-07	0.812841	FALSE	0.887711	-0.0630182	FALSE	0.0011295	-0.520313	FALSE
Chr_2	8079	10724	+	2646	NCAS_0B00140	0.682918	0.121185	FALSE	1.36043e-06	1.09555	TRUE	0.542015	0.186203	FALSE	0.904981	-0.0273422	FALSE
Chr_2	10879	11631	-	753	NCAS_0B00150	0.673897	0.0781797	FALSE	9.232e-06	0.63863	FALSE	0.893818	-0.0680451	FALSE	0.293531	-0.210246	FALSE
Chr_2	11885	12651	+	767	NCAS_0B00160	1.11189e-23	1.70736	TRUE	9.6312e-12	1.40316	TRUE	1.8793e-18	1.36079	TRUE	4.71579e-10	0.99713	FALSE
Chr_2	13311	14801	-	1491	NCAS_0B00180	2.10436e-15	1.33542	TRUE	3.01298e-20	1.82846	TRUE	5.95906e-12	1.08293	TRUE	9.94967e-06	0.726617	FALSE
Chr_2	15368	17134	+	1767	NCAS_0B00190	0.940695	-0.0169311	FALSE	5.99498e-22	1.53866	TRUE	0.436167	-0.197708	FALSE	0.000462964	-0.566112	FALSE
Chr_2	17311	18255	-	945	NCAS_0B00200	0.586315	0.108519	FALSE	4.28612e-07	0.822707	FALSE	0.906038	-0.0514655	FALSE	0.00379385	-0.434925	FALSE
Chr_2	18653	19636	-	984	NCAS_0B00210	0.635984	0.107501	FALSE	4.94682e-08	0.962279	FALSE	0.925952	-0.0504793	FALSE	0.216716	-0.247255	FALSE
Chr_2	20530	22407	-	1878	NCAS_0B00220	0.412152	0.396862	FALSE	3.19933e-05	1.79489	TRUE	0.412505	0.222069	FALSE	0.0245736	0.409052	FALSE
Chr_2	22985	23914	+	930	NCAS_0B00230	0.0291056	0.382595	FALSE	6.96615e-25	1.83638	TRUE	0.737261	0.119351	FALSE	0.548577	-0.116498	FALSE
Chr_2	24051	25661	-	1611	NCAS_0B00240	0.0455065	0.330248	FALSE	2.43796e-14	1.32286	TRUE	0.927161	-0.0433036	FALSE	0.971385	-0.00756035	FALSE
Chr_2	26236	27186	+	951	NCAS_0B00250	0.349612	-0.324417	FALSE	5.13536e-18	2.27646	TRUE	0.887711	-0.075518	FALSE	0.00895963	-0.516298	FALSE
Chr_2	27274	27540	-	267	NCAS_0B00260	0.408132	0.186369	FALSE	8.82096e-06	0.921965	FALSE	0.93897	-0.0449691	FALSE	0.300079	-0.22193	FALSE
Chr_2	27753	29183	+	1431	NCAS_0B00270	0.11484	0.429414	FALSE	9.74274e-11	1.66731	TRUE	0.940591	0.0580816	FALSE	0.867661	-0.0473552	FALSE
Chr_2	30005	33250	+	3246	NCAS_0B00280	0.607214	0.0998045	FALSE	6.86668e-18	1.33463	TRUE	0.441855	-0.189327	FALSE	0.00124895	-0.506311	FALSE
Chr_2	33760	35388	+	1629	NCAS_0B00290	0.378554	0.268067	FALSE	6.80469e-23	2.3829	TRUE	0.8878	-0.0713934	FALSE	0.49648	-0.147123	FALSE
Chr_2	35915	37596	-	1682	NCAS_0B00300	0.0461574	0.327655	FALSE	5.10025e-14	1.26756	TRUE	0.584057	0.168588	FALSE	0.93457	-0.0184323	FALSE
Chr_2	37876	39570	-	1695	NCAS_0B00310	0.5863	0.124233	FALSE	1.5191e-30	1.93287	TRUE	0.687887	-0.14262	FALSE	0.00263277	-0.52996	FALSE
Chr_2	39886	40695	-	810	NCAS_0B00320	2.60597e-51	2.49596	TRUE	5.23187e-37	2.52543	TRUE	6.89019e-42	2.31762	TRUE	5.5683e-50	2.5433	TRUE
Chr_2	41882	42481	+	600	NCAS_0B00330	0.992613	0.0228573	FALSE	5.21078e-21	2.33964	TRUE	0.953239	-0.035447	FALSE	0.827568	0.0619057	FALSE
Chr_2	42718	43626	+	909	NCAS_0B00340	0.541315	0.158184	FALSE	9.54427e-11	1.29083	TRUE	0.96689	0.0214642	FALSE	0.0150278	-0.406956	FALSE
Chr_2	43786	45075	-	1290	NCAS_0B00350	8.72632e-59	3.00704	TRUE	1.14932e-24	2.32818	TRUE	1.53633e-13	3.02867	TRUE	1.69843e-24	4.13686	TRUE
Chr_2	46443	47081	-	639	NCAS_0B00360	7.12505e-21	2.39822	TRUE	1.59239e-27	3.07699	TRUE	8.71982e-25	2.33009	TRUE	1.32945e-24	2.34896	TRUE
Chr_2	48637	49680	+	1044	NCAS_0B00370	0.852378	-0.0384916	FALSE	3.09448e-12	1.24337	TRUE	0.560408	-0.167224	FALSE	0.0679631	-0.316348	FALSE
Chr_2	50110	51300	+	1191	NCAS_0B00380	5.51775e-32	1.68269	TRUE	1.34367e-35	2.13939	TRUE	6.43361e-21	1.37338	TRUE	2.4503e-11	1.00027	TRUE
Chr_2	51434	52336	-	903	NCAS_0B00390	1.32199e-23	1.61832	TRUE	1.43717e-18	1.69003	TRUE	5.06089e-14	1.29113	TRUE	2.43557e-07	0.918612	FALSE
Chr_2	52501	52827	+	327	NCAS_0B00400	0.0691456	0.286876	FALSE	0.000246216	0.577686	FALSE	0.951669	-0.0302767	FALSE	0.00126166	-0.511116	FALSE
Chr_2	53020	54219	+	1200	NCAS_0B00410	2.52019e-06	0.690976	FALSE	1.95929e-16	1.3588	TRUE	0.0256457	0.474096	FALSE	0.435936	0.17682	FALSE
Chr_2	54562	56718	-	2157	NCAS_0B00420	0.0178828	0.438545	FALSE	3.00327e-17	1.63867	TRUE	0.960822	-0.0284595	FALSE	0.328689	-0.205257	FALSE
Chr_2	57814	59280	+	1467	NCAS_0B00430	2.21994e-10	1.16554	TRUE	4.07767e-18	1.85316	TRUE	4.56884e-12	1.06109	TRUE	0.000135516	0.619923	FALSE
Chr_2	59467	61992	-	2526	NCAS_0B00440	0.721934	0.0728923	FALSE	4.05856e-07	0.792193	FALSE	0.682233	-0.120962	FALSE	0.1017	-0.253169	FALSE
Chr_2	62344	63327	-	984	NCAS_0B00450	0.373636	0.183256	FALSE	2.24906e-19	1.59716	TRUE	0.897044	0.073055	FALSE	0.152202	0.298275	FALSE
Chr_2	65100	66020	+	921	NCAS_0B00460	0.00573342	-0.941762	FALSE	0.000453093	1.31124	TRUE	0.905719	0.168346	FALSE	0.000216045	1.75815	TRUE
Chr_2	67250	67696	+	447	NCAS_0B00470	1.81768e-49	2.61111	TRUE	1.31094e-31	2.52458	TRUE	3.76082e-48	2.22545	TRUE	1.65014e-51	2.30706	TRUE
Chr_2	69598	70968	+	1371	NCAS_0B00480	0.920896	-0.0310262	FALSE	4.00153e-09	1.25505	TRUE	0.851748	-0.0782675	FALSE	0.376312	-0.16328	FALSE
Chr_2	71160	73154	-	1995	NCAS_0B00490	0.982078	0.00674182	FALSE	5.30999e-20	1.86541	TRUE	0.0733723	-0.384558	FALSE	0.827923	0.0524204	FALSE
Chr_2	74428	75741	+	1314	NCAS_0B00500	0.720968	0.102209	FALSE	4.10764e-17	1.65649	TRUE	0.898604	-0.06116	FALSE	0.00716962	-0.458262	FALSE
Chr_2	75837	77873	-	2037	NCAS_0B00510	5.85545e-12	0.993252	FALSE	2.89294e-26	1.77427	TRUE	5.06356e-08	0.837927	FALSE	0.00016479	0.603136	FALSE
Chr_2	78443	78922	+	480	NCAS_0B00520	0.694545	-0.0728329	FALSE	0.00189781	0.465203	FALSE	0.934079	0.147226	FALSE	0.0367359	1.26717	TRUE
Chr_2	79130	80257	+	1128	NCAS_0B00530	0.68864	-0.068465	FALSE	2.03714e-08	0.827418	FALSE	0.833442	-0.0843724	FALSE	0.0429299	-0.339629	FALSE
Chr_2	81337	82911	+	1575	NCAS_0B00540	0.917763	-0.0255589	FALSE	6.97659e-09	0.92364	FALSE	0.940591	-0.0408775	FALSE	0.206234	0.250375	FALSE
Chr_2	83128	83976	+	849	NCAS_0B00550	2.68015e-06	0.786831	FALSE	3.80058e-22	1.8441	TRUE	0.00036713	0.61274	FALSE	0.142681	0.275782	FALSE
Chr_2	84089	85189	-	1101	NCAS_0B00560	0.537373	-0.152605	FALSE	9.14295e-10	1.76242	TRUE	0.92752	-0.0557837	FALSE	0.0287774	-0.480339	FALSE
Chr_2	85404	86297	-	894	NCAS_0B00570	1.46086e-08	0.853779	FALSE	1.56634e-16	1.43997	TRUE	0.0585191	0.850584	FALSE	1.86551e-05	1.6385	TRUE
Chr_2	86690	88090	+	1401	NCAS_0B00580	0.127537	0.307506	FALSE	2.76636e-43	2.53493	TRUE	0.806692	-0.0902032	FALSE	0.0773236	-0.291521	FALSE
Chr_2	88134	89003	-	870	NCAS_0B00590	0.317996	0.23177	FALSE	6.43331e-09	1.16931	TRUE	0.747681	0.134878	FALSE	0.707668	0.0881483	FALSE
Chr_2	89188	89889	+	702	NCAS_0B00600	0.0891241	0.276104	FALSE	8.80268e-27	1.62062	TRUE	0.504591	0.24012	FALSE	6.19097e-05	0.841614	FALSE
Chr_2	90104	90520	+	417	NCAS_0B00610	0.306625	0.166774	FALSE	3.07048e-07	0.776172	FALSE	0.833152	0.278374	FALSE	0.00870362	1.40361	TRUE
Chr_2	90784	91227	+	444	NCAS_0B00620	0.41147	0.15007	FALSE	0.00057859	0.553925	FALSE	0.785921	-0.115609	FALSE	0.704876	-0.085101	FALSE
Chr_2	91273	92211	-	939	NCAS_0B00630	0.503576	0.235882	FALSE	2.03494e-06	1.28634	TRUE	0.76276	0.115592	FALSE	0.0730599	-0.318567	FALSE
Chr_2	92384	93331	-	948	NCAS_0B00640	0.526057	0.122526	FALSE	0.000132131	0.609138	FALSE	0.909095	0.0588954	FALSE	0.196601	-0.245286	FALSE
Chr_2	93563	94261	+	699	NCAS_0B00650	0.406976	0.278199	FALSE	1.41256e-10	1.71179	TRUE	0.932736	0.0605648	FALSE	0.00900479	-0.641886	FALSE
Chr_2	94734	96017	-	1284	NCAS_0B00660	1.19903e-31	2.46627	TRUE	1.00115e-32	2.87781	TRUE	1.0096e-48	2.37735	TRUE	3.274e-22	1.61354	TRUE
Chr_2	96654	101174	+	4521	NCAS_0B00670	0.319118	0.164011	FALSE	2.76513e-32	1.73859	TRUE	0.941609	-0.0316238	FALSE	0.0670736	-0.27931	FALSE
Chr_2	101261	102229	-	969	NCAS_0B00680	0.00385502	0.465832	FALSE	7.98557e-35	2.05063	TRUE	0.708437	0.132089	FALSE	0.414781	-0.155822	FALSE
Chr_2	102718	103483	+	766	NCAS_0B00690	0.936433	-0.0197153	FALSE	0.000164783	0.598097	FALSE	0.612174	-0.149515	FALSE	0.0458532	-0.329321	FALSE
Chr_2	103927	104538	+	612	NCAS_0B00700	0.921604	0.0498148	FALSE	0.00350801	0.870916	FALSE	0.779957	-0.104392	FALSE	0.00270909	-0.485435	FALSE
Chr_2	104776	105525	+	750	NCAS_0B00710	2.1973e-08	1.22471	TRUE	6.24158e-11	1.63813	TRUE	5.48189e-11	1.05869	TRUE	0.00228991	0.536215	FALSE
Chr_2	105858	109676	+	3819	NCAS_0B00720	1.28537e-07	0.770004	FALSE	2.05516e-13	1.2482	TRUE	0.00246073	0.482224	FALSE	0.309042	0.176797	FALSE
Chr_2	110836	112023	+	1188	NCAS_0B00730	5.49774e-20	1.3998	TRUE	1.10434e-26	1.92082	TRUE	8.42247e-09	1.30605	TRUE	3.02965e-09	1.34795	TRUE
Chr_2	112752	113768	+	1017	NCAS_0B00740	0.0484822	0.389732	FALSE	4.69369e-09	1.15931	TRUE	0.860751	0.0739471	FALSE	0.24321	-0.205919	FALSE
Chr_2	114429	115097	-	669	NCAS_0B00750	0.399975	0.135295	FALSE	2.02174e-31	1.53539	TRUE	0.770774	-0.103677	FALSE	0.22855	-0.20927	FALSE
Chr_2	115196	116620	+	1425	NCAS_0B00760	0.00183778	2.03087	TRUE	3.39127e-06	3.03123	TRUE	2.18786e-09	2.751	TRUE	0.00236493	1.55817	TRUE
Chr_2	116910	119099	+	2190	NCAS_0B00770	0.837182	-0.0415394	FALSE	4.09784e-21	1.43278	TRUE	0.532745	-0.156719	FALSE	0.0110102	-0.381639	FALSE
Chr_2	119384	120802	+	1419	NCAS_0B00780	0.971048	-0.000668758	FALSE	2.30272e-22	1.64928	TRUE	0.550681	-0.179053	FALSE	0.0385557	-0.37363	FALSE
Chr_2	121474	121551	+	78	NCAS_0B00790	4.65018e-33	2.13218	TRUE	1.22816e-37	2.75381	TRUE	1.21331e-26	1.67818	TRUE	4.23697e-10	1.01329	TRUE
Chr_2	121672	122871	+	1200	NCAS_0B00800	1.18202e-43	1.63647	TRUE	6.43748e-58	2.31281	TRUE	2.09975e-20	1.45031	TRUE	9.67349e-19	1.38994	TRUE
Chr_2	123148	126330	+	3183	NCAS_0B00810	0.182162	-0.249933	FALSE	6.73822e-16	1.48984	TRUE	0.831261	-0.0832345	FALSE	0.00108189	-0.5151	FALSE
Chr_2	126597	126812	-	216	NCAS_0B00820	5.59022e-36	1.77348	TRUE	4.42172e-17	1.44609	TRUE	1.23013e-25	1.54759	TRUE	7.81279e-16	1.21875	TRUE
Chr_2	126984	127718	+	735	NCAS_0B00830	2.60047e-31	2.17778	TRUE	8.50796e-24	2.22621	TRUE	1.04505e-24	1.84575	TRUE	2.07678e-14	1.40824	TRUE
Chr_2	127806	129479	-	1674	NCAS_0B00840	0.0967371	0.34339	FALSE	2.58919e-28	2.26967	TRUE	0.979784	0.0129907	FALSE	0.597342	0.101058	FALSE
Chr_2	129951	131294	-	1344	NCAS_0B00850	0.0290672	0.439231	FALSE	9.43659e-29	2.23917	TRUE	0.667313	0.146837	FALSE	0.525148	0.128418	FALSE
Chr_2	131557	133263	-	1707	NCAS_0B00860	0.000127767	0.65056	FALSE	5.4842e-16	1.52572	TRUE	0.000306488	0.576141	FALSE	0.435756	0.14406	FALSE
Chr_2	133660	135207	-	1548	NCAS_0B00870	0.638407	-0.118328	FALSE	0.00220421	0.633068	FALSE	0.778895	-0.101516	FALSE	0.173881	-0.228801	FALSE
Chr_2	135742	136632	-	891	NCAS_0B00880	0.952289	0.0178789	FALSE	6.61732e-37	2.02366	TRUE	0.604597	-0.15408	FALSE	0.00205583	-0.501341	FALSE
Chr_2	136976	137416	-	441	NCAS_0B00890	0.951135	-0.011881	FALSE	2.57815e-07	0.646199	FALSE	0.972928	-0.0219109	FALSE	0.630964	0.126929	FALSE
Chr_2	138430	139677	-	1248	NCAS_0B00900	0.10736	0.528854	FALSE	1.18451e-26	3.10794	TRUE	0.154641	0.577763	FALSE	0.790289	-0.111291	FALSE
Chr_2	140695	141729	+	1035	NCAS_0B00910	0.861565	-0.0375006	FALSE	9.47293e-31	1.82125	TRUE	0.157446	-0.282718	FALSE	6.37979e-05	-0.628899	FALSE
Chr_2	142077	143411	-	1335	NCAS_0B00920	0.30423	-0.160896	FALSE	2.41874e-16	1.19855	TRUE	0.662782	-0.174501	FALSE	0.856088	-0.0478386	FALSE
Chr_2	145847	146875	-	1029	NCAS_0B00930	0.0231233	0.669091	FALSE	4.71727e-63	4.36024	TRUE	0.00409414	1.2495	TRUE	1.29574e-06	1.95312	TRUE
Chr_2	150330	150989	+	660	NCAS_0B00950	5.63655e-29	1.91957	TRUE	7.27342e-47	2.85205	TRUE	1.73911e-13	1.34573	TRUE	7.82226e-05	0.770057	FALSE
Chr_2	150982	152469	-	1488	NCAS_0B00960	3.22904e-12	1.48277	TRUE	6.95449e-37	2.91042	TRUE	8.03654e-15	1.41988	TRUE	2.74584e-09	1.13079	TRUE
Chr_2	153146	153328	+	183	NCAS_0B00970	0.53235	-0.224932	FALSE	1.01185e-11	3.2567	TRUE	0.962452	0.0792738	FALSE	0.762297	0.258715	FALSE
Chr_2	153548	154576	-	1029	NCAS_0B00980	0.259616	0.225995	FALSE	4.70671e-22	1.77934	TRUE	0.974742	-0.0161923	FALSE	0.00251441	-0.558114	FALSE
Chr_2	154925	156103	-	1179	NCAS_0B00990	0.819126	0.0709439	FALSE	2.39881e-25	1.92392	TRUE	0.81808	-0.0933905	FALSE	0.00535658	-0.471513	FALSE
Chr_2	156442	159897	-	3456	NCAS_0B01000	0.446062	0.131262	FALSE	3.98154e-12	1.04051	TRUE	0.864218	-0.0726411	FALSE	0.153829	-0.249547	FALSE
Chr_2	160416	160955	+	540	NCAS_0B01010	0.108773	0.280661	FALSE	2.17601e-11	1.09131	TRUE	0.980539	0.0170659	FALSE	0.633916	-0.125379	FALSE
Chr_2	161030	162634	-	1605	NCAS_0B01020	0.271479	0.21729	FALSE	2.35845e-15	1.37253	TRUE	0.762092	-0.112652	FALSE	0.00612425	-0.46029	FALSE
Chr_2	163625	164638	+	1014	NCAS_0B01030	9.09706e-05	0.796585	FALSE	1.3282e-14	1.70853	TRUE	0.0248855	0.462976	FALSE	0.606824	0.122092	FALSE
Chr_2	165549	170525	+	4977	NCAS_0B01040	0.721101	0.0716046	FALSE	1.05312e-25	1.59173	TRUE	0.82896	-0.0847966	FALSE	0.00872532	-0.417601	FALSE
Chr_2	171520	174942	+	3423	NCAS_0B01050	1.7933e-26	1.45038	TRUE	1.23872e-21	1.57372	TRUE	3.66635e-16	1.12851	TRUE	1.23451e-08	0.809703	FALSE
Chr_2	175811	176611	+	801	NCAS_0B01060	0.255288	0.203305	FALSE	1.41226e-10	1.0414	TRUE	0.874591	0.0826863	FALSE	0.889017	0.0361154	FALSE
Chr_2	176912	177583	-	672	NCAS_0B01070	0.522058	0.139992	FALSE	1.82029e-10	1.12254	TRUE	0.921803	-0.044475	FALSE	0.310278	-0.175045	FALSE
Chr_2	178206	179261	+	1056	NCAS_0B01080	0.0219175	0.427878	FALSE	5.67956e-38	2.35447	TRUE	0.301777	0.253345	FALSE	0.562589	-0.12268	FALSE
Chr_2	180367	181554	+	1188	NCAS_0B01090	0.000406454	-0.539305	FALSE	3.11405e-09	1.01768	TRUE	0.158577	-0.374805	FALSE	0.314741	-0.239871	FALSE
Chr_2	181912	182259	-	348	NCAS_0B01100	0.0169948	0.395179	FALSE	2.29039e-20	1.55475	TRUE	0.780853	-0.102746	FALSE	0.0100831	-0.419727	FALSE
Chr_2	182537	185518	-	2982	NCAS_0B01110	0.659692	-0.0962303	FALSE	5.57075e-12	1.31449	TRUE	0.885443	-0.0659806	FALSE	0.240214	-0.215192	FALSE
Chr_2	186143	187036	+	894	NCAS_0B01120	0.663126	0.0932462	FALSE	3.18531e-05	0.641773	FALSE	0.784016	-0.100843	FALSE	0.617013	-0.0961896	FALSE
Chr_2	187189	190113	-	2925	NCAS_0B01130	0.999165	0.00296529	FALSE	1.39449e-34	1.90175	TRUE	0.792336	-0.0879658	FALSE	0.00428547	-0.410149	FALSE
Chr_2	190534	192147	-	1614	NCAS_0B01140	0.710117	0.0805401	FALSE	9.23775e-17	1.35229	TRUE	0.885443	-0.0673778	FALSE	0.507846	-0.131275	FALSE
Chr_2	192406	193686	+	1281	NCAS_0B01150	0.95147	-0.0128019	FALSE	5.7807e-08	0.832226	FALSE	0.895121	-0.0667918	FALSE	0.151391	-0.27363	FALSE
Chr_2	193743	194396	-	654	NCAS_0B01160	1.13536e-07	0.937984	FALSE	3.71322e-18	1.7104	TRUE	0.00145746	0.54699	FALSE	0.308829	0.196267	FALSE
Chr_2	195160	197415	+	2256	NCAS_0B01170	0.285184	0.19639	FALSE	3.03096e-21	1.5793	TRUE	0.963918	0.0227296	FALSE	0.0217191	-0.37148	FALSE
Chr_2	197618	198130	-	513	NCAS_0B01180	5.76283e-10	0.967465	FALSE	5.30387e-16	1.46859	TRUE	0.00269926	0.496714	FALSE	0.76061	0.0632881	FALSE
Chr_2	198320	198916	-	597	NCAS_0B01190	0.553659	0.163825	FALSE	3.14159e-08	1.17981	TRUE	0.92752	-0.0480664	FALSE	0.171336	-0.26672	FALSE
Chr_2	199223	200155	+	933	NCAS_0B01200	0.150701	0.222331	FALSE	2.93066e-26	1.58077	TRUE	0.979784	-0.0165475	FALSE	0.36337	0.232119	FALSE
Chr_2	200384	201736	+	1353	NCAS_0B01210	0.533698	0.134591	FALSE	1.59187e-32	1.93742	TRUE	0.780576	-0.101887	FALSE	0.144978	-0.248345	FALSE
Chr_2	202044	204014	+	1971	NCAS_0B01220	3.07113e-10	0.861573	FALSE	6.294e-34	1.92219	TRUE	5.10891e-05	0.627875	FALSE	0.110131	0.270694	FALSE
Chr_2	204236	204916	-	681	NCAS_0B01230	0.541917	0.143905	FALSE	0.103866	0.325447	FALSE	0.741668	-0.147617	FALSE	0.148256	0.318802	FALSE
Chr_2	205507	207336	-	1830	NCAS_0B01240	3.46039e-07	0.761632	FALSE	6.39872e-12	1.19858	TRUE	0.00596708	0.386677	FALSE	0.0604163	0.265328	FALSE
Chr_2	207604	208584	+	981	NCAS_0B01250	0.933663	-0.0340184	FALSE	3.98731e-12	1.51719	TRUE	0.478517	-0.199744	FALSE	0.898384	0.0290621	FALSE
Chr_2	208785	212144	+	3360	NCAS_0B01260	0.845745	-0.0459045	FALSE	4.94064e-06	0.766636	FALSE	0.93897	-0.0394989	FALSE	0.616994	-0.100186	FALSE
Chr_2	212581	212688	+	108	NCAS_0B01270	0.00185909	1.48532	TRUE	2.98794e-05	2.05383	TRUE	0.401388	0.623317	FALSE	0.703121	0.246969	FALSE
Chr_2	212982	213834	-	853	NCAS_0B01280	0.00315368	0.459297	FALSE	7.91922e-14	1.2375	TRUE	0.467628	0.197639	FALSE	0.880419	0.0344471	FALSE
Chr_2	214089	214589	-	501	NCAS_0B01290	0.244941	0.617075	FALSE	0.000330879	1.89741	TRUE	0.953239	0.0866169	FALSE	0.144459	-0.80815	FALSE
Chr_2	214869	215429	-	561	NCAS_0B01300	0.202675	0.23063	FALSE	1.02583e-08	1.01651	TRUE	1	0.00101948	FALSE	0.546879	-0.123633	FALSE
Chr_2	215645	217108	-	1464	NCAS_0B01310	0.497488	0.164673	FALSE	8.16923e-08	1.03902	TRUE	0.862031	0.0767704	FALSE	0.00728424	-0.460074	FALSE
Chr_2	217380	219995	+	2616	NCAS_0B01320	0.999162	0.00391788	FALSE	2.97009e-10	1.06018	TRUE	0.904465	-0.0657546	FALSE	0.658854	-0.10081	FALSE
Chr_2	220090	220701	-	612	NCAS_0B01330	0.945612	-0.0996582	FALSE	1.75102e-05	3.39418	TRUE	0.823452	-0.583421	FALSE	0.691925	0.524261	FALSE
Chr_2	221045	221845	+	801	NCAS_0B01340	0.750294	0.0795944	FALSE	1.29264e-12	1.25206	TRUE	0.788973	-0.111727	FALSE	0.323006	-0.199026	FALSE
Chr_2	221907	222935	-	1029	NCAS_0B01350	0.402619	0.18943	FALSE	1.57868e-37	2.23406	TRUE	0.0542882	0.623615	FALSE	2.4826e-10	1.68912	TRUE
Chr_2	223374	224294	+	921	NCAS_0B01360	9.82792e-22	1.29732	TRUE	7.89431e-61	2.65219	TRUE	7.90455e-10	1.11946	TRUE	2.65187e-16	1.46972	TRUE
Chr_2	224613	225479	+	867	NCAS_0B01370	0.089957	0.325695	FALSE	7.6176e-23	1.73387	TRUE	0.8236	0.0983362	FALSE	0.794076	0.059157	FALSE
Chr_2	225534	225977	-	444	NCAS_0B01380	0.995281	0.00284994	FALSE	0.000182188	0.810902	FALSE	0.963918	0.0258542	FALSE	0.418624	-0.160998	FALSE
Chr_2	226306	226788	-	483	NCAS_0B01390	0.779837	-0.0589563	FALSE	4.29851e-28	1.8164	TRUE	0.839163	0.263189	FALSE	0.000306987	1.82018	TRUE
Chr_2	227497	231096	+	3600	NCAS_0B01400	1.07379e-33	1.65311	TRUE	1.45384e-17	1.4177	TRUE	2.76373e-12	0.984556	FALSE	6.21187e-06	0.661158	FALSE
Chr_2	231145	232053	-	909	NCAS_0B01410	5.66175e-12	1.1008	TRUE	1.27601e-31	2.08911	TRUE	7.24839e-09	1.04607	TRUE	5.99297e-05	0.762428	FALSE
Chr_2	232296	233480	-	1185	NCAS_0B01420	0.290893	-0.238373	FALSE	6.70247e-14	1.58628	TRUE	0.807955	-0.106653	FALSE	0.466849	-0.159849	FALSE
Chr_2	233965	235317	+	1353	NCAS_0B01430	0.48908	0.160414	FALSE	2.39388e-11	1.29467	TRUE	0.910669	0.0763013	FALSE	0.130277	0.370401	FALSE
Chr_2	236104	237390	+	1287	NCAS_0B01440	0.886387	0.0380299	FALSE	3.98126e-09	0.99693	FALSE	0.943353	0.049131	FALSE	0.0213915	0.54188	FALSE
Chr_2	237824	239341	+	1518	NCAS_0B01450	0.963503	-0.00529929	FALSE	4.80038e-15	1.35995	TRUE	0.953239	0.0389558	FALSE	0.98994	-0.00332306	FALSE
Chr_2	239615	240304	+	690	NCAS_0B01460	0.48297	0.120372	FALSE	3.83768e-14	1.09294	TRUE	0.95281	-0.0359946	FALSE	0.821343	0.0553206	FALSE
Chr_2	241003	243186	+	2184	NCAS_0B01470	0.858146	0.0475393	FALSE	2.58897e-29	1.87769	TRUE	0.814362	-0.0952334	FALSE	0.0620658	-0.326171	FALSE
Chr_2	243457	244250	-	794	NCAS_0B01480	0.822059	0.040745	FALSE	8.4782e-09	0.736609	FALSE	0.978299	-0.0181111	FALSE	0.319558	0.244263	FALSE
Chr_2	245361	245825	-	465	NCAS_0B01490	0.663596	0.137406	FALSE	1.90608e-16	1.63424	TRUE	0.789466	-0.106884	FALSE	0.00231962	-0.535217	FALSE
Chr_2	246019	246666	+	648	NCAS_0B01500	7.33298e-05	0.607089	FALSE	3.3639e-16	1.37789	TRUE	0.542795	0.188636	FALSE	0.38337	-0.177442	FALSE
Chr_2	247198	248499	+	1302	NCAS_0B01510	1.84957e-09	0.908794	FALSE	1.0846e-35	2.20872	TRUE	5.40041e-06	0.705595	FALSE	0.0162643	0.394917	FALSE
Chr_2	248724	249611	+	888	NCAS_0B01520	1.23444e-09	1.04245	TRUE	5.91066e-22	1.8851	TRUE	7.46261e-05	0.654311	FALSE	0.0600274	0.334839	FALSE
Chr_2	249743	252349	-	2607	NCAS_0B01530	0.957294	-0.00255861	FALSE	1.98103e-13	5.40922	TRUE	0.990067	0.050485	FALSE	0.28512	-1.23581	FALSE
Chr_2	252693	253556	+	864	NCAS_0B01540	0.144472	0.231191	FALSE	9.84659e-13	1.08198	TRUE	0.904419	0.0617157	FALSE	0.705318	0.0807132	FALSE
Chr_2	255190	255876	+	687	NCAS_0B01560	0.0668685	1.25152	FALSE	2.02403e-09	4.12338	TRUE	0.295192	1.1392	FALSE	0.120459	1.3743	FALSE
Chr_2	256675	257355	+	681	NCAS_0B01570	0.845796	0.0447805	FALSE	3.53587e-19	1.3751	TRUE	0.909095	-0.0530113	FALSE	0.0939316	-0.28123	FALSE
Chr_2	259518	260993	+	1476	NCAS_0B01590	0.534396	0.139022	FALSE	6.63881e-19	1.48279	TRUE	0.88106	0.0744343	FALSE	0.391885	-0.173563	FALSE
Chr_2	261098	262219	-	1122	NCAS_0B01600	0.131477	0.385114	FALSE	1.51436e-08	1.37028	TRUE	0.0443669	0.495271	FALSE	0.444275	-0.198111	FALSE
Chr_2	262494	264524	-	2031	NCAS_0B01610	0.529962	0.151712	FALSE	5.70557e-11	1.30371	TRUE	0.577918	0.147015	FALSE	0.64803	-0.0821216	FALSE
Chr_2	264769	266115	+	1347	NCAS_0B01620	0.955226	-0.000117207	FALSE	4.3098e-17	1.50359	TRUE	0.852465	-0.0744169	FALSE	0.36833	-0.162416	FALSE
Chr_2	266175	267488	-	1314	NCAS_0B01630	4.69114e-08	0.712937	FALSE	3.1439e-15	1.19576	TRUE	0.00978693	0.496878	FALSE	1.6846e-05	0.760938	FALSE
Chr_2	268028	268750	+	723	NCAS_0B01640	0.469109	0.248901	FALSE	4.91359e-16	1.97557	TRUE	0.862632	0.304632	FALSE	0.113309	1.12702	FALSE
Chr_2	268950	269963	+	1014	NCAS_0B01650	0.121817	0.339087	FALSE	6.79638e-17	1.67184	TRUE	0.86237	-0.0815674	FALSE	0.0127799	-0.464567	FALSE
Chr_2	270046	271320	-	1275	NCAS_0B01660	0.0133178	0.442949	FALSE	7.53003e-21	1.76883	TRUE	0.850147	0.0822724	FALSE	0.819572	-0.0491551	FALSE
Chr_2	272410	275085	+	2676	NCAS_0B01670	0.82255	-0.0490374	FALSE	4.12073e-26	1.71294	TRUE	0.808761	-0.0888598	FALSE	0.0539582	-0.307161	FALSE
Chr_2	275363	275575	-	213	NCAS_0B01680	0.00510115	0.483293	FALSE	1.34771e-06	0.908422	FALSE	0.0698397	0.291675	FALSE	0.668284	-0.073437	FALSE
Chr_2	275842	277128	+	1287	NCAS_0B01690	0.0365186	0.467154	FALSE	8.03662e-08	1.27959	TRUE	0.820746	0.118499	FALSE	0.539241	0.153926	FALSE
Chr_2	277672	281124	+	3453	NCAS_0B01700	0.581909	0.116771	FALSE	1.02663e-12	1.2327	TRUE	0.972928	-0.0154364	FALSE	0.14911	-0.238927	FALSE
Chr_2	281677	283785	-	2109	NCAS_0B01710	0.795647	-0.121638	FALSE	0.00116125	1.13361	TRUE	0.792448	-0.102792	FALSE	0.00403644	-0.480838	FALSE
Chr_2	284033	285691	+	1659	NCAS_0B01720	0.000636419	0.687481	FALSE	6.47891e-16	1.76866	TRUE	0.00591298	0.496952	FALSE	0.447284	0.153433	FALSE
Chr_2	286249	288105	-	1857	NCAS_0B01730	0.299267	0.158567	FALSE	6.8354e-25	1.45421	TRUE	0.717718	0.177605	FALSE	0.000205748	0.844197	FALSE
Chr_2	288320	288997	-	678	NCAS_0B01740	0.654199	-0.273336	FALSE	0.00360891	1.41884	TRUE	0.782524	-0.162024	FALSE	0.000152784	0.940036	FALSE
Chr_2	289194	290450	+	1257	NCAS_0B01750	9.54632e-05	1.29897	TRUE	9.97711e-07	1.85999	TRUE	2.41089e-17	1.69353	TRUE	6.84996e-31	2.28745	TRUE
Chr_2	290690	292162	+	1473	NCAS_0B01760	0.774808	-0.0644913	FALSE	0.0193595	0.399978	FALSE	0.433775	-0.188747	FALSE	1.61386e-05	-0.648104	FALSE
Chr_2	292353	293642	-	1290	NCAS_0B01770	0.153704	0.284908	FALSE	8.23259e-14	1.46694	TRUE	0.794664	0.109177	FALSE	0.0269682	0.402113	FALSE
Chr_2	293821	294996	+	1176	NCAS_0B01780	0.0987718	0.291983	FALSE	8.26523e-19	1.59576	TRUE	0.548554	0.216721	FALSE	0.0131036	0.526283	FALSE
Chr_2	295450	296169	-	720	NCAS_0B01790	0.707386	-0.378976	FALSE	0.000296908	2.98621	TRUE	0.662782	1.37509	FALSE	1	0	FALSE
Chr_2	296677	299052	-	2376	NCAS_0B01800	0.847883	-0.0196315	FALSE	6.7909e-06	1.20028	TRUE	0.912621	-0.0516861	FALSE	0.000136576	-0.616773	FALSE
Chr_2	299214	300263	-	1050	NCAS_0B01810	1.06861e-05	0.715188	FALSE	5.58897e-23	1.75581	TRUE	0.0188762	0.60457	FALSE	0.00567047	0.66804	FALSE
Chr_2	300431	301165	+	735	NCAS_0B01820	0.58751	0.128645	FALSE	1.05876e-29	2.06466	TRUE	0.817798	-0.107899	FALSE	0.471079	-0.158954	FALSE
Chr_2	301292	302650	-	1359	NCAS_0B01830	0.0125466	0.357572	FALSE	6.57767e-20	1.37028	TRUE	0.232546	0.251407	FALSE	0.967673	0.00986903	FALSE
Chr_2	302806	303204	-	399	NCAS_0B01840	0.24287	0.312114	FALSE	2.19913e-08	1.28972	TRUE	0.23022	0.486737	FALSE	0.000816773	1.02053	TRUE
Chr_2	303472	304617	+	1146	NCAS_0B01850	0.147778	0.288892	FALSE	2.28496e-22	1.79761	TRUE	0.8778	0.0736008	FALSE	0.0287027	-0.403333	FALSE
Chr_2	304736	306832	-	2097	NCAS_0B01860	0.820527	0.0480607	FALSE	0.441955	0.116835	FALSE	0.986292	0.0123852	FALSE	0.49833	-0.163139	FALSE
Chr_2	307045	308784	-	1740	NCAS_0B01870	0.402598	0.140796	FALSE	6.36091e-16	1.17821	TRUE	0.751972	0.170418	FALSE	0.0231855	0.562232	FALSE
Chr_2	308967	309623	+	657	NCAS_0B01880	0.341329	0.172959	FALSE	2.77882e-05	0.674204	FALSE	0.7916	-0.0976241	FALSE	0.000195253	-0.577635	FALSE
Chr_2	309801	311519	-	1719	NCAS_0B01890	0.605213	0.203976	FALSE	1.30276e-06	1.55111	TRUE	0.804698	0.118105	FALSE	0.0187076	0.472172	FALSE
Chr_2	311774	312235	-	462	NCAS_0B01900	0.00615583	0.411955	FALSE	5.57082e-09	0.954811	FALSE	0.417149	0.487973	FALSE	0.000135437	1.46395	TRUE
Chr_2	312479	313456	+	978	NCAS_0B01910	0.449769	0.145105	FALSE	4.91554e-42	2.22111	TRUE	0.95281	0.0863725	FALSE	0.0104142	1.15355	TRUE
Chr_2	313760	314749	+	990	NCAS_0B01920	0.010155	0.420264	FALSE	1.44803e-22	1.6718	TRUE	0.621566	0.215741	FALSE	0.0464498	0.480004	FALSE
Chr_2	315008	316399	+	1392	NCAS_0B01930	0.503496	0.151766	FALSE	7.18169e-08	1.00762	TRUE	0.945356	-0.0332004	FALSE	0.211792	-0.220888	FALSE
Chr_2	316633	316980	-	348	NCAS_0B01940	0.108359	0.248029	FALSE	7.01436e-13	1.10397	TRUE	0.897044	0.0924061	FALSE	0.000209004	0.890174	FALSE
Chr_2	317192	318571	+	1380	NCAS_0B01950	8.082e-06	0.680707	FALSE	1.79652e-11	1.16048	TRUE	0.00103746	0.542949	FALSE	0.104381	0.284707	FALSE
Chr_2	319127	319360	-	234	NCAS_0B01960	6.26737e-36	2.30258	TRUE	4.11371e-20	2.02547	TRUE	2.4851e-28	2.01556	TRUE	1.58522e-22	1.80528	TRUE
Chr_2	319704	320516	-	813	NCAS_0B01970	0.0564353	0.346977	FALSE	2.74313e-06	0.868973	FALSE	0.99791	0.00278952	FALSE	0.0148556	-0.375967	FALSE
Chr_2	320796	322160	-	1365	NCAS_0B01980	0.984178	-0.00504716	FALSE	2.82764e-13	1.09705	TRUE	0.579323	-0.160268	FALSE	0.0584203	-0.320079	FALSE
Chr_2	322573	325218	-	2646	NCAS_0B01990	0.354972	0.183748	FALSE	1.50618e-29	1.86782	TRUE	0.752455	-0.113333	FALSE	0.00142173	-0.517846	FALSE
Chr_2	325945	327885	+	1941	NCAS_0B02000	0.76505	-0.127482	FALSE	0.000779324	1.07978	TRUE	0.864603	-0.0686526	FALSE	0.203259	-0.213212	FALSE
Chr_2	328296	329888	+	1593	NCAS_0B02010	2.08055e-13	2.56689	TRUE	9.07578e-18	3.20811	TRUE	1.81473e-14	1.98118	TRUE	2.83058e-08	1.51277	TRUE
Chr_2	330139	330663	-	525	NCAS_0B02020	0.930005	-0.020427	FALSE	0.0021402	0.456429	FALSE	0.979784	-0.019576	FALSE	0.369377	0.254275	FALSE
Chr_2	332072	333613	-	1542	NCAS_0B02030	1.65356e-15	1.04166	TRUE	9.16854e-29	1.73168	TRUE	0.000271413	0.834603	FALSE	6.84822e-07	1.09661	TRUE
Chr_2	335075	336040	+	966	NCAS_0B02040	1.67459e-10	1.34332	TRUE	2.15731e-11	1.62868	TRUE	1.18324e-10	1.12027	TRUE	1.17451e-06	0.878563	FALSE
Chr_2	336312	337997	-	1686	NCAS_0B02050	0.998161	0.00420249	FALSE	5.6142e-13	1.43632	TRUE	0.994012	-0.00481565	FALSE	0.610116	-0.110296	FALSE
Chr_2	338287	340074	+	1788	NCAS_0B02060	2.36642e-07	0.879742	FALSE	1.09363e-20	1.77956	TRUE	0.00146895	0.569473	FALSE	0.396049	0.173296	FALSE
Chr_2	340204	341058	-	855	NCAS_0B02070	0.271479	0.237796	FALSE	2.94495e-10	1.17587	TRUE	0.915849	0.0484262	FALSE	0.0556912	-0.311542	FALSE
Chr_2	341456	344062	+	2607	NCAS_0B02080	0.00161019	0.420674	FALSE	2.22311e-27	1.57647	TRUE	0.907522	0.0555731	FALSE	0.524502	-0.120789	FALSE
Chr_2	344167	345579	-	1413	NCAS_0B02090	0.0306024	0.451255	FALSE	4.92548e-18	1.83857	TRUE	0.200246	0.26935	FALSE	0.571843	0.11089	FALSE
Chr_2	346282	347178	+	897	NCAS_0B02100	0.387403	0.145116	FALSE	3.13272e-26	1.5455	TRUE	0.473224	-0.193963	FALSE	0.747819	-0.067678	FALSE
Chr_2	347303	347743	-	441	NCAS_0B02110	0.0855133	0.635998	FALSE	1.40794e-11	2.18902	TRUE	0.772722	0.149667	FALSE	0.132673	-0.362811	FALSE
Chr_2	348080	349057	+	978	NCAS_0B02120	0.730418	0.0650462	FALSE	0.000117291	0.559381	FALSE	0.960607	0.0368641	FALSE	0.107965	0.391042	FALSE
Chr_2	349853	350749	+	897	NCAS_0B02130	0.936473	0.0157451	FALSE	4.45185e-09	0.726784	FALSE	0.964691	0.0557989	FALSE	0.127018	0.657308	FALSE
Chr_2	351300	352424	+	1125	NCAS_0B02140	0.559803	0.126258	FALSE	1.1378e-19	1.51202	TRUE	0.934857	0.0433527	FALSE	0.851916	-0.0406785	FALSE
Chr_2	352667	353323	-	657	NCAS_0B02150	0.532071	0.189725	FALSE	9.26646e-16	1.73307	TRUE	0.623854	-0.171326	FALSE	0.189232	-0.270052	FALSE
Chr_2	353588	353935	+	348	NCAS_0B02160	1.30451e-20	1.59921	TRUE	2.58074e-35	2.43364	TRUE	6.86988e-08	1.0427	TRUE	1.60426e-05	0.864511	FALSE
Chr_2	354274	355518	-	1245	NCAS_0B02170	0.00948707	0.485713	FALSE	2.14946e-13	1.42795	TRUE	0.42867	0.218555	FALSE	0.836842	0.0484858	FALSE
Chr_2	355823	357655	-	1833	NCAS_0B02180	0.867875	0.0350461	FALSE	9.86497e-07	0.700731	FALSE	0.920811	0.129762	FALSE	0.00861608	1.17519	TRUE
Chr_2	357854	358642	-	789	NCAS_0B02190	2.92043e-07	0.989044	FALSE	2.5085e-12	1.56114	TRUE	2.27603e-05	1.23157	TRUE	2.38247e-19	2.45915	TRUE
Chr_2	359080	361548	-	2469	NCAS_0B02200	0.902949	-0.0255592	FALSE	5.43097e-19	1.3864	TRUE	0.751972	-0.114844	FALSE	0.269184	-0.199357	FALSE
Chr_2	362026	363504	+	1479	NCAS_0B02210	0.976779	-0.000743687	FALSE	3.00553e-20	1.4103	TRUE	0.271583	-0.220949	FALSE	2.59174e-05	-0.609027	FALSE
Chr_2	363992	365656	+	1665	NCAS_0B02220	0.917055	0.0340463	FALSE	4.05744e-18	1.54226	TRUE	0.71911	-0.116642	FALSE	0.0149661	-0.380893	FALSE
Chr_2	366548	367174	+	627	NCAS_0B02230	0.0190319	0.484077	FALSE	4.36512e-14	1.56266	TRUE	0.950825	-0.0370668	FALSE	0.010059	-0.503359	FALSE
Chr_2	368656	371223	+	2568	NCAS_0B02240	1.91148e-09	0.717494	FALSE	3.70228e-47	2.02635	TRUE	0.00369542	0.476155	FALSE	0.207941	0.218162	FALSE
Chr_2	371764	374436	+	2673	NCAS_0B02250	2.17162e-17	1.13654	TRUE	5.47456e-16	1.30188	TRUE	4.35426e-09	0.881894	FALSE	8.47902e-05	0.616405	FALSE
Chr_2	374788	375879	-	1092	NCAS_0B02260	0.005301	0.463029	FALSE	6.76422e-32	2.03151	TRUE	0.741668	0.116195	FALSE	0.242335	-0.208935	FALSE
Chr_2	376160	377413	+	1254	NCAS_0B02270	0.468988	0.123391	FALSE	3.58276e-09	0.852532	FALSE	0.784246	-0.0976509	FALSE	0.0162744	-0.375842	FALSE
Chr_2	377630	383134	-	5505	NCAS_0B02280	1.10969e-77	2.6033	TRUE	2.10253e-27	1.85805	TRUE	4.60088e-69	2.47977	TRUE	9.42007e-59	2.29049	TRUE
Chr_2	383984	384403	+	420	NCAS_0B02290	1.98883e-06	1.31402	TRUE	3.68993e-12	2.06323	TRUE	1.44933e-05	1.26982	TRUE	3.79682e-06	1.36487	TRUE
Chr_2	384874	386469	-	1596	NCAS_0B02300	3.75408e-39	1.85984	TRUE	1.49692e-22	1.68627	TRUE	2.65013e-36	1.72309	TRUE	6.05123e-23	1.3693	TRUE
Chr_2	387031	387228	-	198	NCAS_0B02310	0.864403	-0.0367837	FALSE	4.6709e-07	0.965614	FALSE	0.649277	0.172716	FALSE	0.400962	-0.187408	FALSE
Chr_2	387930	389345	+	1416	NCAS_0B02320	0.990854	0.00414742	FALSE	5.27964e-08	0.827675	FALSE	0.940591	-0.0550113	FALSE	0.00187525	0.754408	FALSE
Chr_2	389560	390684	-	1125	NCAS_0B02330	0.507439	-0.11964	FALSE	7.25886e-17	1.32279	TRUE	0.398988	-0.237465	FALSE	0.208899	-0.255683	FALSE
Chr_2	391384	393528	-	2145	NCAS_0B02340	0.960549	0.0192785	FALSE	4.13279e-20	1.47681	TRUE	0.931287	-0.0451779	FALSE	0.0136381	-0.442543	FALSE
Chr_2	394128	395018	-	891	NCAS_0B02350	0.686528	0.089823	FALSE	9.97386e-12	1.1121	TRUE	0.970446	-0.0198248	FALSE	0.159492	-0.272779	FALSE
Chr_2	395296	396330	-	1035	NCAS_0B02360	0.294135	0.168464	FALSE	4.9262e-06	0.676078	FALSE	0.901746	-0.0543196	FALSE	0.0536372	-0.305524	FALSE
Chr_2	396654	398117	-	1464	NCAS_0B02370	0.202585	0.237123	FALSE	6.8354e-25	1.81	TRUE	0.981053	-0.0113204	FALSE	0.000270281	-0.550015	FALSE
Chr_2	399296	400186	+	891	NCAS_0B02380	1.51849e-10	1.119	TRUE	9.72356e-34	2.45219	TRUE	2.32579e-14	0.989288	FALSE	0.000122649	0.530806	FALSE
Chr_2	400398	402602	+	2205	NCAS_0B02390	0.619401	0.1182	FALSE	7.3192e-12	1.27389	TRUE	0.93209	0.046076	FALSE	0.0877777	-0.316813	FALSE
Chr_2	402763	403905	-	1143	NCAS_0B02400	0.979906	0.0235413	FALSE	7.72632e-09	1.41319	TRUE	0.877233	-0.0663815	FALSE	0.000164083	-0.592465	FALSE
Chr_2	404150	405574	-	1425	NCAS_0B02410	0.977896	-0.00550232	FALSE	0.000219914	0.522679	FALSE	0.603285	-0.151133	FALSE	0.231234	-0.207251	FALSE
Chr_2	405726	406265	+	540	NCAS_0B02420	1.14063e-13	1.32758	TRUE	0.000385112	0.771858	FALSE	2.20676e-08	1.06794	TRUE	1.08838e-07	1.02508	TRUE
Chr_2	406422	408059	+	1638	NCAS_0B02430	0.0235891	0.329545	FALSE	1.49316e-06	0.742278	FALSE	0.53667	0.168295	FALSE	0.414781	-0.147734	FALSE
Chr_2	408198	409400	-	1203	NCAS_0B02440	0.535675	0.121115	FALSE	2.27534e-17	1.33298	TRUE	0.863709	-0.0668864	FALSE	0.00252565	-0.454836	FALSE
Chr_2	409651	410844	-	1194	NCAS_0B02450	0.0074549	0.434086	FALSE	6.42704e-10	1.078	TRUE	0.264737	0.283574	FALSE	0.394309	0.181482	FALSE
Chr_2	411351	412871	+	1521	NCAS_0B02460	3.31337e-08	1.37823	TRUE	1.56082e-15	2.17232	TRUE	0.0329432	0.572686	FALSE	0.151389	0.385187	FALSE
Chr_2	413165	414421	+	1257	NCAS_0B02470	0.301636	0.21895	FALSE	7.95209e-23	1.86472	TRUE	0.863326	-0.0812243	FALSE	0.0718238	-0.35015	FALSE
Chr_2	414819	415418	+	600	NCAS_0B02480	0.0697332	0.470689	FALSE	1.30444e-16	2.08793	TRUE	0.720601	0.182933	FALSE	0.269117	-0.295278	FALSE
Chr_2	415616	416095	-	480	NCAS_0B02490	0.999467	0.00243828	FALSE	0.495279	0.118253	FALSE	0.612174	-0.177281	FALSE	0.220337	-0.251847	FALSE
Chr_2	416748	417758	-	1011	NCAS_0B02500	3.22806e-19	1.71347	TRUE	1.89539e-27	2.34563	TRUE	9.90288e-07	1.02188	TRUE	3.2772e-07	1.07492	TRUE
Chr_2	418829	421171	-	2343	NCAS_0B02510	0.0207866	0.34349	FALSE	5.03902e-09	0.920899	FALSE	0.933225	-0.0372229	FALSE	0.0334891	-0.325153	FALSE
Chr_2	422176	422730	+	555	NCAS_0B02520	0.495256	0.113245	FALSE	0.000684557	0.485771	FALSE	0.493802	-0.200272	FALSE	0.57281	-0.12041	FALSE
Chr_2	422882	424207	-	1326	NCAS_0B02530	0.266074	0.27079	FALSE	0.884932	-0.030502	FALSE	0.30081	-0.334184	FALSE	0.047163	-0.486043	FALSE
Chr_2	424913	425623	-	711	NCAS_0B02540	6.23492e-08	0.738668	FALSE	1.6236e-27	1.69086	TRUE	0.103938	0.401224	FALSE	2.78165e-05	0.843976	FALSE
Chr_2	425888	427057	-	1170	NCAS_0B02550	0.631961	-0.0967405	FALSE	2.63769e-16	1.39658	TRUE	0.286966	-0.225374	FALSE	0.000713196	-0.518024	FALSE
Chr_2	427447	429183	-	1737	NCAS_0B02560	0.4572	0.142696	FALSE	1.86991e-31	1.80752	TRUE	0.994395	0.00553451	FALSE	0.225011	-0.223813	FALSE
Chr_2	429423	431195	+	1773	NCAS_0B02570	0.086839	0.304723	FALSE	6.55264e-33	2.01465	TRUE	0.482753	0.184707	FALSE	0.895306	-0.0266428	FALSE
Chr_2	431287	433008	-	1722	NCAS_0B02580	1.73001e-83	2.59594	TRUE	7.98e-36	2.04785	TRUE	4.29865e-71	2.51375	TRUE	6.17727e-62	2.35315	TRUE
Chr_2	434026	434478	+	453	NCAS_0B02590	0.855116	0.0555629	FALSE	0.0453971	0.407154	FALSE	0.892523	-0.0600822	FALSE	0.0332241	-0.346591	FALSE
Chr_2	434868	436256	+	1389	NCAS_0B02600	0.434143	0.170074	FALSE	1.28357e-27	1.96955	TRUE	0.850147	-0.0803146	FALSE	0.145969	-0.259655	FALSE
Chr_2	436531	438924	+	2394	NCAS_0B02610	0.0118673	0.452934	FALSE	1.59997e-12	1.33104	TRUE	0.445391	0.198141	FALSE	0.950723	0.0147323	FALSE
Chr_2	439174	442092	+	2919	NCAS_0B02620	0.960776	-0.0109011	FALSE	4.77105e-11	0.953194	FALSE	0.813926	-0.0950844	FALSE	0.0364819	-0.35858	FALSE
Chr_2	442293	443186	-	894	NCAS_0B02630	0.207154	0.204337	FALSE	2.99198e-13	1.10927	TRUE	0.745889	-0.114598	FALSE	0.00179849	-0.503509	FALSE
Chr_2	443483	444052	+	570	NCAS_0B02640	6.67267e-14	0.954512	FALSE	1.78971e-10	0.971321	FALSE	6.65951e-06	0.69752	FALSE	0.0214656	0.379223	FALSE
Chr_2	444160	445785	-	1626	NCAS_0B02650	0.558199	0.14689	FALSE	2.92564e-25	1.97092	TRUE	0.687671	-0.141634	FALSE	0.00109267	-0.568856	FALSE
Chr_2	446063	448138	-	2076	NCAS_0B02660	9.0553e-18	1.27167	TRUE	5.45991e-38	2.2869	TRUE	3.10929e-13	1.17212	TRUE	7.03635e-16	1.29517	TRUE
Chr_2	448868	449779	+	912	NCAS_0B02670	1.99446e-13	0.988876	FALSE	6.96391e-12	1.10251	TRUE	2.34866e-09	0.978152	FALSE	8.83463e-09	0.946502	FALSE
Chr_2	450019	451605	-	1587	NCAS_0B02680	0.498826	0.10568	FALSE	4.90269e-10	0.843637	FALSE	0.781641	0.125418	FALSE	0.000740971	0.648833	FALSE
Chr_2	452039	452596	+	558	NCAS_0B02690	0.491141	0.147336	FALSE	1.94196e-08	1.02605	TRUE	0.50233	-0.237109	FALSE	0.506066	0.171926	FALSE
Chr_2	452705	454039	-	1335	NCAS_0B02700	0.76778	-0.103825	FALSE	6.62465e-15	1.85369	TRUE	0.987252	0.0123197	FALSE	0.0773236	-0.366813	FALSE
Chr_2	454219	456036	+	1818	NCAS_0B02710	0.928449	0.0397218	FALSE	2.2406e-23	1.81767	TRUE	0.816074	-0.0956567	FALSE	0.01965	-0.406435	FALSE
Chr_2	456271	459615	-	3345	NCAS_0B02720	0.755769	0.0934597	FALSE	2.29704e-09	1.17069	TRUE	0.922859	0.0488256	FALSE	0.22019	-0.223706	FALSE
Chr_2	459931	464904	-	4974	NCAS_0B02730	0.89841	0.0467862	FALSE	1.31823e-08	1.15552	TRUE	0.72695	-0.107979	FALSE	0.000309818	-0.515706	FALSE
Chr_2	465411	466076	-	666	NCAS_0B02740	0.481617	0.102478	FALSE	5.35884e-05	0.508638	FALSE	0.962452	-0.0314548	FALSE	0.951632	0.0175805	FALSE
Chr_2	467476	467874	-	399	NCAS_0B02750	0.100336	0.211636	FALSE	1.12153e-75	2.36988	TRUE	0.702572	-0.12079	FALSE	0.322459	-0.168626	FALSE
Chr_2	468584	468973	+	390	NCAS_0B02760	0.39177	0.131217	FALSE	4.11678e-58	2.18022	TRUE	0.191071	-0.246066	FALSE	0.00119839	-0.47547	FALSE
Chr_2	469994	470920	+	927	NCAS_0B02770	1.4364e-10	0.936884	FALSE	6.29913e-45	2.39385	TRUE	3.56645e-06	0.833479	FALSE	6.28107e-05	0.730694	FALSE
Chr_2	471375	472313	-	939	NCAS_0B02780	9.31489e-05	0.544106	FALSE	6.9452e-19	1.38276	TRUE	0.00411388	0.574738	FALSE	0.0381724	0.419027	FALSE
Chr_2	472498	473748	-	1251	NCAS_0B02790	5.97812e-07	0.813274	FALSE	7.26493e-17	1.53674	TRUE	7.5374e-07	0.870098	FALSE	0.000561602	0.632828	FALSE
Chr_2	474061	476130	-	2070	NCAS_0B02800	0.244482	0.225536	FALSE	1.54273e-13	1.2992	TRUE	0.7916	0.097423	FALSE	0.0129393	-0.395691	FALSE
Chr_2	476392	477675	+	1284	NCAS_0B02810	0.788348	0.0786771	FALSE	1.41074e-36	2.21677	TRUE	0.940591	0.0359293	FALSE	0.00108131	-0.521918	FALSE
Chr_2	477963	479156	+	1194	NCAS_0B02820	0.5711	0.341841	FALSE	6.95615e-12	2.54515	TRUE	0.28493	0.481733	FALSE	0.446236	-0.279438	FALSE
Chr_2	479542	483249	+	3708	NCAS_0B02830	0.263826	0.246289	FALSE	9.38644e-21	1.83267	TRUE	0.953239	-0.0276421	FALSE	0.0213915	-0.354561	FALSE
Chr_2	483481	486939	-	3459	NCAS_0B02840	4.82196e-32	1.5519	TRUE	4.91489e-24	1.61157	TRUE	2.13461e-19	1.24192	TRUE	1.10889e-09	0.864464	FALSE
Chr_2	487549	488610	-	1062	NCAS_0B02850	0.475294	0.114879	FALSE	1.05408e-05	0.612941	FALSE	0.774703	0.1421	FALSE	0.00394946	0.623285	FALSE
Chr_2	488982	491591	-	2610	NCAS_0B02860	0.350181	0.238975	FALSE	1.66147e-18	1.98651	TRUE	0.748741	0.156598	FALSE	0.273769	0.265554	FALSE
Chr_2	491974	493653	-	1680	NCAS_0B02870	0.817564	0.0504689	FALSE	1.55133e-06	0.731501	FALSE	0.954209	-0.0307996	FALSE	0.989938	0.00330876	FALSE
Chr_2	494164	494739	-	576	NCAS_0B02880	0.00730299	0.3312	FALSE	9.13127e-15	1.03376	TRUE	0.831261	0.102139	FALSE	0.336259	0.206791	FALSE
Chr_2	495184	497784	+	2601	NCAS_0B02890	0.0106883	0.520249	FALSE	2.68364e-20	1.87958	TRUE	0.986266	0.0129032	FALSE	0.0517109	-0.388013	FALSE
Chr_2	498117	500300	-	2184	NCAS_0B02900	0.81557	0.0567055	FALSE	3.22602e-13	1.20973	TRUE	0.913009	-0.0475225	FALSE	0.0397111	-0.320377	FALSE
Chr_2	500983	501225	-	243	NCAS_0B02910	0.263117	-0.221353	FALSE	0.000127431	0.731937	FALSE	0.909095	-0.0871658	FALSE	0.67054	0.136621	FALSE
Chr_2	501600	503942	-	2343	NCAS_0B02920	0.444234	0.18201	FALSE	1.09265e-29	2.12206	TRUE	0.816074	-0.0895348	FALSE	5.47931e-06	-0.696093	FALSE
Chr_2	504501	506606	+	2106	NCAS_0B02930	0.823975	0.111005	FALSE	1.68752e-07	1.29625	TRUE	0.400743	-0.244333	FALSE	0.0453321	-0.414519	FALSE
Chr_2	506775	509387	-	2613	NCAS_0B02940	4.75417e-12	0.876495	FALSE	2.24459e-28	1.6575	TRUE	9.96175e-06	0.653426	FALSE	0.00300647	0.454693	FALSE
Chr_2	509751	511889	-	2139	NCAS_0B02950	0.21524	0.23607	FALSE	1.72505e-20	1.64253	TRUE	0.847684	-0.0854896	FALSE	0.582235	-0.115035	FALSE
Chr_2	512371	513375	-	1005	NCAS_0B02960	0.917055	0.0220134	FALSE	3.19289e-15	1.22794	TRUE	0.598947	0.237786	FALSE	0.0001518	0.907507	FALSE
Chr_2	513418	513882	-	465	NCAS_0B02970	0.567527	0.132394	FALSE	5.56629e-17	1.6782	TRUE	0.988317	0.0262063	FALSE	0.000458618	1.60427	TRUE
Chr_2	514099	515658	+	1560	NCAS_0B02980	8.49452e-32	1.55533	TRUE	2.39818e-17	1.36588	TRUE	1.83483e-17	1.32944	TRUE	2.02682e-20	1.44752	TRUE
Chr_2	515783	517174	+	1392	NCAS_0B02990	8.49751e-17	1.18658	TRUE	6.38678e-24	1.70706	TRUE	7.68206e-14	1.01676	TRUE	8.02743e-06	0.634307	FALSE
Chr_2	517254	518399	-	1146	NCAS_0B03000	0.00615229	0.441867	FALSE	3.93593e-21	1.58792	TRUE	0.743428	0.115619	FALSE	0.850046	-0.0385185	FALSE
Chr_2	519106	519828	+	723	NCAS_0B03010	0.00207337	0.513449	FALSE	1.37786e-06	0.877133	FALSE	0.0145135	0.467235	FALSE	0.327359	0.198229	FALSE
Chr_2	519918	521741	-	1824	NCAS_0B03020	0.178681	0.30911	FALSE	1.37061e-13	1.52877	TRUE	0.955199	0.0304684	FALSE	0.229109	-0.220083	FALSE
Chr_2	522163	524217	+	2055	NCAS_0B03030	0.836152	0.0401487	FALSE	0.000627062	0.461331	FALSE	0.964826	0.0227295	FALSE	0.454976	-0.142392	FALSE
Chr_2	524519	526291	+	1773	NCAS_0B03040	0.18692	0.222725	FALSE	2.96415e-47	2.21857	TRUE	0.768043	0.150882	FALSE	0.00602477	0.614733	FALSE
Chr_2	526367	527455	-	1089	NCAS_0B03050	0.248593	0.351823	FALSE	7.14638e-22	2.23231	TRUE	0.396018	0.286458	FALSE	0.640031	-0.125358	FALSE
Chr_2	528273	530834	+	2562	NCAS_0B03060	0.789359	0.0862144	FALSE	8.41526e-18	1.78941	TRUE	0.515825	-0.199033	FALSE	0.000220842	-0.672974	FALSE
Chr_2	531217	532326	+	1110	NCAS_0B03070	0.888748	-0.0564302	FALSE	1.47308e-10	1.91367	TRUE	0.53499	-0.155441	FALSE	0.00215009	-0.456592	FALSE
Chr_2	532542	533192	-	651	NCAS_0B03080	3.83553e-18	1.56048	TRUE	1.0329e-17	1.83199	TRUE	6.39323e-19	1.21327	TRUE	7.95283e-12	0.954684	FALSE
Chr_2	533327	534787	-	1461	NCAS_0B03090	0.00112626	0.430406	FALSE	1.78834e-15	1.15722	TRUE	0.112069	0.33981	FALSE	0.122382	0.294542	FALSE
Chr_2	534985	536580	+	1596	NCAS_0B03100	5.065e-12	1.16822	TRUE	1.0363e-25	2.06274	TRUE	1.49846e-10	0.991773	FALSE	0.000219133	0.604122	FALSE
Chr_2	536705	541201	-	4497	NCAS_0B03110	0.402781	0.151111	FALSE	3.00734e-27	1.66911	TRUE	0.976522	-0.0142205	FALSE	0.0115383	-0.415018	FALSE
Chr_2	541496	542887	-	1392	NCAS_0B03120	2.43789e-15	1.35583	TRUE	6.77402e-32	2.28434	TRUE	1.23199e-07	0.873689	FALSE	0.000765127	0.588368	FALSE
Chr_2	543095	543598	+	504	NCAS_0B03130	0.142198	0.396948	FALSE	1.29975e-06	1.21404	TRUE	0.797367	0.112949	FALSE	0.035576	-0.413014	FALSE
Chr_2	543694	544245	-	552	NCAS_0B03140	0.000400434	0.558578	FALSE	6.47671e-16	1.42871	TRUE	0.829531	-0.102748	FALSE	0.198459	0.275534	FALSE
Chr_2	544870	545514	-	645	NCAS_0B03150	0.766001	0.068842	FALSE	6.94107e-05	0.654219	FALSE	0.797359	-0.10581	FALSE	0.15876	-0.263494	FALSE
Chr_2	545832	548078	-	2247	NCAS_0B03160	0.902342	0.0426887	FALSE	1.4409e-18	1.51808	TRUE	0.972663	0.0195185	FALSE	0.616688	-0.110466	FALSE
Chr_2	549001	550002	-	1002	NCAS_0B03170	8.39132e-32	2.25973	TRUE	1.51782e-25	2.36014	TRUE	5.40987e-44	2.19709	TRUE	4.46972e-34	1.9573	TRUE
Chr_2	550741	551667	+	927	NCAS_0B03180	0.0908107	0.25816	FALSE	1.34084e-16	1.22596	TRUE	0.920419	0.0597984	FALSE	0.345475	0.20905	FALSE
Chr_2	551913	552665	-	753	NCAS_0B03190	0.207579	0.203026	FALSE	4.43645e-11	1.00893	TRUE	0.952361	0.0312701	FALSE	0.917757	-0.0215589	FALSE
Chr_2	553380	554438	+	1059	NCAS_0B03200	8.91093e-05	0.717731	FALSE	1.98007e-23	1.96727	TRUE	8.47415e-05	0.68323	FALSE	0.150135	0.277881	FALSE
[truncated: 3,775 more rows]

## Sheet: Table S3 - Putative novel mRNAs
Chr	Start	Stop	Strand	Length	ID	Translated
[truncated: 56 more rows]

## Sheet: Table S4 - Oligonucleotides
ID	Sequence 5’-3’	Target	Use
[truncated: 41 more rows]

## Sheet: Table S5 - Mapping stats
Total RNA-Seq					Small RNA-Seq
[truncated: 26 more rows]
